# Supplementary material for: Alternative Splicing Dynamics of the Hypothalamus–Pituitary–Ovary Axis During Pubertal Transition in Gilts
Source: Front Genet. 2021 Apr 30;12:592669. doi: 10.3389/fgene.2021.592669 (PMC8120244; doi:10.3389/fgene.2021.592669)
Supplement: Supplementary file 5 [file Table_1.XLSX]

## Sheet: Table S1
Table S1. Mapping efficiency of RNA-seq data of pubertal hypothalamus-pituitary-ovary tissues in gilts
Stage	sample	clean reads of paired	clean base	mapped reads	mapped rate	uniquely mapped rate
Pre_puberty	Hypothalamus_1	69565386	10434807900	6.52593e+07	0.9381	0.8504
	Hypothalamus_2	69054090	10358113500	6.55738e+07	0.9496	0.842
	Hypothalamus_3	62284976	9342746400	5.86475e+07	0.9416	0.864
In_puberty	Hypothalamus_4	76702460	11505369000	6.76132e+07	0.8815	0.7659
	Hypothalamus_5	67578114	10136717100	6.31315e+07	0.9342	0.8382
	Hypothalamus_6	65642586	9846387900	6.21373e+07	0.9466	0.8734
Post_puberty	Hypothalamus_7	65239544	9785931600	6.1958e+07	0.9497	0.8202
	Hypothalamus_8	63274910	9491236500	6.01365e+07	0.9504	0.8916
	Hypothalamus_9	71649090	10747363500	6.78445e+07	0.9469	0.8795
Pre_puberty	Pituitary_1	72010632	10801594800	6.71067e+07	0.9319	0.7909
	Pituitary_2	85810964	12871644600	8.03448e+07	0.9363	0.8241
	Pituitary_3	70431512	10564726800	6.46139e+07	0.9174	0.8206
In_puberty	Pituitary_4	71866530	10779979500	6.77917e+07	0.9433	0.8078
	Pituitary_5	81775976	12266396400	7.55038e+07	0.9233	0.7841
	Pituitary_6	71945598	10791839700	6.8226e+07	0.9483	0.8475
Post_puberty	Pituitary_7	64008120	9601218000	6.04813e+07	0.9449	0.8682
	Pituitary_8	75348002	11302200300	7.17012e+07	0.9516	0.8588
	Pituitary_9	79659812	11948971800	7.5645e+07	0.9496	0.831
Pre_puberty	ovary_1	63231014	9484652100	5.94308e+07	0.9399	0.8737
	ovary_2	74681678	11202251700	6.98796e+07	0.9357	0.8718
	ovary_3	69630248	10444537200	6.60234e+07	0.9482	0.8761
In_puberty	ovary_4	61977036	9296555400	5.03068e+07	0.8117	0.7466
	ovary_5	58629344	8794401600	5.53813e+07	0.9446	0.8556
	ovary_6	71088616	10663292400	6.73494e+07	0.9474	0.8725
Post_puberty	ovary_7	63467488	9520123200	6.02243e+07	0.9489	0.8297
	ovary_8	65048680	9757302000	6.20109e+07	0.9533	0.8696
	ovary_9	69483922	10422588300	6.58847e+07	0.9482	0.9533

## Sheet: Table S2
Table S2. Counts of alternative splicing events among the pubertal hypothalamus, pituitary and ovary (PSI>0.1,FDR<0.05)
	Hypothalamus			Pituitary			Ovary
	Pre-puberty	In-puberty	Post-puberty	Pre-puberty	In-puberty	Post-puberty	Pre-puberty	In-puberty	Post-puberty
A3SS	3835	3882	3864	3842	3722	3729	3623	3639	3709
A5SS	4269	4250	4208	4049	3964	4014	3886	3773	3966
MXE	646	639	635	566	565	572	532	503	527
Cassette	11072	10991	11093	9321	9438	9201	9341	8932	9539
Cassette_multi	2261	2235	2294	1950	1894	1901	1889	1780	1878
IR	4270	4249	4208	3787	3751	3703	4321	4363	4186
AltStart	4983	4852	4910	4433	4431	4367	3963	3831	4269
AltEnd	2199	2156	2193	2303	2370	2280	2012	1863	2049
SUM	33535	33254	33405	30251	30135	29767	29567	28684	30123

## Sheet: Table S3
Table S3. The DSGs of staged differentially AS in hypothalamus
DSGs	Location	delta_PSI	P-Value	FDR	DEAS events	Group
AAGAB	1:165180564-165180640	-0.0553508	0.000322421	0.0105628	Cassette	Pre vs In
ABCA5	12:11083000-11083125	0.132712	9.24227e-05	0.003921	AltStart	Pre vs In
ABCG2	8:130912360-130912419	0.0869238	3.1796e-08	7.52091e-06	Cassette	In vs Post
ABCG2	8:130967958-130968017	-0.136203	0.000522558	0.0226607	Cassette	In vs Post
ABCG2	8:130912360-130912419	0.0869238	6.44288e-09	9.93025e-07	Cassette	Pre vs Post
ABCG2	8:130967958-130968017	-0.208424	5.98998e-07	5.7986e-05	Cassette	Pre vs Post
ABCG2	8:130936094-130936155	0.0600445	0.00176922	0.0420576	A5SS	Pre vs Post
ABCG2	8:130988689-130988718	0.157895	0.00198379	0.045924	A3SS	Pre vs Post
ABCG2	8:130917846-130917926	0.0332623	0.00198815	0.0459673	AltStart	Pre vs Post
ABHD14A	13:34104425-34104526	0.486111	2.37416e-08	3.38899e-06	AltStart	Pre vs Post
ABHD14B	13:34104241-34104523	0.660377	3.44519e-05	0.00195017	MXE	Pre vs Post
ABI1	10:49056944-49057030	0.288671	5.927e-06	0.000388835	Cassette	Pre vs In
ABI1	10:49056944-49057030	0.248306	2.96469e-05	0.00171893	Cassette	Pre vs Post
ABI2	15:106860866-106861048	0.178371	8.3795e-08	1.70333e-05	Cassette	In vs Post
ABI2	15:106860866-106861048	-0.111638	0.000848905	0.0219358	Cassette	Pre vs In
ABI3BP	13:158162867-158162938	-0.2307	2.30646e-07	4.28655e-05	Cassette	In vs Post
ABI3BP	13:158162867-158162938	-0.207057	0.000139096	0.00628165	Cassette	Pre vs Post
ABLIM1	14:124790128-124790247	0.134718	1.20275e-05	0.0007059	Cassette	Pre vs In
ABLIM1	14:124762780-124763552	0.123188	0.000136168	0.00535992	IR	Pre vs In
ABLIM1	14:124776188-124776334	0.134931	0.000154612	0.0068712	Cassette	Pre vs Post
ABLIM1	14:124790128-124790247	0.119731	0.000374087	0.0136086	Cassette	Pre vs Post
ABLIM1	14:124781203-124781307	-0.11706	0.000410802	0.0147199	Cassette_multi	Pre vs Post
ABLIM2	8:2988578-2988658	0.293328	5.11748e-07	8.59044e-05	AltStart	In vs Post
ABLIM2	8:3020759-3020860	0.13726	0.00034236	0.0168188	Cassette_multi	In vs Post
ABLIM2	8:2988578-2988658	-0.217979	0.000147999	0.00565552	AltStart	Pre vs In
ABLIM2	8:3016235-3016333	-0.310846	0.000296567	0.0116085	Cassette	Pre vs Post
ABLIM3	2:150260747-150260758	-0.425539	0.000193879	0.0107331	Cassette	In vs Post
ABLIM3	2:150386686-150386715	0.104651	0.000636672	0.0263783	Cassette	In vs Post
ABLIM3	2:150387975-150388073	-0.216627	0.00177316	0.0421085	Cassette	Pre vs Post
ABR	12:46840131-46840317	-0.0471701	0.00114381	0.0275695	AltStart	Pre vs In
ABR	12:46873839-46873919	0.0424243	1.10942e-05	0.00073398	AltStart	Pre vs Post
ABRAXAS2	14:134158384-134158530	0.193743	0.000837741	0.0216901	AltStart	Pre vs In
ABRAXAS2	14:134158384-134158530	0.301807	8.92506e-05	0.00435719	AltStart	Pre vs Post
ACAP2	13:132291401-132291505	0.143395	1.01817e-06	0.000154923	Cassette	In vs Post
ACAP2	13:132291401-132291505	-0.0977426	0.000589322	0.016884	Cassette	Pre vs In
ACBD6	9:122028403-122028508	0.0434783	3.22584e-05	0.00160838	Cassette	Pre vs In
ACLY	12:20817671-20817700	-0.176345	9.68539e-09	1.24277e-06	Cassette	Pre vs In
ACLY	12:20817671-20817700	-0.148455	1.74722e-06	0.000149481	Cassette	Pre vs Post
ACOT13	7:19522502-19522576	0.122177	2.76963e-05	0.00141597	Cassette	Pre vs In
ACOT8	17:48038383-48038393	-0.829545	5.40529e-16	1.9928e-13	Cassette	Pre vs In
ACOT8	17:48038383-48038393	-0.851351	6.57475e-16	2.69821e-13	Cassette	Pre vs Post
ACOT8	17:48052430-48052566	-0.107244	0.00168931	0.041083	Cassette	Pre vs Post
ACSF2	12:26738940-26738982	0.0433338	0.00132354	0.0345554	Cassette	Pre vs Post
ACSF3	6:684771-684883	0.0674157	0.00221588	0.0443108	Cassette	Pre vs In
ACSL1	15:45918338-45918553	-0.177045	0.000436601	0.0196987	AltStart	In vs Post
ACSL1	15:45918338-45918553	0.203812	2.16029e-05	0.00114935	AltStart	Pre vs In
ACTA1	14:60413921-60414028	-0.628022	2.34726e-07	2.63824e-05	IR	Pre vs Post
ACTB	3:4087324-4087350	-0.165447	4.07061e-28	5.88407e-25	Cassette	In vs Post
ACTB	3:4076135-4076163	-0.265626	1.09554e-21	8.38375e-19	Cassette	In vs Post
ACTB	3:4077038-4077057	0.186869	2.77165e-17	1.56773e-14	Cassette	In vs Post
ACTB	3:4072656-4072736	0.422794	1.81001e-09	5.11899e-07	AltEnd	In vs Post
ACTB	3:4087385-4087465	0.0323129	3.41359e-05	0.00277557	AltEnd	In vs Post
ACTB	3:4087349-4087492	0.0293863	3.48003e-05	0.00282078	IR	In vs Post
ACTB	3:4087349-4087492	-0.00559539	1.50431e-15	5.39408e-13	IR	Pre vs In
ACTB	3:4077036-4077058	0.386191	7.39779e-15	2.33307e-12	Cassette	Pre vs In
ACTB	3:4087324-4087465	0.080966	0.000560661	0.0162884	Cassette	Pre vs In
ACTB	3:4077036-4077058	0.567251	3.62713e-66	1.19083e-62	Cassette	Pre vs Post
ACTB	3:4076077-4076157	1	4.52466e-30	4.40149e-27	AltEnd	Pre vs Post
ACTB	3:4087324-4087350	-0.0985401	2.46202e-16	1.06008e-13	Cassette	Pre vs Post
ACTB	3:4076157-4076162	-0.673469	2.18294e-10	4.09555e-08	A3SS	Pre vs Post
ACTB	3:4087349-4087492	0.0237909	1.33441e-06	0.000118007	IR	Pre vs Post
ACTR2	3:76718390-76718407	0.171544	2.40086e-14	6.83266e-12	Cassette	Pre vs In
ACTR2	3:76718390-76718407	0.16161	2.1772e-12	5.71842e-10	Cassette	Pre vs Post
ACTR5	17:41718107-41718126	-0.297852	0.000210078	0.00749183	A3SS	Pre vs In
ACVR2A	15:4195944-4195967	-0.110276	0.00161147	0.0499152	Cassette	In vs Post
ACVR2A	15:4195944-4195967	0.136204	0.000337153	0.0109495	Cassette	Pre vs In
ADAM22	9:68466149-68466343	0.164058	2.45953e-10	4.18056e-08	Cassette	Pre vs In
ADAM22	9:68469374-68469410	0.0791384	2.04733e-05	0.00109593	AltEnd	Pre vs In
ADAM22	9:68469374-68469410	0.0876715	4.17002e-07	4.2617e-05	AltEnd	Pre vs Post
ADAM22	9:68466149-68466343	0.115298	2.0034e-06	0.000167577	Cassette	Pre vs Post
ADAM22	9:68471444-68471554	-0.187179	0.000530025	0.0178019	MXE	Pre vs Post
ADAM23	15:109870053-109870143	-0.0777017	0.000603768	0.0171599	MXE	Pre vs In
ADAM3A	17:9139757-9140151	-0.170251	0.000725418	0.0291725	A3SS	In vs Post
ADAT2	1:21814690-21814726	-0.364706	0.000701424	0.0284397	Cassette	In vs Post
ADCY6	5:14851092-14851172	-0.34058	0.000198061	0.010895	AltStart	In vs Post
ADCY7	6:34564171-34564251	0.274308	0.00177909	0.0383544	AltStart	Pre vs In
ADCY7	6:34564171-34564251	0.308461	0.000898119	0.0260941	AltStart	Pre vs Post
ADCY8	4:9813544-9813633	-0.188112	9.04249e-05	0.00385499	Cassette	Pre vs In
ADCYAP1R1	18:41971555-41971721	0.0277855	0.00138112	0.0319179	AltStart	Pre vs In
ADCYAP1R1	18:41926343-41926426	-0.0966222	0.00258826	0.0494898	Cassette_multi	Pre vs In
ADCYAP1R1	18:41926343-41926426	-0.141989	9.43544e-06	0.000645369	Cassette_multi	Pre vs Post
ADD1	8:1707270-1707303	0.12238	7.17593e-05	0.00318909	Cassette	Pre vs In
ADD3	14:120580761-120580856	0.12188	4.72855e-05	0.00358694	Cassette	In vs Post
ADGRG1	6:19548050-19548486	0.119691	0.00142607	0.03263	AltStart	Pre vs In
ADGRL2	6:132348556-132348614	-0.217544	0.0017172	0.0373955	Cassette	Pre vs In
ADGRL2	6:131739083-131739127	0.183092	0.00156713	0.0390889	Cassette_multi	Pre vs Post
ADK	14:76864322-76864497	0.413443	1.85241e-07	3.54397e-05	AltStart	In vs Post
ADK	14:76864322-76864497	-0.451123	5.74809e-09	7.75339e-07	AltStart	Pre vs In
ADM5	6:54733547-54733627	-0.0548611	0.000286568	0.0144221	AltStart	In vs Post
ADORA1	9:113854297-113854377	0.1588	0.000137602	0.00834562	AltEnd	In vs Post
ADORA1	9:113854297-113854423	0.11537	0.00175161	0.041907	Cassette	Pre vs Post
ADSSL1	AEMK02000452.1:3017044-3017200	0.0653627	0.00213037	0.0483614	Cassette	Pre vs Post
AFDN	1:1611855-1611875	0.149276	0.000238151	0.00832289	Cassette	Pre vs In
AFDN	1:1611855-1611875	0.214167	3.7184e-07	3.86023e-05	Cassette	Pre vs Post
AFTPH	3:77366125-77366185	0.0200401	0.00176115	0.0419752	Cassette_multi	Pre vs Post
AGAP1	15:135631811-135631822	-0.310433	2.7575e-11	9.6956e-09	Cassette	In vs Post
AGAP1	15:135631811-135631822	0.642947	1.13365e-38	1.74556e-35	Cassette	Pre vs In
AGAP1	15:135593369-135594436	0.0726976	0.000871086	0.0223326	AltStart	Pre vs In
AGAP1	15:135631811-135631822	0.332514	5.59433e-11	1.15697e-08	Cassette	Pre vs Post
AGO3	6:92157490-92157631	0.184869	1.3156e-05	0.000761883	Cassette	Pre vs In
AGPAT4	1:6771989-6771996	0.25554	0.00103454	0.0289065	A5SS	Pre vs Post
AGPAT4	1:6772558-6772564	-0.102569	0.00181037	0.0427602	Cassette	Pre vs Post
AGT	14:59656314-59656347	-0.000848144	0.000131078	0.00521329	IR	Pre vs In
AGT	14:59656314-59656347	-0.00173957	4.93843e-05	0.00262567	IR	Pre vs Post
AHI1	1:28743929-28743970	0.0892697	1.69849e-05	0.00094194	Cassette	Pre vs In
AHI1	1:28644912-28645065	0.0761398	0.00079114	0.0209816	Cassette	Pre vs In
AHI1	1:28644912-28645065	0.1049	6.50296e-09	9.93025e-07	Cassette	Pre vs Post
AHI1	1:28743929-28743970	0.100679	1.85597e-07	2.13803e-05	Cassette	Pre vs Post
AHI1	1:28638433-28638608	0.0269492	0.000821528	0.0243537	Cassette	Pre vs Post
AHNAK	2:9205969-9206121	-0.828571	1.12308e-11	4.05853e-09	A5SS	In vs Post
AHNAK	2:9206716-9206830	0.955506	6.73448e-11	2.24647e-08	A5SS	In vs Post
AHNAK	2:9202566-9202687	-0.84048	7.80884e-06	0.000838054	MXE	In vs Post
AHNAK	2:9210937-9211074	0.746544	1.39057e-05	0.00132532	A5SS	In vs Post
AHNAK	2:9205817-9205879	-0.267306	2.25382e-05	0.00194334	Cassette	In vs Post
AHNAK	2:9210985-9211370	0.183635	5.33095e-05	0.00392477	IR	In vs Post
AHNAK	2:9201266-9202550	0.347575	0.000781978	0.0307811	Cassette	In vs Post
AHNAK	2:9201177-9201257	0.186559	2.49335e-11	4.79897e-09	AltStart	Pre vs In
AHNAK	2:9208423-9208477	-0.32533	2.61172e-11	4.9901e-09	Cassette	Pre vs In
AHNAK	2:9206797-9206802	-0.2334	1.81121e-10	3.1191e-08	Cassette	Pre vs In
AHNAK	2:9205817-9205879	-0.457859	6.8753e-09	9.08928e-07	MXE	Pre vs In
AHNAK	2:9209084-9209210	0.794364	7.85717e-08	8.534e-06	A3SS	Pre vs In
AHNAK	2:9210945-9211074	-0.834483	8.22104e-08	8.85572e-06	A5SS	Pre vs In
AHNAK	2:9207067-9207101	-0.355891	2.50721e-07	2.36927e-05	A3SS	Pre vs In
AHNAK	2:9206200-9206298	0.423721	8.6412e-07	7.15798e-05	MXE	Pre vs In
AHNAK	2:9204341-9204377	-0.337348	5.98477e-06	0.000390667	A3SS	Pre vs In
AHNAK	2:9210985-9211370	-0.181663	6.27115e-06	0.000407329	IR	Pre vs In
AHNAK	2:9200475-9200497	0.538101	1.88815e-05	0.00102356	Cassette	Pre vs In
AHNAK	2:9207031-9207066	-0.184286	2.31409e-05	0.00121634	MXE	Pre vs In
AHNAK	2:9208478-9208852	-0.599757	4.22075e-05	0.0020161	A3SS	Pre vs In
AHNAK	2:9206569-9206716	0.193214	0.000116717	0.00475147	Cassette	Pre vs In
AHNAK	2:9205915-9206184	0.261144	0.000559301	0.0162884	Cassette	Pre vs In
AHNAK	2:9212227-9212341	-0.424323	0.000780744	0.020748	A3SS	Pre vs In
AHNAK	2:9209586-9209971	0.118349	0.00104879	0.0258019	IR	Pre vs In
AHNAK	2:9209682-9209796	0.304235	0.00220225	0.0441056	A5SS	Pre vs In
AHNAK	2:9201177-9201257	0.185772	3.18881e-10	5.81625e-08	AltStart	Pre vs Post
AHNAK	2:9205915-9205969	0.44715	9.33189e-08	1.16448e-05	Cassette	Pre vs Post
AHNAK	2:9204341-9204403	0.846154	5.53573e-07	5.42523e-05	MXE	Pre vs Post
AHNAK	2:9201266-9201391	0.147268	5.36757e-06	0.00040165	Cassette	Pre vs Post
AHNAK	2:9206953-9207030	0.302326	2.27835e-05	0.00136002	MXE	Pre vs Post
AHNAK	2:9202566-9202934	-0.273856	0.000568241	0.0187263	Cassette	Pre vs Post
AHNAK	2:9207309-9209028	-1	0.00079286	0.0236911	MXE	Pre vs Post
AHNAK	2:9205496-9205586	-0.17391	0.00215676	0.048876	MXE	Pre vs Post
AIF1	7:23729215-23729266	-0.149828	2.1934e-13	5.46803e-11	AltStart	Pre vs In
AIF1	7:23729630-23729696	-0.0260487	0.000744168	0.0200405	Cassette	Pre vs In
AIF1	7:23729215-23729266	-0.137168	1.36415e-11	3.06233e-09	AltStart	Pre vs Post
AIF1L	1:271075726-271075787	0.022508	0.00134083	0.043828	Cassette	In vs Post
AIFM1	X:106699980-106700122	-0.200145	0.000430472	0.0152789	MXE	Pre vs Post
AIFM3	14:50564868-50565031	0.113529	0.000859364	0.0220778	Cassette	Pre vs In
AIFM3	14:50563117-50563197	0.183284	0.00164435	0.0362616	AltStart	Pre vs In
AIFM3	14:50563117-50563197	0.286486	0.000417768	0.0149085	AltStart	Pre vs Post
AIMP1	8:115475069-115475142	-0.117669	0.00106404	0.0294179	Cassette	Pre vs Post
AIMP1	8:115462012-115462063	-0.0298505	0.00177484	0.0421103	Cassette	Pre vs Post
AK4	6:147257626-147257709	0.359848	0.00027833	0.0093285	AltStart	Pre vs In
AK6	16:47495800-47495880	0.093855	0.00120821	0.0411472	AltEnd	In vs Post
AKAP6	7:67447213-67447274	0.541176	0.00023626	0.0123936	MXE	In vs Post
AKAP6	7:67447213-67447274	-0.6	0.00138723	0.0319649	MXE	Pre vs In
AKAP8L	2:62200967-62201109	0.16712	0.00178908	0.0384807	Cassette	Pre vs In
AKAP8L	2:62200967-62201109	0.182579	0.000367846	0.0134374	Cassette	Pre vs Post
AKAP9	9:72008352-72008390	0.0387931	0.000411059	0.0190648	Cassette	In vs Post
AKAP9	9:72045995-72046174	0.041594	0.000759264	0.0301148	Cassette	In vs Post
AKAP9	9:72008352-72008390	-0.0387931	0.00080736	0.0211334	Cassette	Pre vs In
AKAP9	9:71917619-71917699	-0.0562549	0.00171555	0.0373907	AltEnd	Pre vs In
AKT3	10:16451718-16451798	0.0278428	0.000347349	0.0169562	AltStart	In vs Post
AKT3	10:16585540-16585651	0.49194	0.000119537	0.00553726	MXE	Pre vs Post
ALDH7A1	2:129711966-129712023	-0.322021	0.00138949	0.0451349	Cassette	In vs Post
ALDH7A1	2:129711966-129712023	0.540336	2.02127e-05	0.00108642	Cassette	Pre vs In
ALG8	9:12514001-12514116	0.319444	0.00110061	0.0300495	Cassette	Pre vs Post
ALKBH5	12:60524072-60524152	-0.0511945	4.12706e-05	0.00323439	AltStart	In vs Post
ALKBH8	9:36095331-36095437	-0.769231	0.000808462	0.0211412	MXE	Pre vs In
ALS2CL	13:29602451-29602547	0.311085	0.0007334	0.0227128	Cassette	Pre vs Post
AMDHD2	3:39525651-39525705	-0.084311	0.00155832	0.0389803	Cassette	Pre vs Post
AMFR	6:29412039-29412249	0.0257186	9.55387e-05	0.00630919	A3SS	In vs Post
AMFR	6:29409597-29409647	0.0304114	0.000200257	0.0109926	A5SS	In vs Post
AMFR	6:29411062-29411246	0.0141313	0.000240418	0.0125864	Cassette	In vs Post
AMFR	6:29409597-29409647	0.0304114	0.00124339	0.0328217	A5SS	Pre vs Post
AMFR	6:29412039-29412249	0.0257186	0.00173874	0.0417505	A3SS	Pre vs Post
ANAPC16	14:75092215-75095060	0.0461896	2.02117e-05	0.00108642	AltEnd	Pre vs In
ANAPC16	14:75091421-75095060	0.0394885	2.97568e-05	0.00150687	AltEnd	Pre vs In
ANGEL2	9:130466202-130466328	0.0493506	0.000353368	0.0130598	Cassette	Pre vs Post
ANGPT1	4:30171443-30171523	0.145312	0.00108858	0.0298935	Cassette	Pre vs Post
ANK2	8:109316952-109317044	0.217316	1.5637e-14	4.65129e-12	Cassette	Pre vs In
ANK2	8:109366436-109366471	0.109296	1.444e-05	0.000819915	Cassette	Pre vs In
ANK2	8:109316952-109317044	0.198519	3.5552e-12	8.97859e-10	Cassette	Pre vs Post
ANK2	8:109366436-109366471	0.0873177	0.000852742	0.0250529	Cassette	Pre vs Post
ANKFN1	12:32480008-32480028	0.255182	0.000399446	0.0125453	AltStart	Pre vs In
ANKIB1	9:72163244-72163281	0.048583	0.00152634	0.0483726	Cassette	In vs Post
ANKIB1	9:72163174-72163281	-0.037422	0.000375058	0.0120019	Cassette	Pre vs In
ANKRD10	11:77323886-77323916	-0.269168	3.3845e-05	0.00276054	IR	In vs Post
ANKRD10	11:77343623-77343656	-0.347009	0.00211843	0.0430193	A3SS	Pre vs In
ANKRD10	11:77323886-77323916	-0.317727	1.99442e-06	0.000167359	IR	Pre vs Post
ANKRD28	13:2981756-2981843	0.0475047	0.000160833	0.00606788	Cassette_multi	Pre vs In
ANKRD28	13:3057376-3058350	0.123302	0.000954556	0.0240024	AltStart	Pre vs In
ANKRD34C	7:48406011-48406091	-0.268608	8.50695e-06	0.000523948	AltEnd	Pre vs In
ANKRD34C	7:48406011-48406091	-0.161466	0.0018164	0.0428325	AltEnd	Pre vs Post
ANKRD44	15:100970735-100970822	0.119813	2.96266e-05	0.00150673	Cassette	Pre vs In
ANKRD44	15:100970735-100970822	0.121911	1.29659e-07	1.56935e-05	Cassette	Pre vs Post
ANKRD44	15:100970158-100970212	0.0957247	0.00174742	0.0418758	A3SS	Pre vs Post
ANKRD65	6:63686194-63686309	0.352857	0.00119799	0.0410138	MXE	In vs Post
ANLN	18:37690099-37690171	-0.039791	0.00132353	0.0434263	Cassette	In vs Post
ANLN	18:37690099-37690171	-0.0400935	0.00221426	0.0495415	Cassette	Pre vs Post
ANO3	2:33784581-33784661	0.494944	6.46581e-11	2.18486e-08	AltStart	In vs Post
ANO3	2:33784581-33784661	-0.41482	2.23585e-08	2.69703e-06	AltStart	Pre vs In
AOX1	15:104201535-104201615	0.192439	1.1461e-29	1.07508e-26	AltStart	Pre vs Post
AOX1	15:104236015-104238400	-0.586547	5.61401e-22	3.78082e-19	AltEnd	Pre vs Post
AOX1	15:104258194-104258232	0.0315319	9.68141e-05	0.00466145	A3SS	Pre vs Post
AP1B1	14:46471318-46471326	-0.238584	0.000195868	0.0108202	Cassette	In vs Post
AP1B1	14:46471318-46471326	0.339454	1.9691e-06	0.000146847	Cassette	Pre vs In
AP1B1	14:46480790-46480810	0.102471	0.000657241	0.0182376	Cassette	Pre vs In
AP1G1	6:14757859-14757867	0.365684	7.3497e-08	1.51771e-05	Cassette	In vs Post
AP1G1	6:14757859-14757867	0.204004	0.00204603	0.0468926	Cassette	Pre vs Post
AP1S1	3:8882713-8882793	-0.0517196	0.00200973	0.0416446	AltStart	Pre vs In
AP2M1	13:122099892-122099897	0.11962	6.20939e-05	0.00441928	Cassette	In vs Post
AP2M1	13:122100093-122100099	0.404475	9.07678e-29	8.19289e-26	A3SS	Pre vs In
AP2M1	13:122099892-122099897	-0.211244	9.29843e-14	2.45854e-11	Cassette	Pre vs In
AP2M1	13:122100093-122100099	0.467162	1.73564e-39	2.39929e-36	A3SS	Pre vs Post
AP2M1	13:122099892-122099897	-0.091624	0.000674904	0.0213057	Cassette	Pre vs Post
AP3S1	2:120037925-120037972	0.117827	0.000107211	0.00444042	Cassette	Pre vs In
AP3S1	2:120033392-120033432	0.142337	0.000116636	0.00475147	Cassette	Pre vs In
AP3S1	2:120037925-120037972	0.170686	3.53844e-11	7.49492e-09	Cassette	Pre vs Post
AP3S1	2:120033392-120033432	0.218644	2.80703e-10	5.1557e-08	Cassette	Pre vs Post
APBA2	1:144187552-144187632	-0.0547445	0.000128169	0.00792118	AltStart	In vs Post
APBA2	1:144128117-144128197	-0.0691173	0.000379648	0.0181582	AltStart	In vs Post
APBA2	1:144197045-144197125	-0.0462059	0.000257787	0.00878624	AltEnd	Pre vs In
APBA2	1:144187552-144187632	-0.0545455	6.45724e-05	0.00330603	AltStart	Pre vs Post
APBA2	1:144128117-144128197	-0.0667636	0.00103802	0.0289729	AltStart	Pre vs Post
APBB1	9:3319038-3319043	-0.163512	1.00361e-25	1.13535e-22	Cassette	In vs Post
APBB1	9:3316322-3316361	0.305187	0.000187261	0.0104745	Cassette	In vs Post
APBB1	9:3319038-3319043	-0.166667	1.66209e-24	1.32287e-21	Cassette	Pre vs Post
APC	2:116949638-116949718	-0.0307662	0.000725937	0.0196709	AltStart	Pre vs In
APLP2	9:56846622-56846647	-0.156348	8.88371e-15	4.1276e-12	IR	In vs Post
APLP2	9:56846622-56846628	-0.0718336	1.73735e-05	0.00156415	A5SS	In vs Post
APLP2	9:56846622-56846647	0.136201	5.99031e-12	1.24446e-09	IR	Pre vs In
APLP2	9:56846622-56846628	-0.0718336	0.00014175	0.00638267	A5SS	Pre vs Post
APOE	6:51374592-51374709	-0.00104773	3.01672e-05	0.0015215	IR	Pre vs In
APOE	6:51374592-51374709	-0.000838923	6.62145e-05	0.00337694	IR	Pre vs Post
ARFGEF3	1:26196155-26196269	-0.0491511	0.000152881	0.00897925	Cassette	In vs Post
ARFGEF3	1:26196155-26196269	0.0464311	0.000543432	0.016019	Cassette	Pre vs In
ARHGAP12	10:42476010-42476132	0.131198	4.23147e-10	6.92268e-08	Cassette	Pre vs In
ARHGAP12	10:42476010-42476132	0.101181	2.80362e-06	0.00022519	Cassette	Pre vs Post
ARHGAP12	10:42497958-42498047	0.0579634	0.000762423	0.023204	Cassette_multi	Pre vs Post
ARHGAP21	10:50567255-50567335	-0.0467665	0.00149376	0.0478646	AltStart	In vs Post
ARHGAP32	9:56132387-56132486	0.119685	0.000144088	0.00558763	Cassette	Pre vs In
ARHGAP32	9:56129636-56129716	-0.0930233	0.000460099	0.0140696	AltStart	Pre vs In
ARHGAP32	9:56044614-56044655	0.0934397	0.000498501	0.0149545	Cassette	Pre vs In
ARHGAP32	9:56044614-56044655	0.0894401	0.00141357	0.0361513	Cassette	Pre vs Post
ARHGAP39	4:268741-268833	-0.508576	3.45621e-06	0.000426959	Cassette	In vs Post
ARHGEF10L	6:76170383-76170397	0.202703	1.1412e-05	0.000675837	Cassette	Pre vs In
ARHGEF10L	6:76170383-76170397	0.202703	2.72732e-05	0.00159185	Cassette	Pre vs Post
ARHGEF11	4:93130166-93130240	-0.0962567	4.04264e-06	0.000478116	Cassette	In vs Post
ARHGEF11	4:93130166-93130240	0.102984	4.44629e-08	5.06027e-06	Cassette	Pre vs In
ARHGEF11	4:93104484-93104516	0.200354	1.47184e-05	0.000832114	Cassette	Pre vs In
ARHGEF12	9:47539811-47539867	0.100148	0.000768869	0.0233342	Cassette	Pre vs Post
ARHGEF2	4:94054656-94054792	-0.351815	0.00028395	0.0143611	AltStart	In vs Post
ARHGEF2	4:94054656-94054792	0.370648	1.42399e-05	0.00081208	AltStart	Pre vs In
ARHGEF28	2:83000484-83000570	0.29782	1.01623e-05	0.000612921	Cassette	Pre vs In
ARHGEF28	2:83000484-83000570	0.221111	0.000839466	0.0247181	Cassette	Pre vs Post
ARHGEF4	15:57360748-57361089	-0.16269	0.00142253	0.0363452	AltStart	Pre vs Post
ARHGEF40	7:78067426-78067506	0.524917	1.24966e-08	3.15679e-06	AltStart	In vs Post
ARHGEF40	7:78067426-78067506	-0.362579	0.000292821	0.00972701	AltStart	Pre vs In
ARHGEF40	7:78066530-78066610	0.333333	0.000546986	0.0182086	AltStart	Pre vs Post
ARHGEF7	11:77427100-77427279	0.276961	1.84086e-06	0.000250772	IR	In vs Post
ARHGEF7	11:77478225-77478295	-0.10084	0.000732031	0.0197951	Cassette	Pre vs In
ARHGEF9	X:50302756-50302767	0.184441	0.00158118	0.0392531	A5SS	Pre vs Post
ARID4B	14:56039348-56039599	-0.0791114	0.00261531	0.0499331	Cassette	Pre vs In
ARID5B	14:65552197-65552277	-0.149531	0.000817336	0.0243018	AltStart	Pre vs Post
ARL14EP	2:30309992-30310077	0.091156	5.83856e-06	0.000433192	Cassette	Pre vs Post
ARL6	13:162554122-162554280	-0.148618	0.00204883	0.0469159	Cassette	Pre vs Post
ARMCX2	X:83218070-83218106	0.148836	0.00210968	0.0480163	A5SS	Pre vs Post
ARMT1	1:14794873-14794961	0.189964	0.000198615	0.00851	Cassette	Pre vs Post
ARNT2	7:49292254-49292705	-0.16382	9.4688e-05	0.00626892	AltStart	In vs Post
ARNT2	7:49292254-49292705	0.205024	8.93939e-08	9.55092e-06	AltStart	Pre vs In
ARNTL2	5:46410095-46410187	-0.0935773	0.000810772	0.0316274	Cassette	In vs Post
ARPC4	13:66092287-66094022	-0.00291758	5.24297e-05	0.00388262	AltEnd	In vs Post
ARPC4	13:66083707-66083787	0.0319745	0.000396369	0.0143003	AltStart	Pre vs Post
ARPP21	13:20981516-20985222	0.578741	5.04941e-23	4.69216e-20	A3SS	In vs Post
ARPP21	13:20977126-20977206	0.494939	1.19499e-18	7.97242e-16	AltStart	In vs Post
ARPP21	13:21037317-21037397	0.307692	0.00123365	0.0416726	AltStart	In vs Post
ARPP21	13:20935156-20935604	-0.223577	0.00128761	0.0429791	AltStart	In vs Post
ARPP21	13:20981516-20985222	-0.636752	1.27473e-31	1.45076e-28	A3SS	Pre vs In
ARPP21	13:20977126-20977206	-0.577911	1.41236e-28	1.21588e-25	AltStart	Pre vs In
ARPP21	13:21010865-21010924	-0.313492	3.94907e-07	3.57289e-05	Cassette	Pre vs In
ARPP21	13:21037317-21037397	-0.287692	0.000630313	0.0177029	AltStart	Pre vs In
ARPP21	13:21032027-21032122	0.134328	0.00153601	0.0344641	Cassette	Pre vs In
ARPP21	13:21037489-21037811	-0.287692	0.00201893	0.041645	A3SS	Pre vs In
ARPP21	13:21010865-21010924	-0.223771	0.000281786	0.0111295	Cassette	Pre vs Post
ARRB1	9:9549730-9549785	-0.126608	8.0276e-06	0.000848078	AltStart	In vs Post
ARRB1	9:9529096-9529119	0.117074	3.59116e-06	0.000276604	Cassette	Pre vs Post
ARRB1	9:9549730-9549785	-0.125054	1.57028e-05	0.000998629	AltStart	Pre vs Post
ARVCF	14:51409518-51409535	-0.241627	2.38488e-05	0.00125103	Cassette	Pre vs In
ASAP1	4:10182867-10182947	0.225466	0.000478277	0.016457	AltStart	Pre vs Post
ASCC1	14:75082166-75082184	0.332722	0.000281813	0.00938652	Cassette	Pre vs In
ASCC1	14:75088275-75092735	0.0176368	0.00172751	0.0416154	MXE	Pre vs Post
ASCC3	1:67634868-67634874	0.188159	0.000399709	0.0125453	A3SS	Pre vs In
ASCC3	1:67634868-67634874	0.160014	0.00148796	0.037506	A3SS	Pre vs Post
ASNSD1	15:94265666-94265741	-0.0886616	0.00171016	0.0373665	Cassette	Pre vs In
ATG10	2:90580651-90580789	0.0705882	0.000734179	0.0227128	Cassette	Pre vs Post
ATG5	1:72520110-72520127	0.0840336	0.000360915	0.0115922	A5SS	Pre vs In
ATL1	1:180403178-180403192	-0.849286	2.19181e-29	4.07348e-26	Cassette	In vs Post
ATL1	1:180403178-180403192	-0.856124	4.83056e-40	7.04859e-37	Cassette	Pre vs Post
ATL2	3:102027277-102027291	-0.137542	4.84028e-05	0.00366103	Cassette	In vs Post
ATL2	3:102027277-102027291	0.136104	5.3602e-05	0.00250551	Cassette	Pre vs In
ATM	9:36704847-36704934	-0.0207547	0.00150364	0.048063	Cassette	In vs Post
ATP10A	1:141627291-141627480	0.318783	0.00209563	0.0477793	Cassette	Pre vs Post
ATP11A	11:78386424-78386447	0.128998	4.63521e-05	0.00220602	Cassette	Pre vs In
ATP11A	11:78395841-78395927	0.203159	0.000636582	0.0178025	MXE	Pre vs In
ATP11A	11:78386424-78386447	0.139813	0.000299793	0.0116999	Cassette	Pre vs Post
ATP11C	X:114400839-114400929	0.266667	0.00219788	0.0440952	Cassette	Pre vs In
ATP13A2	6:75628253-75628280	0.135971	0.000900485	0.034207	A3SS	In vs Post
ATP13A2	6:75631076-75631103	-0.203125	0.00147625	0.0373183	A3SS	Pre vs Post
ATP1A2	4:90342836-90343526	0.00134771	9.38908e-32	2.44295e-28	IR	In vs Post
ATP1A2	4:90350103-90350271	-0.0596099	4.14272e-07	7.23419e-05	Cassette	In vs Post
ATP1A2	4:90342836-90343526	-0.00928804	1.20231e-21	6.99369e-19	IR	Pre vs In
ATP1A2	4:90350103-90350271	0.0596099	2.2534e-07	2.14491e-05	Cassette	Pre vs In
ATP1A2	4:90342836-90343526	-0.00794033	0.000995013	0.0280408	IR	Pre vs Post
ATP2A2	14:31742258-31744174	-0.133667	0.000170272	0.006331	IR	Pre vs In
ATP2B1	5:93049502-93049567	0.416026	4.77474e-06	0.000322623	A5SS	Pre vs In
ATP2B2	13:66583381-66583422	-0.0963451	0.000420761	0.0193766	Cassette_multi	In vs Post
ATP2B2	13:66538592-66538763	0.187056	2.44444e-06	0.000178233	Cassette_multi	Pre vs In
ATP2B3	X:124327460-124327501	0.222126	1.69984e-07	1.66648e-05	Cassette	Pre vs In
ATP2C1	13:1579809-1579889	0.268601	2.32201e-17	1.3731e-14	AltStart	In vs Post
ATP2C1	13:1579404-1579889	0.118916	3.05859e-08	7.36864e-06	AltStart	In vs Post
ATP2C1	13:1579809-1579889	-0.262573	2.52321e-15	8.69046e-13	AltStart	Pre vs In
ATP2C1	13:1579404-1579889	-0.0902387	2.14546e-06	0.000158643	AltStart	Pre vs In
ATP8A1	8:33568484-33568585	-0.145412	2.74244e-05	0.00140482	Cassette	Pre vs In
ATP8A1	8:33542064-33542108	-0.106522	0.000555487	0.0162463	Cassette	Pre vs In
ATP8A1	8:33568484-33568585	-0.188641	3.48148e-08	4.71346e-06	Cassette_multi	Pre vs Post
ATP8A2	11:3391750-3391861	0.0421156	6.32827e-05	0.00286544	Cassette	Pre vs In
ATP8B4	1:121702029-121702109	-0.205882	0.000980101	0.0245504	AltStart	Pre vs In
ATP9A	17:53071662-53072002	0.16731	1.62422e-05	0.00147764	A5SS	In vs Post
ATP9A	17:53071662-53072002	-0.034632	3.75719e-05	0.00182804	A5SS	Pre vs In
ATXN10	5:3750906-3751064	-0.272727	0.00246231	0.0474971	MXE	Pre vs In
ATXN2	14:32713296-32713541	0.19165	0.000395827	0.0124683	Cassette	Pre vs In
ATXN2	14:32713296-32713541	0.178499	0.000962326	0.0274734	Cassette	Pre vs Post
AVP	17:32583029-32583109	-0.00221764	0.000450627	0.0201458	IR	In vs Post
AVP	17:32583029-32583109	0.00298621	0.000126569	0.00504363	IR	Pre vs In
AVP	17:32582606-32582620	0.46789	0.000858084	0.0220778	A5SS	Pre vs In
AVP	17:32583025-32583100	0.00296261	8.31245e-07	7.66057e-05	IR	Pre vs Post
AXIN1	3:41344877-41344957	-0.575758	9.47621e-07	7.72739e-05	AltStart	Pre vs In
BAG2	7:28679783-28679863	-0.135222	0.000515566	0.0174277	AltStart	Pre vs Post
BAIAP2	12:1615501-1615873	0.446759	0.00157868	0.0493971	AltEnd	In vs Post
BAIAP3	3:40534504-40534723	0.0133814	0.000347559	0.0128754	Cassette	Pre vs Post
BAP1	13:34551918-34552050	0.0221347	0.00214712	0.0434	Cassette	Pre vs In
BAP1	13:34551918-34552050	0.0347415	0.000122865	0.00566149	Cassette	Pre vs Post
BBX	13:151740842-151740931	-0.209041	2.27686e-07	2.15939e-05	Cassette	Pre vs In
BBX	13:151740842-151740931	-0.238766	7.12571e-12	1.70142e-09	Cassette	Pre vs Post
BCAS1	17:54942992-54943162	0.177759	2.943e-06	0.000377212	MXE	In vs Post
BCAS1	17:54942992-54943162	-0.136453	0.000360929	0.0115922	MXE	Pre vs In
BCAS4	17:52273475-52273583	0.0593472	0.000121016	0.004896	Cassette	Pre vs In
BCAT1	5:48873405-48873485	-0.0543933	3.88687e-06	0.000266342	AltEnd	Pre vs In
BCOR	X:35787693-35787746	-0.427083	0.000389331	0.0184145	Cassette	In vs Post
BCOR	X:35787693-35787746	0.596045	1.84017e-08	2.27209e-06	Cassette	Pre vs In
BCR	14:49314639-49314698	-0.0185532	0.0010085	0.0250697	Cassette	Pre vs In
BDNF	2:32644447-32644805	0.435484	0.000995645	0.024791	AltStart	Pre vs In
BEGAIN	7:121418260-121418340	-0.305789	0.000474664	0.0210397	AltStart	In vs Post
BEST1	2:9537689-9537724	-1.42729e-05	2.31453e-06	0.000169706	IR	Pre vs In
BEX5	X:83608380-83608438	0.137224	0.00189179	0.0442456	Cassette	Pre vs Post
BFSP2	13:74635945-74636025	-0.433333	0.000484045	0.0146648	AltStart	Pre vs In
BICC1	14:62525707-62525894	-0.105263	0.000403696	0.012625	A3SS	Pre vs In
BICDL1	14:40099493-40099504	0.91954	5.88969e-15	2.78625e-12	Cassette	In vs Post
BICDL1	14:40099493-40099504	-0.656382	1.16208e-07	1.19289e-05	Cassette	Pre vs In
BIN1	15:25361800-25361892	0.157771	5.31926e-07	8.75961e-05	Cassette	In vs Post
BIRC6	3:107175739-107175870	0.114553	0.00167936	0.0368783	Cassette	Pre vs In
BMPR2	15:106136824-106136864	0.00830369	3.00732e-05	0.00173598	IR	Pre vs Post
BNIP2	1:112362302-112362337	0.185714	0.00184152	0.0393498	Cassette	Pre vs In
BPNT1	10:9668072-9668116	-0.138757	4.0852e-05	0.00321127	Cassette	In vs Post
BPTF	12:14242433-14242606	0.128369	0.000607151	0.0253683	Cassette	In vs Post
BRD4	2:62308893-62309023	0.246903	0.000102229	0.00426107	Cassette	Pre vs In
BRD8	2:140187593-140187651	0.105302	0.00050467	0.0220689	Cassette	In vs Post
BRINP3	10:2962460-2962597	-0.302926	0.00262005	0.0499872	Cassette	Pre vs In
BRSK2	2:948604-948698	0.241026	0.00160783	0.0498687	Cassette	In vs Post
BSCL2	2:9063875-9064024	-0.432927	1.09084e-09	1.66982e-07	IR	Pre vs In
BSCL2	2:9063875-9064024	-0.432927	3.41814e-06	0.000264657	IR	Pre vs Post
BST2	2:60308314-60308927	0.216811	0.000664512	0.0273143	IR	In vs Post
BTBD9	7:34086798-34086946	0.164002	9.71125e-10	1.4953e-07	Cassette	Pre vs In
BTBD9	7:34086798-34086946	0.162444	9.65564e-11	1.93592e-08	Cassette	Pre vs Post
BTRC	14:112495835-112495912	-0.0776312	0.000947959	0.0272189	Cassette_multi	Pre vs Post
C19orf24	2:77189159-77189248	-0.306731	7.29098e-05	0.00321836	Cassette	Pre vs In
C1orf123	6:159011548-159011629	-0.044181	6.63359e-07	5.63769e-05	Cassette	Pre vs In
C1orf35	2:51239302-51239427	-0.0494363	0.000132323	0.00522426	Cassette	Pre vs In
C1orf53	10:20732726-20733041	0.238889	2.85733e-05	0.00239822	AltStart	In vs Post
C1S	5:63679785-63679811	-0.213204	0.00126724	0.0425999	A3SS	In vs Post
C1S	5:63679785-63679811	-0.317029	6.28948e-05	0.00324545	A3SS	Pre vs Post
C20orf194	17:32335723-32335895	0.0909774	1.02924e-05	0.00061792	Cassette	Pre vs In
C20orf194	17:32293309-32293389	0.262852	3.2009e-05	0.00160204	AltStart	Pre vs In
C20orf194	17:32293309-32293389	0.277778	3.28184e-06	0.000258076	AltStart	Pre vs Post
C20orf27	17:31943559-31943649	0.0866183	7.98099e-09	1.03936e-06	Cassette	Pre vs In
C20orf27	17:31943559-31943649	0.0754346	3.72381e-06	0.000285982	Cassette	Pre vs Post
C20orf96	17:34893765-34893882	0.435185	1.32238e-06	0.000190761	Cassette	In vs Post
C20orf96	17:34893765-34893882	0.441686	3.37319e-07	3.57245e-05	Cassette	Pre vs Post
C2CD5	5:51083666-51083731	0.20541	1.58828e-09	2.36221e-07	Cassette	Pre vs In
C2CD5	5:51068236-51068360	0.252845	4.01277e-07	3.5972e-05	MXE	Pre vs In
C2CD5	5:51068236-51068360	0.213258	3.75788e-07	3.88585e-05	Cassette	Pre vs Post
C2CD5	5:51083666-51083731	0.166555	4.6536e-07	4.64741e-05	Cassette	Pre vs Post
C2CD5	5:51130543-51130618	-0.0688725	0.000792739	0.0236911	Cassette	Pre vs Post
C2orf80	15:111295336-111295416	0.163099	0.000573482	0.0165872	AltEnd	Pre vs In
C5orf30	2:108740979-108741065	0.0212766	0.00116951	0.0312802	Cassette_multi	Pre vs Post
C6orf106	7:30571619-30571699	0.0667038	0.000246555	0.0128271	AltEnd	In vs Post
C6orf62	7:19522502-19523826	0.122664	0.00225768	0.0447365	A5SS	Pre vs In
C9orf3	10:27161101-27161181	0.305556	0.000338342	0.016673	AltStart	In vs Post
CACHD1	6:147899009-147899089	0.0709204	0.000388824	0.0123368	AltStart	Pre vs In
CACNA1A	2:65848939-65849035	0.381278	7.16927e-09	9.43029e-07	MXE	Pre vs In
CACNA1A	2:65848939-65849035	0.360215	2.78137e-07	3.0566e-05	MXE	Pre vs Post
CACNA1C	5:69406215-69406298	-0.409664	0.00084098	0.024735	MXE	Pre vs Post
CACNA1E	9:123293003-123293099	0.309925	5.27825e-14	1.45435e-11	MXE	Pre vs In
CACNA1E	9:123242682-123242738	-0.353552	1.33177e-12	2.95427e-10	Cassette	Pre vs In
CACNA1E	9:123293003-123293099	0.29858	1.73279e-10	3.32203e-08	MXE	Pre vs Post
CACNA1E	9:123242682-123242738	-0.251926	6.3579e-06	0.000465154	Cassette	Pre vs Post
CACNA1G	12:26894910-26894963	-0.29608	8.34811e-06	0.00051905	Cassette	Pre vs In
CACNA1G	12:26893105-26893126	0.496852	1.35397e-05	0.000780651	A5SS	Pre vs In
CACNA1G	12:26893105-26893126	0.491925	2.61601e-06	0.000211414	A5SS	Pre vs Post
CACNA1G	12:26894910-26894963	-0.300285	2.66178e-05	0.00155705	Cassette	Pre vs Post
CACNA1G	12:26904742-26907213	-0.362898	0.000211858	0.00887474	Cassette_multi	Pre vs Post
CACNA1H	3:40645288-40645305	0.362672	0.000247761	0.00855591	Cassette	Pre vs In
CACNB2	10:44844907-44845040	0.171597	0.000494732	0.0169415	MXE	Pre vs Post
CACNB3	5:14889870-14890303	-0.0342157	0.000112013	0.00527245	IR	Pre vs Post
CACNB4	15:417472-417491	0.0355969	0.00223532	0.0499241	Cassette	Pre vs Post
CACUL1	14:128729978-128730113	-0.151762	0.000159764	0.00929954	Cassette	In vs Post
CACUL1	14:128729978-128730113	0.189398	3.11716e-06	0.00022111	Cassette	Pre vs In
CADM1	9:42661528-42661581	0.158935	4.1663e-06	0.000490511	Cassette	In vs Post
CADM1	9:42669051-42669083	0.131902	6.74619e-08	7.38863e-06	Cassette_multi	Pre vs In
CADM1	9:42669051-42669083	0.148437	1.82362e-09	2.99359e-07	Cassette_multi	Pre vs Post
CADM1	9:42661528-42661581	0.166899	2.22325e-06	0.000183628	Cassette	Pre vs Post
CADPS2	18:24772714-24772722	0.592593	1.84052e-21	1.33024e-18	Cassette	In vs Post
CADPS2	18:24711473-24711481	-0.529801	1.59868e-12	6.3994e-10	Cassette	In vs Post
CADPS2	18:24772714-24772722	-0.592593	3.89574e-15	1.25895e-12	Cassette	Pre vs In
CADPS2	18:24711473-24711481	-0.529801	5.30104e-09	8.33724e-07	Cassette	Pre vs Post
CALCRL	15:92313249-92313316	-0.124164	0.000825022	0.0319914	Cassette	In vs Post
CALD1	18:14275119-14275231	-0.170309	3.4792e-05	0.00196518	Cassette	Pre vs Post
CALM1	7:112168697-112168929	0.00135999	1.95886e-10	6.21555e-08	IR	In vs Post
CALM1	7:112169966-112170026	0.00119517	2.88696e-10	4.81332e-08	IR	Pre vs In
CALM1	7:112168697-112168929	0.00109744	3.63684e-08	4.89854e-06	IR	Pre vs Post
CALU	18:19856996-19857189	0.138444	5.3358e-06	0.000614302	MXE	In vs Post
CALU	18:19856996-19857189	-0.140933	0.000186988	0.00686812	MXE	Pre vs In
CAMK2A	2:151265591-151265623	-0.30696	1.22553e-25	1.32863e-22	Cassette	In vs Post
CAMK2A	2:151307463-151307543	-0.0259596	0.000393466	0.0184852	AltStart	In vs Post
CAMK2A	2:151265591-151265623	0.206325	9.71095e-12	1.98589e-09	Cassette	Pre vs In
CAMK2A	2:151265591-151265623	-0.100634	0.000252472	0.0102333	Cassette	Pre vs Post
CAMK2B	18:50945772-50945816	0.0786205	0.000133672	0.00820287	Cassette	In vs Post
CAMK2B	18:50939195-50939269	0.0989855	7.38957e-05	0.00371103	Cassette	Pre vs Post
CAMK2D	8:109173495-109173527	0.14929	9.57397e-15	3.3528e-12	Cassette	Pre vs Post
CAMK2D	8:109176811-109176870	0.0767524	0.000450067	0.0157614	Cassette_multi	Pre vs Post
CAMK2D	8:109219417-109219512	0.106194	0.00149668	0.0376175	Cassette	Pre vs Post
CAMK2G	14:76548703-76548735	0.151615	7.87807e-07	6.58838e-05	Cassette	Pre vs In
CAMK2N1	6:78732220-78732281	0.0517409	0.000226679	0.0120613	A5SS	In vs Post
CAMKK2	14:31360577-31360619	0.144557	3.95296e-05	0.00190909	Cassette	Pre vs In
CAMKV	13:32385375-32385486	0.0840468	0.000718683	0.0290363	IR	In vs Post
CAMKV	13:32385375-32385486	-0.0990101	6.44256e-06	0.000417427	IR	Pre vs In
CAMTA1	6:68458373-68458403	0.428236	2.40763e-29	2.42393e-26	Cassette_multi	Pre vs In
CAMTA1	6:68458373-68458403	0.408892	2.73787e-26	2.24719e-23	Cassette_multi	Pre vs Post
CAMTA2	12:51936335-51936421	0.0460342	0.00092116	0.0266164	Cassette	Pre vs Post
CAPRIN2	5:43043211-43043348	-0.0465858	0.00222431	0.0443481	AltStart	Pre vs In
CAPRIN2	5:43043211-43043348	-0.057971	0.000118641	0.00550547	AltStart	Pre vs Post
CAPS2	5:38582431-38582527	0.118468	0.000276997	0.0141041	Cassette	In vs Post
CAPS2	5:38614471-38614647	-0.159418	0.00153975	0.0345074	Cassette	Pre vs In
CARD19	3:42648755-42648814	0.105972	0.000661918	0.0182961	Cassette	Pre vs In
CARF	15:106428529-106428595	-0.122537	0.00160798	0.0498687	Cassette	In vs Post
CARF	15:106428529-106428595	0.162762	2.1702e-05	0.00115228	Cassette	Pre vs In
CARMIL1	7:20313129-20313146	0.154179	0.000314292	0.0120333	Cassette	Pre vs Post
CAST	2:103364735-103364851	0.0691713	0.000778676	0.0306975	MXE	In vs Post
CBL	9:46513706-46513843	-0.0341615	1.94042e-05	0.00171728	A5SS	In vs Post
CBR4	14:20623840-20623960	-0.0651346	0.00132323	0.0434263	Cassette	In vs Post
CBX6	5:9186773-9186802	0.0042735	0.000627854	0.0260544	IR	In vs Post
CC2D2A	8:10788290-10788370	0.258333	0.00164958	0.0363464	AltStart	Pre vs In
CCDC136	18:19798315-19798421	0.0359775	0.00201436	0.0416446	Cassette_multi	Pre vs In
CCDC148	15:65167557-65167636	-0.198055	0.00083044	0.0321536	Cassette	In vs Post
CCDC148	15:65167557-65167636	0.224561	0.00026259	0.00891512	Cassette	Pre vs In
CCDC15	9:52146455-52146460	-0.392857	7.11888e-05	0.00316911	Cassette	Pre vs In
CCDC150	15:100558554-100558634	-0.503106	0.000331503	0.0163669	AltEnd	In vs Post
CCDC150	15:100558554-100558634	0.446092	0.000778709	0.0207149	AltEnd	Pre vs In
CCDC157	14:47338765-47338895	-0.398084	0.000110223	0.00706423	Cassette	In vs Post
CCDC157	14:47338765-47338895	0.30404	0.00161699	0.0358698	Cassette	Pre vs In
CCDC158	8:72064214-72064339	-0.429326	0.00156516	0.0390889	A5SS	Pre vs Post
CCDC25	14:11480454-11480505	0.0654332	0.0013282	0.0310974	Cassette	Pre vs In
CCDC25	14:11480454-11480505	0.080222	4.02163e-05	0.00220979	Cassette	Pre vs Post
CCDC62	14:30051445-30051546	0.337413	0.000448429	0.015746	Cassette	Pre vs Post
CCDC88A	3:85928524-85928604	-0.0233139	0.000574917	0.0243232	Cassette	In vs Post
CCDC88A	3:85928524-85928604	-0.0394649	4.3249e-06	0.000327359	Cassette	Pre vs Post
CCDC9	6:53066169-53066403	0.432222	3.93513e-05	0.00313113	AltStart	In vs Post
CCNB1IP1	7:78561260-78561388	0.0962276	0.000177045	0.0100799	Cassette	In vs Post
CCNB1IP1	7:78561260-78561388	-0.0963965	0.000110369	0.00454963	Cassette	Pre vs In
CCNL1	13:96999297-96999369	0.134926	0.000862269	0.025248	Cassette	Pre vs Post
CCSER1	8:127985766-127985843	-0.620879	3.27416e-05	0.00162627	Cassette	Pre vs In
CCSER2	14:85610310-85610390	-0.0510379	1.65443e-05	0.000921409	AltStart	Pre vs In
CD83	7:10366860-10366909	0.172146	0.00176014	0.0419752	Cassette	Pre vs Post
CD84	4:89959282-89959344	0.220588	0.000332235	0.0124659	Cassette	Pre vs Post
CDC25C	2:140323929-140324009	0.525253	0.00125818	0.0331054	AltStart	Pre vs Post
CDC42BPA	10:14859185-14859342	0.168504	1.0125e-06	0.000154923	Cassette	In vs Post
CDC42BPA	10:14859185-14859342	0.167735	3.14027e-07	3.35281e-05	Cassette	Pre vs Post
CDC42BPA	10:14672023-14672103	0.0961039	0.000268959	0.0107228	AltEnd	Pre vs Post
CDC42SE2	2:133576971-133577079	0.119867	0.000125756	0.00502565	AltStart	Pre vs In
CDC42SE2	2:133576971-133577079	0.137622	2.38129e-06	0.000194843	AltStart	Pre vs Post
CDH13	6:4902554-4902634	-0.0775551	0.000197638	0.0108948	AltStart	In vs Post
CDH19	1:155682605-155682636	0.524943	2.98071e-11	6.47012e-09	Cassette	Pre vs Post
CDH19	1:155730859-155730939	0.234043	0.0010401	0.0290002	AltEnd	Pre vs Post
CDK19	1:76722000-76722095	0.111218	0.00061369	0.0173477	Cassette	Pre vs In
CDKL5	X:15067915-15068037	0.480502	2.40146e-14	6.83266e-12	Cassette	Pre vs In
CDKL5	X:15067915-15068037	0.499983	2.05069e-17	9.97435e-15	Cassette	Pre vs Post
CEBPZOS	3:102994215-102994286	-0.338448	0.000910365	0.0232485	AltStart	Pre vs In
CELF4	6:121069775-121069861	0.110138	6.57779e-05	0.00295842	Cassette	Pre vs In
CELF4	6:121065547-121065627	-0.477778	4.02753e-06	0.000306618	AltEnd	Pre vs Post
CELF4	6:121069775-121069861	0.110487	1.60547e-05	0.00101854	Cassette	Pre vs Post
CELF5	2:75363209-75363289	0.200533	4.41044e-05	0.00341557	AltStart	In vs Post
CEP104	6:65284501-65284516	-0.422238	6.47557e-06	0.000417499	A3SS	Pre vs In
CEP104	6:65284501-65284516	-0.288635	0.00130026	0.0340153	A3SS	Pre vs Post
CEP170	10:16117443-16117630	0.0790728	0.00138153	0.0319179	IR	Pre vs In
CEP192	6:96707004-96707084	-0.407407	0.0015231	0.0343399	AltStart	Pre vs In
CEP192	6:96718420-96718504	-0.0375582	0.00169591	0.0410913	Cassette	Pre vs Post
CEP63	13:75618985-75619031	-0.173307	1.14503e-05	0.00112425	Cassette	In vs Post
CEP68	3:76900987-76901117	-0.100955	0.0020936	0.0427473	AltStart	Pre vs In
CEP78	1:231086277-231086380	0.219578	0.000659727	0.0182548	Cassette	Pre vs In
CEP78	1:231086277-231086380	0.180401	0.00182996	0.0430293	Cassette	Pre vs Post
CEPT1	4:109182847-109182927	-0.252816	0.000402386	0.0126142	AltStart	Pre vs In
CEPT1	4:109183797-109183855	-0.168234	0.0021988	0.0493603	AltStart	Pre vs Post
CFAP54	5:86902356-86902461	-0.298701	0.0011227	0.0271163	Cassette	Pre vs In
CFLAR	15:104781836-104782006	0.0791367	6.04963e-05	0.00435379	Cassette	In vs Post
CFLAR	15:104781836-104782006	-0.0917874	9.74983e-06	0.000590767	Cassette	Pre vs In
CHCHD3	18:16271006-16271076	-0.037659	1.60879e-05	0.00146874	Cassette	In vs Post
CHCHD3	18:16271006-16271076	0.0336224	0.000719507	0.0195372	Cassette	Pre vs In
CHCHD6	13:73237766-73237839	0.0505799	0.00192617	0.0404664	Cassette	Pre vs In
CHD3	12:53168645-53168725	0.206226	0.000671227	0.0275034	AltEnd	In vs Post
CHD3	12:53139565-53139658	0.103459	0.000122155	0.00491927	AltStart	Pre vs In
CHIA	4:109041859-109041915	0.806452	8.66774e-08	9.29864e-06	Cassette	Pre vs In
CHIA	4:109043931-109044035	0.745098	2.46798e-05	0.00128841	A3SS	Pre vs In
CHIA	4:109046373-109046499	0.666667	0.000137201	0.00538052	AltStart	Pre vs In
CHIA	4:109041186-109041211	-0.625	0.000758035	0.0203511	A3SS	Pre vs In
CHIA	4:109043931-109044035	0.745098	1.08156e-05	0.000719172	A3SS	Pre vs Post
CHIA	4:109046373-109046499	0.666667	0.000930196	0.0268479	AltStart	Pre vs Post
CHL1	13:56804883-56805072	-0.0921544	1.32702e-06	0.000190761	AltStart	In vs Post
CHL1	13:56804883-56805072	0.045977	0.00122068	0.0291537	AltStart	Pre vs In
CHODL	13:182824037-182824199	0.32442	0.00111391	0.0269728	Cassette	Pre vs In
CHODL	13:182824012-182824115	0.389804	7.93637e-08	1.007e-05	Cassette	Pre vs Post
CHORDC1	9:23200233-23200997	-0.00763359	0.00133487	0.0347132	AltEnd	Pre vs Post
CHPF2	18:5979433-5979513	-0.151301	2.35046e-07	2.63824e-05	AltEnd	Pre vs Post
CHPT1	5:82512259-82512285	0.191493	2.63533e-13	6.44696e-11	Cassette	Pre vs In
CHPT1	5:82504349-82504438	0.146152	0.000803011	0.0210829	A5SS	Pre vs In
CHPT1	5:82512259-82512285	0.174887	7.33892e-12	1.72104e-09	Cassette	Pre vs Post
CHPT1	5:82497649-82501094	-0.0492766	0.000197709	0.008485	AltEnd	Pre vs Post
CIT	14:33074700-33074780	0.136339	0.000707098	0.0193204	AltStart	Pre vs In
CKAP5	2:15681163-15681243	-0.154201	0.000775417	0.0234365	AltStart	Pre vs Post
CLASP1	15:29979293-29979316	0.128099	6.90267e-06	0.000751466	Cassette	In vs Post
CLASP1	15:29979293-29979316	-0.188098	1.2897e-10	2.25062e-08	Cassette	Pre vs In
CLASP1	15:30008869-30008985	-0.249167	0.000506232	0.0151269	Cassette	Pre vs In
CLASP1	15:29961978-29962004	0.0975746	0.00242239	0.0468305	Cassette	Pre vs In
CLASP2	13:19380441-19380467	-0.201942	6.55854e-12	1.35178e-09	Cassette	Pre vs In
CLASP2	13:19380441-19380467	-0.249084	2.76098e-18	1.4219e-15	Cassette	Pre vs Post
CLCN3	14:20090908-20091121	0.126624	0.000600164	0.0252272	AltStart	In vs Post
CLDN11	13:109088916-109089075	0.00324256	6.47395e-16	3.30286e-13	IR	In vs Post
CLDN11	13:109088916-109089075	0.000980551	3.61689e-14	1.17281e-11	IR	Pre vs Post
CLEC5A	18:8005982-8006041	0.611842	0.000965415	0.0275316	Cassette	Pre vs Post
CLIP4	3:110140159-110140214	0.134482	0.000270389	0.00910216	A5SS	Pre vs In
CLK1	15:104558913-104559003	-0.120218	2.97289e-07	3.23995e-05	Cassette	Pre vs Post
CLK4	2:79729617-79729783	0.070896	0.000235621	0.00824546	A5SS	Pre vs In
CLK4	2:79729617-79729783	0.0755864	7.40399e-05	0.00371118	A5SS	Pre vs Post
CLOCK	8:54908157-54908190	-0.576389	5.62246e-05	0.00408633	MXE	In vs Post
CLOCK	8:54863704-54863784	0.0643952	0.000163085	0.00947168	AltStart	In vs Post
CLOCK	8:54909729-54909926	-0.180094	0.00141421	0.0324155	AltStart	Pre vs In
CLPX	1:163196059-163196100	-0.144112	7.47332e-06	0.000470861	Cassette	Pre vs In
CLSTN1	6:70114325-70114379	0.243576	2.60545e-16	1.01792e-13	Cassette	Pre vs In
CLSTN1	6:70114325-70114379	0.244578	2.33204e-16	1.02085e-13	Cassette	Pre vs Post
CLTA	1:236990637-236990690	0.208709	5.68931e-11	1.04142e-08	MXE	Pre vs In
CLTA	1:236989114-236989160	-0.0546096	6.17998e-06	0.000402406	Cassette	Pre vs In
CLTA	1:236990637-236990690	0.178995	3.30228e-08	4.56496e-06	MXE	Pre vs Post
CLTA	1:236989114-236989160	-0.0428948	0.000364062	0.0133362	Cassette	Pre vs Post
CLTC	12:35911681-35911701	0.117296	0.00012276	0.00493604	Cassette	Pre vs In
CLTC	12:35911681-35911701	0.0970845	0.00164795	0.0403946	Cassette	Pre vs Post
CNDP2	1:149583909-149584279	0.175993	5.404e-05	0.00396075	A5SS	In vs Post
CNIH1	1:183812698-183813003	0.107468	3.36342e-09	9.30987e-07	IR	In vs Post
CNIH1	1:183812698-183813003	0.107468	4.93425e-09	7.80712e-07	IR	Pre vs Post
CNKSR2	X:17711266-17711412	-0.193999	2.40235e-07	4.4331e-05	Cassette	In vs Post
CNKSR2	X:17711266-17711412	0.121719	0.00184786	0.0394532	Cassette	Pre vs In
CNN1	2:70184550-70184561	0.431034	0.00200493	0.0416446	Cassette	Pre vs In
CNNM1	14:110580542-110580604	0.322925	3.63145e-18	1.76031e-15	Cassette	Pre vs In
CNNM1	14:110580542-110580604	0.296032	5.13809e-14	1.62593e-11	Cassette	Pre vs Post
CNNM2	14:114028984-114029048	0.203136	2.98555e-06	0.000212942	Cassette	Pre vs In
CNNM2	14:114047410-114047475	0.214383	2.08736e-05	0.00126908	Cassette	Pre vs Post
CNOT7	17:4933453-4935106	-0.0146135	3.11239e-08	7.42946e-06	AltEnd	In vs Post
CNOT7	17:4933453-4935106	0.000565285	4.00784e-05	0.00220683	AltEnd	Pre vs Post
CNP	12:20765204-20765284	-0.0312632	0.00207197	0.0424714	AltStart	Pre vs In
CNTN2	9:65738271-65738395	0.140358	7.74577e-05	0.00338486	Cassette	Pre vs In
CNTNAP2	9:109809793-109809873	0.127191	3.98289e-05	0.0031573	AltStart	In vs Post
COBLL1	15:71434906-71435021	-0.162162	0.000537886	0.0159093	Cassette	Pre vs In
COG7	3:22754502-22754624	0.654762	0.000138735	0.00837531	MXE	In vs Post
COL2A1	5:78353553-78353558	-0.833333	0.000239063	0.0083325	A5SS	Pre vs In
COL2A1	5:78353121-78353142	0.746606	0.00224355	0.0445183	A3SS	Pre vs In
COMMD4	7:58278489-58278575	-0.0934869	9.81375e-06	0.000593267	A3SS	Pre vs In
COMMD4	7:58278689-58278707	0.0674404	0.00162905	0.0360762	A5SS	Pre vs In
COMMD6	11:47818275-47818378	0.892405	8.54466e-15	3.03278e-12	A5SS	Pre vs Post
COP1	9:118070617-118070644	0.0648626	0.000772908	0.0233876	Cassette	Pre vs Post
COPG2	18:18307158-18307238	0.0829874	0.00131318	0.0434233	AltStart	In vs Post
COPG2	18:18307158-18307238	-0.0836549	0.00128922	0.0303751	AltStart	Pre vs In
COQ2	8:135142197-135142277	0.0896226	1.72736e-05	0.000953912	AltStart	Pre vs In
CORO2B	1:166505140-166505252	-0.0921701	0.000873989	0.0254776	Cassette_multi	Pre vs Post
COX6A2	3:17119847-17119927	-0.0655821	0.00077849	0.0235024	AltEnd	Pre vs Post
COX6C	4:37074773-37075121	-0.0520765	6.52622e-07	0.000105469	A5SS	In vs Post
COX6C	4:37074773-37075121	-0.161671	0.000153237	0.00583861	A5SS	Pre vs In
CP	13:89404000-89404206	-0.179179	0.0021536	0.0434757	MXE	Pre vs In
CPEB2	8:10441528-10441551	0.076265	0.00221607	0.0495415	Cassette	Pre vs Post
CPEB3	14:103770414-103770494	0.0483209	0.000931202	0.0346128	AltStart	In vs Post
CPEB3	14:103765624-103765647	0.120341	0.00025285	0.00868583	Cassette	Pre vs In
CPLANE1	16:22424653-22424724	-0.165128	0.000994416	0.024791	Cassette	Pre vs In
CPLX2	2:81744760-81745040	0.0990865	0.00123339	0.0416726	AltStart	In vs Post
CPLX2	2:81744760-81745040	0.0648659	0.000636069	0.0203078	AltStart	Pre vs Post
CPNE1	17:38991207-38991303	-0.0787069	0.00104714	0.0371193	Cassette_multi	In vs Post
CPNE3	4:50325785-50325895	0.119359	0.000316048	0.0156932	Cassette	In vs Post
CPNE4	13:370426-370777	-0.391775	1.69337e-05	0.00106149	AltStart	Pre vs Post
CPNE6	7:75219588-75219668	-0.139713	2.09125e-07	2.01252e-05	AltStart	Pre vs In
CPNE6	7:75219588-75219655	-0.0857596	0.000556615	0.018459	Cassette	Pre vs Post
CPSF6	5:33548673-33548748	-0.124362	0.000789656	0.0236491	Cassette	Pre vs Post
CPT1C	6:54733574-54733627	-0.0548611	0.000445491	0.0200194	AltStart	In vs Post
CPXM2	14:133270596-133270601	0.557522	5.4638e-14	1.4898e-11	A5SS	Pre vs In
CPXM2	14:133269389-133269394	-0.567568	1.11687e-11	2.24886e-09	A3SS	Pre vs In
CPXM2	14:133270596-133270601	0.557522	1.14064e-15	4.53924e-13	A5SS	Pre vs Post
CPXM2	14:133269389-133269394	-0.567568	5.51e-13	1.62607e-10	A3SS	Pre vs Post
CRABP1	7:47608246-47608786	0.0861061	0.000547574	0.0161048	IR	Pre vs In
CRABP1	7:47608246-47608786	0.0982209	0.00169469	0.0410913	IR	Pre vs Post
CREB5	18:43854489-43854537	0.493333	0.00102917	0.0287873	A5SS	Pre vs Post
CREB5	18:43846552-43848017	0.493333	0.00104167	0.0290131	AltEnd	Pre vs Post
CRELD1	13:66211053-66211133	-0.130172	0.00191568	0.0446058	AltEnd	Pre vs Post
CRMP1	8:4738687-4738930	-0.272664	7.59724e-11	1.38101e-08	AltStart	Pre vs In
CRMP1	8:4738687-4738930	-0.296177	3.67657e-09	5.85242e-07	AltStart	Pre vs Post
CSDC2	5:6976921-6977007	0.100806	1.61077e-05	0.000900933	IR	Pre vs In
CSMD3	4:25126648-25126959	0.123711	0.000101667	0.00664644	MXE	In vs Post
CSMD3	4:25126945-25126959	0.139706	2.19864e-10	4.09555e-08	MXE	Pre vs Post
CSNK1D	12:792021-792084	0.194477	0.00144346	0.0367726	Cassette	Pre vs Post
CSNK1G3	2:127108499-127108594	0.1796	0.000169826	0.006331	Cassette	Pre vs In
CSNK1G3	2:127108499-127108594	0.195323	0.000100787	0.00483062	Cassette	Pre vs Post
CSPP1	4:67642172-67642214	0.394968	2.73414e-12	5.91478e-10	Cassette	Pre vs In
CSPP1	4:67641725-67641737	-0.139785	0.00146142	0.0332328	A3SS	Pre vs In
CSPP1	4:67642172-67642214	0.386125	5.43534e-12	1.3342e-09	Cassette	Pre vs Post
CSPP1	4:67641725-67641737	-0.139785	0.0015659	0.0390889	A3SS	Pre vs Post
CSRNP3	15:72141613-72141876	0.311892	3.89199e-14	1.0838e-11	AltStart	Pre vs In
CSRNP3	15:72141613-72141876	0.244101	6.81858e-11	1.38829e-08	AltStart	Pre vs Post
CST3	17:30474357-30474442	4.94925e-05	5.15619e-07	4.49895e-05	IR	Pre vs In
CST3	17:30474357-30474442	0.000268649	0.000220414	0.0091601	IR	Pre vs Post
CSTF1	17:56972496-56972574	0.21884	0.000996171	0.0362002	AltStart	In vs Post
CTNNA1	2:140807322-140807402	0.0733407	0.00140871	0.0360622	AltStart	Pre vs Post
CTNNA3	14:70838006-70838198	0.407368	0.00146803	0.0371964	MXE	Pre vs Post
CTNNB1	13:25164276-25164442	-0.059316	0.00102088	0.0253055	AltStart	Pre vs In
CTNND1	2:13169625-13169642	0.0952205	0.00196103	0.0409671	Cassette	Pre vs In
CTNND1	2:13169625-13169642	0.13997	3.36204e-06	0.000262809	Cassette	Pre vs Post
CTNND2	16:1479235-1479318	0.037037	3.72901e-05	0.0018177	Cassette	Pre vs In
CTNND2	16:1179376-1179424	0.166744	0.000608604	0.0172436	Cassette	Pre vs In
CTSB	14:15034512-15034628	0.45	4.7137e-09	6.39305e-07	AltStart	Pre vs In
CTSB	14:15034512-15034628	0.319565	3.0184e-05	0.00173856	AltStart	Pre vs Post
CTTN	2:3041963-3042073	-0.150392	0.000554639	0.0162463	Cassette	Pre vs In
CTTN	2:3041963-3042073	-0.283098	1.00664e-10	1.98793e-08	Cassette	Pre vs Post
CTTN	2:3040742-3040754	0.0454586	0.00144629	0.036809	A3SS	Pre vs Post
CUL4B	X:98682438-98682444	0.0692585	0.000806315	0.0211272	A5SS	Pre vs In
CUL5	9:36445947-36446046	0.0504807	0.00152159	0.0483359	Cassette	In vs Post
CUL5	9:36445947-36446046	-0.0561716	0.000374736	0.0120019	Cassette	Pre vs In
CXADR	13:182180359-182180447	0.262838	1.28669e-05	0.00124455	Cassette	In vs Post
CXCL12	14:91525791-91525871	0.31895	5.58967e-05	0.00291874	AltEnd	Pre vs Post
CXCL12	14:91523967-91524647	0.0183486	0.00054456	0.0181508	AltEnd	Pre vs Post
CYB561A3	2:10146019-10146126	0.166667	0.000340621	0.012672	Cassette	Pre vs Post
CYB561D2	13:32829379-32829487	-0.255972	0.000179809	0.00662911	Cassette	Pre vs In
CYB5B	6:17507820-17507900	0.857143	6.23597e-06	0.000698868	AltEnd	In vs Post
CYBC1	12:657542-657662	0.318858	2.28053e-06	0.00030274	A5SS	In vs Post
CYBC1	12:657542-657662	0.305573	1.85671e-05	0.00114745	A5SS	Pre vs Post
CYFIP2	16:65908582-65908662	-0.26774	1.29027e-14	3.97344e-12	AltEnd	Pre vs In
CYFIP2	16:65933398-65933472	0.121502	4.21494e-05	0.0020161	Cassette	Pre vs In
CYFIP2	16:65908582-65908662	-0.216932	4.67312e-12	1.15792e-09	AltEnd	Pre vs Post
CYFIP2	16:65933398-65933472	0.095361	0.00163831	0.0402905	Cassette	Pre vs Post
CYP20A1	15:106737725-106737805	0.0563927	0.000177512	0.00775766	AltStart	Pre vs Post
CYP2J34	6:152357292-152357514	0.29422	4.16573e-08	9.42506e-06	Cassette	In vs Post
CYP2J34	6:152462396-152462476	-0.445396	6.25193e-05	0.0028461	AltEnd	Pre vs In
CYP2J34	6:152357292-152357604	0.190036	0.000770703	0.0233478	Cassette	Pre vs Post
CYTH1	12:3402769-3402849	0.219538	0.00236136	0.0460933	AltStart	Pre vs In
DAAM2	7:35208615-35208695	0.0678407	8.41375e-06	0.00052112	AltStart	Pre vs In
DAAM2	7:35263300-35263598	0.00803219	0.000440412	0.0135626	Cassette	Pre vs In
DAAM2	7:35208615-35208695	0.066608	3.08985e-05	0.00177582	AltStart	Pre vs Post
DAB1	6:154936452-154936599	0.24	0.000138478	0.00837531	AltStart	In vs Post
DAB1	6:155298874-155298939	0.101631	0.000832562	0.0215988	Cassette_multi	Pre vs In
DAB1	6:155298874-155298939	0.170674	3.87482e-06	0.000296712	Cassette_multi	Pre vs Post
DAB2IP	1:261820813-261820893	-0.226794	4.71403e-05	0.00358638	AltStart	In vs Post
DAB2IP	1:261732472-261732552	-0.218254	0.00235349	0.0460082	AltStart	Pre vs In
DARS2	9:116110549-116110709	0.211111	0.000205853	0.00735118	Cassette	Pre vs In
DARS2	9:116110549-116110709	0.215909	9.69028e-05	0.00466145	Cassette	Pre vs Post
DBN1	2:80492633-80492770	-0.208595	2.92762e-05	0.00149383	Cassette	Pre vs In
DBNDD2	17:47724870-47725002	-0.327459	2.94988e-19	2.07441e-16	AltStart	In vs Post
DBNDD2	17:47724870-47725002	0.3334	2.07612e-19	1.06558e-16	AltStart	Pre vs In
DCAF1	13:33748015-33748068	-0.190452	5.01971e-07	8.48102e-05	Cassette	In vs Post
DCAF1	13:33748015-33748068	0.182428	5.02614e-06	0.000335623	Cassette	Pre vs In
DCAF6	4:83069288-83069628	0.0332606	9.18503e-07	0.000142253	AltStart	In vs Post
DCAF6	4:82972304-82972363	0.27085	1.10229e-05	0.00109887	Cassette	In vs Post
DCAF6	4:83026620-83026700	-0.0727493	0.00222452	0.0443481	AltEnd	Pre vs In
DCLK1	11:11885963-11890779	-0.038671	0.000833676	0.0246305	AltEnd	Pre vs Post
DCLK2	8:78749491-78749541	0.104826	3.32669e-06	0.000415535	Cassette	In vs Post
DCTN2	5:22807221-22807226	-0.0822267	0.000198914	0.00719474	Cassette	Pre vs In
DCTN6	15:54884914-54884967	-0.0719354	4.47792e-05	0.0034573	Cassette	In vs Post
DCTN6	15:54884914-54884967	-0.0671735	8.9073e-05	0.00435662	Cassette	Pre vs Post
DDHD1	1:182720060-182720080	-0.422222	1.71848e-10	5.52013e-08	MXE	In vs Post
DDHD1	1:182720060-182720080	0.252427	2.77809e-07	2.59645e-05	MXE	Pre vs In
DDHD1	1:182712965-182713066	0.093594	0.000408124	0.014664	Cassette	Pre vs Post
DDR1	7:23387031-23387141	-0.154092	3.97516e-06	0.000271681	Cassette	Pre vs In
DDR2	4:87911157-87911162	-0.0693315	0.000793077	0.0209905	AltStart	Pre vs In
DDX46	2:136996760-136996876	-0.164328	0.000653355	0.0181745	Cassette	Pre vs In
DDX46	2:136996760-136996876	-0.190937	0.000132819	0.00605642	Cassette	Pre vs Post
DDX55	14:29371567-29371659	-0.218503	0.000595765	0.0250837	Cassette	In vs Post
DDX55	14:29371567-29371659	0.25974	9.16788e-07	7.49933e-05	Cassette	Pre vs In
DDX58	10:33931533-33933451	-0.114111	2.17041e-12	8.42863e-10	AltEnd	In vs Post
DDX58	10:33931533-33933451	-0.0343306	1.71945e-05	0.00107018	AltEnd	Pre vs Post
DENND1B	10:20536025-20536074	0.0680994	0.00115728	0.031048	Cassette	Pre vs Post
DENND5A	9:295808-295879	-0.0775045	0.00125008	0.042132	Cassette	In vs Post
DENND6B	5:384004-384083	-0.0631498	0.000284252	0.0143611	Cassette	In vs Post
DENND6B	5:384004-384083	0.0586578	0.000463771	0.0141653	Cassette	Pre vs In
DENND6B	5:388075-388106	-0.126088	0.00179338	0.0385414	IR	Pre vs In
DEUP1	9:25773112-25773192	0.339825	0.000976092	0.0277158	AltEnd	Pre vs Post
DGAT1	4:453344-453424	0.151515	0.00115228	0.0310088	AltStart	Pre vs Post
DGKB	9:84291395-84291464	0.196338	2.00192e-06	0.00014887	AltStart	Pre vs In
DGKB	9:84131964-84131984	-0.150777	6.94114e-05	0.00309525	Cassette	Pre vs In
DGKB	9:84131964-84131984	-0.145627	3.76062e-05	0.00210154	Cassette	Pre vs Post
DGKE	12:33158230-33158310	-0.0393159	0.00160358	0.0396592	AltStart	Pre vs Post
DGKH	11:24792312-24792442	-0.216511	3.16267e-06	0.000223143	Cassette	Pre vs In
DGKH	11:24792312-24792442	-0.285839	9.20485e-09	1.38946e-06	Cassette	Pre vs Post
DGKZ	2:16166042-16166217	-0.326581	0.00119479	0.0409581	AltStart	In vs Post
DGKZ	2:16166042-16166217	-0.348551	0.000304198	0.0118017	AltStart	Pre vs Post
DHX30	13:30595933-30595983	-0.684211	1.46615e-06	0.000128791	MXE	Pre vs Post
DHX30	13:30604923-30605029	0.118106	0.000636873	0.0203078	Cassette	Pre vs Post
DHX38	6:14999942-15000025	-0.402414	9.62786e-06	0.000989715	Cassette	In vs Post
DHX38	6:14999942-15000025	0.312414	0.000211645	0.00753744	Cassette	Pre vs In
DIAPH2	X:79067324-79067432	0.0961397	0.000848176	0.032646	Cassette	In vs Post
DIRAS3	6:144578358-144578386	0.00013515	1.17052e-22	1.01519e-19	IR	In vs Post
DIRAS3	6:144578358-144578386	-0.000856646	3.61528e-10	6.50378e-08	IR	Pre vs Post
DIS3L2	15:132563756-132563829	-0.0614525	0.00169539	0.0410913	Cassette	Pre vs Post
DLC1	17:1611242-1611308	-0.666667	1.46124e-12	5.94064e-10	MXE	In vs Post
DLC1	17:1343765-1344098	0.156153	0.00106669	0.0375055	AltStart	In vs Post
DLC1	17:1561257-1561416	0.240343	0.00123485	0.0416726	Cassette	In vs Post
DLC1	17:1576857-1576991	0.587937	1.18459e-21	7.77831e-19	Cassette	Pre vs Post
DLC1	17:1611242-1611308	-0.617284	2.18613e-10	4.09555e-08	MXE	Pre vs Post
DLC1	17:1560537-1560850	-0.087293	0.000655626	0.0208223	AltStart	Pre vs Post
DLG1	13:132856812-132856841	0.152661	1.53664e-06	0.000217293	AltStart	In vs Post
DLG1	13:132945576-132945674	-0.136197	0.000407573	0.0127159	Cassette	Pre vs In
DLG1	13:132856812-132856841	0.218282	2.01277e-12	5.33995e-10	AltStart	Pre vs Post
DLG2	9:18521653-18521694	0.0564001	0.00100469	0.0363334	Cassette	In vs Post
DLG2	9:18496531-18496611	0.136128	3.67541e-08	4.29498e-06	AltStart	Pre vs In
DLG2	9:18495326-18495406	0.0353207	0.00175132	0.0379177	AltEnd	Pre vs In
DLG2	9:18495758-18495897	0.0216198	0.00188653	0.039992	AltStart	Pre vs In
DLG2	9:18496531-18496611	0.120868	1.70815e-05	0.00106567	AltStart	Pre vs Post
DLG4	12:52566302-52566382	0.0450591	0.00171321	0.0373709	AltStart	Pre vs In
DLGAP1	6:103090902-103090931	-0.240693	0.000424641	0.0131388	Cassette	Pre vs In
DLGAP1	6:102933759-102933872	0.213085	0.000163811	0.00725547	Cassette	Pre vs Post
DLGAP1	6:102878318-102878492	-0.150437	0.00158008	0.0392531	AltStart	Pre vs Post
DLGAP3	6:91179984-91180092	-0.312281	0.000556574	0.0162599	AltStart	Pre vs In
DLGAP4	17:39690302-39690352	0.214286	0.00179144	0.0424658	Cassette	Pre vs Post
DMAC2	6:49410195-49410238	-0.175838	0.000619763	0.0174816	AltStart	Pre vs In
DMAC2	6:49525726-49525747	0.138713	0.00118714	0.0284047	Cassette	Pre vs In
DMAC2	6:49518039-49518066	-0.0882353	0.00203675	0.0467208	A3SS	Pre vs Post
DMD	X:29218393-29218457	-0.0841121	8.64668e-06	0.00053006	Cassette	Pre vs In
DMD	X:27035809-27035840	-0.06	3.13333e-05	0.00157549	Cassette	Pre vs In
DMD	X:28309174-28309356	-0.164959	0.000203582	0.00729994	Cassette	Pre vs In
DMD	X:27035809-27035840	-0.0562121	0.000561236	0.0185653	Cassette	Pre vs Post
DMTF1	9:93461005-93461142	-0.138036	0.00128137	0.0428536	Cassette_multi	In vs Post
DMTF1	9:93461005-93461142	0.19569	3.27019e-05	0.00162627	Cassette_multi	Pre vs In
DMTN	14:6323195-6323280	-0.18553	3.30487e-09	4.60151e-07	AltStart	Pre vs In
DMTN	14:6344772-6344779	-0.144024	5.90784e-05	0.00270266	Cassette	Pre vs In
DMTN	14:6325265-6325455	-0.110242	0.000736289	0.0198896	AltStart	Pre vs In
DMTN	14:6323195-6323280	-0.154535	1.80776e-05	0.00111983	AltStart	Pre vs Post
DMXL1	2:123103325-123103387	0.270218	1.55949e-09	2.34604e-07	Cassette	Pre vs In
DMXL1	2:123077396-123077509	0.144936	1.80498e-09	2.66075e-07	Cassette	Pre vs In
DMXL1	2:123103325-123103387	0.219265	2.28449e-07	2.5863e-05	Cassette	Pre vs Post
DMXL1	2:123077396-123077509	0.0918462	0.000197626	0.008485	Cassette	Pre vs Post
DMXL2	1:120180028-120180075	-0.0321543	0.001143	0.0393904	A5SS	In vs Post
DNAAF4	1:116409671-116409737	0.187396	0.000463779	0.0161363	Cassette	Pre vs Post
DNAJB2	15:121326475-121327384	-0.0137333	2.14233e-06	0.000287326	AltEnd	In vs Post
DNAJB2	15:121326237-121326265	-0.121493	0.000255713	0.00876853	Cassette	Pre vs In
DNAJC16	6:74734503-74734687	0.121464	0.00226164	0.0447812	Cassette	Pre vs In
DNAJC5	17:62776618-62776687	-0.063265	0.000145286	0.0086901	Cassette	In vs Post
DNAJC5	17:62754695-62754717	-0.794643	7.67928e-11	1.3863e-08	A5SS	Pre vs In
DNAJC5	17:62754720-62754742	0.801802	7.72371e-09	1.01088e-06	A3SS	Pre vs In
DNAJC5	17:62776618-62776687	0.0636345	0.0001438	0.00558474	Cassette	Pre vs In
DNAJC5	17:62754695-62754717	-0.727273	2.14025e-06	0.000177892	A5SS	Pre vs Post
DNAJC5	17:62754720-62754742	0.761905	3.11052e-05	0.00178379	A3SS	Pre vs Post
DNAJC5	17:62755348-62755375	-0.0755343	0.0011076	0.0301151	AltStart	Pre vs Post
DNAJC6	6:147144925-147145143	-0.138198	7.36733e-07	0.000116884	AltStart	In vs Post
DNAJC6	6:147144925-147145143	0.210216	9.11759e-13	2.15011e-10	AltStart	Pre vs In
DNAJC6	6:147008669-147008702	-0.552273	0.00160414	0.0356149	IR	Pre vs In
DNAL1	7:97006621-97006697	-0.197641	0.000565825	0.016402	Cassette_multi	Pre vs In
DNAL1	7:96999655-96999859	-0.115929	0.0011036	0.0268224	A5SS	Pre vs In
DNM1	1:268685985-268685996	-0.037037	1.83137e-05	0.0016378	Cassette	In vs Post
DNM1	1:268674135-268674273	-0.155396	8.21879e-08	8.85572e-06	MXE	Pre vs In
DNM1	1:268699979-268700019	0.137582	0.00049757	0.0149534	Cassette	Pre vs In
DNM1	1:268674135-268674273	-0.15966	7.4269e-08	9.4693e-06	MXE	Pre vs Post
DNM1	1:268685985-268685996	-0.0306748	8.06251e-05	0.00400306	Cassette	Pre vs Post
DNM3	9:114707240-114707320	-0.171254	5.71508e-05	0.00413057	AltEnd	In vs Post
DNMT3A	3:113528926-113529167	0.115385	0.00171829	0.041499	AltStart	Pre vs Post
DOCK10	15:126501010-126501079	0.0754407	7.82687e-06	0.000838054	Cassette	In vs Post
DOCK10	15:126650352-126650513	-0.124498	0.00049394	0.0217092	AltStart	In vs Post
DOCK10	15:126679153-126679233	-0.0458716	0.000710582	0.0287537	AltStart	In vs Post
DOCK10	15:126463616-126463714	-0.196859	3.07644e-07	2.83552e-05	Cassette	Pre vs In
DOCK10	15:126559784-126559864	-0.0588261	0.000862033	0.0221221	AltEnd	Pre vs In
DOCK10	15:126439513-126439588	0.0894572	0.00208588	0.0426562	Cassette	Pre vs In
DOCK10	15:126501010-126501079	0.0743694	1.32416e-06	0.000117497	Cassette	Pre vs Post
DOCK10	15:126439513-126439588	0.0976315	0.00050357	0.0171493	Cassette	Pre vs Post
DOCK10	15:126612589-126612793	-0.163415	0.00158806	0.0393865	AltStart	Pre vs Post
DOCK10	15:126463616-126463714	-0.123562	0.00213026	0.0483614	Cassette	Pre vs Post
DOCK4	18:33818122-33818144	0.0338983	0.00151429	0.048287	AltStart	In vs Post
DOCK7	6:149945966-149945980	-0.258443	4.66233e-08	1.02338e-05	Cassette	In vs Post
DOCK7	6:149891045-149891137	-0.145238	0.000109637	0.00706103	Cassette	In vs Post
DOCK7	6:149953742-149953751	0.282479	0.000165859	0.00958998	A3SS	In vs Post
DOCK7	6:149945966-149945980	-0.314308	1.90807e-12	5.11382e-10	Cassette	Pre vs Post
DOCK7	6:149891045-149891137	-0.24122	7.82073e-11	1.58009e-08	Cassette	Pre vs Post
DOCK7	6:149953742-149953751	0.340753	3.39742e-07	3.58366e-05	A3SS	Pre vs Post
DOCK9	11:67766296-67766303	0.158291	4.51732e-15	2.17659e-12	Cassette	In vs Post
DOCK9	11:67985343-67985954	-0.163972	5.20903e-05	0.0038775	AltStart	In vs Post
DOCK9	11:67766296-67766303	-0.110404	1.42554e-06	0.000110399	Cassette	Pre vs In
DOCK9	11:67985343-67985954	0.0731383	0.000652508	0.0181703	AltStart	Pre vs In
DOCK9	11:67766296-67766303	0.0478873	0.000110558	0.00522956	Cassette	Pre vs Post
DOP1A	1:83027558-83027638	0.0965517	0.000713658	0.0194186	AltEnd	Pre vs In
DOP1A	1:83027558-83027638	0.0972222	0.000465672	0.0161427	AltEnd	Pre vs Post
DPCD	14:112636414-112636558	0.046828	0.000211752	0.00887474	MXE	Pre vs Post
DPP10	15:21366514-21366594	-0.0725042	0.000175673	0.0100237	AltStart	In vs Post
DPY19L3	6:42371562-42371577	-0.026738	0.0012755	0.0427669	A5SS	In vs Post
DPYSL2	14:10484143-10484161	0.722222	5.29756e-07	8.75961e-05	A3SS	In vs Post
DST	7:29053813-29053911	0.0794077	0.000313688	0.0102896	Cassette	Pre vs In
DST	7:29176357-29176388	-0.0241076	0.0013352	0.0311499	A3SS	Pre vs In
DST	7:29053813-29053911	0.0808253	0.000144584	0.00648039	Cassette	Pre vs Post
DST	7:29176357-29176388	-0.0241076	0.00140146	0.0359465	A3SS	Pre vs Post
DTHD1	8:28010890-28010970	0.466667	5.6627e-06	0.000421334	AltEnd	Pre vs Post
DTNA	6:118682615-118682623	-0.0940171	5.44449e-09	1.47563e-06	Cassette	In vs Post
DTNA	6:118682615-118682623	0.165242	1.74388e-15	6.08636e-13	Cassette	Pre vs In
DTNA	6:118561727-118561885	-0.137047	5.46409e-05	0.00254046	AltStart	Pre vs In
DTNA	6:118561727-118561885	-0.160684	2.38464e-05	0.00140432	AltStart	Pre vs Post
DTNBP1	7:11649786-11649866	0.129021	2.91537e-06	0.000232037	AltStart	Pre vs Post
DUSP26	AEMK02000697.1:202823-202904	0.10056	0.00118895	0.0408655	Cassette	In vs Post
DUSP26	AEMK02000697.1:202823-202904	-0.169192	4.27292e-07	3.79146e-05	Cassette	Pre vs In
DVL1	6:63619546-63619585	0.100722	7.1151e-06	0.000452051	Cassette	Pre vs In
DVL1	6:63619546-63619585	0.0823713	0.00133398	0.0347132	Cassette	Pre vs Post
DYDC1	14:82181792-82182116	0.54386	9.86364e-08	1.03691e-05	Cassette	Pre vs In
DYDC1	14:82183740-82183745	0.277778	0.00115509	0.0277901	A5SS	Pre vs In
DYDC1	14:82181792-82182116	0.54386	1.75161e-08	2.58461e-06	Cassette	Pre vs Post
DYDC1	14:82183740-82183745	0.277778	0.000977166	0.0277163	A5SS	Pre vs Post
DYNLL2	12:34349684-34349691	-1	9.3207e-134	8.08384e-130	MXE	In vs Post
DYNLL2	12:34352331-34352338	0.44898	1.47614e-22	1.23896e-19	A3SS	In vs Post
DYNLL2	12:34352331-34352338	-0.44898	1.08723e-52	3.5574e-49	A3SS	Pre vs In
DYNLL2	12:34349548-34349554	0.576807	1.59138e-41	3.47132e-38	A5SS	Pre vs In
DYNLL2	12:34349902-34349908	-0.0981319	0.00127532	0.0301017	Cassette	Pre vs In
DYNLL2	12:34349684-34349691	-1	8.44e-170	1.10838e-165	Cassette	Pre vs Post
EBP	X:42671081-42671141	0.149126	0.000297727	0.0116366	Cassette	Pre vs Post
ECEL1	15:132994818-132994886	-0.0317183	0.00127253	0.0427227	Cassette	In vs Post
ECHDC1	1:35889823-35889875	0.0874457	8.91135e-05	0.00380528	Cassette	Pre vs In
ECHDC3	10:60119919-60119947	-0.471154	0.0024701	0.0476121	IR	Pre vs In
EEF2	2:74751466-74751585	0.00528884	3.1073e-06	0.000221023	IR	Pre vs In
EEF2	2:74751466-74751585	0.00466516	9.63238e-06	0.000655426	IR	Pre vs Post
EFCAB14	6:164799660-164799704	-0.0866687	7.24654e-05	0.00504138	Cassette	In vs Post
EFCAB14	6:164799660-164799704	-0.0955337	2.72185e-07	3.01643e-05	Cassette	Pre vs Post
EFNA5	2:112772148-112772228	0.357143	0.00147008	0.047339	AltEnd	In vs Post
EIF2B2	7:98209851-98209867	0.152381	0.0019999	0.0415801	Cassette	Pre vs In
EIF2B2	7:98209851-98209867	0.155178	0.000661801	0.020993	Cassette	Pre vs Post
EIF2B4	3:111775459-111776331	-0.00188679	0.000132813	0.00816939	AltStart	In vs Post
EIF3F	9:1297566-1297972	-0.0214139	0.00187836	0.0398767	AltStart	Pre vs In
EIF4E3	13:53126853-53127021	-0.236842	0.000546768	0.0233986	Cassette	In vs Post
EIF4ENIF1	14:48204207-48204338	0.322152	6.2803e-05	0.00444041	AltStart	In vs Post
EIF4G1	13:122205715-122205735	0.275255	1.07621e-10	3.50022e-08	Cassette	In vs Post
EIF4G1	13:122205715-122205735	0.264331	6.48223e-09	9.93025e-07	Cassette	Pre vs Post
ELAVL4	6:161879855-161879935	-0.589286	0.00176431	0.0381359	AltStart	Pre vs In
ELF2	8:87819529-87819605	0.117534	0.000881035	0.0225655	Cassette	Pre vs In
ELF2	8:87819529-87819598	0.138974	1.18675e-05	0.000779252	Cassette	Pre vs Post
ELL2	2:102530180-102530260	0.0806452	0.000326712	0.0122938	AltEnd	Pre vs Post
ELMO1	18:36787368-36787448	-0.0258523	0.000165459	0.00619606	AltStart	Pre vs In
ELMOD1	9:36191173-36191196	0.0385799	7.58444e-06	0.000818836	Cassette	In vs Post
ELMOD1	9:36191173-36191196	0.081075	1.02925e-12	2.93839e-10	Cassette	Pre vs Post
ELMOD3	3:59400676-59400726	-0.0401606	0.00122388	0.0324372	AltStart	Pre vs Post
ELP1	1:249969190-249969303	0.0498915	0.000185084	0.00802184	Cassette	Pre vs Post
EMC2	4:29024670-29024825	0.112205	0.000571002	0.0241969	AltEnd	In vs Post
EMC7	7:80451353-80451433	-0.421053	7.12807e-07	0.000113782	AltEnd	In vs Post
EMC7	7:80451353-80451433	-0.421053	9.6183e-07	8.71119e-05	AltEnd	Pre vs Post
EMC9	7:75159582-75159624	-0.0908325	0.00109096	0.0298935	Cassette	Pre vs Post
EML2	6:52007059-52007116	0.0506597	0.00131484	0.0434233	A3SS	In vs Post
EML2	6:52011407-52011487	0.0501931	0.000955431	0.0273657	AltStart	Pre vs Post
ENDOV	12:2088686-2088766	0.345823	0.000911487	0.034274	AltEnd	In vs Post
ENOX2	X:107353458-107353479	-0.50303	0.000308008	0.0101414	AltStart	Pre vs In
ENOX2	X:107353458-107353479	-0.480383	1.69936e-05	0.00106271	AltStart	Pre vs Post
ENSSSCG00000000635	5:61426907-61426963	-0.0781893	2.20651e-05	0.00132618	Cassette	Pre vs Post
ENSSSCG00000000906	5:88639930-88640086	-0.52	0.00102232	0.0287179	AltStart	Pre vs Post
ENSSSCG00000001229	7:22869875-22869886	-0.997251	7.14023e-94	4.64454e-90	A5SS	In vs Post
ENSSSCG00000001229	7:22824947-22825103	0.509923	6.69602e-29	1.16149e-25	A5SS	In vs Post
ENSSSCG00000001229	7:22940107-22940165	0.703748	5.83172e-25	6.06942e-22	MXE	In vs Post
ENSSSCG00000001229	7:22889305-22889419	0.426502	3.76678e-22	3.06274e-19	A3SS	In vs Post
ENSSSCG00000001229	7:22869887-22870110	0.284219	1.01502e-17	6.1418e-15	Cassette	In vs Post
ENSSSCG00000001229	7:22890726-22890737	-0.316571	2.41708e-17	1.39756e-14	A5SS	In vs Post
ENSSSCG00000001229	7:22870301-22870340	0.450823	3.47982e-15	1.70833e-12	A5SS	In vs Post
ENSSSCG00000001229	7:22889800-22889915	-0.487805	2.51385e-13	1.07226e-10	MXE	In vs Post
ENSSSCG00000001229	7:22957789-22957888	0.224881	4.44859e-12	1.6775e-09	Cassette	In vs Post
ENSSSCG00000001229	7:22941376-22941512	0.21111	1.44254e-08	3.60899e-06	Cassette	In vs Post
ENSSSCG00000001229	7:22956420-22956489	0.0611844	1.88326e-07	3.55076e-05	A3SS	In vs Post
ENSSSCG00000001229	7:22938769-22938970	0.161201	2.92376e-07	5.31981e-05	A5SS	In vs Post
ENSSSCG00000001229	7:22957889-22957960	-0.288632	3.49368e-06	0.000428784	Cassette	In vs Post
ENSSSCG00000001229	7:22941002-22941034	0.195147	4.99939e-06	0.00058071	MXE	In vs Post
ENSSSCG00000001229	7:22826215-22826272	-0.135664	1.13402e-05	0.0011219	Cassette	In vs Post
ENSSSCG00000001229	7:22959220-22962547	-0.36732	1.35101e-05	0.00129712	AltEnd	In vs Post
ENSSSCG00000001229	7:22827331-22827381	0.125551	3.54484e-05	0.00286438	Cassette	In vs Post
ENSSSCG00000001229	7:22959263-22959343	0.0746622	8.79495e-05	0.00592839	AltEnd	In vs Post
ENSSSCG00000001229	7:22958710-22958742	0.0869867	0.000399019	0.0186393	Cassette_multi	In vs Post
ENSSSCG00000001229	7:22939196-22939437	0.102156	0.000513877	0.0223215	Cassette	In vs Post
ENSSSCG00000001229	7:22958873-22958923	0.0553763	0.000625245	0.0259876	Cassette_multi	In vs Post
ENSSSCG00000001229	7:22869875-22869886	0.997251	1.50608e-78	9.85578e-75	A5SS	Pre vs In
ENSSSCG00000001229	7:22940166-22940341	-1	3.57107e-62	1.55794e-58	MXE	Pre vs In
ENSSSCG00000001229	7:22869887-22869934	0.715781	9.08218e-51	2.6415e-47	Cassette	Pre vs In
ENSSSCG00000001229	7:22941376-22941512	0.325745	2.13212e-41	4.29311e-38	Cassette	Pre vs In
ENSSSCG00000001229	7:22889305-22889419	-0.577608	4.89424e-39	8.54078e-36	A3SS	Pre vs In
ENSSSCG00000001229	7:22870301-22870340	-0.653085	3.42869e-33	4.27378e-30	A5SS	Pre vs In
ENSSSCG00000001229	7:22957789-22958064	0.618588	1.43996e-28	1.21588e-25	MXE	Pre vs In
ENSSSCG00000001229	7:22890726-22890737	0.384201	9.3101e-24	6.41319e-21	A5SS	Pre vs In
ENSSSCG00000001229	7:22940066-22940106	0.29642	2.65382e-23	1.73666e-20	Cassette	Pre vs In
ENSSSCG00000001229	7:22938701-22938769	0.473584	2.56475e-17	1.13788e-14	MXE	Pre vs In
ENSSSCG00000001229	7:22824947-22825103	-0.364415	5.99918e-17	2.49261e-14	A5SS	Pre vs In
ENSSSCG00000001229	7:22826266-22826272	0.300975	4.61335e-16	1.75013e-13	A5SS	Pre vs In
ENSSSCG00000001229	7:22940460-22940570	-0.84056	2.55827e-15	8.69678e-13	MXE	Pre vs In
ENSSSCG00000001229	7:22940107-22940165	-0.459641	3.88893e-15	1.25895e-12	MXE	Pre vs In
ENSSSCG00000001229	7:22890786-22890961	-0.129426	1.49029e-14	4.48389e-12	Cassette	Pre vs In
ENSSSCG00000001229	7:22852856-22853031	0.795132	1.09812e-13	2.84597e-11	MXE	Pre vs In
ENSSSCG00000001229	7:22976358-22976438	0.206897	2.31955e-13	5.72798e-11	AltEnd	Pre vs In
ENSSSCG00000001229	7:22938303-22938383	0.0601458	3.10179e-13	7.51783e-11	AltStart	Pre vs In
ENSSSCG00000001229	7:22956916-22957191	0.346728	6.75433e-13	1.60728e-10	MXE	Pre vs In
ENSSSCG00000001229	7:22958873-22958923	0.0749881	1.0856e-10	1.92004e-08	Cassette_multi	Pre vs In
ENSSSCG00000001229	7:22941513-22941593	-0.00368048	2.47699e-10	4.18307e-08	AltEnd	Pre vs In
ENSSSCG00000001229	7:22919170-22919250	0.0456553	1.8646e-09	2.72669e-07	AltStart	Pre vs In
ENSSSCG00000001229	7:22871276-22871326	0.837143	2.34907e-08	2.80773e-06	A5SS	Pre vs In
ENSSSCG00000001229	7:22853630-22853680	0.0790221	1.24836e-07	1.26655e-05	Cassette	Pre vs In
ENSSSCG00000001229	7:22939312-22939401	0.269054	1.99073e-07	1.92997e-05	Cassette	Pre vs In
ENSSSCG00000001229	7:22941002-22941034	0.121519	1.68839e-06	0.000128475	MXE	Pre vs In
ENSSSCG00000001229	7:22891788-22896292	0.177445	4.21393e-06	0.000286503	Cassette	Pre vs In
ENSSSCG00000001229	7:22826663-22826720	0.0430435	5.90427e-06	0.000388317	A5SS	Pre vs In
ENSSSCG00000001229	7:22890042-22890075	0.0524567	1.06045e-05	0.000633751	MXE	Pre vs In
ENSSSCG00000001229	7:22959220-22959343	-0.143003	5.37645e-05	0.00250863	AltEnd	Pre vs In
ENSSSCG00000001229	7:22891625-22891657	0.0284152	5.49889e-05	0.00255211	Cassette	Pre vs In
ENSSSCG00000001229	7:22956159-22956239	0.0961889	0.000110789	0.00455979	AltStart	Pre vs In
ENSSSCG00000001229	7:22825445-22825571	-0.538922	0.000256049	0.00876853	A5SS	Pre vs In
ENSSSCG00000001229	7:22891152-22891190	0.0213693	0.000493173	0.0148503	Cassette	Pre vs In
ENSSSCG00000001229	7:22869887-22869934	1	2.12801e-112	1.11785e-108	Cassette	Pre vs Post
ENSSSCG00000001229	7:22941376-22941512	0.536855	7.49854e-77	2.81356e-73	Cassette	Pre vs Post
ENSSSCG00000001229	7:22827678-22827728	-0.390979	8.45167e-54	2.21983e-50	A5SS	Pre vs Post
ENSSSCG00000001229	7:22956650-22956689	0.443563	1.22067e-46	2.91462e-43	Cassette	Pre vs Post
ENSSSCG00000001229	7:22940166-22940341	-0.755271	1.33536e-38	1.67015e-35	MXE	Pre vs Post
ENSSSCG00000001229	7:22889800-22889898	0.247716	1.67875e-23	1.25978e-20	A3SS	Pre vs Post
ENSSSCG00000001229	7:22956916-22957191	0.495202	3.89482e-23	2.8416e-20	MXE	Pre vs Post
ENSSSCG00000001229	7:22941002-22941034	0.348806	7.49705e-21	4.68834e-18	MXE	Pre vs Post
ENSSSCG00000001229	7:22869835-22869886	-0.177541	1.0059e-16	4.55517e-14	MXE	Pre vs Post
ENSSSCG00000001229	7:22853630-22853680	0.10079	1.73001e-15	6.57946e-13	Cassette	Pre vs Post
ENSSSCG00000001229	7:22958873-22958923	0.0999518	3.1366e-15	1.14421e-12	Cassette_multi	Pre vs Post
ENSSSCG00000001229	7:22826266-22826272	0.264761	2.99446e-13	9.04018e-11	A5SS	Pre vs Post
ENSSSCG00000001229	7:22891080-22891190	-0.325422	5.60658e-13	1.63619e-10	MXE	Pre vs Post
ENSSSCG00000001229	7:22958710-22958746	0.115245	7.83139e-13	2.26035e-10	Cassette_multi	Pre vs Post
ENSSSCG00000001229	7:22920060-22920196	-0.00560731	1.55603e-12	4.21332e-10	Cassette	Pre vs Post
ENSSSCG00000001229	7:22938303-22938383	0.0339315	6.65063e-12	1.60256e-09	AltStart	Pre vs Post
ENSSSCG00000001229	7:22976358-22976438	0.201519	3.12659e-11	6.73113e-09	AltEnd	Pre vs Post
ENSSSCG00000001229	7:22939312-22939437	0.295469	4.81356e-11	1.0034e-08	Cassette	Pre vs Post
ENSSSCG00000001229	7:22852998-22853031	0.0940555	1.91385e-10	3.64255e-08	Cassette	Pre vs Post
ENSSSCG00000001229	7:22939196-22939294	0.0962779	3.49736e-10	6.33505e-08	A3SS	Pre vs Post
ENSSSCG00000001229	7:22941513-22945277	-0.00498084	4.64748e-10	8.30382e-08	AltEnd	Pre vs Post
ENSSSCG00000001229	7:22959220-22959300	-0.50915	2.08834e-08	3.0304e-06	AltEnd	Pre vs Post
ENSSSCG00000001229	7:22957789-22958004	-0.136418	3.00491e-08	4.19808e-06	MXE	Pre vs Post
ENSSSCG00000001229	7:22940107-22940124	-0.0999496	7.33462e-08	9.39726e-06	A3SS	Pre vs Post
ENSSSCG00000001229	7:22871276-22871326	0.754579	1.06189e-07	1.30995e-05	A5SS	Pre vs Post
ENSSSCG00000001229	7:22940066-22940106	-0.180506	1.06232e-07	1.30995e-05	MXE	Pre vs Post
ENSSSCG00000001229	7:22940460-22940570	-0.680128	1.74476e-07	2.02771e-05	MXE	Pre vs Post
ENSSSCG00000001229	7:22869000-22869790	0.945055	5.4415e-06	0.000406026	MXE	Pre vs Post
ENSSSCG00000001229	7:22938701-22938970	0.278736	1.49881e-05	0.0009625	MXE	Pre vs Post
ENSSSCG00000001229	7:22889305-22889419	-0.151106	3.87779e-05	0.00215784	A3SS	Pre vs Post
ENSSSCG00000001229	7:22956159-22956239	0.103608	4.72795e-05	0.00251886	AltStart	Pre vs Post
ENSSSCG00000001229	7:22826663-22826720	0.0347364	6.066e-05	0.00314247	A5SS	Pre vs Post
ENSSSCG00000001229	7:22891999-22892175	0.272059	9.42449e-05	0.00456705	A3SS	Pre vs Post
ENSSSCG00000001229	7:22827331-22827381	0.115999	0.000166679	0.00737007	Cassette	Pre vs Post
ENSSSCG00000001229	7:22824834-22824947	-0.0296391	0.000318278	0.0121166	Cassette	Pre vs Post
ENSSSCG00000001229	7:22976457-22976529	0.103622	0.000518158	0.0174928	A3SS	Pre vs Post
ENSSSCG00000001229	7:22825445-22825571	-0.447059	0.00138836	0.0357725	A5SS	Pre vs Post
ENSSSCG00000001341	7:23031994-23032236	-0.589286	2.52552e-07	4.62757e-05	MXE	In vs Post
ENSSSCG00000001341	7:23015355-23015415	-0.0834359	0.000101299	0.00663905	AltStart	In vs Post
ENSSSCG00000001341	7:23046583-23046804	0.12848	0.000393734	0.0184852	Cassette	In vs Post
ENSSSCG00000001341	7:23031994-23032236	0.531915	2.64623e-06	0.000192411	MXE	Pre vs In
ENSSSCG00000001341	7:23046583-23046804	-0.318757	0.000394818	0.0124515	Cassette	Pre vs In
ENSSSCG00000001341	7:23015355-23015415	-0.109525	3.09346e-06	0.000245467	AltStart	Pre vs Post
ENSSSCG00000001414	7:23781400-23781480	-0.259504	0.000777756	0.0306975	AltStart	In vs Post
ENSSSCG00000001414	7:23781400-23781480	0.24222	0.000612943	0.0173453	AltStart	Pre vs In
ENSSSCG00000001455	7:24887221-24887301	-0.251208	1.79644e-11	3.53561e-09	AltEnd	Pre vs In
ENSSSCG00000001455	7:24887221-24887301	-0.116999	1.52278e-06	0.000131999	AltEnd	Pre vs Post
ENSSSCG00000001528	7:30442323-30442650	0.082118	0.000448406	0.020081	A5SS	In vs Post
ENSSSCG00000001701	7:39245939-39246007	0.00217364	0.000743516	0.0296827	IR	In vs Post
ENSSSCG00000001850	7:55481297-55481372	-0.0540666	0.00197415	0.0411427	Cassette	Pre vs In
ENSSSCG00000001850	7:55481297-55481372	-0.0581818	0.000817212	0.0243018	Cassette	Pre vs Post
ENSSSCG00000002003	7:75159582-75159624	-0.0908325	0.000991635	0.0280057	Cassette	Pre vs Post
ENSSSCG00000002266	7:85999198-85999297	-0.0348837	0.00130179	0.0432032	Cassette	In vs Post
ENSSSCG00000002266	7:86045633-86045713	-0.0620347	0.000253509	0.0102595	AltStart	Pre vs Post
ENSSSCG00000002547	AEMK02000452.1:2212602-2212668	0.0722006	0.000209341	0.00882559	Cassette	Pre vs Post
ENSSSCG00000002547	AEMK02000452.1:2201608-2201635	-0.0987335	0.000357785	0.0131984	A5SS	Pre vs Post
ENSSSCG00000002743	6:14896031-14896082	-0.390588	0.00166773	0.0366537	A3SS	Pre vs In
ENSSSCG00000003322	6:60726640-60726720	0.384615	0.000795676	0.0209956	AltEnd	Pre vs In
ENSSSCG00000003322	6:60726640-60726720	0.408907	0.00219599	0.0493603	AltEnd	Pre vs Post
ENSSSCG00000003453	6:73137462-73137542	0.328283	0.00212471	0.0483165	AltStart	Pre vs Post
ENSSSCG00000003679	6:98525923-98525956	-0.137089	0.00103875	0.036973	Cassette	In vs Post
ENSSSCG00000003793	6:142752361-142752378	-0.108946	0.000268228	0.0107228	A3SS	Pre vs Post
ENSSSCG00000003793	6:142826811-142826951	-0.192446	0.000465437	0.0161427	Cassette	Pre vs Post
ENSSSCG00000003984	6:62118474-62118571	0.327343	3.37708e-07	3.09085e-05	Cassette	Pre vs In
ENSSSCG00000003984	6:62118474-62118571	0.190926	0.00190809	0.044508	Cassette	Pre vs Post
ENSSSCG00000004081	1:13841237-13841257	0.156184	0.00012482	0.00499586	Cassette	Pre vs In
ENSSSCG00000004081	1:13855410-13855460	-0.108571	0.00117981	0.028281	Cassette	Pre vs In
ENSSSCG00000004081	1:13855410-13855460	-0.127901	7.34981e-05	0.00369814	Cassette	Pre vs Post
ENSSSCG00000004082	1:14191923-14191981	-0.148231	0.000130994	0.00598359	Cassette	Pre vs Post
ENSSSCG00000004511	1:99439549-99439626	-0.284553	0.000899341	0.0261008	Cassette	Pre vs Post
ENSSSCG00000004666	1:126119501-126119576	0.265775	2.01592e-06	0.000149487	AltStart	Pre vs In
ENSSSCG00000004666	1:126119501-126119576	0.27584	1.38205e-07	1.64251e-05	AltStart	Pre vs Post
ENSSSCG00000005255	1:223584508-223584621	-0.0761421	0.000283993	0.00944574	AltStart	Pre vs In
ENSSSCG00000005643	1:268701896-268701921	-0.289086	1.06057e-05	0.00106957	IR	In vs Post
ENSSSCG00000005643	1:268701896-268701921	-0.177616	0.00108775	0.0298935	IR	Pre vs Post
ENSSSCG00000005738	1:272817705-272817813	0.149838	0.00171305	0.0373709	AltStart	Pre vs In
ENSSSCG00000005959	4:10585177-10585195	0.107429	2.96442e-05	0.00150673	Cassette	Pre vs In
ENSSSCG00000005959	4:10610388-10610506	-0.0320197	0.00220902	0.0442074	Cassette	Pre vs In
ENSSSCG00000005959	4:10608733-10608815	0.130001	0.000617495	0.0199	Cassette	Pre vs Post
ENSSSCG00000006149	4:51982341-51982514	0.161905	1.43807e-06	0.000126748	Cassette	Pre vs Post
ENSSSCG00000006179	4:62140255-62140269	0.130052	0.0008924	0.034046	Cassette	In vs Post
ENSSSCG00000006179	4:62140255-62140269	-0.16398	4.70596e-05	0.00223563	Cassette	Pre vs In
ENSSSCG00000006418	4:91386627-91386701	0.862069	5.97737e-06	0.000442241	Cassette	Pre vs Post
ENSSSCG00000006510	4:94164853-94164860	0.29085	7.86062e-06	0.000838219	Cassette	In vs Post
ENSSSCG00000006510	4:94164853-94164860	-0.448052	0.00191163	0.0403864	MXE	Pre vs In
ENSSSCG00000007001	17:99772-99841	0.574468	3.02345e-06	0.000383742	MXE	In vs Post
ENSSSCG00000007001	17:99772-99841	-0.574468	5.84954e-10	9.22395e-08	MXE	Pre vs In
ENSSSCG00000007001	17:92323-92381	0.0998152	6.63237e-07	5.63769e-05	Cassette	Pre vs In
ENSSSCG00000007001	17:58655-58727	0.278067	1.15596e-05	0.000683032	Cassette	Pre vs In
ENSSSCG00000007031	17:11359401-11359686	0.132726	0.000461426	0.0205932	Cassette	In vs Post
ENSSSCG00000007031	17:11367050-11367099	-0.481481	0.00106608	0.0261534	MXE	Pre vs In
ENSSSCG00000007088	17:26377560-26377635	-0.0986799	0.00121937	0.032383	Cassette	Pre vs Post
ENSSSCG00000007253	17:36391096-36391183	0.0734755	0.000216757	0.0117008	AltStart	In vs Post
ENSSSCG00000007253	17:36390808-36390842	0.134369	3.19408e-05	0.00182375	A5SS	Pre vs Post
ENSSSCG00000007253	17:36391064-36391144	0.0633224	0.000604669	0.0195346	AltStart	Pre vs Post
ENSSSCG00000007304	17:38896054-38896068	-0.109752	0.00019074	0.0069732	Cassette	Pre vs In
ENSSSCG00000007314	17:39378413-39378463	0.179295	0.000618244	0.025779	Cassette	In vs Post
ENSSSCG00000007314	17:39463019-39463123	0.216066	8.22475e-11	1.4746e-08	Cassette	Pre vs In
ENSSSCG00000007314	17:39466900-39468864	0.00635925	1.57451e-05	0.000882536	Cassette	Pre vs In
ENSSSCG00000007314	17:39457440-39457475	-0.0581805	0.000221083	0.00782037	Cassette	Pre vs In
ENSSSCG00000007314	17:39378413-39378463	-0.170427	0.000602387	0.0171392	Cassette	Pre vs In
ENSSSCG00000007314	17:39463019-39463123	0.229039	1.30875e-11	2.9633e-09	Cassette	Pre vs Post
ENSSSCG00000007525	17:59180480-59180507	0.0677249	0.000923604	0.0345317	A3SS	In vs Post
ENSSSCG00000007578	3:3773028-3773054	-0.703704	0.000670581	0.0275034	IR	In vs Post
ENSSSCG00000007978	3:41486832-41486944	0.276935	1.58118e-16	6.27104e-14	Cassette	Pre vs In
ENSSSCG00000008170	3:53294896-53295282	-0.0709979	6.6632e-07	5.64453e-05	IR	Pre vs In
ENSSSCG00000008254	3:64210472-64210567	0.0226131	0.00109532	0.0267312	Cassette	Pre vs In
ENSSSCG00000008488	3:102230623-102230676	0.330827	0.000380447	0.0121446	AltEnd	Pre vs In
ENSSSCG00000008677	8:828861-829050	0.530702	0.000449637	0.0157614	MXE	Pre vs Post
ENSSSCG00000008898	8:55884017-55884097	0.163417	9.40329e-07	8.57561e-05	AltStart	Pre vs Post
ENSSSCG00000008990	8:73345395-73345481	-0.213794	1.98485e-10	6.22214e-08	Cassette	In vs Post
ENSSSCG00000008990	8:73345385-73345481	-0.175752	1.61452e-05	0.00102182	Cassette	Pre vs Post
ENSSSCG00000009338	11:8734294-8734302	0.592593	1.34513e-16	6.99979e-14	Cassette	In vs Post
ENSSSCG00000009338	11:8737505-8737513	-0.428571	2.31441e-06	0.000305678	A3SS	In vs Post
ENSSSCG00000009338	11:8734294-8734302	-0.592593	4.67577e-11	8.68035e-09	Cassette	Pre vs In
ENSSSCG00000009338	11:8737505-8737513	-0.428571	0.000479733	0.0164708	A3SS	Pre vs Post
ENSSSCG00000009537	11:74746732-74746777	-0.0711427	0.00151704	0.048287	Cassette	In vs Post
ENSSSCG00000009775	14:29631816-29631896	0.0928174	0.000254941	0.0103016	AltStart	Pre vs Post
ENSSSCG00000010034	14:48421918-48422087	0.258431	0.00100542	0.0363334	A5SS	In vs Post
ENSSSCG00000010128	14:51256505-51256585	0.17554	0.000299762	0.00990727	AltStart	Pre vs In
ENSSSCG00000010128	14:51256505-51256585	0.237025	7.18984e-07	6.74433e-05	AltStart	Pre vs Post
ENSSSCG00000010212	14:63501004-63501036	0.0391304	1.04989e-06	0.000158821	Cassette	In vs Post
ENSSSCG00000010212	14:63459844-63462419	0.195238	6.61252e-05	0.00466263	Cassette	In vs Post
ENSSSCG00000010212	14:63661965-63661988	0.178806	3.21593e-11	6.01287e-09	Cassette	Pre vs In
ENSSSCG00000010212	14:63501004-63501036	-0.0299078	0.000971887	0.0243679	Cassette	Pre vs In
ENSSSCG00000010212	14:63661965-63661988	0.207843	2.14681e-15	7.9417e-13	Cassette	Pre vs Post
ENSSSCG00000010212	14:63468751-63468777	0.138946	7.03615e-06	0.000507704	Cassette	Pre vs Post
ENSSSCG00000010301	14:76262048-76262074	0.23275	2.15512e-21	1.20026e-18	Cassette	Pre vs In
ENSSSCG00000010301	14:76262048-76262074	0.214406	1.01859e-17	5.0478e-15	Cassette	Pre vs Post
ENSSSCG00000010344	14:84400573-84400644	0.210115	0.00015499	0.00906219	Cassette	In vs Post
ENSSSCG00000010440	14:99962475-99962555	0.0275	0.000460351	0.0160786	AltEnd	Pre vs Post
ENSSSCG00000010685	14:129453178-129453229	-0.182136	3.73443e-06	0.000449843	A3SS	In vs Post
ENSSSCG00000010685	14:129466652-129466800	0.148602	0.00107207	0.0376216	IR	In vs Post
ENSSSCG00000010734	14:133825924-133826047	-0.0553436	0.00234829	0.0459407	Cassette	Pre vs In
ENSSSCG00000010734	14:133824760-133824846	0.0961912	3.98394e-05	0.00220291	Cassette_multi	Pre vs Post
ENSSSCG00000010893	AEMK02000698.1:2553865-2558466	-0.944444	8.46247e-09	2.18005e-06	MXE	In vs Post
ENSSSCG00000010893	AEMK02000698.1:2549880-2550053	0.815359	1.81508e-06	0.000248561	MXE	In vs Post
ENSSSCG00000010893	AEMK02000698.1:2553865-2554021	-0.919753	4.40156e-18	2.22321e-15	MXE	Pre vs Post
ENSSSCG00000010893	AEMK02000698.1:2549880-2550053	0.829365	4.26328e-07	4.34012e-05	MXE	Pre vs Post
ENSSSCG00000011077	10:51896629-51896705	0.105068	5.33982e-05	0.00392477	Cassette	In vs Post
ENSSSCG00000011077	10:51896629-51896705	0.0979082	0.000139194	0.00628165	Cassette	Pre vs Post
ENSSSCG00000011121	10:61084709-61084789	-0.308266	0.00076897	0.030407	AltStart	In vs Post
ENSSSCG00000011267	13:24183512-24183549	-6.21195e-05	0.000853359	0.0220139	IR	Pre vs In
ENSSSCG00000011267	13:24142866-24142942	-0.234983	1.52293e-12	4.16664e-10	MXE	Pre vs Post
ENSSSCG00000011290	13:26283301-26283362	0.0701716	0.0013379	0.043828	Cassette_multi	In vs Post
ENSSSCG00000011290	13:26285462-26285499	-0.487805	0.000644848	0.0205048	Cassette	Pre vs Post
ENSSSCG00000011489	13:44026042-44026104	-0.0600365	0.000409505	0.0190266	Cassette	In vs Post
ENSSSCG00000011489	13:44084337-44084345	0.379242	2.41709e-56	9.03852e-53	Cassette	Pre vs In
ENSSSCG00000011489	13:44069441-44069587	0.435583	9.35187e-39	1.52997e-35	Cassette	Pre vs In
ENSSSCG00000011489	13:44098856-44098873	0.278598	1.10198e-29	1.15382e-26	Cassette	Pre vs In
ENSSSCG00000011489	13:44133035-44133115	0.0994898	1.14633e-09	1.74456e-07	AltEnd	Pre vs In
ENSSSCG00000011489	13:44084337-44084345	0.375585	3.3191e-58	9.68624e-55	Cassette	Pre vs Post
ENSSSCG00000011489	13:44098856-44098873	0.337533	3.32716e-42	5.46174e-39	Cassette	Pre vs Post
ENSSSCG00000011489	13:44069441-44069587	0.412751	1.59609e-34	1.82267e-31	Cassette	Pre vs Post
ENSSSCG00000011489	13:44133035-44133115	0.0994898	3.34615e-11	7.14526e-09	AltEnd	Pre vs Post
ENSSSCG00000011489	13:44026042-44026104	-0.06541	7.70957e-07	7.18056e-05	Cassette	Pre vs Post
ENSSSCG00000012202	X:26516933-26516950	0.635336	4.5937e-08	5.2054e-06	Cassette	Pre vs In
ENSSSCG00000012202	X:26516933-26516950	0.472458	1.80114e-06	0.000153594	Cassette	Pre vs Post
CASK	X:37263854-37263871	-0.166991	5.14546e-05	0.00384712	Cassette	In vs Post
CASK	X:37201173-37201241	0.0522285	0.00223286	0.0444466	MXE	Pre vs In
CASK	X:37263854-37263871	-0.203308	3.38849e-06	0.000263326	Cassette	Pre vs Post
ENSSSCG00000012403	X:57544764-57544864	0.0640015	1.68653e-06	0.000128475	Cassette	Pre vs In
ENSSSCG00000012403	X:57544764-57544864	0.0575004	0.000141918	0.00638267	Cassette	Pre vs Post
ENSSSCG00000012530	X:83582252-83582319	-0.894737	0.000522801	0.0155333	A5SS	Pre vs In
ENSSSCG00000013395	2:45834560-45834965	0.157364	8.69293e-07	7.17811e-05	AltStart	Pre vs In
ENSSSCG00000013717	2:70381972-70382010	-0.231579	0.000928948	0.0345784	Cassette	In vs Post
ENSSSCG00000013880	2:60093119-60093125	0.31471	1.39721e-07	2.73339e-05	A5SS	In vs Post
ENSSSCG00000013880	2:60119145-60119201	0.423946	6.49551e-29	6.29728e-26	Cassette	Pre vs In
ENSSSCG00000013880	2:60093270-60093275	0.106952	1.37403e-06	0.000106726	Cassette	Pre vs In
ENSSSCG00000013880	2:60093119-60093125	-0.256337	2.14339e-05	0.00114267	A5SS	Pre vs In
ENSSSCG00000013880	2:60119145-60119201	0.360613	9.263e-16	3.74296e-13	Cassette	Pre vs Post
ENSSSCG00000013880	2:60093270-60093275	0.106952	9.75681e-06	0.000660471	Cassette	Pre vs Post
ENSSSCG00000013928	2:58970771-58972554	-0.263353	3.0676e-05	0.00254191	A3SS	In vs Post
ENSSSCG00000013992	2:51219751-51219792	0.073356	4.18991e-30	8.96264e-27	IR	In vs Post
ENSSSCG00000013992	2:51219751-51219758	0.148529	4.82209e-22	3.802e-19	A5SS	In vs Post
ENSSSCG00000013992	2:51219751-51219792	-0.0739656	7.95642e-29	7.43812e-26	IR	Pre vs In
ENSSSCG00000013992	2:51219751-51219758	-0.178904	8.16244e-27	6.28412e-24	A5SS	Pre vs In
ENSSSCG00000013992	2:51219792-51219798	0.410227	7.48312e-06	0.000470861	Cassette	Pre vs In
ENSSSCG00000014060	2:81525365-81525370	0.0314607	0.00238622	0.0463081	A5SS	Pre vs In
ENSSSCG00000014060	2:81525610-81525697	-0.933333	1.06996e-06	9.65721e-05	MXE	Pre vs Post
ENSSSCG00000014060	2:81525365-81525370	0.0314607	0.000594993	0.0193579	A5SS	Pre vs Post
ENSSSCG00000014132	2:90697668-90697762	0.248627	0.000134333	0.00822404	Cassette	In vs Post
ENSSSCG00000014267	2:133920026-133922606	0.00420168	0.00042541	0.0195216	Cassette_multi	In vs Post
ENSSSCG00000014267	2:133734441-133734464	0.247681	6.08244e-08	6.71789e-06	Cassette	Pre vs In
ENSSSCG00000014267	2:133734441-133734464	0.221879	2.20002e-06	0.000182283	Cassette	Pre vs Post
ENSSSCG00000014267	2:133879175-133879244	0.0857671	1.89455e-05	0.00116535	Cassette	Pre vs Post
ENSSSCG00000014280	2:134813020-134813100	-0.301834	0.000498751	0.0149545	AltEnd	Pre vs In
ENSSSCG00000014343	2:141197029-141197126	-0.141576	0.000321221	0.0121744	AltStart	Pre vs Post
ENSSSCG00000014565	2:152684-152869	-0.287787	4.39397e-06	0.000512676	AltStart	In vs Post
ENSSSCG00000014565	2:125175-125493	-0.0702065	0.00022583	0.0120407	AltEnd	In vs Post
ENSSSCG00000014909	9:19732881-19732962	-0.199586	0.00191745	0.0404116	Cassette	Pre vs In
ENSSSCG00000014935	9:25469123-25469191	0.226121	0.000717873	0.0223665	Cassette_multi	Pre vs Post
ENSSSCG00000015293	9:68185371-68185451	0.309524	0.000508176	0.0151676	AltEnd	Pre vs In
ENSSSCG00000015313	9:72163244-72163281	0.048583	0.00145759	0.0469951	Cassette	In vs Post
ENSSSCG00000015434	9:105961066-105961075	-0.0595745	6.46491e-06	0.000417499	Cassette	Pre vs In
ENSSSCG00000015491	9:115952423-115952454	0.335362	0.000385766	0.0182828	AltEnd	In vs Post
ENSSSCG00000015545	9:123752918-123752965	-0.00584728	1.89134e-09	2.75042e-07	IR	Pre vs In
ENSSSCG00000015545	9:123752918-123752965	-0.00584728	1.13763e-06	0.000101825	IR	Pre vs Post
ENSSSCG00000015697	15:16988011-16988329	-0.199747	0.00079552	0.0209956	A5SS	Pre vs In
ENSSSCG00000016119	15:106944245-106944325	0.0682483	0.000600354	0.0194412	Cassette_multi	Pre vs Post
ENSSSCG00000016211	15:121255771-121256323	0.0165289	0.00202802	0.0417996	IR	Pre vs In
ENSSSCG00000016513	18:10757118-10757198	-0.553279	7.98963e-09	2.09982e-06	AltStart	In vs Post
ENSSSCG00000016513	18:10757118-10757198	-0.25	2.63313e-05	0.00136215	AltStart	Pre vs In
ENSSSCG00000016513	18:10757118-10757198	-0.803279	2.15342e-21	1.3795e-18	AltStart	Pre vs Post
ENSSSCG00000016711	18:46204297-46204377	0.2	0.000533472	0.0178265	AltStart	Pre vs Post
ENSSSCG00000017783	12:45344703-45344747	0.176996	4.39098e-07	3.88305e-05	Cassette	Pre vs In
ENSSSCG00000017783	12:45344703-45344747	0.173748	1.1106e-06	9.9897e-05	Cassette	Pre vs Post
ENSSSCG00000017868	12:49783641-49783857	0.273392	3.76002e-05	0.00210154	Cassette	Pre vs Post
ENSSSCG00000021322	X:20244977-20245030	-0.124932	0.00100248	0.036328	Cassette	In vs Post
ENSSSCG00000021380	13:133715518-133715585	-0.0244369	0.000398052	0.0186275	Cassette	In vs Post
ENSSSCG00000021380	13:133715518-133715585	0.0256822	0.00038794	0.0123237	Cassette	Pre vs In
ENSSSCG00000021427	2:151697671-151697691	0.111952	0.00052516	0.0155857	Cassette	Pre vs In
ENSSSCG00000021427	2:151697671-151697691	0.149222	1.90477e-06	0.000161383	Cassette	Pre vs Post
ENSSSCG00000021656	13:135996602-135996682	-0.134437	0.002155	0.0434757	AltStart	Pre vs In
ENSSSCG00000021774	13:100806198-100806279	-0.202318	0.000394299	0.0184852	Cassette	In vs Post
ENSSSCG00000021774	13:100807522-100807603	0.141997	0.00137521	0.0447349	AltStart	In vs Post
ENSSSCG00000021977	13:18175290-18175315	0.126615	0.000740878	0.0296827	IR	In vs Post
ENSSSCG00000021977	13:18175290-18175315	0.179894	0.000203599	0.00863899	IR	Pre vs Post
ENSSSCG00000022083	5:85083507-85083581	0.213291	2.24574e-11	8.00437e-09	Cassette	In vs Post
ENSSSCG00000022083	5:85083507-85083581	0.241992	2.71808e-14	9.15261e-12	Cassette	Pre vs Post
ENSSSCG00000022345	15:80813306-80813594	0.00822934	5.57386e-07	5.44229e-05	Cassette	Pre vs Post
ENSSSCG00000022345	15:80777130-80777210	0.162035	1.03965e-05	0.000698376	AltStart	Pre vs Post
ENSSSCG00000022634	2:66499855-66499988	-0.0649254	8.91637e-05	0.00597926	AltStart	In vs Post
ENSSSCG00000022634	2:66499855-66499988	0.0649254	5.74839e-05	0.00264446	AltStart	Pre vs In
ENSSSCG00000022912	18:40462405-40462485	0.245742	8.2443e-05	0.00356621	AltStart	Pre vs In
ENSSSCG00000023479	15:18445454-18445534	-0.207148	0.000261662	0.0134144	AltStart	In vs Post
ENSSSCG00000023479	15:18840939-18841019	-0.215256	2.26974e-08	2.72536e-06	AltStart	Pre vs In
ENSSSCG00000023479	15:18445454-18445534	0.212827	0.000310073	0.0101838	AltStart	Pre vs In
ENSSSCG00000023792	6:54303410-54303437	0.0252099	0.001379	0.0319157	A3SS	Pre vs In
ENSSSCG00000024163	X:57278149-57278229	-0.0472441	0.000603175	0.0253129	AltStart	In vs Post
ENSSSCG00000024419	6:108036489-108036616	0.339961	0.000461168	0.0160858	Cassette	Pre vs Post
ENSSSCG00000024486	17:11897193-11897204	-0.0892128	1.51759e-07	2.94674e-05	Cassette	In vs Post
ENSSSCG00000024486	17:11826011-11826082	0.0573824	2.26142e-06	0.000185613	Cassette	Pre vs Post
ENSSSCG00000024486	17:11897193-11897204	-0.0623018	0.00139275	0.0358126	Cassette	Pre vs Post
ENSSSCG00000024791	2:27188891-27188982	0.0190269	0.00165494	0.0364337	Cassette	Pre vs In
ENSSSCG00000024914	7:24039899-24039979	0.273829	0.000189076	0.0104895	IR	In vs Post
ENSSSCG00000024914	7:24039899-24039979	-0.281791	0.000234649	0.00822244	IR	Pre vs In
ENSSSCG00000025067	13:122177792-122177887	-0.0463554	0.0011125	0.0385947	Cassette	In vs Post
ENSSSCG00000025224	3:87034761-87034813	-0.0333748	0.00197258	0.0411427	Cassette	Pre vs In
ENSSSCG00000025514	8:67512820-67513172	-0.0233266	1.51678e-05	0.00140947	AltStart	In vs Post
ENSSSCG00000025514	8:67512820-67513172	-0.147575	3.39159e-05	0.00166858	AltStart	Pre vs In
ENSSSCG00000025672	6:147673621-147673701	1	5.66792e-17	2.39296e-14	AltEnd	Pre vs In
ENSSSCG00000026055	5:22088835-22088988	-0.147194	0.000996215	0.024791	Cassette	Pre vs In
ENSSSCG00000026129	8:60511134-60511148	0.814935	1.07113e-22	9.61028e-20	Cassette	In vs Post
ENSSSCG00000026129	8:60748436-60748462	-0.134784	0.000309265	0.01017	Cassette	Pre vs In
ENSSSCG00000026129	8:60748436-60748462	-0.119065	0.000578679	0.018975	Cassette	Pre vs Post
ENSSSCG00000026180	3:90857901-90858083	0.0882994	0.00212499	0.0430858	AltStart	Pre vs In
ENSSSCG00000026354	10:48109800-48109826	0.343013	1.31182e-17	6.13183e-15	Cassette	Pre vs In
ENSSSCG00000026354	10:48109800-48109826	0.373095	1.17676e-28	1.05197e-25	Cassette	Pre vs Post
ENSSSCG00000026457	3:15411556-15411636	0.174943	1.84582e-05	0.00100659	AltStart	Pre vs In
ENSSSCG00000027013	2:62064303-62064447	0.354167	0.00163693	0.036159	Cassette	Pre vs In
ENSSSCG00000027348	15:80548560-80549411	-0.487484	8.97335e-05	0.006002	A5SS	In vs Post
ENSSSCG00000027374	6:168667669-168667784	-0.0574682	0.0017711	0.0382512	Cassette	Pre vs In
ENSSSCG00000027491	18:51227746-51227904	0.527132	0.000135125	0.00825312	Cassette	In vs Post
ENSSSCG00000027491	18:51227746-51227904	-0.447154	0.00115199	0.0277411	Cassette	Pre vs In
ENSSSCG00000027907	2:77736952-77736966	-0.0883257	1.14372e-05	0.00112425	Cassette	In vs Post
ENSSSCG00000027907	2:77736952-77736966	0.222763	8.3736e-22	4.98153e-19	Cassette	Pre vs In
ENSSSCG00000027907	2:77736952-77736966	0.134438	1.31721e-07	1.587e-05	Cassette	Pre vs Post
ENSSSCG00000028479	17:14133181-14133278	0.0377134	0.000601122	0.0171368	Cassette	Pre vs In
ENSSSCG00000029251	13:30660679-30660759	-0.115712	0.000231201	0.0122284	AltStart	In vs Post
ENSSSCG00000029251	13:30650759-30650974	-0.281218	3.32873e-14	9.36912e-12	Cassette	Pre vs In
ENSSSCG00000029251	13:30643410-30643523	-0.205201	1.58079e-11	3.15869e-09	Cassette	Pre vs In
ENSSSCG00000029251	13:30660679-30660759	0.170276	4.12364e-08	4.77613e-06	AltStart	Pre vs In
ENSSSCG00000029251	13:30650759-30650974	-0.240909	6.60761e-11	1.35585e-08	Cassette	Pre vs Post
ENSSSCG00000029251	13:30643410-30643523	-0.154674	3.70226e-07	3.85873e-05	Cassette	Pre vs Post
ENSSSCG00000030131	7:51930611-51930737	0.168104	8.2469e-05	0.00408688	Cassette	Pre vs Post
ENSSSCG00000030362	13:135784641-135784890	0.549529	1.16043e-12	2.61857e-10	AltStart	Pre vs In
ENSSSCG00000030362	13:135784641-135784890	0.492113	1.99108e-08	2.90531e-06	AltStart	Pre vs Post
ENSSSCG00000030362	13:135733011-135733106	0.161598	0.000258591	0.010417	Cassette	Pre vs Post
ENSSSCG00000030478	5:89649790-89649812	-0.0571866	3.15391e-06	0.000396432	Cassette	In vs Post
ENSSSCG00000030478	5:89645332-89645412	-0.044335	1.17386e-07	1.20027e-05	AltStart	Pre vs In
ENSSSCG00000030478	5:89649790-89649812	-0.0597907	1.28179e-10	2.47546e-08	Cassette	Pre vs Post
ENSSSCG00000030478	5:89645332-89645412	-0.0428994	4.56992e-08	6.12392e-06	AltStart	Pre vs Post
ENSSSCG00000031171	18:8005982-8006041	0.611842	0.000957746	0.0274022	Cassette	Pre vs Post
ENSSSCG00000031521	6:129569372-129569395	0.155446	1.61843e-07	1.59787e-05	Cassette	Pre vs In
ENSSSCG00000031521	6:129571316-129571339	0.137894	6.76973e-06	0.000434325	Cassette	Pre vs In
ENSSSCG00000031521	6:129569372-129569395	0.151163	5.11867e-07	5.05421e-05	Cassette	Pre vs Post
ENSSSCG00000031599	11:39151257-39151337	0.131579	4.62823e-05	0.00354182	AltEnd	In vs Post
ENSSSCG00000031623	6:47713070-47713117	-0.220436	0.00203501	0.0467208	Cassette	Pre vs Post
ENSSSCG00000031774	6:62392924-62392968	0.227425	0.00125079	0.0329839	Cassette	Pre vs Post
ENSSSCG00000031796	16:37613845-37613925	0.0323034	2.67716e-05	0.00138029	AltStart	Pre vs In
ENSSSCG00000031796	16:37613845-37613925	0.0323034	1.24873e-05	0.000815867	AltStart	Pre vs Post
ENSSSCG00000031855	AEMK02000574.1:32637-33507	-0.0249632	0.00232456	0.0456815	A5SS	Pre vs In
ENSSSCG00000032058	7:73844356-73844414	0.300395	0.00153213	0.0483999	Cassette	In vs Post
ENSSSCG00000032297	1:261149373-261150039	0.239072	7.48202e-06	0.000811145	AltStart	In vs Post
ENSSSCG00000032297	1:261173339-261173419	-0.320852	0.00120446	0.041127	AltStart	In vs Post
ENSSSCG00000032297	1:261149373-261150039	0.154256	0.00011561	0.00540303	AltStart	Pre vs Post
ENSSSCG00000032395	AEMK02000489.1:49321-49328	-0.689617	2.96504e-72	1.54295e-68	MXE	In vs Post
ENSSSCG00000032395	AEMK02000489.1:48737-48817	0.985	5.65124e-27	7.35198e-24	AltStart	In vs Post
ENSSSCG00000032395	AEMK02000489.1:49164-49301	-0.0673842	0.000111588	0.00706423	MXE	In vs Post
ENSSSCG00000032395	AEMK02000489.1:49510-50157	1	7.63788e-37	1.05226e-33	A3SS	Pre vs In
ENSSSCG00000032459	6:67636673-67636735	-0.114844	0.00133505	0.0311499	Cassette	Pre vs In
ENSSSCG00000032789	3:68644060-68644137	0.195094	1.88669e-08	2.31859e-06	Cassette	Pre vs In
ENSSSCG00000032789	3:68644060-68644137	0.155394	6.16321e-05	0.00318655	Cassette	Pre vs Post
ENSSSCG00000032918	13:133778007-133778087	-0.0555556	0.00203088	0.0418257	AltEnd	Pre vs In
ENSSSCG00000032933	1:72520110-72520127	-0.0840336	0.00137545	0.0447349	A3SS	In vs Post
ENSSSCG00000032933	1:72520110-72520127	0.0840336	0.000174242	0.00644204	A3SS	Pre vs In
ENSSSCG00000033017	11:47829289-47829300	0.385669	5.79506e-19	3.23845e-16	Cassette	Pre vs Post
ENSSSCG00000033017	11:47829174-47829183	-0.248581	2.39103e-08	3.39461e-06	A3SS	Pre vs Post
ENSSSCG00000033537	12:8458556-8458636	-0.233655	0.000189051	0.0104895	AltEnd	In vs Post
ENSSSCG00000033648	3:4371241-4371446	0.186243	0.00011456	0.00469284	Cassette	Pre vs In
ENSSSCG00000033648	3:4381278-4381337	0.187045	1.01054e-05	0.000680562	Cassette	Pre vs Post
ENSSSCG00000033648	3:4371201-4371446	0.20115	2.34685e-05	0.00138829	Cassette	Pre vs Post
ENSSSCG00000033790	4:110480548-110481507	0.0231614	5.2594e-05	0.00277944	AltStart	Pre vs Post
ENSSSCG00000033790	4:110480067-110480922	0.0483668	0.00129356	0.0339075	AltStart	Pre vs Post
ENSSSCG00000033898	13:162860077-162860124	-0.26	2.11803e-05	0.00183697	Cassette	In vs Post
ENSSSCG00000033898	13:163069064-163069144	0.101496	0.00160539	0.0498687	AltEnd	In vs Post
ENSSSCG00000033898	13:162860077-162860124	0.163941	0.002558	0.0490536	Cassette	Pre vs In
ENSSSCG00000033937	9:33849165-33849185	0.2375	0.00153329	0.0344641	Cassette	Pre vs In
ENSSSCG00000034276	9:74404775-74404809	-0.235897	8.45266e-06	0.000883252	Cassette	In vs Post
ENSSSCG00000034276	9:74417052-74417078	0.113642	0.00236595	0.0461317	Cassette_multi	Pre vs In
ENSSSCG00000034332	12:44857723-44857827	0.440093	3.22166e-05	0.00160838	Cassette	Pre vs In
ENSSSCG00000034422	13:88215994-88216053	-0.577273	0.000528363	0.0156544	Cassette	Pre vs In
ENSSSCG00000034422	13:88215994-88216053	-0.692105	3.25686e-06	0.000256882	Cassette	Pre vs Post
ENSSSCG00000034524	AEMK02000529.1:13354-13362	0.641026	3.04059e-06	0.000384044	Cassette	In vs Post
ENSSSCG00000034524	AEMK02000529.1:13354-13362	-0.641026	0.000710205	0.0193851	Cassette	Pre vs In
ENSSSCG00000034540	6:57093721-57093801	-0.207973	0.000124029	0.00570511	AltEnd	Pre vs Post
ENSSSCG00000034619	AEMK02000278.1:124239-124278	0.224199	0.000222659	0.00785487	A3SS	Pre vs In
ENSSSCG00000034650	1:147665276-147665314	0.536364	0.00113766	0.0307099	MXE	Pre vs Post
ENSSSCG00000034755	2:7875588-7875668	0.222856	0.000390172	0.0123646	AltEnd	Pre vs In
ENSSSCG00000035000	3:24458060-24458187	-0.192727	0.00176941	0.0420576	Cassette	Pre vs Post
ENSSSCG00000035067	5:93287930-93288010	0.188406	0.000125547	0.00576486	AltEnd	Pre vs Post
ENSSSCG00000035162	6:45171603-45171691	-0.165848	0.0010856	0.0379126	A3SS	In vs Post
ENSSSCG00000035162	6:45171603-45171691	0.157983	0.00137701	0.0318978	A3SS	Pre vs In
ENSSSCG00000035273	3:44923623-44923698	0.135662	0.0021116	0.0429473	Cassette	Pre vs In
ENSSSCG00000035294	1:201725259-201725333	-0.246154	2.61805e-05	0.00135703	Cassette	Pre vs In
ENSSSCG00000035294	1:201722433-201722609	-0.649351	4.37309e-07	4.43472e-05	Cassette	Pre vs Post
ENSSSCG00000035340	AEMK02000282.1:41945-42061	0.244532	2.26056e-06	0.000166215	Cassette	Pre vs In
ENSSSCG00000035525	13:107017814-107018185	-0.192308	0.000164972	0.00619556	AltStart	Pre vs In
ENSSSCG00000035525	13:107082967-107083064	-0.0726974	0.000589189	0.016884	Cassette	Pre vs In
ENSSSCG00000035525	13:107494941-107495063	-0.211175	0.0013457	0.0313391	Cassette_multi	Pre vs In
ENSSSCG00000035525	13:107368654-107368708	0.0421687	0.00136854	0.0318144	AltStart	Pre vs In
ENSSSCG00000035525	13:107082967-107083064	-0.0875356	3.16742e-05	0.00181247	Cassette	Pre vs Post
ENSSSCG00000035525	13:107494941-107495063	-0.196003	0.00219446	0.0493603	Cassette_multi	Pre vs Post
ENSSSCG00000035538	4:40408848-40410734	-0.00707482	0.000583882	0.0246624	A3SS	In vs Post
ENSSSCG00000035557	X:49507167-49507247	-0.232897	0.000751217	0.0230499	AltStart	Pre vs Post
ENSSSCG00000035570	6:47653588-47654157	0.0364977	0.00120791	0.0411472	AltStart	In vs Post
ENSSSCG00000035617	9:119887318-119887391	0.726891	0.000491669	0.0148405	Cassette	Pre vs In
ENSSSCG00000035636	14:75082166-75082184	0.332722	0.000281854	0.00938652	Cassette	Pre vs In
ENSSSCG00000035636	14:75108212-75109240	0.199495	0.000503109	0.0150507	AltEnd	Pre vs In
ENSSSCG00000035768	3:26776804-26777379	0.00632219	0.000431463	0.0196437	A5SS	In vs Post
ENSSSCG00000036000	8:60511134-60511148	0.834101	3.40476e-22	2.35332e-19	Cassette	Pre vs Post
ENSSSCG00000036083	14:102891647-102891813	-0.262366	0.000596251	0.0193579	AltStart	Pre vs Post
ENSSSCG00000036089	12:21768505-21768585	-0.121255	0.0020525	0.0469385	AltStart	Pre vs Post
ENSSSCG00000036104	2:100394820-100394900	-0.0558677	0.00134542	0.0348379	AltEnd	Pre vs Post
ENSSSCG00000036306	6:61211318-61211413	0.427806	9.49435e-10	2.77566e-07	MXE	In vs Post
ENSSSCG00000036306	6:61220225-61220320	-0.20354	0.000820785	0.0213355	MXE	Pre vs In
ENSSSCG00000036306	6:61211318-61211413	0.427806	1.12882e-10	2.21257e-08	MXE	Pre vs Post
ENSSSCG00000036306	6:61205886-61205981	-0.054178	0.00102588	0.0287313	Cassette_multi	Pre vs Post
ENSSSCG00000036306	6:61220225-61220320	-0.213844	0.00182418	0.042932	MXE	Pre vs Post
ENSSSCG00000036401	3:72952265-72952375	0.0263767	0.000926843	0.0235316	Cassette_multi	Pre vs In
ENSSSCG00000036410	15:105079677-105079848	0.0851804	0.000437739	0.0154769	Cassette	Pre vs Post
ENSSSCG00000036465	AEMK02000189.1:62638-69074	-0.211485	9.14344e-05	0.00388537	MXE	Pre vs In
ENSSSCG00000036601	6:61658978-61659058	-0.392113	0.00026104	0.008874	AltStart	Pre vs In
ENSSSCG00000036601	6:61658978-61659058	-0.376622	0.000151625	0.00677284	AltStart	Pre vs Post
ENSSSCG00000036655	X:115222916-115222940	0.472441	3.30097e-17	1.4165e-14	Cassette	Pre vs In
ENSSSCG00000036655	X:115222995-115223007	0.483871	1.70519e-08	2.12548e-06	A5SS	Pre vs In
ENSSSCG00000036655	X:115222055-115222074	-0.975309	4.15618e-17	1.98476e-14	Cassette	Pre vs Post
ENSSSCG00000036655	X:115222015-115222054	0.908046	4.75914e-14	1.52437e-11	A3SS	Pre vs Post
ENSSSCG00000036669	2:9210979-9211074	0.30075	7.98063e-17	4.23771e-14	Cassette	In vs Post
ENSSSCG00000036669	2:9201008-9201011	0.61628	1.56532e-14	7.02209e-12	Cassette	In vs Post
ENSSSCG00000036669	2:9211309-9211362	0.493215	3.53253e-14	1.55785e-11	MXE	In vs Post
ENSSSCG00000036669	2:9203408-9203455	-0.350877	8.13633e-08	1.66692e-05	MXE	In vs Post
ENSSSCG00000036669	2:9208423-9208477	0.278377	3.55365e-07	6.37672e-05	Cassette	In vs Post
ENSSSCG00000036669	2:9209796-9209874	0.433208	4.63018e-07	7.97833e-05	A5SS	In vs Post
ENSSSCG00000036669	2:9201331-9201391	0.241938	6.13301e-07	9.97342e-05	Cassette	In vs Post
ENSSSCG00000036669	2:9206200-9206353	-0.878253	7.62382e-07	0.000120221	MXE	In vs Post
ENSSSCG00000036669	2:9210883-9210937	-0.198981	1.17087e-06	0.000174084	MXE	In vs Post
ENSSSCG00000036669	2:9211370-9211411	-0.322286	1.324e-05	0.0012759	A3SS	In vs Post
ENSSSCG00000036669	2:9211459-9211650	0.488835	7.67036e-05	0.00526583	MXE	In vs Post
ENSSSCG00000036669	2:9209533-9209586	-0.0771959	0.000115808	0.00729594	MXE	In vs Post
ENSSSCG00000036669	2:9209029-9209250	0.476403	0.00011783	0.00740536	Cassette	In vs Post
ENSSSCG00000036669	2:9201526-9201601	1	0.000184795	0.0104073	A5SS	In vs Post
ENSSSCG00000036669	2:9211843-9211923	0.0430335	0.000222375	0.0119545	AltEnd	In vs Post
ENSSSCG00000036669	2:9209971-9210066	0.201482	0.000924638	0.0345317	MXE	In vs Post
ENSSSCG00000036669	2:9202766-9202801	-0.229483	0.00150353	0.048063	Cassette	In vs Post
ENSSSCG00000036669	2:9209891-9209916	0.207576	2.53562e-12	5.53103e-10	MXE	Pre vs In
ENSSSCG00000036669	2:9201266-9201331	-0.705882	1.10668e-11	2.24562e-09	A3SS	Pre vs In
ENSSSCG00000036669	2:9208423-9208477	-0.32533	3.12583e-11	5.88645e-09	Cassette	Pre vs In
ENSSSCG00000036669	2:9209029-9209250	-0.675273	8.66331e-10	1.34184e-07	Cassette	Pre vs In
ENSSSCG00000036669	2:9201008-9201043	-0.487349	2.49141e-09	3.5443e-07	Cassette	Pre vs In
ENSSSCG00000036669	2:9206569-9206716	0.902965	3.80148e-09	5.20982e-07	MXE	Pre vs In
ENSSSCG00000036669	2:9200882-9200946	0.762712	5.77594e-09	7.75339e-07	MXE	Pre vs In
ENSSSCG00000036669	2:9210945-9210978	-0.597531	6.18035e-09	8.25392e-07	A5SS	Pre vs In
ENSSSCG00000036669	2:9211309-9211362	-0.291141	5.11605e-08	5.72298e-06	MXE	Pre vs In
ENSSSCG00000036669	2:9201044-9201257	0.659649	7.34101e-08	8.00659e-06	Cassette	Pre vs In
ENSSSCG00000036669	2:9210985-9211074	-0.47314	1.16144e-07	1.19289e-05	A5SS	Pre vs In
ENSSSCG00000036669	2:9209683-9209796	0.262353	2.0208e-07	1.95189e-05	Cassette	Pre vs In
ENSSSCG00000036669	2:9205817-9205879	0.336642	1.89646e-06	0.000141833	Cassette	Pre vs In
ENSSSCG00000036669	2:9209824-9209874	-0.287293	3.49157e-06	0.000243073	MXE	Pre vs In
ENSSSCG00000036669	2:9209533-9209586	-0.209443	4.88994e-06	0.000329046	Cassette	Pre vs In
ENSSSCG00000036669	2:9211651-9211746	0.411277	5.70304e-05	0.00262822	Cassette	Pre vs In
ENSSSCG00000036669	2:9212227-9212341	-0.424323	8.51933e-05	0.0036678	A3SS	Pre vs In
ENSSSCG00000036669	2:9211747-9211827	0.117519	9.10117e-05	0.0038737	AltEnd	Pre vs In
ENSSSCG00000036669	2:9211843-9211923	-0.035402	0.000205597	0.00735118	AltEnd	Pre vs In
ENSSSCG00000036669	2:9211370-9211411	0.264253	0.000307415	0.0101346	A3SS	Pre vs In
ENSSSCG00000036669	2:9212131-9212211	-0.144758	0.000456165	0.0139656	AltEnd	Pre vs In
ENSSSCG00000036669	2:9201396-9201526	-1	2.02962e-16	9.03523e-14	MXE	Pre vs Post
ENSSSCG00000036669	2:9200882-9201043	0.59789	5.99244e-09	9.36854e-07	MXE	Pre vs Post
ENSSSCG00000036669	2:9209533-9209586	-0.16547	1.5893e-08	2.35836e-06	MXE	Pre vs Post
ENSSSCG00000036669	2:9211693-9211746	0.546542	2.52852e-08	3.55142e-06	Cassette	Pre vs Post
ENSSSCG00000036669	2:9210945-9210978	-0.597531	4.42115e-07	4.46621e-05	A5SS	Pre vs Post
ENSSSCG00000036669	2:9209594-9209682	-0.250809	5.17112e-07	5.08687e-05	MXE	Pre vs Post
ENSSSCG00000036669	2:9201331-9201391	0.338119	1.49233e-05	0.000960691	Cassette	Pre vs Post
ENSSSCG00000036669	2:9211747-9211827	0.150408	1.63797e-05	0.00103168	AltEnd	Pre vs Post
ENSSSCG00000036669	2:9210067-9210214	-0.373823	5.20178e-05	0.00276009	MXE	Pre vs Post
ENSSSCG00000036669	2:9209149-9209177	-0.240437	6.40106e-05	0.00328367	A3SS	Pre vs Post
ENSSSCG00000036669	2:9205370-9205432	-0.589911	7.47354e-05	0.0037389	Cassette	Pre vs Post
ENSSSCG00000036669	2:9209916-9209970	-0.148626	0.000104062	0.00495142	A5SS	Pre vs Post
ENSSSCG00000036669	2:9211189-9211362	-0.361117	0.000176023	0.00770539	Cassette	Pre vs Post
ENSSSCG00000036669	2:9207031-9207066	-0.234205	0.000246845	0.0100596	MXE	Pre vs Post
ENSSSCG00000036669	2:9202766-9202801	-0.260344	0.000946425	0.0272189	Cassette	Pre vs Post
ENSSSCG00000036669	2:9212131-9212211	-0.1453	0.0011662	0.0312235	AltEnd	Pre vs Post
ENSSSCG00000036669	2:9210883-9210924	-0.6	0.00175664	0.0419452	MXE	Pre vs Post
ENSSSCG00000036669	2:9209971-9210066	0.183694	0.00193049	0.0449039	MXE	Pre vs Post
ENSSSCG00000036726	AEMK02000694.1:96052-96068	0.360952	0.000126563	0.0078406	A5SS	In vs Post
ENSSSCG00000036726	AEMK02000694.1:96052-96068	-0.378236	0.000676978	0.0186336	A5SS	Pre vs In
ENSSSCG00000036998	6:47653588-47654157	0.0318251	0.000385297	0.0182828	AltStart	In vs Post
ENSSSCG00000037068	X:84684597-84684656	-0.67437	1.24657e-05	0.00121024	A3SS	In vs Post
ENSSSCG00000037068	X:84683958-84683997	1	9.08434e-05	0.00442672	A3SS	Pre vs Post
ENSSSCG00000037068	X:84683929-84684486	-0.272002	0.00138922	0.0357725	Cassette_multi	Pre vs Post
ENSSSCG00000037214	14:48813646-48813726	-0.310345	0.000198999	0.00719474	AltStart	Pre vs In
ENSSSCG00000037597	5:21374085-21374542	0.0191584	0.00186054	0.0395947	AltStart	Pre vs In
ENSSSCG00000037655	13:189289996-189290151	0.0817378	0.00157955	0.0493971	Cassette_multi	In vs Post
ENSSSCG00000037775	AEMK02000452.1:3658727-3658807	0.135119	1.09701e-05	0.00109781	AltEnd	In vs Post
ENSSSCG00000037775	AEMK02000452.1:3677529-3677564	-0.559511	0.000274678	0.0140134	MXE	In vs Post
ENSSSCG00000037775	AEMK02000452.1:3633815-3634045	-0.423821	6.19235e-15	1.97672e-12	AltEnd	Pre vs In
ENSSSCG00000037775	AEMK02000452.1:3633815-3633895	-0.247238	1.2074e-06	9.51952e-05	AltEnd	Pre vs In
ENSSSCG00000037775	AEMK02000452.1:3772920-3773000	-0.175055	5.63759e-06	0.000372651	AltStart	Pre vs In
ENSSSCG00000037775	AEMK02000452.1:3677565-3677682	0.203122	0.000295392	0.00978755	Cassette	Pre vs In
ENSSSCG00000037775	AEMK02000452.1:3659296-3659435	-0.282198	0.00132063	0.0309478	MXE	Pre vs In
ENSSSCG00000037775	AEMK02000452.1:3772920-3773000	-0.291588	4.49031e-16	1.87203e-13	AltStart	Pre vs Post
ENSSSCG00000037775	AEMK02000452.1:3658935-3658970	0.404986	7.3431e-07	6.86357e-05	MXE	Pre vs Post
ENSSSCG00000037775	AEMK02000452.1:3677565-3677682	0.376788	1.20648e-06	0.000107417	Cassette	Pre vs Post
ENSSSCG00000037775	AEMK02000452.1:3764262-3764730	-0.251765	1.95347e-05	0.00119599	AltEnd	Pre vs Post
ENSSSCG00000037775	AEMK02000452.1:3764261-3767098	-0.309367	9.17444e-05	0.00446235	AltEnd	Pre vs Post
ENSSSCG00000037775	AEMK02000452.1:3762708-3764541	-0.222252	0.000307994	0.0118632	AltEnd	Pre vs Post
ENSSSCG00000037775	AEMK02000452.1:3634546-3634664	-0.595705	0.000335944	0.0125403	A3SS	Pre vs Post
ENSSSCG00000037775	AEMK02000452.1:3764261-3768152	-0.219261	0.00080019	0.0238558	AltEnd	Pre vs Post
ENSSSCG00000037808	4:110433553-110433588	0.206482	3.11677e-11	1.06704e-08	AltStart	In vs Post
ENSSSCG00000037808	4:110480859-110480894	0.171005	1.80761e-06	0.000248561	AltStart	In vs Post
ENSSSCG00000037808	4:110432579-110432821	0.411015	8.40828e-06	0.000882158	MXE	In vs Post
ENSSSCG00000037808	4:110481427-110481507	0.344423	2.94553e-05	0.00245641	AltStart	In vs Post
ENSSSCG00000037808	4:110455201-110455281	0.152972	0.000123953	0.00769722	AltEnd	In vs Post
ENSSSCG00000037808	4:110451688-110451785	0.114355	0.000545722	0.0160684	MXE	Pre vs In
ENSSSCG00000037808	4:110433553-110433588	0.102258	0.00236686	0.0461317	AltStart	Pre vs In
ENSSSCG00000037808	4:110433242-110433317	0.30709	2.24182e-06	0.000184581	MXE	Pre vs Post
ENSSSCG00000037808	4:110480859-110480894	0.19941	9.69882e-06	0.000658242	AltStart	Pre vs Post
ENSSSCG00000037897	1:147684513-147684570	-0.000243136	2.22673e-07	2.13157e-05	IR	Pre vs In
ENSSSCG00000037897	1:147684568-147684590	-0.342857	0.00126633	0.0332601	MXE	Pre vs Post
ENSSSCG00000037997	10:11048470-11048513	-0.452381	0.00153224	0.0483999	Cassette	In vs Post
ENSSSCG00000037997	10:11297148-11297290	0.307561	0.000475286	0.0144496	Cassette	Pre vs In
ENSSSCG00000038144	12:53779700-53780022	-0.0647754	0.000196365	0.00714888	AltStart	Pre vs In
ENSSSCG00000038144	12:53779700-53780022	-0.0296233	0.00115643	0.031048	AltStart	Pre vs Post
ENSSSCG00000038228	3:48632051-48632108	0.148884	0.00068111	0.021442	Cassette	Pre vs Post
ENSSSCG00000038359	12:52660346-52660415	-0.0587862	8.25611e-05	0.00356621	AltStart	Pre vs In
ENSSSCG00000038539	10:8693919-8694011	0.358202	2.17111e-08	2.6433e-06	Cassette	Pre vs In
ENSSSCG00000038539	10:8862234-8862374	-0.390435	2.32852e-06	0.000170255	Cassette	Pre vs In
ENSSSCG00000038539	10:8713111-8713144	0.188525	0.000111048	0.00456327	A5SS	Pre vs In
ENSSSCG00000038539	10:8583492-8583570	0.230769	0.000761302	0.023204	Cassette	Pre vs Post
ENSSSCG00000038539	10:8862234-8862374	-0.249286	0.000823189	0.0243755	Cassette	Pre vs Post
ENSSSCG00000038679	AEMK02000153.1:74355-74496	0.111526	4.43336e-05	0.00239101	Cassette_multi	Pre vs Post
ENSSSCG00000038679	AEMK02000153.1:55311-55396	0.561439	0.00112462	0.0304518	A3SS	Pre vs Post
ENSSSCG00000038924	2:18641937-18642017	-0.376894	0.000778197	0.0207149	AltStart	Pre vs In
ENSSSCG00000038924	2:18639166-18639246	-0.421769	0.00163287	0.0361288	AltEnd	Pre vs In
ENSSSCG00000038960	17:12038198-12038272	0.386417	0.000586255	0.016845	Cassette	Pre vs In
ENSSSCG00000038989	12:47601879-47601920	-0.0355951	2.06023e-05	0.00179282	IR	In vs Post
ENSSSCG00000038989	12:47603720-47603766	0.105695	2.11483e-13	5.32287e-11	Cassette	Pre vs In
ENSSSCG00000038989	12:47593706-47593786	0.962264	8.13209e-06	0.000508033	AltEnd	Pre vs In
ENSSSCG00000038989	12:47597887-47597967	-0.633094	0.000468912	0.0143056	AltEnd	Pre vs In
ENSSSCG00000038989	12:47601879-47601920	0.0355951	0.000500387	0.0149864	IR	Pre vs In
ENSSSCG00000038989	12:47603720-47603766	0.0859316	3.37114e-08	4.63576e-06	Cassette	Pre vs Post
ENSSSCG00000038990	17:44911324-44911380	0.240186	0.000203195	0.00729606	Cassette	Pre vs In
ENSSSCG00000038990	17:44911324-44911380	0.302026	8.74487e-06	0.000606026	Cassette	Pre vs Post
ENSSSCG00000038990	17:44760115-44760195	0.0539216	0.00199247	0.0460265	AltStart	Pre vs Post
ENSSSCG00000039009	1:229588344-229588395	0.179469	3.30609e-06	0.000232011	Cassette_multi	Pre vs In
ENSSSCG00000039009	1:229588344-229588395	0.226671	7.47169e-10	1.29108e-07	Cassette_multi	Pre vs Post
ENSSSCG00000039331	3:74136665-74136671	0.081761	0.000137514	0.00538052	A5SS	Pre vs In
ENSSSCG00000039331	3:74136665-74136671	0.161826	1.2928e-09	2.17824e-07	A5SS	Pre vs Post
ENSSSCG00000039460	6:59556720-59556725	0.871096	7.37283e-117	1.92991e-112	A5SS	Pre vs In
ENSSSCG00000039460	6:59556720-59557062	0.773292	2.31674e-28	1.89509e-25	IR	Pre vs In
ENSSSCG00000039460	6:59556750-59556847	0.155303	8.78838e-09	1.13883e-06	AltStart	Pre vs In
ENSSSCG00000039460	6:59556982-59557062	0.0675009	8.81899e-05	0.00377199	A3SS	Pre vs In
ENSSSCG00000039460	6:59556720-59556725	0.865939	3.39338e-116	2.22818e-112	A5SS	Pre vs Post
ENSSSCG00000039460	6:59556720-59557062	0.771957	7.56206e-28	6.40701e-25	IR	Pre vs Post
ENSSSCG00000039460	6:59556750-59556847	0.165749	4.8418e-10	8.53489e-08	AltStart	Pre vs Post
ENSSSCG00000039476	AEMK02000465.1:627878-627958	-0.142642	0.00056283	0.0185946	AltEnd	Pre vs Post
ENSSSCG00000039544	14:80478363-80478383	0.181712	1.89073e-14	5.56088e-12	Cassette	Pre vs In
ENSSSCG00000039544	14:80478383-80480327	-0.223307	1.48135e-05	0.000835687	IR	Pre vs In
ENSSSCG00000039544	14:80478363-80478383	0.187142	1.68034e-15	6.49032e-13	Cassette	Pre vs Post
ENSSSCG00000039544	14:80478383-80480327	-0.183669	0.000245734	0.0100376	IR	Pre vs Post
ENSSSCG00000039632	4:89959282-89959344	0.220588	0.000320038	0.0121471	Cassette	Pre vs Post
ENSSSCG00000039813	8:113231308-113231361	0.0556554	0.000344379	0.0168429	Cassette	In vs Post
ENSSSCG00000039813	8:113231308-113231361	-0.0427062	0.00129728	0.03051	Cassette	Pre vs In
ENSSSCG00000039813	8:113322811-113322897	-0.0561329	0.00215886	0.043503	MXE	Pre vs In
ENSSSCG00000039854	4:122280856-122280911	0.0332078	0.00185008	0.0394557	Cassette	Pre vs In
ENSSSCG00000039860	AEMK02000254.1:32514-32520	0.021861	2.54375e-07	2.84304e-05	A3SS	Pre vs Post
ENSSSCG00000040113	AEMK02000156.1:90549-90629	0.240335	0.000111533	0.00706423	AltStart	In vs Post
ENSSSCG00000040228	1:208150861-208150941	0.254153	0.000995001	0.0362002	AltStart	In vs Post
ENSSSCG00000040248	17:36318399-36318430	0.0899084	0.00127917	0.0428349	Cassette	In vs Post
ENSSSCG00000040392	17:49389217-49390223	-0.0929607	0.000274927	0.0109243	AltStart	Pre vs Post
ENSSSCG00000040422	14:40948634-40948737	-0.0471099	0.000724839	0.0196616	Cassette	Pre vs In
ENSSSCG00000040422	14:40948634-40948737	-0.0825216	1.63378e-06	0.000140233	Cassette	Pre vs Post
ENSSSCG00000040553	2:51247237-51247317	-0.107713	0.00032429	0.0122715	AltEnd	Pre vs Post
ENTPD1	14:107296296-107296317	0.277042	1.67124e-06	0.000233785	Cassette	In vs Post
ENTPD1	14:107296296-107296317	0.283725	2.24981e-07	2.55807e-05	Cassette	Pre vs Post
ENY2	4:28196555-28196579	0.0793438	2.90533e-06	0.000208928	Cassette	Pre vs In
ENY2	4:28196555-28196579	0.0801927	8.08419e-07	7.47645e-05	Cassette	Pre vs Post
EP400	14:23336875-23337093	0.392361	4.70324e-05	0.00358638	Cassette	In vs Post
EP400	14:23336875-23337093	0.375716	0.000426006	0.0151613	Cassette	Pre vs Post
EPB41	6:85865224-85865486	-0.196995	0.000330697	0.0107666	AltStart	Pre vs In
EPB41	6:85922219-85922236	-0.188749	0.000183093	0.00796181	A3SS	Pre vs Post
EPB41	6:85865271-85865486	-0.199394	0.0017638	0.0420003	AltStart	Pre vs Post
EPB41L2	1:32468834-32468914	0.0455312	4.72178e-07	8.08262e-05	AltStart	In vs Post
EPB41L2	1:32603074-32603196	-0.0863374	0.000108577	0.00448989	Cassette	Pre vs In
EPB41L2	1:32600543-32601100	0.15509	0.000909687	0.0232485	Cassette	Pre vs In
EPB41L2	1:32468834-32468914	0.0651828	1.3205e-09	2.2091e-07	AltStart	Pre vs Post
EPB41L2	1:32586183-32586979	-0.0195388	9.82415e-06	0.000663319	A5SS	Pre vs Post
EPB41L2	1:32598082-32598249	0.255319	8.81521e-05	0.00431962	Cassette	Pre vs Post
EPB41L2	1:32587036-32590349	0.0327869	0.000364898	0.0133482	Cassette	Pre vs Post
EPB41L3	6:101517846-101517926	0.124069	5.64871e-13	2.37054e-10	AltStart	In vs Post
EPB41L3	6:101480388-101480442	-0.314361	4.26219e-07	7.39319e-05	AltStart	In vs Post
EPB41L3	6:101517846-101517926	-0.0945556	4.09261e-07	3.65626e-05	AltStart	Pre vs In
EPB41L3	6:101665368-101665490	0.0697133	0.00103606	0.0255366	Cassette_multi	Pre vs In
EPB41L3	6:101517251-101517387	-0.113542	0.00107969	0.0264377	AltStart	Pre vs In
EPB41L3	6:101668756-101668872	0.0324693	0.00129965	0.0305383	Cassette	Pre vs In
EPB41L3	6:101655276-101655311	0.0870624	0.00206777	0.0424184	Cassette	Pre vs In
EPB41L3	6:101642976-101643056	0.036749	0.00242106	0.0468305	AltStart	Pre vs In
EPB41L3	6:101480388-101480442	-0.194673	0.000175298	0.00770194	AltStart	Pre vs Post
EPB41L3	6:101655276-101655311	0.0976086	0.000445448	0.0156622	Cassette	Pre vs Post
EPB41L3	6:101665368-101665490	0.081403	0.000690441	0.0216353	Cassette_multi	Pre vs Post
EPB41L3	6:101517846-101517926	0.0295139	0.00111812	0.0303383	AltStart	Pre vs Post
EPC2	15:3525259-3525466	-0.14847	2.45237e-10	7.59621e-08	AltStart	In vs Post
EPC2	15:3525259-3525466	0.0624303	3.72783e-08	4.33687e-06	AltStart	Pre vs In
EPS15L1	2:61224404-61224451	0.303854	4.68049e-08	1.02338e-05	Cassette	In vs Post
EPS15L1	2:61224404-61224451	-0.258075	9.75556e-05	0.00410549	Cassette	Pre vs In
EPS8	5:56947103-56947153	0.180968	0.000794421	0.0209956	Cassette	Pre vs In
EPS8	5:56947103-56947153	0.175786	0.000363995	0.0133362	Cassette	Pre vs Post
ERBB4	15:113978312-113978359	-0.137889	0.000823266	0.031971	Cassette	In vs Post
ERBB4	15:113978312-113978359	0.137757	0.000402974	0.0126175	Cassette	Pre vs In
ERBIN	16:44432764-44432832	-0.130985	1.50141e-05	0.00140019	Cassette	In vs Post
ERBIN	16:44432764-44432832	-0.0854611	0.0019319	0.0449039	Cassette	Pre vs Post
ERC1	5:68374327-68374338	-0.271605	6.4399e-05	0.00290639	Cassette	Pre vs In
ERC1	5:68317772-68317864	-0.126515	0.000416923	0.0129459	Cassette	Pre vs In
ERC2	13:37888897-37888932	0.154255	0.000138116	0.00539599	Cassette_multi	Pre vs In
ERMARD	1:531642-532333	0.227273	0.00201785	0.041645	Cassette_multi	Pre vs In
ESR1	1:14447634-14447762	0.264792	0.000117775	0.00548469	Cassette	Pre vs Post
ESYT2	18:622028-622129	-0.142982	0.000767243	0.0204932	Cassette	Pre vs In
ETFB	6:58502896-58503116	-0.110648	0.00013561	0.00534598	Cassette	Pre vs In
ETFDH	8:47639523-47639600	0.068933	7.86457e-07	6.58838e-05	Cassette	Pre vs In
ETFDH	8:47669868-47669948	-0.0375137	0.00260088	0.049694	AltStart	Pre vs In
ETFDH	8:47639523-47639600	0.0507155	6.95668e-05	0.00353418	Cassette	Pre vs Post
ETNPPL	8:113376773-113376855	0.0971916	0.000302517	0.0117539	Cassette	Pre vs Post
ETV7	7:32104548-32104606	0.55	0.00112294	0.0271163	Cassette	Pre vs In
ETV7	7:32104548-32104606	0.625	0.000190899	0.00821962	Cassette	Pre vs Post
EVL	7:121050815-121050877	-0.124769	0.000152062	0.00895138	Cassette	In vs Post
EVL	7:121050815-121050877	0.190308	2.96509e-10	4.9123e-08	Cassette	Pre vs In
EWSR1	14:46415965-46415982	0.189187	4.71428e-12	9.9517e-10	Cassette	Pre vs In
EWSR1	14:46415965-46415982	0.231012	1.09691e-18	5.87967e-16	Cassette	Pre vs Post
EXOC6	14:104485061-104485090	0.249265	0.00203313	0.0467194	Cassette	Pre vs Post
EXOSC4	4:618562-618570	0.777778	0.000168808	0.00971727	A3SS	In vs Post
EXOSC4	4:619941-619963	0.10989	0.00101628	0.0365404	A5SS	In vs Post
FA2H	6:12881213-12881293	-0.0723982	0.000457706	0.0160075	AltStart	Pre vs Post
FAM120B	1:174577-174614	0.501833	1.07729e-12	2.49549e-10	IR	Pre vs In
FAM120B	1:174577-174614	0.261855	1.17691e-05	0.000774727	IR	Pre vs Post
FAM126B	15:104714536-104714591	-0.0921821	0.00124092	0.0327895	Cassette	Pre vs Post
FAM131A	13:122227851-122228001	0.249427	3.70528e-05	0.00297555	AltStart	In vs Post
FAM149B1	14:76051231-76051455	-0.272825	5.89168e-05	0.00270266	Cassette	Pre vs In
FAM149B1	14:76051231-76051455	-0.202077	0.000463847	0.0161363	Cassette	Pre vs Post
FAM162A	13:138149887-138149959	0.020979	0.00185489	0.0395065	Cassette	Pre vs In
FAM172A	2:100850406-100850506	0.059031	8.23003e-05	0.00560569	Cassette_multi	In vs Post
FAM172A	2:100477779-100483859	0.00735899	0.000504989	0.0171585	AltEnd	Pre vs Post
FAM199X	X:84873289-84873369	0.299539	0.000246988	0.0128271	AltEnd	In vs Post
FAM208A	13:38526031-38526130	-0.0768003	1.53095e-05	0.00141757	Cassette	In vs Post
FAM208A	13:38526031-38526130	0.0817049	3.36485e-06	0.000235504	Cassette	Pre vs In
FAM208B	10:65252123-65252447	0.379167	0.00162851	0.0401247	AltStart	Pre vs Post
FAM45A	14:129030280-129030359	0.093991	0.00230808	0.0455285	Cassette	Pre vs In
FAM53B	14:134002502-134002537	0.67126	2.03082e-12	8.00605e-10	IR	In vs Post
FAM53B	14:134002502-134002537	0.0787402	1.1178e-07	1.15651e-05	IR	Pre vs In
FAM76A	6:84895315-84895395	0.0822689	0.000923043	0.0234806	AltEnd	Pre vs In
FAM76A	6:84895315-84895395	0.0828505	7.71567e-05	0.0038527	AltEnd	Pre vs Post
FANCL	3:83358884-83358984	-0.409314	0.000215063	0.00896608	MXE	Pre vs Post
FBLN2	13:70778564-70778606	0.0951977	0.00079657	0.020998	Cassette	Pre vs In
FBLN2	13:70778564-70778606	0.0944685	0.000750958	0.0230499	Cassette	Pre vs Post
FBXL2	13:19148281-19148349	0.612308	3.37886e-05	0.00166858	Cassette	Pre vs In
FBXL5	8:10940740-10940797	0.0365385	3.46241e-06	0.000426959	Cassette	In vs Post
FBXL5	8:10940740-10940797	-0.0325464	0.000550007	0.0161582	Cassette	Pre vs In
FBXO16	14:12276044-12276082	0.38125	4.62989e-08	1.02338e-05	Cassette	In vs Post
FBXO25	15:32402318-32402344	0.101095	0.000246082	0.0128271	Cassette	In vs Post
FBXO30	1:19806673-19807072	0.208889	0.00181855	0.0428378	AltStart	Pre vs Post
FBXO34	1:184601178-184601240	0.176322	6.49732e-08	7.14596e-06	Cassette	Pre vs In
FBXO41	3:69511540-69511757	-0.117037	0.000967111	0.0356926	A3SS	In vs Post
FBXW11	16:52251835-52251936	-0.138395	0.000480119	0.0212452	Cassette	In vs Post
FBXW11	16:52251835-52251936	0.337853	1.64513e-08	2.06043e-06	MXE	Pre vs In
FBXW7	8:76664273-76664533	0.132898	0.00210757	0.0429321	AltStart	Pre vs In
FBXW7	8:76664273-76664533	0.175451	0.00107601	0.0297175	AltStart	Pre vs Post
FBXW9	2:66292517-66292577	-0.3125	0.00177425	0.0382874	Cassette	Pre vs In
FCGR1A	4:99226422-99226516	0.769608	0.00010543	0.00684087	Cassette	In vs Post
FCGRT	6:54589913-54589995	-0.155219	0.000156317	0.00593006	A5SS	Pre vs In
FCGRT	6:54589913-54589995	-0.14674	0.00010766	0.00510414	A5SS	Pre vs Post
FEM1B	1:166163084-166163093	-0.283951	2.44894e-05	0.00143896	A3SS	Pre vs Post
FGD2	7:32652246-32652477	-0.632353	6.51884e-05	0.00333108	MXE	Pre vs Post
FGF1	2:144223129-144223216	0.0356723	0.000436841	0.0196987	Cassette	In vs Post
FGFR1OP2	5:46800382-46800421	0.642857	0.00210942	0.0429364	Cassette	Pre vs In
FHL1	X:111310759-111310823	-0.69697	8.87976e-13	3.66734e-10	Cassette	In vs Post
FHL1	X:111310759-111310823	-0.50947	3.52956e-05	0.00198935	Cassette	Pre vs Post
FHL2	3:49417350-49417430	0.345789	9.27374e-06	0.000637631	AltStart	Pre vs Post
FKBP8	2:59256769-59256788	-0.297536	0.00108446	0.0379126	A5SS	In vs Post
FKBP8	2:59256769-59256788	0.380435	0.000249423	0.00859064	A5SS	Pre vs In
FLNB	13:39918953-39919019	0.103153	1.65964e-05	0.000922349	Cassette	Pre vs In
FLNB	13:39918953-39919019	0.100183	0.000207961	0.00880981	Cassette	Pre vs Post
FLOT2	12:45109403-45109493	-0.170641	0.00125778	0.0297895	Cassette	Pre vs In
FMNL1	12:18211446-18211463	0.455204	7.95331e-07	7.3814e-05	Cassette	Pre vs Post
FMNL2	15:60382661-60384154	0.000888099	0.00078957	0.0236491	IR	Pre vs Post
FN1	15:117689285-117689557	-0.198129	0.000115188	0.00539845	Cassette	Pre vs Post
FNBP4	2:14914495-14914597	0.25623	0.000994701	0.0362002	Cassette	In vs Post
FNBP4	2:14914495-14914597	0.264269	7.0222e-07	6.68254e-05	Cassette	Pre vs Post
FOCAD	1:202254539-202254632	0.222853	0.000146006	0.00562865	Cassette_multi	Pre vs In
FOCAD	1:202254539-202254632	0.198661	3.9451e-05	0.00218603	Cassette_multi	Pre vs Post
FOXN3	7:111278916-111279403	0.190819	1.32448e-06	0.000190761	AltStart	In vs Post
FRMD4A	10:47671219-47671284	0.251937	0.000797646	0.0210052	AltStart	Pre vs In
FRMD4A	10:47671219-47671284	0.367378	2.06351e-05	0.00125877	AltStart	Pre vs Post
FRMPD3	X:87988734-87988779	0.393008	2.18819e-05	0.00132121	Cassette	Pre vs Post
FRYL	8:38465376-38465526	-0.0310766	0.000817005	0.0317753	Cassette	In vs Post
FTO	6:31444790-31444825	0.057611	0.00154662	0.0345723	A5SS	Pre vs In
FUS	3:17320712-17320746	0.0248139	0.00153465	0.0483999	Cassette	In vs Post
FXR1	13:118897888-118897979	0.0880151	0.00146335	0.0371352	Cassette_multi	Pre vs Post
FXYD1	6:44667871-44667973	-0.0587712	0.00201439	0.0416446	A5SS	Pre vs In
FYTTD1	13:134387567-134387628	0.547009	0.00109607	0.0381407	MXE	In vs Post
G3BP1	16:71244033-71251171	-0.00626305	0.00137396	0.0318813	AltEnd	Pre vs In
GABARAPL1	5:61759073-61759144	0.00132415	1.4331e-05	0.00134613	IR	In vs Post
GABBR1	7:22557150-22557227	0.334199	0.0016894	0.0370677	MXE	Pre vs In
GAD1	15:76992201-76992387	-0.0606493	0.000184	0.010385	Cassette	In vs Post
GALNT1	6:119398688-119398750	-0.364253	0.000146573	0.00871693	Cassette	In vs Post
GALNT7	14:16736825-16737007	0.395604	2.34937e-06	0.000307178	MXE	In vs Post
GALNT7	14:16736825-16737007	0.255739	0.000224008	0.00929473	MXE	Pre vs Post
GAMT	2:77079157-77079309	0.111613	0.000481999	0.016527	Cassette	Pre vs Post
GAPDH	5:64130647-64130705	-0.000593562	0.000281812	0.00938652	IR	Pre vs In
GAPDH	5:64130647-64130705	-0.000593562	0.000737562	0.0227907	IR	Pre vs Post
GAPVD1	1:265981275-265981355	-0.133184	9.34421e-05	0.00395144	Cassette	Pre vs In
GAS2	2:36848635-36848916	-0.136676	0.00193475	0.0405351	AltStart	Pre vs In
GAS2	2:36792867-36793079	0.541126	0.000199517	0.00853471	Cassette	Pre vs Post
GBA2	1:236469245-236469381	-0.106196	0.000138855	0.00541678	Cassette	Pre vs In
GCA	15:69016550-69016630	-0.0214006	6.86996e-05	0.00306874	AltEnd	Pre vs In
GEMIN2	1:169676778-169676790	0.0850235	8.78834e-05	0.00377121	A5SS	Pre vs In
GFAP	12:18456505-18456668	-0.000139698	2.64431e-12	1.0118e-09	IR	In vs Post
GFAP	12:18461885-18463910	0.0164565	3.71076e-06	0.000449071	IR	In vs Post
GFAP	12:18465047-18466297	-0.000847027	3.86693e-05	0.00308631	IR	In vs Post
GFAP	12:18456505-18456668	0.000139698	6.47121e-26	4.83973e-23	IR	Pre vs In
GFAP	12:18461885-18463910	0.0115036	0.00147309	0.0372743	IR	Pre vs Post
GFPT2	2:78300073-78300180	-0.118812	0.00137508	0.0318813	Cassette	Pre vs In
GFPT2	2:78300073-78300180	-0.118812	0.000133672	0.00608474	Cassette	Pre vs Post
GFRA1	14:126432179-126432193	0.108966	0.000142066	0.00853674	Cassette	In vs Post
GFRA1	14:126432179-126432193	0.134146	0.000553339	0.0183968	Cassette	Pre vs Post
GGACT	11:69348764-69348844	-0.257862	0.0024382	0.0470667	AltStart	Pre vs In
GGT7	17:38245610-38245706	0.0416082	0.000757658	0.0300969	A3SS	In vs Post
GGT7	17:38245610-38245706	-0.0418222	0.000165402	0.00619606	A3SS	Pre vs In
GIGYF2	15:133303626-133303656	-0.6875	0.000656364	0.0270221	A5SS	In vs Post
GIPC2	6:135180748-135180896	0.40625	0.000560149	0.0162884	Cassette_multi	Pre vs In
GJA1	1:40991473-40991648	-0.000597347	8.40589e-07	0.000131755	IR	In vs Post
GJA1	1:40991473-40991648	-0.00111549	4.86553e-07	4.82238e-05	IR	Pre vs Post
GLCCI1	9:78029365-78029472	-0.134691	0.000733686	0.0294595	Cassette	In vs Post
GLCE	1:167101441-167101521	0.0869565	0.00121072	0.0411788	AltStart	In vs Post
GLMN	4:124774169-124774487	0.0612245	2.26566e-06	0.000302309	AltStart	In vs Post
GLMN	4:124774169-124774487	0.0697674	1.98425e-06	0.000167268	AltStart	Pre vs Post
GLRA2	X:11151646-11151713	-0.222308	1.04461e-15	3.79774e-13	MXE	Pre vs In
GLRA2	X:11151646-11151713	-0.213355	2.42747e-12	6.25074e-10	MXE	Pre vs Post
GLRB	8:45919280-45919462	0.0600086	0.000748785	0.0201234	Cassette	Pre vs In
GLRX2	10:679410-679463	0.164242	0.000565593	0.0240539	A5SS	In vs Post
GLRX2	10:683206-683269	-0.0677966	0.000438445	0.0135179	Cassette	Pre vs In
GLRX2	10:683206-683269	-0.057864	0.000886432	0.0257831	Cassette	Pre vs Post
GNAL	6:97408186-97409067	0.0220157	0.000257094	0.0132719	AltStart	In vs Post
GNAL	6:97408951-97409067	-0.521455	1.83455e-05	0.00100253	AltStart	Pre vs In
GNAL	6:97408186-97409067	-0.272016	3.32115e-05	0.00164337	AltStart	Pre vs In
GNAO1	6:29431223-29431376	0.11456	0.000197463	0.00716561	Cassette	Pre vs In
GNAS	17:59033898-59034586	0.00668216	4.35629e-05	0.0033936	Cassette	In vs Post
GNAS	17:59033898-59034586	0.0106047	3.78818e-05	0.00183629	Cassette	Pre vs In
GNAS	17:59032027-59032048	0.0500894	0.000789256	0.0209529	A5SS	Pre vs In
GNAS	17:59042572-59042918	0.000747943	4.08945e-06	0.000310432	IR	Pre vs Post
GNG12	6:144823397-144823477	0.0526316	2.22728e-06	0.000164229	AltStart	Pre vs In
GNG3	2:9054598-9054653	0.284679	3.91765e-06	0.000469739	AltStart	In vs Post
GNG3	2:9054598-9054653	-0.446223	1.56527e-13	3.97791e-11	AltStart	Pre vs In
GNG3	2:9054598-9054653	-0.161544	0.00179777	0.0425391	AltStart	Pre vs Post
GNL3	13:34823037-34823051	-0.21875	0.00122427	0.0292129	A5SS	Pre vs In
GNPDA2	8:35207674-35207737	0.0917547	0.000277466	0.0110085	Cassette	Pre vs Post
GNPDA2	8:35204308-35206445	0.00239429	0.000732429	0.0227128	Cassette_multi	Pre vs Post
GPAM	14:122579074-122579154	0.246795	4.25102e-08	9.53511e-06	AltStart	In vs Post
GPAM	14:122579020-122579074	0.110526	0.00133506	0.0311499	A5SS	Pre vs In
GPATCH2L	7:99350865-99350945	-0.111992	5.22651e-07	8.71722e-05	Cassette	In vs Post
GPCPD1	17:14457301-14457376	0.117422	0.000633079	0.0177441	Cassette_multi	Pre vs In
GPCPD1	17:14457301-14457376	0.0900052	0.00140308	0.0359532	Cassette_multi	Pre vs Post
GPI	6:44057671-44057710	-0.587484	0.000842636	0.032529	A3SS	In vs Post
GPI	6:44057905-44057943	-0.691826	4.58803e-09	6.25501e-07	Cassette	Pre vs In
GPI	6:44057710-44057787	-0.920424	4.14639e-08	4.78132e-06	MXE	Pre vs In
GPI	6:44057567-44057605	0.562399	0.000592914	0.0169619	MXE	Pre vs In
GPI	6:44057866-44057904	-0.661578	6.53923e-08	8.54491e-06	Cassette	Pre vs Post
GPI	6:44057567-44057605	0.562399	9.00099e-06	0.000620501	MXE	Pre vs Post
GPI	6:44057905-44057982	0.024159	0.0003068	0.0118632	Cassette	Pre vs Post
GPR162	5:63888135-63888273	-0.0415537	0.00092195	0.0234756	A5SS	Pre vs In
GPR75	3:87348623-87349522	0.0539497	0.000755154	0.0300649	IR	In vs Post
GPR85	18:32668897-32669017	0.177568	0.000174837	0.0100237	Cassette	In vs Post
GPS1	12:950072-950525	0.0240741	0.00130271	0.0305827	IR	Pre vs In
GPT2	6:37669340-37669574	-0.101196	0.00205842	0.042293	IR	Pre vs In
GRAMD1B	9:50413322-50413344	-0.286184	0.000148504	0.00880167	AltStart	In vs Post
GRAMD1B	9:50444925-50444935	-0.236227	3.6352e-08	4.26704e-06	AltStart	Pre vs In
GRAMD1B	9:50413322-50413344	0.275104	5.18065e-06	0.000345061	AltStart	Pre vs In
GRAMD1B	9:50444495-50444820	-0.126677	0.000406672	0.0127029	AltStart	Pre vs In
GRAMD1C	13:146032392-146032416	-0.16051	0.000137587	0.00834562	Cassette_multi	In vs Post
GRAMD1C	13:146032392-146032416	0.178668	0.000196076	0.00714832	Cassette_multi	Pre vs In
GRAMD4	5:2914892-2914972	-0.262664	0.000333093	0.0124778	AltStart	Pre vs Post
GRB10	9:136741609-136742139	-0.475676	0.000101112	0.00663905	AltStart	In vs Post
GRB10	9:136741609-136742139	0.525676	2.84261e-08	3.38218e-06	AltStart	Pre vs In
GRB14	15:71122159-71122239	-0.238095	0.000567925	0.0241058	AltEnd	In vs Post
GRIA2	8:46236090-46236204	0.178172	3.37313e-08	3.97726e-06	Cassette	Pre vs In
GRIA2	8:46236090-46236204	0.191852	1.02677e-11	2.36562e-09	MXE	Pre vs Post
GRIA3	X:101084412-101084526	0.157889	3.39759e-05	0.00166858	MXE	Pre vs In
GRIA3	X:101084412-101084526	0.183517	1.26128e-08	1.88224e-06	MXE	Pre vs Post
GRIA4	9:35789356-35789470	0.379058	1.07328e-13	2.80941e-11	MXE	Pre vs In
GRIA4	9:35789356-35789470	0.366843	3.08808e-16	1.3082e-13	MXE	Pre vs Post
GRIN1	AEMK02000682.1:744356-744418	0.502945	1.33694e-69	6.99916e-66	Cassette	Pre vs In
GRIN1	AEMK02000682.1:731043-731153	-0.121553	0.000337858	0.0109588	Cassette	Pre vs In
GRIN1	AEMK02000682.1:744356-744418	0.451857	2.19645e-42	3.84598e-39	Cassette	Pre vs Post
GRIN1	AEMK02000682.1:731043-731153	-0.120689	0.000762395	0.023204	Cassette	Pre vs Post
GRIN2B	5:58481397-58481477	-0.141435	0.00146257	0.0332328	AltStart	Pre vs In
GRIP1	5:30729852-30729896	0.283091	0.000474846	0.0144496	Cassette	Pre vs In
GRIP1	5:30737113-30737172	-0.279404	0.000759005	0.0231931	Cassette	Pre vs Post
GRK3	14:43436685-43436720	0.0685206	0.000453388	0.0139233	Cassette	Pre vs In
GRK3	14:43364583-43364656	-0.0414299	0.00123446	0.0293906	Cassette	Pre vs In
GRK3	14:43436685-43436720	0.0812325	2.12801e-07	2.4301e-05	Cassette	Pre vs Post
GRM1	1:19194269-19194363	-0.301724	0.000343399	0.0110973	Cassette	Pre vs In
GRM5	9:22230457-22230537	-0.0208202	0.000880692	0.0336487	AltEnd	In vs Post
GRM5	9:21934296-21934391	-0.199652	3.40187e-07	3.1027e-05	Cassette	Pre vs In
GRM5	9:22230457-22230537	-0.0246394	2.64583e-05	0.00155118	AltEnd	Pre vs Post
GRM8	18:20951003-20951254	-0.286389	3.44629e-06	0.00024056	AltStart	Pre vs In
GRP	1:161714321-161714381	0.245793	0.00109148	0.0298935	Cassette	Pre vs Post
GSDME	18:47527085-47527094	-0.459459	2.84533e-05	0.00165337	A5SS	Pre vs Post
GSK3B	13:140329679-140329717	-0.104604	0.000559222	0.0238531	Cassette	In vs Post
GSN	1:261345025-261345105	0.122591	1.59944e-05	0.00146534	AltStart	In vs Post
GSN	1:261345156-261345226	-0.134353	2.01126e-05	0.00175607	Cassette	In vs Post
GSN	1:261345156-261345226	0.24908	1.70702e-15	6.03823e-13	Cassette	Pre vs In
GSN	1:261326633-261326716	0.0529959	0.00219268	0.0440827	Cassette_multi	Pre vs In
GSN	1:261345025-261345105	0.127869	7.82854e-06	0.000548311	AltStart	Pre vs Post
GSN	1:261345156-261345226	0.119106	9.29793e-05	0.00451405	Cassette	Pre vs Post
GSTA4	7:46655867-46656398	0.0138665	0.000701729	0.0284397	A5SS	In vs Post
GSTA4	7:46655430-46656398	0.0858361	0.00090016	0.034207	IR	In vs Post
GTDC1	15:8090467-8090547	-0.195386	0.00152333	0.0483359	AltStart	In vs Post
GTF2I	3:11758388-11758431	-0.0367608	0.000279098	0.0141833	Cassette	In vs Post
GULP1	15:93222772-93222795	0.270961	1.1884e-06	9.39806e-05	Cassette	Pre vs In
GULP1	15:93245998-93246008	0.45	0.000100368	0.00419745	Cassette	Pre vs In
GULP1	15:93237260-93237484	0.155634	0.0007027	0.0192204	Cassette	Pre vs In
GULP1	15:93222772-93222795	0.245178	5.98821e-07	5.7986e-05	Cassette	Pre vs Post
GULP1	15:93245998-93246008	0.45	1.92121e-05	0.00117898	Cassette	Pre vs Post
GULP1	15:93237260-93237484	0.182297	4.1732e-05	0.00226934	Cassette	Pre vs Post
H2AFY	2:137553762-137553861	-0.119019	0.000420233	0.0130284	MXE	Pre vs In
H2AFY	2:137551732-137551822	0.151662	3.03353e-07	3.27884e-05	Cassette	Pre vs Post
H2AFY	2:137553762-137553861	-0.162533	3.59603e-07	3.76294e-05	MXE	Pre vs Post
HAP1	12:20946442-20946480	-0.0793135	1.06511e-05	0.000635086	Cassette	Pre vs In
HAPLN1	2:91897335-91897415	0.403054	1.58133e-07	1.56791e-05	AltStart	Pre vs In
HAPLN1	2:91897335-91897415	0.424907	1.14671e-09	1.96851e-07	AltStart	Pre vs Post
HDAC1	6:88786535-88786604	0.00763359	0.00110769	0.0384792	IR	In vs Post
HDAC1	6:88787054-88787083	0.11669	0.000146378	0.00563015	Cassette	Pre vs In
HDAC1	6:88787054-88787083	0.108955	0.000169018	0.00746092	Cassette	Pre vs Post
HDAC1	6:88786535-88786604	0.00763359	0.00110355	0.0300985	IR	Pre vs Post
HDHD3	1:254007095-254007128	-0.434783	3.86268e-05	0.00308631	A3SS	In vs Post
HERC1	1:108312706-108312771	0.220005	2.0798e-09	3.00778e-07	Cassette	Pre vs In
HERC1	1:108311299-108311388	-0.236293	7.75295e-06	0.00048667	MXE	Pre vs In
HERC1	1:108312706-108312771	0.197574	6.19189e-09	9.62308e-07	Cassette_multi	Pre vs Post
HERC2	15:56554675-56554719	0.0332247	0.000941303	0.0348886	Cassette	In vs Post
HFM1	4:125531296-125531408	0.51641	9.00985e-08	1.78952e-05	Cassette	In vs Post
HFM1	4:125523927-125524007	0.416667	0.00156496	0.0349227	AltStart	Pre vs In
HFM1	4:125531296-125531408	0.367843	0.000901847	0.0261446	Cassette	Pre vs Post
HHIPL2	10:11340998-11341078	0.471111	2.18502e-08	2.64792e-06	AltEnd	Pre vs In
HHIPL2	10:11340998-11341078	0.26231	0.00153192	0.0383565	AltEnd	Pre vs Post
HIVEP2	1:22300514-22300594	0.294118	0.000721804	0.0291017	AltStart	In vs Post
HIVEP2	1:22285747-22285821	0.315493	0.000932352	0.0236485	Cassette	Pre vs In
HIVEP2	1:22300514-22300594	-0.27525	0.00139193	0.0320083	AltStart	Pre vs In
HK3	2:80966680-80966686	-0.319504	1.39037e-05	0.000796374	A5SS	Pre vs In
HM13	17:35257187-35257315	-0.14895	0.00222253	0.0443481	Cassette	Pre vs In
HMBOX1	14:12794474-12794559	0.0195865	0.00146859	0.0371964	Cassette	Pre vs Post
HMBOX1	14:12879763-12879867	0.133888	0.00148171	0.0373883	Cassette	Pre vs Post
HMG20B	2:75098429-75098456	-0.512384	0.000204558	0.00732489	A5SS	Pre vs In
HMGCLL1	7:25670648-25670751	0.0335968	0.000305396	0.0100807	Cassette	Pre vs In
HMGCLL1	7:25670648-25670751	0.0335968	0.000388787	0.0140848	Cassette	Pre vs Post
HMGN3	1:86986528-86986570	0.0504984	0.000311149	0.0119478	Cassette	Pre vs Post
HNRNPA2B1	18:46214347-46214639	-0.0372671	0.000160574	0.00712411	IR	Pre vs Post
HNRNPA2B1	18:46205621-46208495	-0.0647684	0.000970468	0.0275859	IR	Pre vs Post
HNRNPH1	2:78968915-78969004	0.262367	7.24029e-09	1.94211e-06	MXE	In vs Post
HNRNPH1	2:78962466-78962546	-0.028539	0.000995177	0.024791	AltStart	Pre vs In
HNRNPH1	2:78968915-78969004	0.208331	8.98284e-06	0.000620501	MXE	Pre vs Post
HNRNPLL	3:101779712-101779793	0.119188	0.000223369	0.0119585	Cassette	In vs Post
HNRNPLL	3:101792142-101792183	0.0825701	0.00248084	0.0477802	Cassette	Pre vs In
HNRNPM	2:70814167-70814255	0.015268	0.000785212	0.0235968	A3SS	Pre vs Post
HOOK2	2:66235159-66235193	0.428922	0.00025814	0.0104148	Cassette	Pre vs Post
HPF1	14:20026281-20026361	0.0335731	4.53969e-05	0.00243834	AltEnd	Pre vs Post
HPS3	13:89402534-89402638	0.14955	0.000358525	0.0132071	MXE	Pre vs Post
HPS4	14:44051673-44051683	-0.333333	0.000961633	0.0274734	Cassette	Pre vs Post
HSD11B1L	2:73288292-73288479	0.0953469	3.60532e-05	0.00290424	IR	In vs Post
HSDL2	1:253124560-253124804	0.274426	4.61656e-05	0.00247457	A5SS	Pre vs Post
HSF1	4:453344-453424	0.151515	0.0016159	0.0399251	AltEnd	Pre vs Post
IFIT2	14:101193621-101193701	0.158461	0.00102608	0.0287313	AltStart	Pre vs Post
IFITM10	2:1183812-1183859	-0.343874	0.0010422	0.0370025	AltStart	In vs Post
IFT122	13:68877988-68878010	-0.109711	0.00165904	0.0364933	A5SS	Pre vs In
IL10RB	13:196801973-196802293	0.340075	2.38169e-05	0.00140432	AltStart	Pre vs Post
ILVBL	2:62435855-62435882	-0.0702479	0.000213423	0.0115448	AltStart	In vs Post
IMMT	3:58614835-58614915	-0.532413	1.46512e-08	3.63057e-06	AltEnd	In vs Post
IMMT	3:58614835-58614915	-0.527533	1.51522e-07	1.77666e-05	AltEnd	Pre vs Post
INO80D	15:109375634-109375748	-0.138009	0.000819201	0.0213155	AltStart	Pre vs In
INO80E	3:18206036-18206147	-0.0680628	0.00154378	0.0345613	Cassette_multi	Pre vs In
INPP4A	3:55741971-55741988	-0.154053	2.55482e-05	0.00132952	Cassette	Pre vs In
INPP5F	14:129655287-129662284	-0.0295522	6.70508e-05	0.0030105	A5SS	Pre vs In
INTS10	17:12044658-12044735	0.264285	0.00020797	0.0113365	Cassette	In vs Post
INTS10	17:12044658-12044735	-0.293942	3.7876e-05	0.00183629	Cassette	Pre vs In
INTS2	12:36434498-36434507	0.777778	0.000454303	0.0139249	A5SS	Pre vs In
INTS2	12:36434498-36434507	0.714286	0.000794883	0.0237245	A5SS	Pre vs Post
INTS9	14:12676029-12676209	0.217586	7.57874e-05	0.00523054	Cassette	In vs Post
INTS9	14:12676029-12676209	-0.275862	8.81681e-05	0.00377199	Cassette	Pre vs In
INTU	8:97204439-97204659	0.165714	9.55847e-05	0.00461495	AltStart	Pre vs Post
IQGAP1	7:53109097-53109144	-0.231707	0.000715579	0.0223215	Cassette	Pre vs Post
IQSEC1	13:71229511-71229555	-0.243475	8.05085e-06	0.000848078	Cassette	In vs Post
IQSEC1	13:71277760-71277840	-0.0685714	7.46907e-05	0.00516856	AltStart	In vs Post
IQSEC1	13:71277760-71277840	-0.0629535	0.000153421	0.00682983	AltStart	Pre vs Post
IQSEC1	13:71261113-71261267	0.104918	0.000669918	0.0212248	AltStart	Pre vs Post
IRF7	2:372439-372510	0.333538	0.000465875	0.0161427	IR	Pre vs Post
ISG15	6:63363057-63363279	-0.00117517	0.000185328	0.0104148	A5SS	In vs Post
ISG15	6:63365131-63365245	0.0624157	0.000854648	0.0328465	IR	In vs Post
ISG15	6:63365131-63365245	0.0515385	0.00143263	0.0365676	IR	Pre vs Post
ISLR2	7:59391163-59391228	0.409091	0.000542902	0.016019	A5SS	Pre vs In
ITGA2B	12:18836411-18836447	-0.608511	5.91858e-06	0.000672469	Cassette	In vs Post
ITGA2B	12:18845606-18845655	0.168642	0.000200568	0.00722156	Cassette_multi	Pre vs In
ITGA2B	12:18836411-18836447	0.397403	0.00126035	0.0298021	Cassette	Pre vs In
ITGA2B	12:18784316-18784396	0.0598086	0.00230646	0.0455285	AltStart	Pre vs In
ITGA2B	12:18845606-18845655	0.15824	0.000279205	0.0110608	Cassette_multi	Pre vs Post
ITGA2B	12:18784316-18784396	0.0598086	0.000438818	0.0154913	AltStart	Pre vs Post
ITGAE	12:49819875-49819970	0.131488	0.000371911	0.0178538	Cassette	In vs Post
ITGAE	12:49819875-49819970	-0.207197	1.81249e-07	1.77029e-05	Cassette	Pre vs In
ITGB1BP1	3:126919293-126919442	-0.0780781	0.00014833	0.00565989	Cassette	Pre vs In
ITM2C	15:131627787-131627904	0.000453309	0.0004806	0.0145942	IR	Pre vs In
ITPKB	10:14387850-14387930	-0.0789474	0.000633138	0.0177441	AltStart	Pre vs In
ITPKB	10:14387850-14387930	-0.0714286	0.00214719	0.0487012	AltStart	Pre vs Post
ITPR1	13:61277966-61288016	0.369607	0.00052876	0.0228915	Cassette_multi	In vs Post
ITPR1	13:61277966-61288016	0.399587	0.000104061	0.00495142	Cassette_multi	Pre vs Post
ITSN2	3:114431914-114431994	0.146207	0.0014678	0.033297	Cassette	Pre vs In
ITSN2	3:114431914-114431994	0.216428	3.07205e-07	3.29836e-05	Cassette	Pre vs Post
JADE2	2:136782779-136782853	0.52	0.00133801	0.0347604	Cassette	Pre vs Post
JAM3	9:60709769-60709794	0.110535	2.95266e-18	1.87379e-15	IR	In vs Post
JAM3	9:60709769-60709794	0.110535	7.91229e-10	2.36632e-07	IR	In vs Post
JAM3	9:60709769-60709794	-0.0547891	4.88779e-07	4.30784e-05	IR	Pre vs In
JAM3	9:60709769-60709794	0.055746	2.0982e-05	0.00127273	IR	Pre vs Post
JDP2	7:98575685-98575722	0.230349	0.000111354	0.00706423	AltStart	In vs Post
JDP2	7:98575685-98575722	-0.183732	0.00157759	0.0351446	AltStart	Pre vs In
JKAMP	1:188600586-188600604	-0.217555	0.00150219	0.0339268	A3SS	Pre vs In
KANSL1	12:16935000-16935605	-0.302304	4.93582e-07	4.33557e-05	AltStart	Pre vs In
KAT2A	12:20647944-20647993	-0.178571	6.49812e-06	0.000713395	A5SS	In vs Post
KAT2A	12:20648128-20648296	-0.0847926	1.56118e-05	0.00143535	Cassette	In vs Post
KAT2A	12:20647944-20647993	-0.151786	3.26339e-05	0.00185929	A5SS	Pre vs Post
KCNA2	4:109556425-109556505	-0.240164	0.00143709	0.032825	AltStart	Pre vs In
KCNA2	4:109556425-109556505	-0.352502	1.98696e-06	0.000167268	AltStart	Pre vs Post
KCNA6	5:65633955-65634199	0.119018	2.69297e-07	2.99707e-05	Cassette	Pre vs Post
KCNAB2	6:67005796-67005840	0.0880409	1.52645e-07	1.51926e-05	Cassette	Pre vs In
KCNAB2	6:67005796-67005840	0.0868335	1.53421e-06	0.000132552	Cassette	Pre vs Post
KCNAB3	12:53171319-53172328	0.463778	7.73417e-06	0.000544467	AltEnd	Pre vs Post
KCNAB3	12:53171319-53176475	0.342604	0.00171905	0.041499	AltEnd	Pre vs Post
KCNC2	5:38328843-38328937	-0.172041	6.13964e-07	5.28655e-05	Cassette	Pre vs In
KCNC2	5:38531633-38531713	-0.052968	0.00195886	0.0409546	AltStart	Pre vs In
KCNC2	5:38328843-38328937	-0.163725	4.67589e-08	6.23412e-06	Cassette	Pre vs Post
KCNC2	5:38327625-38327705	-0.108327	0.000175357	0.00770194	AltEnd	Pre vs Post
KCNC2	5:38531633-38531713	-0.0798686	0.000237928	0.00979496	AltStart	Pre vs Post
KCNH2	18:6269199-6269279	0.107527	0.00231754	0.0456462	AltStart	Pre vs In
KCNH7	15:69200909-69200932	-0.400825	1.53555e-05	0.000983687	Cassette	Pre vs Post
KCNIP2	14:112861794-112861893	0.204375	0.000691388	0.0281955	Cassette_multi	In vs Post
KCNIP4	8:15350308-15350461	0.407496	3.79295e-09	5.20982e-07	AltStart	Pre vs In
KCNIP4	8:15350308-15350461	0.565267	7.51913e-15	2.70534e-12	AltStart	Pre vs Post
KCNJ6	13:201523087-201523167	0.0869298	0.000969847	0.0243401	AltStart	Pre vs In
KCNK10	7:110267095-110267626	0.297271	0.00106371	0.0374514	AltStart	In vs Post
KCNMA1	14:79360136-79360164	0.373673	6.36252e-07	5.44265e-05	Cassette	Pre vs In
KCNMA1	14:79360136-79360164	0.290246	8.49565e-05	0.00419433	Cassette	Pre vs Post
KCNQ2	17:62474045-62474098	-0.111693	0.000205206	0.0112169	Cassette	In vs Post
KCNQ2	17:62474045-62474098	0.111987	0.000170094	0.006331	Cassette	Pre vs In
KCNT2	AEMK02000698.1:2126645-2126665	-0.192823	6.13263e-05	0.00438365	Cassette	In vs Post
KCTD3	10:5795439-5795690	0.0285714	0.000971741	0.0358127	AltStart	In vs Post
KDM6A	X:40101631-40101765	0.214018	0.000216188	0.00766792	Cassette	Pre vs In
KDM6A	X:40101631-40101765	0.277778	0.000500437	0.0170923	MXE	Pre vs Post
KHNYN	7:74851820-74851884	0.0479665	0.00222713	0.0443663	A3SS	Pre vs In
KHNYN	7:74851244-74851315	-0.269447	0.000264526	0.0105985	A3SS	Pre vs Post
KHSRP	2:72656966-72657112	-0.226151	0.00121304	0.0289976	IR	Pre vs In
KIAA0408	1:35777210-35777235	0.114833	0.000639592	0.0178486	IR	Pre vs In
KIAA0408	1:35777210-35777235	0.2	0.000286613	0.0113031	IR	Pre vs Post
KIAA0513	6:3733924-3733953	0.163936	3.55049e-07	3.227e-05	Cassette	Pre vs In
KIAA0513	6:3733924-3733953	0.140993	6.32316e-05	0.00325006	Cassette	Pre vs Post
KIAA0556	3:19240687-19240768	0.27381	0.00192624	0.0404664	A3SS	Pre vs In
KIAA0930	5:4152267-4152376	0.138836	7.90835e-05	0.00540072	IR	In vs Post
KIAA0930	5:4152267-4152376	-0.242366	4.30166e-08	4.93861e-06	IR	Pre vs In
KIAA1211	8:55556392-55556413	0.330836	8.44494e-11	1.50377e-08	Cassette	Pre vs In
KIAA1211	8:55556392-55556413	0.368988	3.89968e-11	8.194e-09	Cassette	Pre vs Post
KIAA1211	8:55388744-55388827	-0.373856	9.6323e-06	0.000655426	Cassette	Pre vs Post
KIAA1211	8:55477082-55477165	-0.168561	0.000128241	0.00587826	Cassette	Pre vs Post
KIAA1217	10:51031482-51031611	-0.379144	6.16881e-06	0.000453848	AltStart	Pre vs Post
KIAA1324L	9:93688826-93688906	-0.18913	1.87853e-08	2.7564e-06	AltStart	Pre vs Post
KIAA1328	6:120925079-120925186	-0.144357	0.000691935	0.0216353	Cassette	Pre vs Post
KIAA2026	1:216190515-216190560	-0.0603426	0.000241643	0.00841123	A3SS	Pre vs In
KIAA2026	1:216148995-216149195	0.0621838	0.00134441	0.0313368	Cassette	Pre vs In
KIF20B	14:101586662-101586730	-0.502262	0.00029573	0.0115989	Cassette	Pre vs Post
KIF21A	5:70939250-70939288	0.148307	1.26612e-06	9.95258e-05	Cassette	Pre vs In
KIF21A	5:70939250-70939288	0.132995	1.07206e-05	0.000716482	Cassette	Pre vs Post
KIF21B	10:23449492-23449667	-0.292857	0.00120131	0.0410735	AltEnd	In vs Post
KIF3B	17:35939005-35939254	0.592593	6.0858e-10	1.8629e-07	Cassette	In vs Post
KIF3B	17:35939005-35939254	-0.592593	5.1685e-10	8.24943e-08	Cassette	Pre vs In
KIF4A	X:56317981-56318064	0.0486996	0.00253878	0.0487564	Cassette	Pre vs In
KIFAP3	4:81100354-81100422	0.111078	0.000100543	0.00419745	Cassette	Pre vs In
KIFAP3	4:81100354-81100422	0.126158	2.12772e-05	0.00128766	Cassette	Pre vs Post
KITLG	5:94085869-94085952	0.0796366	0.000261886	0.0105336	Cassette	Pre vs Post
KLF12	11:46459363-46459443	-0.2411	0.00047307	0.0144157	AltStart	Pre vs In
KLF16	2:76688200-76688280	0.267857	3.80559e-05	0.00184131	AltStart	Pre vs In
KLF6	10:66490568-66490635	-0.15522	0.00023123	0.0122284	Cassette	In vs Post
KLHDC10	18:18700572-18700658	0.139926	0.00105016	0.0371758	Cassette	In vs Post
KLHDC10	18:18700572-18700658	-0.209031	5.604e-05	0.00259629	Cassette	Pre vs In
KLHDC2	1:179671871-179671951	0.996337	0	0	AltStart	In vs Post
KLHDC2	1:179670900-179670980	0.905336	6.14197e-149	7.9904e-145	AltEnd	In vs Post
KLHDC2	1:179611458-179611610	0.936044	3.3087e-52	1.43482e-48	AltStart	In vs Post
KLHDC2	1:179611458-179614464	0.928218	3.53851e-38	1.31526e-34	AltStart	In vs Post
KLHDC2	1:179622531-179637964	0.918385	1.74717e-32	5.05106e-29	AltEnd	In vs Post
KLHDC2	1:179457255-179457281	0.56027	5.20687e-31	1.23161e-27	A5SS	In vs Post
KLHDC2	1:179669750-179670980	0.913478	1.24169e-27	1.7004e-24	AltEnd	In vs Post
KLHDC2	1:179686526-179686561	1	7.47212e-27	9.25795e-24	MXE	In vs Post
KLHDC2	1:179686645-179686725	-0.257627	7.06796e-11	2.32786e-08	AltEnd	In vs Post
KLHDC2	1:179646382-179648803	-0.412928	4.0224e-06	0.000477895	A5SS	In vs Post
KLHDC2	1:179686502-179686520	-0.11218	1.83174e-05	0.0016378	Cassette	In vs Post
KLHDC2	1:179672058-179672081	0.560834	1.46849e-18	7.25268e-16	A5SS	Pre vs In
KLHDC2	1:179671871-179671950	-0.166905	4.16993e-05	0.00200279	A5SS	Pre vs In
KLHDC2	1:179686547-179686560	0.696774	8.02292e-05	0.00348851	A3SS	Pre vs In
KLHDC2	1:179686462-179686482	-0.574897	0.000982661	0.024591	A5SS	Pre vs In
KLHDC2	1:179668781-179668878	-0.078234	0.00117549	0.0282243	Cassette	Pre vs In
KLHDC2	1:179670900-179670980	0.887931	1.792e-171	4.70669e-167	AltEnd	Pre vs Post
KLHDC2	1:179686526-179686612	0.749814	3.25916e-118	2.8534e-114	Cassette_multi	Pre vs Post
KLHDC2	1:179611458-179611610	0.877491	4.46558e-44	8.37775e-41	AltStart	Pre vs Post
KLHDC2	1:179622531-179637964	0.890825	2.02757e-33	2.21892e-30	AltEnd	Pre vs Post
KLHDC2	1:179669750-179670980	0.895285	6.69511e-33	7.03388e-30	AltEnd	Pre vs Post
KLHDC2	1:179611458-179614464	0.889956	5.74673e-31	5.8053e-28	AltStart	Pre vs Post
KLHDC2	1:179457208-179457281	-0.362587	1.07326e-12	3.03111e-10	A5SS	Pre vs Post
KLHDC2	1:179671871-179671929	0.958621	6.00562e-12	1.46053e-09	A3SS	Pre vs Post
KLHDC2	1:179646382-179648803	-0.409238	1.12462e-07	1.38028e-05	A5SS	Pre vs Post
KLHL13	X:96622361-96622426	-0.0842872	0.000102476	0.00426456	Cassette	Pre vs In
KLHL13	X:96612270-96612350	0.0650957	0.000178602	0.00659393	AltStart	Pre vs In
KLHL24	13:121566793-121566879	0.14676	0.00108372	0.0298935	Cassette	Pre vs Post
KLHL32	1:64099220-64099307	-0.261714	1.8784e-07	3.55076e-05	Cassette	In vs Post
KLHL32	1:64127965-64128005	-0.164548	4.57799e-05	0.00351371	Cassette	In vs Post
KLHL32	1:64099220-64099307	0.216506	1.13349e-06	8.99096e-05	Cassette	Pre vs In
KLHL32	1:64233579-64233794	0.0730769	0.0018665	0.0437321	Cassette	Pre vs Post
KMT2C	18:5106592-5106675	0.0878993	0.00197205	0.0411427	Cassette	Pre vs In
KMT2C	18:5106592-5106675	0.0822501	0.00169464	0.0410913	Cassette	Pre vs Post
KMT2E	9:104931112-104931195	0.285134	1.8728e-06	0.000140466	Cassette	Pre vs In
KMT2E	9:104931112-104931195	0.21757	0.000739483	0.0227964	Cassette	Pre vs Post
KPNA1	13:138077482-138077604	0.0988595	0.000416589	0.0192421	Cassette	In vs Post
KPNA1	13:138077482-138077604	-0.117096	1.13148e-05	0.000671603	Cassette	Pre vs In
KPNA6	6:88637824-88637842	-0.027027	0.00217143	0.0491238	A5SS	Pre vs Post
KPTN	6:53244921-53245005	0.0924256	0.000387217	0.0123157	Cassette	Pre vs In
L3MBTL2	5:7275968-7276048	0.102941	0.000483078	0.0146524	AltStart	Pre vs In
LACTB2	4:64723673-64723731	0.0687807	0.002183	0.0492379	Cassette	Pre vs Post
LARP7	8:110080032-110080051	0.0837095	7.16055e-05	0.00499492	A3SS	In vs Post
LARP7	8:110080032-110080051	-0.0856805	7.28473e-05	0.00321836	A3SS	Pre vs In
LAT2	3:11363465-11363495	-0.0608268	7.07534e-05	0.00494875	Cassette	In vs Post
LAT2	3:11363363-11363383	-0.0949569	0.000342595	0.0168188	A5SS	In vs Post
LAT2	3:11363363-11363383	-0.148925	7.75293e-06	0.000544467	A5SS	Pre vs Post
LAT2	3:11363465-11363495	-0.0813343	1.0473e-05	0.000701721	Cassette	Pre vs Post
LCORL	8:12922518-12922598	-0.122353	0.000607421	0.0253683	AltStart	In vs Post
LCORL	8:12922518-12922598	0.12143	0.000810861	0.0211827	AltStart	Pre vs In
LCP1	11:21199735-21199761	-0.168416	0.000492115	0.0148405	Cassette	Pre vs In
LDLRAD3	2:24994947-24995027	-0.185965	3.07671e-07	3.29836e-05	AltEnd	Pre vs Post
LEF1	8:113913692-113913775	0.376404	0.000131539	0.00521329	Cassette	Pre vs In
LEF1	8:113928822-113928862	-0.245147	6.22655e-06	0.000456817	Cassette_multi	Pre vs Post
LGALS8	14:54890337-54890398	0.393585	6.61531e-06	0.000723209	Cassette	In vs Post
LGALS8	14:54877267-54877323	0.0766931	0.000357321	0.0172169	Cassette	In vs Post
LGALS8	14:54877267-54877323	-0.105037	8.43169e-06	0.00052112	Cassette	Pre vs In
LGALS8	14:54890337-54890398	0.293933	0.00136515	0.0352911	Cassette	Pre vs Post
LGMN	7:114209953-114209962	0.253216	4.41075e-05	0.00341557	A5SS	In vs Post
LHX8	6:138101487-138101559	-0.310909	0.000947019	0.0350505	Cassette	In vs Post
LIAS	8:30699457-30699558	0.188766	0.000178238	0.0101037	A5SS	In vs Post
LIAS	8:30699457-30699558	0.316749	3.40732e-08	4.66111e-06	A5SS	Pre vs Post
LIFR	16:23690581-23690661	-0.282952	6.3929e-08	1.34143e-05	AltStart	In vs Post
LIFR	16:23703484-23703564	-0.0593967	0.000534709	0.0230306	AltEnd	In vs Post
LIFR	16:23685761-23685841	0.601024	0.0014941	0.0338027	AltStart	Pre vs In
LIFR	16:23672135-23672215	0.0805768	8.62936e-06	0.000599604	AltStart	Pre vs Post
LIFR	16:23685761-23685841	0.977186	0.000510863	0.0173133	AltStart	Pre vs Post
LIMCH1	8:32790872-32790897	0.712121	1.36894e-05	0.000787544	IR	Pre vs In
LIMCH1	8:32790872-32790897	0.592308	0.000601037	0.0194412	IR	Pre vs Post
LIMK1	3:11253398-11253478	-0.0723443	6.21644e-05	0.00441928	AltStart	In vs Post
LIMK2	14:47964094-47964147	0.107611	0.000642945	0.0265536	Cassette_multi	In vs Post
LIN54	8:135332988-135333363	0.296682	0.000355526	0.0171878	AltStart	In vs Post
LIN54	8:135332988-135333363	-0.364583	3.98649e-07	3.58593e-05	AltStart	Pre vs In
LIN54	8:135331166-135331836	0.273118	0.00058404	0.0190587	AltStart	Pre vs Post
LIN7A	5:100625439-100625515	0.219114	0.00110654	0.0268441	Cassette	Pre vs In
LIPA	14:101147642-101147748	-0.0460621	0.000532922	0.0178265	Cassette	Pre vs Post
LMBR1	18:1929401-1929562	0.145813	4.76191e-07	8.09804e-05	Cassette	In vs Post
LMBR1	18:1929401-1929562	0.162209	8.7509e-08	1.10501e-05	Cassette	Pre vs Post
LMBR1	18:1850543-1850646	0.045593	0.00143555	0.0366065	Cassette	Pre vs Post
LMBRD1	1:49915449-49915472	0.0610399	0.000421675	0.0150275	Cassette	Pre vs Post
LMBRD2	16:21427032-21427134	-0.0332234	0.000689441	0.0216346	A3SS	Pre vs Post
LMF1	3:40928568-40928679	0.122176	0.00109715	0.0267312	A5SS	Pre vs In
LMF1	3:40928414-40928443	-0.3	0.00156996	0.0391223	A3SS	Pre vs Post
LMO7	11:48029502-48029573	-0.490012	1.79595e-05	0.000985552	AltStart	Pre vs In
LMO7	11:48077009-48077287	-0.425532	0.000106381	0.00441304	Cassette_multi	Pre vs In
LPGAT1	9:131427406-131427444	-0.461538	0.00011132	0.00706423	AltStart	In vs Post
LPIN1	3:125020913-125021045	-0.533972	1.38988e-05	0.000796374	AltStart	Pre vs In
LPIN1	3:124978403-124978480	-0.262155	0.000511692	0.0152205	Cassette	Pre vs In
LRCH1	11:20728111-20728215	0.269959	0.000140747	0.00548242	Cassette	Pre vs In
LRCH3	13:134506031-134506084	0.223725	1.04403e-05	0.000625368	Cassette	Pre vs In
LRCH3	13:134506031-134506084	0.240933	4.81798e-07	4.79334e-05	Cassette	Pre vs Post
LRIG1	13:47949921-47950001	0.0316742	0.00207817	0.0425319	AltStart	Pre vs In
LRRC28	1:138105249-138105329	-0.0574163	0.000468928	0.0208565	AltStart	In vs Post
LRRC49	1:168559985-168560094	0.492063	0.000280871	0.00938652	MXE	Pre vs In
LRRC49	1:168559985-168560094	0.477778	0.000636007	0.0203078	MXE	Pre vs Post
LRRC4C	2:21511003-21511083	0.230004	0.00211367	0.042956	MXE	Pre vs In
LRTM2	5:68828240-68828320	-0.159936	0.00152554	0.0343654	AltStart	Pre vs In
LSM14B	17:61556917-61556996	0.124489	0.000576818	0.016647	Cassette	Pre vs In
LSS	AEMK02000328.1:532749-532799	0.0192678	0.0014544	0.0331047	Cassette	Pre vs In
LTO1	2:3608478-3608558	0.0841064	0.00104034	0.025618	AltStart	Pre vs In
LUZP1	6:81000358-81000463	-0.255892	0.00032974	0.0163108	Cassette	In vs Post
LYRM7	2:133480349-133480429	0.204198	6.05739e-05	0.00435379	AltStart	In vs Post
LYRM7	2:133576999-133577079	0.148571	1.4908e-05	0.000839209	AltStart	Pre vs In
LYSMD2	1:120026826-120027019	-0.154583	0.0012478	0.0296123	AltStart	Pre vs In
LZIC	6:70264128-70264209	-0.0648737	2.60137e-05	0.00135106	Cassette	Pre vs In
LZIC	6:70264128-70264209	-0.0830189	9.25232e-12	2.15055e-09	Cassette	Pre vs Post
LZTFL1	13:28990147-28990271	-0.0322581	0.000241525	0.00989651	Cassette	Pre vs Post
LZTS2	14:112081315-112081358	0.113636	0.000128688	0.00793442	Cassette	In vs Post
LZTS2	14:112081315-112081358	-0.255319	4.59228e-10	7.46631e-08	Cassette	Pre vs In
LZTS3	17:32508693-32508829	-0.148214	0.00139278	0.0320083	AltStart	Pre vs In
MACF1	6:95276463-95276471	-0.0563321	7.41278e-05	0.00514328	Cassette	In vs Post
MACF1	6:95252526-95252643	0.516129	0.000327671	0.0162394	A3SS	In vs Post
MACF1	6:95305578-95305646	0.154262	5.65284e-11	1.04142e-08	Cassette	Pre vs In
MACF1	6:95276463-95276471	0.0895934	4.35885e-08	4.98242e-06	Cassette	Pre vs In
MACF1	6:95296169-95296183	0.0867302	0.0013733	0.0318813	Cassette	Pre vs In
MACF1	6:95305578-95305646	0.164039	3.62129e-13	1.08083e-10	Cassette	Pre vs Post
MACF1	6:95301709-95301726	0.0611661	0.00099479	0.0280408	Cassette	Pre vs Post
MACROD1	2:8087355-8087391	0.209164	0.000645637	0.0179981	Cassette	Pre vs In
MACROD1	2:8087355-8087391	0.312229	6.89531e-06	0.000501677	Cassette	Pre vs Post
MAG	6:44808412-44808450	-0.0548187	0.00114167	0.0307865	Cassette	Pre vs Post
MAGI2	9:101460171-101460251	-0.241466	0.000273665	0.00919561	AltStart	Pre vs In
MAGI2	9:102113799-102113821	0.178431	0.0010266	0.0253751	A3SS	Pre vs In
MAGI2	9:101999226-101999267	-0.304621	1.3084e-05	0.00084852	Cassette	Pre vs Post
MAN2A1	2:114792555-114792562	-0.455172	0.000543532	0.0232985	A5SS	In vs Post
MAN2A1	2:114792555-114792562	-0.571839	0.00021261	0.00887789	A5SS	Pre vs Post
MAN2A2	7:53514150-53514224	0.115118	1.71971e-05	0.000951696	Cassette	Pre vs In
MAN2A2	7:53514150-53514224	0.100428	0.000288107	0.011345	Cassette	Pre vs Post
MAP2	15:112255664-112255720	-0.0395334	0.00159682	0.049864	AltStart	In vs Post
MAP2	15:112388499-112388677	-0.0610661	0.000245244	0.0084914	AltStart	Pre vs In
MAP2	15:112461085-112461379	-0.00669643	0.00103051	0.0254477	IR	Pre vs In
MAP2	15:112461085-112461379	-0.00669643	5.32554e-06	0.000399644	IR	Pre vs Post
MAP2	15:112388499-112388677	-0.0584283	0.000691687	0.0216353	AltStart	Pre vs Post
MAP2	15:112255664-112255720	-0.0340327	0.00219824	0.0493603	AltStart	Pre vs Post
MAP2K7	2:71306023-71306070	-0.118066	8.42016e-05	0.00572022	Cassette	In vs Post
MAP3K10	6:48536009-48536100	-0.0736685	0.00102656	0.0253751	Cassette	Pre vs In
MAP3K4	1:6912681-6912705	-0.789474	1.32509e-06	0.000103849	MXE	Pre vs In
MAP4K4	3:52514123-52514356	0.107621	0.000838658	0.0247181	Cassette	Pre vs Post
MAP4K5	1:180195660-180195673	-0.0681673	0.00106289	0.0374514	A5SS	In vs Post
MAP4K5	1:180195660-180195673	-0.0661133	0.000788902	0.0236491	A5SS	Pre vs Post
MAP4K5	1:180264807-180264887	0.0795996	0.00157806	0.0392497	AltEnd	Pre vs Post
MAP7	1:27625996-27626076	-0.419444	0.000315207	0.0156814	AltStart	In vs Post
MAP7	1:27625996-27626076	0.444444	0.000157116	0.00595176	AltStart	Pre vs In
MAP7	1:27748633-27748743	-0.0819363	0.00241021	0.0466985	Cassette	Pre vs In
MAP7D2	X:16371793-16371891	-0.0582977	0.000279759	0.0110661	Cassette	Pre vs Post
MAPK10	8:132746838-132746857	0.3243	0.000385039	0.0182828	A5SS	In vs Post
MAPK10	8:132746838-132746857	-0.381443	1.41847e-14	4.31743e-12	A5SS	Pre vs In
MAPK10	8:132746879-132746890	0.381443	1.91997e-05	0.00103623	A3SS	Pre vs In
MAPK10	8:132746838-132746879	-0.253412	9.58786e-05	0.00404142	IR	Pre vs In
MAPK10	8:132746838-132746879	-0.49063	6.70547e-09	1.01803e-06	IR	Pre vs Post
MAPK12	5:429912-429971	0.0548159	0.0020112	0.0416446	A5SS	Pre vs In
MAPRE2	6:118878937-118879240	-0.119013	5.11399e-05	0.002399	AltStart	Pre vs In
MAPT	12:17127330-17127527	0.0482692	0.000846761	0.0326398	Cassette	In vs Post
MARCH1	8:52410601-52410637	0.0816886	0.00118803	0.0408655	Cassette	In vs Post
[truncated: 1,392 more rows]

## Sheet: Table S4
Table S4. The DSGs of staged differentially AS in pituitary
DSGs	Location	delta_PSI	P-Value	FDR	DEAS events	Group
ABHD6	13:40009838-40009843	-0.329124	3.30162e-10	6.8991e-08	A5SS	Pre vs In
ABHD6	13:40009838-40009843	0.182692	0.0014414	0.0283327	A5SS	In vs Post
ABHD6	13:40009838-40009843	-0.146432	0.00183198	0.0290039	A5SS	Pre vs Post
ABLIM1	14:124869330-124869398	0.0851064	1.26903e-05	0.000758249	Cassette	Pre vs In
ABLIM1	14:124851129-124851317	0.0741988	0.000634784	0.0168692	AltStart	In vs Post
ABLIM1	14:124798005-124798082	-0.039801	0.000355468	0.00969437	Cassette_multi	Pre vs Post
ABLIM1	14:124851129-124851317	0.0655661	0.00241357	0.034542	AltStart	Pre vs Post
ABLIM2	8:2988578-2988658	0.371126	2.06563e-06	0.000177329	AltStart	Pre vs In
ABLIM2	8:3003657-3003713	0.191029	1.55e-05	0.000894687	Cassette	Pre vs In
ABLIM2	8:3012868-3012900	-0.06	0.0006627	0.0152259	Cassette	Pre vs In
ABLIM2	8:3026789-3026908	-0.381818	3.06828e-06	0.000277508	Cassette	In vs Post
ABLIM2	8:3003657-3003713	-0.165901	0.00040927	0.0121196	Cassette	In vs Post
ABLIM2	8:3012868-3012900	0.0526316	0.00175012	0.0321591	Cassette	In vs Post
ABLIM2	8:2988578-2988658	-0.246001	0.00333154	0.0484408	AltStart	In vs Post
ABLIM2	8:3026789-3026908	-0.281818	0.000826808	0.0171589	Cassette	Pre vs Post
ACTB	3:4076083-4076163	0.565611	2.28454e-39	3.6807e-36	AltEnd	Pre vs In
ACTB	3:4087346-4087494	-0.0837817	1.97751e-12	6.34592e-10	IR	Pre vs In
ACTB	3:4063134-4063214	0.0729167	0.00135991	0.0252987	AltEnd	Pre vs In
ACTB	3:4077036-4077057	-1	5.43169e-37	1.61025e-33	Cassette	In vs Post
ACTB	3:4087349-4087492	-0.0525473	5.8162e-07	6.74705e-05	IR	In vs Post
ACTB	3:4072643-4076156	-0.956631	1.96101e-06	0.000193069	AltEnd	In vs Post
ACTB	3:4087349-4087357	-0.363855	0.00266649	0.0421896	A3SS	In vs Post
ACTB	3:4077036-4077057	-1	8.98758e-63	2.4066e-59	Cassette	Pre vs Post
ACTB	3:4076156-4076163	0.978022	5.70927e-62	1.38979e-58	A3SS	Pre vs Post
ACTB	3:4087346-4087494	-0.0837817	1.06907e-12	3.27152e-10	IR	Pre vs Post
ACTB	3:4072643-4076156	-0.988889	3.26463e-12	9.01207e-10	AltEnd	Pre vs Post
ADD1	8:1707270-1707303	0.249673	7.39714e-05	0.00309143	Cassette	Pre vs In
ADD1	8:1678987-1679067	0.0217391	0.000835673	0.0180762	AltStart	Pre vs In
ADD1	8:1707270-1707303	-0.203209	0.00122756	0.0255879	Cassette	In vs Post
ADD1	8:1678987-1679067	0.0217391	0.00362685	0.0451283	AltStart	Pre vs Post
AHNAK	2:9201177-9201257	-0.182094	2.40884e-25	2.31903e-22	AltStart	Pre vs In
AHNAK	2:9210985-9211370	-0.445474	1.70598e-21	1.24287e-18	IR	Pre vs In
AHNAK	2:9207067-9207100	-1	5.30137e-18	3.24781e-15	MXE	Pre vs In
AHNAK	2:9207031-9207066	-0.327415	1.31278e-12	4.36879e-10	MXE	Pre vs In
AHNAK	2:9210978-9211074	-0.441097	2.65282e-11	7.01074e-09	A5SS	Pre vs In
AHNAK	2:9200497-9200659	-0.204499	5.98879e-11	1.44137e-08	A5SS	Pre vs In
AHNAK	2:9212227-9212242	-0.842105	3.34942e-09	5.82497e-07	A3SS	Pre vs In
AHNAK	2:9201266-9201391	-0.161771	1.76704e-08	2.63163e-06	Cassette	Pre vs In
AHNAK	2:9205880-9206121	0.581132	2.15858e-08	3.16232e-06	Cassette	Pre vs In
AHNAK	2:9205496-9205801	-0.262009	2.70279e-08	3.87533e-06	MXE	Pre vs In
AHNAK	2:9206904-9207030	0.276259	2.00846e-05	0.00109595	A5SS	Pre vs In
AHNAK	2:9204215-9205054	-0.435424	6.38814e-05	0.00279998	MXE	Pre vs In
AHNAK	2:9201266-9201391	0.292003	1.75838e-26	2.75973e-23	Cassette	In vs Post
AHNAK	2:9206803-9206904	0.756528	1.18014e-19	1.04958e-16	MXE	In vs Post
AHNAK	2:9207101-9207160	-0.551437	1.24671e-15	7.23119e-13	Cassette	In vs Post
AHNAK	2:9207031-9207066	0.3432	1.31918e-14	6.51797e-12	MXE	In vs Post
AHNAK	2:9201177-9201257	0.102546	1.43913e-14	6.98136e-12	AltStart	In vs Post
AHNAK	2:9209084-9209149	-0.256959	3.44572e-14	1.6129e-11	A3SS	In vs Post
AHNAK	2:9207067-9207100	1	2.94458e-13	1.13861e-10	MXE	In vs Post
AHNAK	2:9205370-9205432	-1	4.5838e-13	1.69862e-10	Cassette	In vs Post
AHNAK	2:9209586-9209682	0.203679	4.01392e-10	1.01033e-07	A5SS	In vs Post
AHNAK	2:9205802-9205817	1	2.24956e-09	4.6891e-07	A3SS	In vs Post
AHNAK	2:9205880-9205969	0.755102	2.46143e-08	4.15654e-06	Cassette	In vs Post
AHNAK	2:9206569-9206716	-0.759556	2.9709e-08	4.92339e-06	Cassette	In vs Post
AHNAK	2:9202566-9202687	-0.478588	6.37059e-08	9.71279e-06	Cassette	In vs Post
AHNAK	2:9210985-9211370	0.23449	6.84662e-08	1.03019e-05	IR	In vs Post
AHNAK	2:9205496-9205801	-1	6.87282e-08	1.03019e-05	MXE	In vs Post
AHNAK	2:9200881-9200929	0.210101	7.10385e-07	7.99738e-05	A5SS	In vs Post
AHNAK	2:9204263-9205054	1	5.46835e-06	0.000463178	MXE	In vs Post
AHNAK	2:9208187-9208386	0.105189	0.00074947	0.0187234	Cassette	In vs Post
AHNAK	2:9206311-9206353	-1	1.03188e-22	7.67519e-20	A5SS	Pre vs Post
AHNAK	2:9209149-9209250	0.543482	1.21008e-22	8.75741e-20	Cassette	Pre vs Post
AHNAK	2:9201266-9201391	0.232794	2.74713e-15	1.05085e-12	Cassette	Pre vs Post
AHNAK	2:9206830-9206856	-0.502976	5.40037e-15	1.9809e-12	A5SS	Pre vs Post
AHNAK	2:9200497-9200881	-0.733333	4.91329e-12	1.30261e-09	A5SS	Pre vs Post
AHNAK	2:9205802-9205879	-0.355932	2.3004e-11	5.54936e-09	MXE	Pre vs Post
AHNAK	2:9205496-9205586	-0.43701	8.77208e-10	1.67779e-07	MXE	Pre vs Post
AHNAK	2:9209586-9209682	0.223825	3.31976e-09	5.69829e-07	A5SS	Pre vs Post
AHNAK	2:9200882-9201244	0.0506228	6.32101e-06	0.000426342	Cassette	Pre vs Post
AHNAK	2:9210985-9211370	-0.210984	8.65739e-05	0.0033597	IR	Pre vs Post
AHNAK	2:9206392-9206472	0.0269436	0.000143339	0.00494383	AltStart	Pre vs Post
AHNAK	2:9207067-9207101	-0.192274	0.000203424	0.00649237	A3SS	Pre vs Post
AHNAK	2:9209586-9209971	0.235541	0.000233097	0.00715396	IR	Pre vs Post
AHNAK	2:9205969-9206184	-0.318436	0.000283764	0.00817906	A5SS	Pre vs Post
AHNAK	2:9205370-9205495	-0.220779	0.000386113	0.0102265	Cassette	Pre vs Post
AHNAK	2:9207031-9207066	-0.213678	0.00110486	0.0210268	MXE	Pre vs Post
ALDH7A1	2:129711966-129712023	0.662281	1.54811e-08	2.35768e-06	Cassette	Pre vs In
ALDH7A1	2:129709469-129709697	-0.221318	1.27144e-05	0.000758249	AltStart	Pre vs In
ALDH7A1	2:129709469-129709697	0.129289	0.00255437	0.0410808	AltStart	In vs Post
ALDH7A1	2:129711966-129712023	0.340852	2.24573e-06	0.000180583	Cassette	Pre vs Post
ANK2	8:109376393-109376404	-0.0887097	2.86296e-10	6.12491e-08	Cassette	Pre vs In
ANK2	8:109376393-109376404	0.0622547	0.000370555	0.0112092	Cassette	In vs Post
ANK2	8:109376393-109376473	-0.026455	0.00402466	0.048786	AltStart	Pre vs Post
ANKRD28	13:2960603-2960666	-0.0377358	0.0021083	0.0345269	Cassette	Pre vs In
ANKRD28	13:2988661-2988731	-0.0394737	0.000437875	0.0127265	Cassette	In vs Post
ANKRD28	13:3057376-3058350	-0.0244048	0.0033574	0.0487106	AltStart	In vs Post
ANKRD28	13:2960603-2960666	-0.0377358	0.000461293	0.0117194	Cassette	Pre vs Post
AP1G1	6:14757859-14757867	0.148319	0.000515328	0.0127911	Cassette	Pre vs In
AP1G1	6:14735663-14735743	0.0539216	1.27572e-05	0.000888707	AltEnd	In vs Post
AP1G1	6:14757859-14757867	0.141786	0.00164315	0.0272775	Cassette	Pre vs Post
AP2M1	13:122099892-122099897	0.158095	1.51587e-26	1.63447e-23	Cassette	Pre vs In
AP2M1	13:122100093-122100099	0.224702	9.06121e-23	7.18394e-20	A3SS	Pre vs In
AP2M1	13:122099892-122099897	-0.334694	3.16282e-60	1.40645e-56	Cassette	In vs Post
AP2M1	13:122100093-122100099	0.239919	4.7857e-30	4.41885e-27	A3SS	Pre vs Post
AP2M1	13:122099892-122099897	-0.176599	4.66448e-11	1.11519e-08	Cassette	Pre vs Post
APBB1	9:3316322-3316361	-0.155172	6.3434e-09	1.04264e-06	Cassette	Pre vs In
APBB1	9:3319038-3319043	-0.13102	3.77096e-05	0.0018489	Cassette	Pre vs In
APBB1	9:3315156-3315236	0.0604027	0.000850736	0.0183459	AltStart	Pre vs In
APBB1	9:3319038-3319043	0.120379	0.000338662	0.0105436	Cassette	In vs Post
APBB1	9:3316281-3316361	-0.0892019	1.3558e-11	3.37324e-09	AltStart	Pre vs Post
APBB1	9:3315156-3315236	0.0604027	0.000355524	0.00969437	AltStart	Pre vs Post
APBB1	9:3315515-3315624	0.642857	0.00120835	0.0222838	A3SS	Pre vs Post
APLP2	9:56846632-56846647	-0.372294	6.10706e-26	6.33161e-23	A3SS	Pre vs In
APLP2	9:56846606-56846622	0.372294	2.76318e-20	1.90986e-17	A5SS	Pre vs In
APLP2	9:56846622-56846647	0.0807336	0.000453798	0.0116279	IR	Pre vs In
APLP2	9:56846622-56846647	-0.15991	6.65848e-20	6.12603e-17	IR	In vs Post
APLP2	9:56846632-56846647	0.372294	3.16327e-16	1.96277e-13	A3SS	In vs Post
APLP2	9:56846606-56846622	-0.372294	5.13467e-13	1.87669e-10	A5SS	In vs Post
APLP2	9:56846622-56846647	-0.0791767	8.42908e-09	1.37625e-06	IR	Pre vs Post
ARHGEF10L	6:76159461-76160548	-0.22093	1.64056e-17	9.61366e-15	A3SS	Pre vs In
ARHGEF10L	6:76083872-76083988	0.239714	4.66839e-05	0.00219618	Cassette	Pre vs In
ARHGEF10L	6:76170383-76170397	0.125	0.00019455	0.00632201	Cassette	Pre vs In
ARHGEF10L	6:76170383-76170397	-0.26	1.70117e-09	3.75115e-07	Cassette	In vs Post
ARHGEF10L	6:76159461-76160548	-0.176471	1.26813e-23	9.9873e-21	A3SS	Pre vs Post
ARHGEF10L	6:76155274-76155713	0.0346154	2.86034e-05	0.00144926	AltStart	Pre vs Post
ASPH	4:71965585-71965677	0.5	0.000193841	0.00632201	MXE	Pre vs In
ASPH	4:71985957-71986106	-0.0265183	0.0035475	0.0483221	Cassette	Pre vs In
ASPH	4:71937473-71937517	-0.11914	0.000112199	0.00453485	Cassette	In vs Post
ASPH	4:71937473-71937517	-0.0942535	0.00181612	0.0288857	Cassette	Pre vs Post
ATM	9:36707534-36707622	0.0661763	6.41276e-05	0.00280621	Cassette	Pre vs In
ATM	9:36707534-36707622	-0.0745576	1.00601e-07	1.44308e-05	Cassette	In vs Post
ATM	9:36670046-36670104	0.0496943	0.000115817	0.00462709	Cassette	In vs Post
ATM	9:36623825-36623920	-0.132222	6.69348e-05	0.00274895	Cassette	Pre vs Post
ATXN1	7:12720591-12720671	0.174653	0.000243823	0.00752862	AltStart	Pre vs In
ATXN1	7:12720591-12720671	-0.249351	1.70143e-06	0.000172608	AltStart	In vs Post
ATXN1	7:12556741-12556821	-0.097561	0.000495729	0.0123251	AltStart	Pre vs Post
BAIAP3	3:40514359-40514387	-0.0996985	1.11472e-07	1.34746e-05	A5SS	Pre vs In
BAIAP3	3:40536759-40536794	0.0996896	6.62984e-05	0.00285485	A3SS	Pre vs In
BAIAP3	3:40514359-40514387	0.0713602	5.33028e-05	0.00268334	A5SS	In vs Post
BAIAP3	3:40564260-40564399	-0.057864	0.00112398	0.0241262	Cassette	In vs Post
BAIAP3	3:40546808-40546866	0.0217454	0.00147869	0.0287595	Cassette	In vs Post
BAIAP3	3:40536759-40536794	0.0966081	0.00135678	0.0242926	A3SS	Pre vs Post
BAIAP3	3:40545813-40545902	0.026224	0.00228246	0.0333975	A5SS	Pre vs Post
BAZ2B	15:66327169-66327175	0.173568	8.57591e-09	1.38427e-06	A5SS	Pre vs In
BAZ2B	15:66619665-66619767	-0.0654206	0.00145196	0.0265709	Cassette	Pre vs In
BAZ2B	15:66327169-66327201	-0.0499434	1.1991e-07	1.65768e-05	Cassette	In vs Post
BAZ2B	15:66694958-66695006	0.0883978	1.30046e-08	1.98985e-06	Cassette_multi	Pre vs Post
BAZ2B	15:66327169-66327175	0.0997195	0.000679419	0.015161	A5SS	Pre vs Post
BAZ2B	15:66408279-66408349	0.0386055	0.000966994	0.0192082	Cassette	Pre vs Post
BBS4	7:60680513-60680593	0.0372382	0.000122861	0.00449368	AltStart	Pre vs In
BBS4	7:60664029-60664085	-0.0615171	0.00037288	0.0112416	Cassette	In vs Post
BBS4	7:60664029-60664085	-0.217391	5.2598e-05	0.00229758	MXE	Pre vs Post
BIRC3	9:33041592-33041744	0.146154	0.0010538	0.02131	AltStart	Pre vs In
BIRC3	9:33041592-33041744	-0.146154	0.000211683	0.0075811	AltStart	In vs Post
BIRC3	9:33043570-33044748	0.00507975	0.00242913	0.0346906	IR	Pre vs Post
BIRC3	9:33042242-33042423	0.147619	0.00341191	0.04355	Cassette	Pre vs Post
BPTF	12:14163677-14163865	0.126226	0.000400236	0.0106503	Cassette	Pre vs In
BPTF	12:14235627-14235707	-0.360784	2.58892e-05	0.00154877	AltStart	In vs Post
BPTF	12:14235627-14235707	-0.351613	5.39176e-05	0.00233589	AltStart	Pre vs Post
BPTF	12:14113161-14113275	0.454545	0.00341321	0.04355	IR	Pre vs Post
BRAF	18:9059232-9059351	0.0362694	0.000634809	0.0147771	Cassette	Pre vs In
BRAF	18:8958307-8958714	0.0449735	0.0034537	0.0476246	A5SS	Pre vs In
BRAF	18:9059232-9059351	-0.0362694	0.000581115	0.0157568	Cassette	In vs Post
BRAF	18:9073989-9074024	-0.0376568	0.00198838	0.0307406	Cassette	Pre vs Post
BRD8	2:140188127-140188173	-0.0478261	4.19673e-06	0.000310789	Cassette_multi	Pre vs In
BRD8	2:140187593-140187651	0.113008	7.659e-05	0.00347534	Cassette	In vs Post
BRD8	2:140184209-140184253	0.0271186	0.000143457	0.00494383	Cassette	Pre vs Post
BRD8	2:140187593-140187651	0.101587	0.000253215	0.0075505	Cassette	Pre vs Post
C14orf39	1:189429090-189429175	0.0827586	7.18439e-10	1.40335e-07	Cassette_multi	Pre vs In
C14orf39	1:189442759-189442804	-0.732143	0.000479895	0.0121465	Cassette	Pre vs In
C14orf39	1:189429090-189429175	-0.0620486	1.3623e-05	0.000929601	Cassette_multi	In vs Post
C14orf39	1:189470342-189470413	0.375	0.0001048	0.0043018	MXE	In vs Post
C14orf39	1:189407368-189407400	0.329091	0.000538477	0.0148882	Cassette	In vs Post
C14orf39	1:189471605-189471685	-0.47619	0.000903311	0.0210514	AltStart	In vs Post
C14orf39	1:189463391-189463479	-0.187028	0.00222306	0.0377552	A5SS	In vs Post
C14orf39	1:189470342-189470413	1	2.34823e-08	3.41731e-06	MXE	Pre vs Post
C14orf39	1:189407368-189407400	0.409091	1.68454e-06	0.00014224	Cassette	Pre vs Post
C14orf39	1:189463391-189463478	-0.259259	8.05875e-05	0.00318273	A5SS	Pre vs Post
CACNA1C	5:69385297-69385356	-0.424569	1.26684e-05	0.000758249	Cassette	Pre vs In
CACNA1C	5:69385118-69385177	0.466667	1.284e-05	0.000764052	MXE	Pre vs In
CACNA1C	5:69385118-69385177	-0.709091	1.81038e-09	3.92704e-07	MXE	In vs Post
CACNA1C	5:69406215-69406298	-0.345238	0.00334409	0.0430089	MXE	Pre vs Post
CACNA1D	13:35862239-35862322	0.447059	0.000131202	0.00473453	MXE	Pre vs In
CACNA1D	13:35815014-35815073	-0.183729	0.00242005	0.0398822	Cassette	In vs Post
CACNA1D	13:35899743-35899769	-0.114478	0.00111189	0.0210709	Cassette	Pre vs Post
CACNA2D1	9:98193232-98193249	-0.5	0.00321678	0.0453511	Cassette	Pre vs In
CACNA2D1	9:97861990-97862029	-0.0714286	1.07328e-05	0.000769793	Cassette	In vs Post
CACNA2D1	9:98205947-98205967	0.0997064	0.000636331	0.0168935	Cassette	In vs Post
CACNA2D1	9:98217922-98217958	0.051601	0.000852996	0.0201405	Cassette	In vs Post
CACNA2D1	9:98242342-98242422	-0.0276498	0.000916888	0.0212515	AltEnd	In vs Post
CACNA2D1	9:98205947-98205967	0.122494	1.96187e-05	0.00105907	Cassette	Pre vs Post
CACNA2D1	9:97861990-97862029	-0.0714286	2.78727e-05	0.00141891	Cassette	Pre vs Post
CALU	18:19856996-19857189	0.0299625	0.00174423	0.0304867	Cassette	Pre vs In
CALU	18:19856996-19857189	-0.0299625	0.0014043	0.0279405	Cassette	In vs Post
CALU	18:19844581-19844661	-0.0192719	0.00183705	0.0290039	AltEnd	Pre vs Post
CAMK2B	18:50952438-50952518	-0.245283	1.82884e-06	0.000162165	AltStart	Pre vs In
CAMK2B	18:50945772-50945816	-0.21449	0.000148415	0.00519051	Cassette	Pre vs In
CAMK2B	18:50950611-50950691	-0.202778	0.000497462	0.012491	AltStart	Pre vs In
CAMK2B	18:50952438-50952518	-0.48199	9.17348e-11	2.6038e-08	AltStart	In vs Post
CAMK2B	18:50945772-50945816	0.194406	0.0011302	0.0241838	Cassette	In vs Post
CAMK2B	18:50952438-50952518	-0.727273	2.53151e-24	2.18665e-21	AltStart	Pre vs Post
CAPS2	5:38598274-38598330	0.104704	0.00343086	0.0475069	Cassette	Pre vs In
CAPS2	5:38610375-38610386	-0.0998386	0.000389509	0.0116508	A5SS	In vs Post
CAPS2	5:38598274-38598330	0.123463	3.2111e-05	0.00157768	Cassette	Pre vs Post
CCDC15	9:52169915-52170034	-0.436028	4.60768e-07	4.79555e-05	Cassette	Pre vs In
CCDC15	9:52165573-52165695	-0.2	2.18059e-05	0.00134989	Cassette	In vs Post
CCDC15	9:52169915-52170034	0.32856	0.000219989	0.00778452	Cassette	In vs Post
CCDC15	9:52165573-52165695	-0.172973	0.00275442	0.0378118	Cassette	Pre vs Post
CCDC191	13:145889473-145889605	-0.539469	1.05991e-10	2.44197e-08	Cassette	Pre vs In
CCDC191	13:145889473-145889605	0.32236	2.87958e-05	0.00169978	Cassette	In vs Post
CCDC191	13:145889473-145889605	-0.217108	0.00155914	0.0265561	Cassette	Pre vs Post
CCND2	5:66114140-66114616	-0.0544166	0.000122398	0.00448284	AltStart	Pre vs In
CCND2	5:66087745-66090656	-0.4258	0.00207436	0.0361031	IR	In vs Post
CCND2	5:66087749-66090670	-0.267606	3.99488e-05	0.00187668	IR	Pre vs Post
CCSER2	14:85610130-85610210	0.148005	5.62115e-12	1.6836e-09	AltStart	Pre vs In
CCSER2	14:85610310-85610390	-0.0366252	0.00204399	0.0338064	AltStart	Pre vs In
CCSER2	14:85616543-85616623	-0.05	9.88581e-05	0.00413987	AltStart	In vs Post
CCSER2	14:85610310-85610390	0.0421687	0.000710228	0.0180472	AltStart	In vs Post
CCSER2	14:85610130-85610210	0.135268	2.15942e-09	3.90695e-07	AltStart	Pre vs Post
CCSER2	14:85616543-85616623	-0.05	4.84371e-05	0.00216875	AltStart	Pre vs Post
CD99L2	X:122460831-122460848	-0.242308	7.02386e-05	0.00297697	Cassette	Pre vs In
CD99L2	X:122460831-122460848	0.55	7.81829e-15	4.01153e-12	Cassette	In vs Post
CD99L2	X:122460831-122460848	0.307692	2.61769e-07	2.86098e-05	Cassette	Pre vs Post
CEP350	9:121608430-121608476	-0.0521739	5.00289e-08	6.7429e-06	Cassette	Pre vs In
CEP350	9:121622843-121622956	-0.0650912	1.58229e-05	0.00090943	Cassette	Pre vs In
CEP350	9:121610290-121610724	0.0942029	0.00127327	0.0242405	A3SS	Pre vs In
CEP350	9:121622843-121622956	0.0850979	1.88597e-07	2.4788e-05	Cassette	In vs Post
CEP350	9:121713003-121713009	-0.0340136	0.00261747	0.0416935	A3SS	In vs Post
CEP350	9:121610290-121610370	0.0659543	0.00150489	0.0259141	AltEnd	Pre vs Post
CEP95	12:14559355-14559435	0.129032	1.19172e-06	0.000111931	AltEnd	Pre vs In
CEP95	12:14569128-14569651	-0.139535	0.00230852	0.0386036	A5SS	In vs Post
CEP95	12:14526551-14526631	-0.107143	0.00247824	0.0405456	AltEnd	In vs Post
CEP95	12:14559355-14559435	0.100461	0.00170634	0.0279112	AltEnd	Pre vs Post
CFLAR	15:104781836-104782006	0.0929287	0.00177137	0.030628	Cassette	Pre vs In
CFLAR	15:104781836-104782006	0.155422	7.36014e-06	0.000577576	Cassette	In vs Post
CFLAR	15:104781836-104782006	0.248351	7.23184e-12	1.86199e-09	Cassette	Pre vs Post
CGA	1:55547743-55547823	-0.394541	1.37171e-29	1.76075e-26	AltEnd	Pre vs In
CGA	1:55552945-55553025	-0.403937	3.54365e-16	1.83697e-13	AltEnd	Pre vs In
CGA	1:55552943-55552970	1.47047e-06	6.2421e-10	1.22819e-07	IR	Pre vs In
CGA	1:55566205-55566210	-0.419328	6.07487e-05	0.00269776	A3SS	Pre vs In
CGA	1:55552945-55553025	0.433816	2.85597e-19	2.38126e-16	AltEnd	In vs Post
CGA	1:55565765-55565833	0.989321	5.5038e-10	1.33497e-07	A5SS	In vs Post
CGA	1:55547743-55547823	0.17295	8.58787e-09	1.61361e-06	AltEnd	In vs Post
CGA	1:55568443-55568498	-0.388889	1.29218e-08	2.34534e-06	MXE	In vs Post
CGA	1:55566205-55566210	0.399107	9.70678e-05	0.00408782	A3SS	In vs Post
CGA	1:55553616-55553644	3.50215e-05	0.00124948	0.025883	IR	In vs Post
CGA	1:55547817-55547823	-0.178082	3.34529e-18	1.72263e-15	A3SS	Pre vs Post
CGA	1:55568443-55568498	-0.25	1.07284e-05	0.00065738	MXE	Pre vs Post
CGA	1:55553586-55553666	0.454545	0.000247064	0.00744165	AltEnd	Pre vs Post
CGA	1:55566205-55566210	-0.0202206	0.000330387	0.00918668	A3SS	Pre vs Post
CHD8	7:77778925-77779064	-0.220245	0.000567001	0.0135858	Cassette	Pre vs In
CHD8	7:77734679-77734769	-0.306188	4.65913e-09	9.07373e-07	AltStart	In vs Post
CHD8	7:77734679-77734769	-0.341667	5.62056e-10	1.12315e-07	AltStart	Pre vs Post
CHGB	17:14758987-14759069	-0.000170653	4.58322e-20	3.0133e-17	IR	Pre vs In
CHGB	17:14758491-14758525	-0.000403473	2.33175e-08	3.39754e-06	IR	Pre vs In
CHGB	17:14758940-14758987	0.666667	0.0010195	0.0208194	Cassette	Pre vs In
CHGB	17:14758491-14758525	0.000520292	2.04753e-19	1.76226e-16	IR	In vs Post
CHGB	17:14758987-14759069	-0.000170653	3.11669e-61	6.95463e-58	IR	Pre vs Post
CHGB	17:14758491-14758525	0.00011682	2.14314e-45	3.58669e-42	IR	Pre vs Post
CHGB	17:14757985-14758012	-0.0882353	0.00013544	0.00471869	A3SS	Pre vs Post
CLASP2	13:19357987-19357989	0.290331	3.60753e-10	7.42326e-08	Cassette	Pre vs In
CLASP2	13:19387748-19387771	-0.5	0.00237629	0.0372849	MXE	Pre vs In
CLASP2	13:19380441-19380467	0.172917	0.0028662	0.044358	Cassette	In vs Post
CLASP2	13:19357987-19357989	0.298485	2.76545e-12	7.79479e-10	Cassette	Pre vs Post
CLASP2	13:19387748-19387771	-0.5	0.000235506	0.00720701	MXE	Pre vs Post
CLOCK	8:54809140-54809229	0.111935	4.59023e-05	0.00217078	Cassette	Pre vs In
CLOCK	8:54837139-54837219	-0.0673077	0.000939835	0.0197386	AltEnd	Pre vs In
CLOCK	8:54837139-54837219	0.060505	0.00065093	0.0171457	AltEnd	In vs Post
CLOCK	8:54809140-54809229	0.0946265	0.000135514	0.00471869	Cassette	Pre vs Post
CLTC	12:35860167-35860247	0.0257511	0.000836214	0.0180762	AltStart	Pre vs In
CLTC	12:35911681-35911701	0.0289069	0.000829518	0.0198897	Cassette	In vs Post
CLTC	12:35911681-35911701	0.0402074	3.8933e-05	0.00183864	Cassette	Pre vs Post
CNKSR2	X:17711266-17711412	0.144578	8.951e-05	0.003564	Cassette	Pre vs In
CNKSR2	X:17745302-17745391	-0.181835	0.00134617	0.0251678	Cassette_multi	Pre vs In
CNKSR2	X:17711266-17711412	-0.144578	9.28347e-05	0.00398219	Cassette	In vs Post
CNKSR2	X:17745302-17745391	-0.177426	0.00408647	0.049273	Cassette_multi	Pre vs Post
COL11A1	4:115637939-115638019	-0.274194	0.00296692	0.0431343	AltStart	Pre vs In
COL11A1	4:115638898-115638960	0.589744	0.000224801	0.00786095	Cassette	In vs Post
COL11A1	4:115637939-115638019	-0.348485	5.18263e-05	0.00228249	AltStart	Pre vs Post
COL11A1	4:115638098-115638157	0.262121	0.000218934	0.00689693	AltStart	Pre vs Post
COL27A1	1:254845751-254845759	-0.328804	0.00322445	0.0454249	A5SS	Pre vs In
COL27A1	1:254825428-254825436	0.340909	0.00324702	0.0477523	A5SS	In vs Post
COL27A1	1:254825428-254825436	0.350909	0.00215238	0.0322352	A5SS	Pre vs Post
COPG2	18:18277817-18277897	0.0460705	1.4196e-07	1.67837e-05	AltStart	Pre vs In
COPG2	18:18311657-18311910	0.634615	6.62251e-05	0.00285485	MXE	Pre vs In
COPG2	18:18307238-18307251	-0.0897919	7.48724e-05	0.0031098	A5SS	Pre vs In
COPG2	18:18302210-18302290	0.0156087	8.06509e-05	0.003289	AltStart	Pre vs In
COPG2	18:18306971-18307051	-0.0886216	0.000152195	0.00528	AltStart	Pre vs In
COPG2	18:18299019-18299099	-0.0919613	0.000180411	0.00596705	AltEnd	Pre vs In
COPG2	18:18315943-18324603	-1	0.000451811	0.0115919	A3SS	Pre vs In
COPG2	18:18303613-18303693	-0.0441989	1.07685e-05	0.000770279	AltStart	In vs Post
COPG2	18:18312132-18312170	0.417219	1.31356e-05	0.000907953	A3SS	In vs Post
COPG2	18:18311457-18311472	0.165887	4.05868e-05	0.00218767	A3SS	In vs Post
COPG2	18:18258088-18258168	0.0234899	0.000698918	0.0178962	AltEnd	In vs Post
COPG2	18:18295009-18296349	0.289474	0.00132738	0.0270144	A5SS	In vs Post
COPG2	18:18315943-18316195	0.530091	0.00136111	0.0273922	A3SS	In vs Post
COPG2	18:18312607-18314291	0.0448527	0.00222162	0.0377549	AltEnd	In vs Post
COPG2	18:18277817-18277897	0.0460705	2.48286e-07	2.76829e-05	AltStart	Pre vs Post
COPG2	18:18295009-18299019	0.143242	6.32182e-05	0.00262449	IR	Pre vs Post
COPG2	18:18295009-18299019	0.143242	6.44276e-05	0.00265937	IR	Pre vs Post
COPG2	18:18311457-18311472	0.155142	0.000337908	0.00933368	A3SS	Pre vs Post
COPG2	18:18302210-18302290	0.0162866	0.00369376	0.0456638	AltStart	Pre vs Post
CPED1	18:25903537-25903617	-0.207742	2.17454e-05	0.00116368	AltStart	Pre vs In
CPED1	18:25924654-25924734	0.165952	0.000491983	0.0138988	AltStart	In vs Post
CPED1	18:25903537-25903617	-0.131007	0.00163382	0.0271732	AltStart	Pre vs Post
CPT1C	6:54733574-54733627	-0.224631	0.0036922	0.0497634	AltStart	Pre vs In
CPT1C	6:54733574-54733627	0.310345	3.74528e-08	6.09316e-06	AltStart	In vs Post
CPT1C	6:54733131-54733211	-0.449412	0.00138695	0.0276996	AltStart	In vs Post
CPT1C	6:54733574-54733627	0.0857143	0.00226022	0.0332038	AltStart	Pre vs Post
CTDSPL2	1:127044707-127044764	-0.575439	1.76067e-05	0.000994984	Cassette	Pre vs In
CTDSPL2	1:127044707-127044764	0.65	1.56894e-05	0.0010571	Cassette	In vs Post
CTDSPL2	1:127084089-127084169	0.0746269	0.00307762	0.0406558	AltEnd	Pre vs Post
CYP20A1	15:106582380-106582466	0.114455	1.86999e-05	0.00103719	Cassette	Pre vs In
CYP20A1	15:106582380-106582466	-0.0996916	0.000652731	0.0171457	Cassette	In vs Post
CYP20A1	15:106589118-106589201	0.0465116	0.00240792	0.0397738	A5SS	In vs Post
CYP20A1	15:106532088-106532168	-0.0408163	0.00246469	0.0350488	AltStart	Pre vs Post
CYP20A1	15:106589118-106589201	0.0465116	0.00309805	0.0408251	A5SS	Pre vs Post
DCDC1	2:29384221-29384378	0.339754	1.32305e-15	6.14899e-13	Cassette	Pre vs In
DCDC1	2:29499821-29499901	0.0926843	0.000274087	0.00818191	AltEnd	Pre vs In
DCDC1	2:29420678-29420883	-0.11786	0.000300251	0.00866548	Cassette	Pre vs In
DCDC1	2:29792770-29792981	0.233918	0.00216155	0.0350697	AltEnd	Pre vs In
DCDC1	2:29384221-29384378	-0.248614	1.83769e-08	3.18386e-06	Cassette	In vs Post
DCDC1	2:29458644-29458724	-0.124245	0.000541142	0.0149309	AltStart	In vs Post
DCDC1	2:29458644-29458724	-0.148936	1.61296e-05	0.000907358	AltStart	Pre vs Post
DCDC1	2:29499821-29499901	0.0965791	0.000352658	0.00965554	AltEnd	Pre vs Post
DCDC1	2:29710388-29710468	-0.187607	0.000568071	0.0134971	AltEnd	Pre vs Post
DCDC1	2:29420678-29420883	-0.101865	0.00186305	0.0292976	Cassette	Pre vs Post
DDR1	7:23376086-23376228	0.190167	2.25084e-06	0.000190323	Cassette	Pre vs In
DDR1	7:23377199-23377369	-0.122505	0.000516191	0.0128008	Cassette_multi	Pre vs In
DDR1	7:23387031-23387141	0.114704	6.42518e-05	0.0030558	Cassette	In vs Post
DDR1	7:23387031-23387141	0.0846104	0.00107272	0.0205319	Cassette	Pre vs Post
DDR1	7:23375711-23375972	0.264769	0.00395743	0.0481236	A5SS	Pre vs Post
DLG1	13:132945576-132945674	-0.145736	7.56318e-05	0.00313169	Cassette	Pre vs In
DLG1	13:133040553-133040652	0.113654	0.00022871	0.00716041	Cassette	Pre vs In
DLG1	13:133040553-133040652	-0.114295	0.000254082	0.00866902	Cassette	In vs Post
DLG1	13:132821431-132821436	-0.136364	0.00028176	0.00923543	Cassette	In vs Post
DLG1	13:132821431-132821436	-0.15368	1.85104e-06	0.000153498	Cassette	Pre vs Post
DMAC2	6:49410195-49410238	0.160278	0.00156719	0.0281821	AltStart	Pre vs In
DMAC2	6:49406041-49406203	0.0766255	0.00021439	0.00764724	Cassette	In vs Post
DMAC2	6:49406041-49406203	0.0629003	0.00320771	0.0418732	Cassette	Pre vs Post
DMXL1	2:123117898-123117948	0.100999	0.00100998	0.020672	Cassette	Pre vs In
DMXL1	2:123029509-123029589	0.0353518	0.00120141	0.0233491	AltEnd	Pre vs In
DMXL1	2:123102433-123102513	0.0555556	0.00304327	0.0460042	AltStart	In vs Post
DMXL1	2:123029509-123029589	0.0324478	0.00263287	0.0366808	AltEnd	Pre vs Post
DNAH7	15:99980879-99980941	-0.171972	2.55069e-05	0.00132735	Cassette	Pre vs In
DNAH7	15:99980879-99980941	0.369607	4.0561e-14	1.83425e-11	Cassette	In vs Post
DNAH7	15:99967161-99967223	0.0860215	0.000283443	0.00817861	Cassette_multi	Pre vs Post
DNAH7	15:99980879-99980941	0.197636	0.00103283	0.0200421	Cassette	Pre vs Post
DNAJC13	13:73655818-73655948	0.217853	0.000147544	0.00517191	Cassette	Pre vs In
DNAJC13	13:73643498-73643512	0.0649351	0.0018126	0.0329891	Cassette	In vs Post
DNAJC13	13:73638260-73638304	-0.162768	0.00265503	0.0369318	A3SS	Pre vs Post
DNAJC24	2:29281984-29282072	-0.116228	6.31103e-06	0.000439587	Cassette_multi	Pre vs In
DNAJC24	2:29283691-29283771	0.0273816	0.00233213	0.0368669	AltStart	Pre vs In
DNAJC24	2:29248988-29249100	-0.0781095	0.00284877	0.0419167	Cassette	Pre vs In
DNAJC24	2:29283691-29283771	-0.0288558	0.00117536	0.0248297	AltStart	In vs Post
DNAJC24	2:29281984-29282072	-0.107643	6.95995e-05	0.00281313	Cassette_multi	Pre vs Post
DOCK7	6:149945966-149945980	-0.398374	6.81008e-12	1.9739e-09	Cassette	Pre vs In
DOCK7	6:149953742-149953751	0.255489	9.10883e-06	0.000583224	A3SS	Pre vs In
DOCK7	6:149811347-149811360	0.075542	0.00135195	0.0272887	A3SS	In vs Post
DOCK7	6:149945966-149945980	-0.369549	1.52209e-10	3.36834e-08	Cassette	Pre vs Post
DOCK7	6:149953742-149953751	0.234358	5.79125e-05	0.00245632	A3SS	Pre vs Post
DPYSL3	2:148677197-148677277	-0.0756303	0.000466835	0.0119136	AltEnd	Pre vs In
DPYSL3	2:148776240-148776299	0.509615	2.82191e-06	0.000259536	AltStart	In vs Post
DPYSL3	2:148677197-148677277	0.0756303	0.00151621	0.029272	AltEnd	In vs Post
DPYSL3	2:148776240-148776299	0.394231	0.00156516	0.0265591	AltStart	Pre vs Post
DST	7:29151250-29151341	-0.128526	0.000175888	0.00586206	Cassette	Pre vs In
DST	7:28849536-28849616	-0.0375731	0.0036915	0.0497634	AltStart	Pre vs In
DST	7:29288805-29288822	-0.0291636	6.99552e-05	0.00325737	Cassette	In vs Post
DST	7:29294637-29294747	0.211223	5.89875e-07	5.80701e-05	Cassette	Pre vs Post
DST	7:29151279-29151341	-0.107692	8.45107e-05	0.00328748	Cassette	Pre vs Post
DST	7:28849536-28849616	-0.0501509	0.000273116	0.0079578	AltStart	Pre vs Post
EHBP1	3:79092572-79092676	0.288121	2.58557e-09	4.52575e-07	Cassette	Pre vs In
EHBP1	3:79092572-79092676	-0.272211	1.54178e-08	2.74242e-06	Cassette	In vs Post
EHBP1	3:79257408-79257461	0.118331	0.00222562	0.0328711	Cassette	Pre vs Post
EHBP1	3:78962925-78963032	-0.100495	0.00281526	0.0382467	Cassette	Pre vs Post
EHBP1	3:79003185-79003265	-0.038108	0.00341189	0.04355	AltEnd	Pre vs Post
ELMOD1	9:36191173-36191196	-0.0435185	1.4637e-06	0.000133748	Cassette	Pre vs In
ELMOD1	9:36176952-36176990	0.123089	0.00104409	0.0211482	A3SS	Pre vs In
ELMOD1	9:36191173-36191196	0.0436647	1.14005e-06	0.000120228	Cassette	In vs Post
ELMOD1	9:36176952-36176990	-0.116013	0.00259389	0.0415412	A3SS	In vs Post
ELMOD1	9:36164287-36164377	-0.0250068	0.00336402	0.0487536	Cassette_multi	In vs Post
ELMOD1	9:36164287-36164377	-0.0280752	0.000185707	0.0059984	Cassette_multi	Pre vs Post
ENOX2	X:107086957-107087088	0.238095	0.000575198	0.0137213	AltEnd	Pre vs In
ENOX2	X:107353458-107353479	0.25	0.00339814	0.048982	AltStart	In vs Post
ENOX2	X:107367197-107367208	0.318182	0.000886809	0.018107	A5SS	Pre vs Post
ENOX2	X:107353458-107353479	0.304348	0.00150256	0.0258906	AltStart	Pre vs Post
ENSSSCG00000001229	7:22825427-22825445	0.227744	1.45021e-86	4.88648e-83	A5SS	Pre vs In
ENSSSCG00000001229	7:22940124-22940165	-0.809891	2.69866e-59	6.0621e-56	MXE	Pre vs In
ENSSSCG00000001229	7:22975547-22975627	0.901408	1.11652e-45	2.14977e-42	AltEnd	Pre vs In
ENSSSCG00000001229	7:22869835-22869886	-0.398898	2.32126e-39	3.6807e-36	MXE	Pre vs In
ENSSSCG00000001229	7:22956159-22956239	0.331508	2.91217e-25	2.70691e-22	AltStart	Pre vs In
ENSSSCG00000001229	7:22956420-22956689	0.310395	1.62653e-23	1.37015e-20	Cassette	Pre vs In
ENSSSCG00000001229	7:22976228-22976308	1	1.65432e-15	7.55827e-13	AltEnd	Pre vs In
ENSSSCG00000001229	7:22957789-22958064	-1	5.23484e-14	2.07515e-11	MXE	Pre vs In
ENSSSCG00000001229	7:22957032-22957122	0.042506	2.04438e-11	5.56649e-09	A3SS	Pre vs In
ENSSSCG00000001229	7:22889898-22889916	-0.886053	1.1543e-10	2.63688e-08	A3SS	Pre vs In
ENSSSCG00000001229	7:22938701-22938970	0.0695915	2.06855e-09	3.74227e-07	Cassette	Pre vs In
ENSSSCG00000001229	7:22826215-22826272	0.122122	1.14189e-08	1.81063e-06	Cassette	Pre vs In
ENSSSCG00000001229	7:22938303-22938383	0.154448	1.92564e-07	2.1792e-05	AltStart	Pre vs In
ENSSSCG00000001229	7:22957601-22957674	0.239863	2.18282e-06	0.000185616	MXE	Pre vs In
ENSSSCG00000001229	7:22889305-22889574	-0.11232	0.000108848	0.00411515	MXE	Pre vs In
ENSSSCG00000001229	7:22974912-22974992	0.164957	0.000521379	0.0128631	AltEnd	Pre vs In
ENSSSCG00000001229	7:22890686-22890737	0.543266	2.40405e-84	2.13808e-80	MXE	In vs Post
ENSSSCG00000001229	7:22917973-22918132	-0.871884	2.32922e-74	1.55365e-70	MXE	In vs Post
ENSSSCG00000001229	7:22941002-22941034	-0.532291	1.06007e-32	2.35697e-29	MXE	In vs Post
ENSSSCG00000001229	7:22869835-22870110	0.385569	5.32587e-32	1.09307e-28	MXE	In vs Post
ENSSSCG00000001229	7:22940107-22940165	-0.294152	4.38555e-31	8.35792e-28	Cassette	In vs Post
ENSSSCG00000001229	7:22891080-22891190	-0.0689933	1.19811e-18	9.6869e-16	MXE	In vs Post
ENSSSCG00000001229	7:22827331-22827381	0.252775	1.82711e-18	1.39283e-15	Cassette	In vs Post
ENSSSCG00000001229	7:22956420-22956689	0.166466	2.35652e-18	1.74651e-15	Cassette	In vs Post
ENSSSCG00000001229	7:22958184-22958294	-0.971897	4.41545e-15	2.35617e-12	MXE	In vs Post
ENSSSCG00000001229	7:22889419-22889574	-0.271546	4.75135e-14	2.11285e-11	Cassette	In vs Post
ENSSSCG00000001229	7:22825347-22825427	-0.237474	1.622e-12	5.62034e-10	AltStart	In vs Post
ENSSSCG00000001229	7:22919170-22919250	-0.0533117	3.44228e-11	1.03195e-08	AltStart	In vs Post
ENSSSCG00000001229	7:22956916-22957191	-0.155049	1.26078e-08	2.30403e-06	Cassette	In vs Post
ENSSSCG00000001229	7:22939231-22939437	0.0589903	5.0517e-08	8.02288e-06	MXE	In vs Post
ENSSSCG00000001229	7:22958815-22958923	-0.109588	8.03725e-06	0.000617988	Cassette_multi	In vs Post
ENSSSCG00000001229	7:22959084-22962547	-0.0714648	3.04046e-05	0.0017521	AltEnd	In vs Post
ENSSSCG00000001229	7:22825525-22826440	-0.0674181	3.19045e-05	0.001812	AltStart	In vs Post
ENSSSCG00000001229	7:22974912-22974992	-0.0842363	6.09746e-05	0.00292601	AltEnd	In vs Post
ENSSSCG00000001229	7:22826215-22826272	-0.0722547	0.000228651	0.00796427	Cassette	In vs Post
ENSSSCG00000001229	7:22940460-22940570	-0.0963879	0.000665232	0.01735	MXE	In vs Post
ENSSSCG00000001229	7:22854728-22855074	-0.0721519	0.000798393	0.0194716	Cassette_multi	In vs Post
ENSSSCG00000001229	7:22957601-22957896	0.276316	0.00148942	0.0288803	A3SS	In vs Post
ENSSSCG00000001229	7:22889800-22890075	-0.0493747	0.00328827	0.0480472	MXE	In vs Post
ENSSSCG00000001229	7:22891788-22896292	-0.00901055	0.0033184	0.0483024	AltEnd	In vs Post
ENSSSCG00000001229	7:22940460-22940570	0.599834	3.60033e-82	1.92812e-78	MXE	Pre vs Post
ENSSSCG00000001229	7:22941002-22941034	0.632973	3.64309e-73	1.62585e-69	MXE	Pre vs Post
ENSSSCG00000001229	7:22825347-22825427	-0.401269	3.46931e-70	1.32711e-66	AltStart	Pre vs Post
ENSSSCG00000001229	7:22891788-22892135	0.657174	1.74063e-65	5.8261e-62	Cassette	Pre vs Post
ENSSSCG00000001229	7:22891080-22891190	-0.531861	1.68251e-64	5.00584e-61	MXE	Pre vs Post
ENSSSCG00000001229	7:22956420-22956689	0.671138	2.29503e-59	4.72724e-56	Cassette	Pre vs Post
ENSSSCG00000001229	7:22920060-22920196	-0.666512	2.91861e-57	5.58226e-54	Cassette	Pre vs Post
ENSSSCG00000001229	7:22940066-22940106	0.851852	1.10134e-43	1.73473e-40	MXE	Pre vs Post
ENSSSCG00000001229	7:22869887-22869934	0.440275	7.05278e-42	1.04918e-38	Cassette	Pre vs Post
ENSSSCG00000001229	7:22824947-22825103	-0.502325	1.93506e-41	2.72711e-38	A5SS	Pre vs Post
ENSSSCG00000001229	7:22870230-22870281	0.242536	8.00253e-35	8.92849e-32	A3SS	Pre vs Post
ENSSSCG00000001229	7:22827678-22827795	-0.973684	3.10672e-34	3.19956e-31	A5SS	Pre vs Post
ENSSSCG00000001229	7:22958184-22958294	-1	8.02014e-22	5.36889e-19	MXE	Pre vs Post
ENSSSCG00000001229	7:22939312-22939401	0.972222	3.58538e-21	2.23269e-18	MXE	Pre vs Post
ENSSSCG00000001229	7:22956159-22956239	0.253786	1.54772e-20	9.41894e-18	AltStart	Pre vs Post
ENSSSCG00000001229	7:22975547-22975627	0.167175	3.95445e-20	2.35307e-17	AltEnd	Pre vs Post
ENSSSCG00000001229	7:22957830-22957841	0.179292	2.1703e-19	1.21071e-16	A3SS	Pre vs Post
ENSSSCG00000001229	7:22956764-22957191	0.170674	2.53421e-17	1.25664e-14	MXE	Pre vs Post
ENSSSCG00000001229	7:22941513-22945277	0.0292484	2.83285e-17	1.37919e-14	AltEnd	Pre vs Post
ENSSSCG00000001229	7:22918787-22918846	-0.664211	7.39131e-16	2.95399e-13	A5SS	Pre vs Post
ENSSSCG00000001229	7:22890738-22890786	-0.341333	1.65996e-15	6.53658e-13	A3SS	Pre vs Post
ENSSSCG00000001229	7:22826272-22826440	-0.182896	1.32176e-12	3.93252e-10	A5SS	Pre vs Post
ENSSSCG00000001229	7:22889305-22889419	-0.166946	4.05923e-12	1.09792e-09	A3SS	Pre vs Post
ENSSSCG00000001229	7:22919170-22919250	-0.0491416	2.59912e-09	4.67091e-07	AltStart	Pre vs Post
ENSSSCG00000001229	7:22825525-22825605	-0.106335	2.63221e-07	2.86515e-05	AltStart	Pre vs Post
ENSSSCG00000001229	7:22868502-22868739	-0.796296	2.84834e-06	0.000220201	MXE	Pre vs Post
ENSSSCG00000001229	7:22826663-22826720	0.0309499	0.000108688	0.00401956	A5SS	Pre vs Post
ENSSSCG00000001229	7:22938303-22938383	0.0855271	0.000440186	0.0112793	AltStart	Pre vs Post
ENSSSCG00000001229	7:22941376-22941456	0.0744714	0.00215367	0.0322352	AltEnd	Pre vs Post
ENSSSCG00000001341	7:23046583-23046804	0.764706	2.64335e-10	5.74629e-08	MXE	Pre vs In
ENSSSCG00000001341	7:23022971-23023096	0.0768131	0.0035626	0.0484528	Cassette	Pre vs In
ENSSSCG00000001341	7:23022971-23023096	-0.0775002	0.000633382	0.0168487	Cassette	In vs Post
ENSSSCG00000001341	7:23031994-23032236	-0.598188	1.50896e-13	4.86812e-11	Cassette	Pre vs Post
ENSSSCG00000001341	7:23046583-23046804	0.750277	5.47677e-12	1.43776e-09	MXE	Pre vs Post
ENSSSCG00000001456	7:24988333-24988351	-0.962963	1.25937e-09	2.39068e-07	A5SS	Pre vs In
ENSSSCG00000001456	7:24990991-24991071	0.158203	0.00125172	0.0240588	AltStart	Pre vs In
ENSSSCG00000001456	7:24975460-24975729	-0.0203319	0.00139093	0.0258223	Cassette	Pre vs In
ENSSSCG00000001456	7:24991438-24991518	-0.136989	9.49458e-05	0.00403396	AltEnd	In vs Post
ENSSSCG00000001456	7:24991438-24991518	-0.159621	2.01103e-06	0.000165182	AltEnd	Pre vs Post
ENSSSCG00000001456	7:24990991-24991071	0.149383	0.00300641	0.0401109	AltStart	Pre vs Post
ENSSSCG00000002259	7:88145340-88145393	-0.200706	3.66005e-11	9.22058e-09	Cassette	Pre vs In
ENSSSCG00000002259	7:88125075-88125155	-0.022456	0.000580667	0.0137907	AltStart	Pre vs In
ENSSSCG00000002259	7:88145340-88145393	0.180118	1.93963e-09	4.1401e-07	Cassette_multi	In vs Post
ENSSSCG00000002259	7:88105684-88106523	-0.121223	0.000115483	0.00420287	AltStart	Pre vs Post
ENSSSCG00000003771	6:135313313-135313372	-0.0497877	0.00264139	0.039844	Cassette	Pre vs In
ENSSSCG00000003771	6:135289472-135289534	0.143927	3.47705e-06	0.000307189	Cassette	In vs Post
ENSSSCG00000003771	6:135289534-135290334	-0.171481	0.00317046	0.0472839	IR	In vs Post
ENSSSCG00000003771	6:135289472-135289534	0.135192	1.27074e-05	0.000751139	Cassette	Pre vs Post
ENSSSCG00000003771	6:135313598-135315243	-0.0181799	0.000923971	0.0186513	IR	Pre vs Post
ENSSSCG00000003965	6:168861088-168861267	-0.324242	0.0018901	0.0321245	Cassette	Pre vs In
ENSSSCG00000003965	6:168822878-168823015	0.36631	0.00257874	0.0392822	Cassette	Pre vs In
ENSSSCG00000003965	6:168773659-168773773	0.112903	0.00276267	0.0410306	Cassette	Pre vs In
ENSSSCG00000003965	6:168840570-168840636	0.130765	1.14846e-07	1.59594e-05	A5SS	In vs Post
ENSSSCG00000003965	6:168773659-168773773	-0.112903	0.00167757	0.0313441	Cassette	In vs Post
ENSSSCG00000003965	6:168840570-168840636	0.130091	1.35033e-07	1.6361e-05	A5SS	Pre vs Post
ENSSSCG00000003965	6:168814165-168814408	0.212121	0.00175385	0.0283592	Cassette	Pre vs Post
ENSSSCG00000003965	6:168787643-168787723	0.0684932	0.00328159	0.0423884	AltEnd	Pre vs Post
ENSSSCG00000004081	1:13715672-13715895	-0.373659	0.000610329	0.0143435	AltStart	Pre vs In
ENSSSCG00000004081	1:14029190-14029198	-0.0796775	0.000631239	0.0168085	Cassette	In vs Post
ENSSSCG00000004081	1:13873013-13873093	-0.0550459	0.00214521	0.0370362	AltStart	In vs Post
ENSSSCG00000004081	1:14029190-14029198	-0.113924	1.07818e-13	3.60881e-11	Cassette	Pre vs Post
ENSSSCG00000004081	1:14029079-14029088	0.0466667	0.000607918	0.0141059	A5SS	Pre vs Post
ENSSSCG00000004081	1:13715672-13715895	-0.341429	0.00127133	0.0231897	AltStart	Pre vs Post
ENSSSCG00000004082	1:14191923-14191981	0.104303	1.89698e-06	0.000167108	Cassette	Pre vs In
ENSSSCG00000004082	1:14174855-14174969	-0.75	0.00250739	0.0407181	A3SS	In vs Post
ENSSSCG00000004082	1:14191923-14191981	0.0661554	0.000935073	0.0188401	Cassette	Pre vs Post
ENSSSCG00000004489	1:92422691-92422785	4.6855e-05	7.71503e-13	2.70086e-10	IR	Pre vs In
ENSSSCG00000004489	1:92423077-92423148	1	7.31629e-05	0.00306239	A3SS	Pre vs In
ENSSSCG00000004489	1:92423527-92423637	0.818182	0.00187713	0.0319645	A5SS	Pre vs In
ENSSSCG00000004489	1:92423793-92423873	0.647059	0.00335546	0.0467036	AltStart	Pre vs In
ENSSSCG00000004489	1:92424649-92424826	-1.4426e-05	1.39962e-30	2.48955e-27	IR	In vs Post
ENSSSCG00000004489	1:92422691-92422785	-4.88042e-05	1.83759e-06	0.000182943	IR	In vs Post
ENSSSCG00000004489	1:92424141-92424221	-0.268293	0.000301174	0.00979955	AltStart	In vs Post
ENSSSCG00000004489	1:92424540-92424641	-0.000512403	0.000326026	0.00910323	IR	Pre vs Post
ENSSSCG00000006179	4:62140516-62140587	0.0369419	1.05331e-05	0.000649725	AltStart	Pre vs In
ENSSSCG00000006179	4:62140255-62140269	-0.117439	0.000104296	0.00401056	Cassette	Pre vs In
ENSSSCG00000006179	4:62140516-62140587	-0.0553172	2.11255e-07	2.72295e-05	AltStart	In vs Post
ENSSSCG00000006179	4:62162191-62162321	-0.129636	0.00216458	0.0371899	Cassette	In vs Post
ENSSSCG00000006179	4:62140278-62140358	0.0216049	0.00264858	0.0419636	AltStart	In vs Post
ENSSSCG00000006179	4:62140255-62140269	-0.172583	1.04569e-08	1.64709e-06	Cassette	Pre vs Post
ENSSSCG00000006179	4:62140278-62140358	0.0338983	4.06002e-05	0.0018973	AltStart	Pre vs Post
ENSSSCG00000007001	17:58822-58850	0.0961538	3.37462e-05	0.00169082	Cassette	Pre vs In
ENSSSCG00000007001	17:178612-178692	-0.0630867	1.89891e-06	0.000187648	AltStart	In vs Post
ENSSSCG00000007001	17:29686-29766	-0.695402	0.000174205	0.0064825	AltEnd	In vs Post
ENSSSCG00000007001	17:99772-99841	0.5	0.00078446	0.019344	MXE	In vs Post
ENSSSCG00000007001	17:58822-58850	0.130081	2.98998e-07	3.18975e-05	Cassette	Pre vs Post
ENSSSCG00000007512	17:58442727-58442847	-0.26539	0.00108714	0.0218206	Cassette_multi	Pre vs In
ENSSSCG00000007512	17:58458550-58458673	-0.513458	8.03497e-06	0.000617988	Cassette_multi	In vs Post
ENSSSCG00000007512	17:58442727-58442847	-0.20625	0.000371952	0.0099317	Cassette_multi	Pre vs Post
ENSSSCG00000007512	17:58489741-58489898	-0.195599	0.000421947	0.010927	Cassette	Pre vs Post
ENSSSCG00000009430	11:24735472-24735539	0.0383845	0.000436082	0.0113356	Cassette	Pre vs In
ENSSSCG00000009430	11:24714992-24715075	-0.136367	2.05711e-06	0.000201786	Cassette	In vs Post
ENSSSCG00000009430	11:24714992-24715075	-0.159043	3.77366e-08	5.1979e-06	Cassette	Pre vs Post
ENSSSCG00000009430	11:24747536-24747669	0.0750939	0.00221687	0.032853	Cassette	Pre vs Post
ENSSSCG00000010893	AEMK02000698.1:2553865-2558466	0.189655	4.16487e-19	2.61089e-16	MXE	Pre vs In
ENSSSCG00000010893	AEMK02000698.1:2549880-2550053	0.126984	3.04953e-11	7.90415e-09	MXE	Pre vs In
ENSSSCG00000010893	AEMK02000698.1:2549880-2550053	0.809186	2.97654e-22	3.60986e-19	MXE	In vs Post
ENSSSCG00000010893	AEMK02000698.1:2549880-2550053	0.93617	1.76542e-48	3.15151e-45	MXE	Pre vs Post
ENSSSCG00000010893	AEMK02000698.1:2553865-2556119	-0.699234	1.33644e-33	1.3254e-30	MXE	Pre vs Post
ENSSSCG00000012046	13:197985467-197985547	0.136824	8.20623e-07	8.254e-05	AltStart	Pre vs In
ENSSSCG00000012046	13:197987770-197987807	-0.75	2.25936e-06	0.000190323	Cassette	Pre vs In
ENSSSCG00000012046	13:197988534-197988576	-0.0966085	9.05699e-05	0.00357977	Cassette_multi	Pre vs In
ENSSSCG00000012046	13:197987853-197987885	0.461538	0.000110822	0.00448688	Cassette	In vs Post
ENSSSCG00000012046	13:197988534-197988580	0.0950436	0.000324508	0.0103443	Cassette_multi	In vs Post
ENSSSCG00000012046	13:197985467-197985547	0.114297	0.000227512	0.00708239	AltStart	Pre vs Post
ENSSSCG00000013880	2:60067696-60067725	0.100073	9.10163e-06	0.000583224	Cassette	Pre vs In
ENSSSCG00000013880	2:60093270-60093275	0.119876	0.00012014	0.0044363	Cassette	Pre vs In
ENSSSCG00000013880	2:60093119-60093125	-0.153342	0.0030261	0.0435008	A5SS	Pre vs In
ENSSSCG00000013880	2:60112460-60112500	-0.154978	0.00198726	0.0349059	Cassette_multi	In vs Post
ENSSSCG00000013880	2:60067696-60067725	0.100993	5.32467e-06	0.000371299	Cassette	Pre vs Post
ENSSSCG00000013880	2:60093270-60093275	0.102869	0.000972425	0.0192736	Cassette	Pre vs Post
ENSSSCG00000013880	2:60112460-60112500	-0.175439	0.00217591	0.0324592	Cassette_multi	Pre vs Post
ENSSSCG00000015814	15:47754306-47754374	-0.0275921	9.7759e-13	3.29399e-10	AltEnd	Pre vs In
ENSSSCG00000015814	15:47775312-47775366	-0.0402685	0.000202841	0.0073135	Cassette	In vs Post
ENSSSCG00000015814	15:47754306-47754374	-0.0624083	0.000230334	0.00799159	AltEnd	In vs Post
ENSSSCG00000015814	15:47754306-47754374	-0.0900004	1.11371e-06	9.87476e-05	AltEnd	Pre vs Post
ENSSSCG00000015814	15:47775312-47775366	-0.0358825	0.000987365	0.0194672	Cassette	Pre vs Post
ENSSSCG00000020677	6:158146698-158146778	-0.275102	2.34627e-06	0.000195808	AltEnd	Pre vs In
ENSSSCG00000020677	6:158157021-158157101	0.176471	0.00309711	0.046662	AltEnd	In vs Post
ENSSSCG00000020677	6:158146698-158146778	-0.367111	1.90192e-11	4.67227e-09	AltEnd	Pre vs Post
ENSSSCG00000021767	14:14583583-14583674	0.32634	7.56397e-11	1.75771e-08	Cassette	Pre vs In
ENSSSCG00000021767	14:14583583-14583674	-0.257576	0.000368422	0.011186	Cassette	In vs Post
ENSSSCG00000021767	14:14583583-14583674	0.0687646	0.00181661	0.0288857	Cassette	Pre vs Post
ENSSSCG00000021977	13:18175287-18175315	-0.0486891	0.000241354	0.0074642	IR	Pre vs In
ENSSSCG00000021977	13:18137066-18137146	0.0203046	0.00119002	0.023245	AltStart	Pre vs In
ENSSSCG00000021977	13:18175289-18175315	-0.0308483	5.13429e-14	2.24571e-11	IR	In vs Post
ENSSSCG00000021977	13:18175287-18175315	-0.0486891	2.18181e-06	0.000176503	IR	Pre vs Post
ENSSSCG00000030478	5:89645332-89645412	-0.042328	0.000215824	0.00686866	AltStart	Pre vs In
ENSSSCG00000030478	5:89659875-89659929	0.166249	0.000599999	0.0161703	A3SS	In vs Post
ENSSSCG00000030478	5:89659875-89659929	0.184431	0.000171038	0.00561949	A3SS	Pre vs Post
ENSSSCG00000030478	5:89645332-89649870	-0.106061	0.00214995	0.0322335	AltStart	Pre vs Post
ENSSSCG00000032459	6:67636673-67636735	-0.0574684	0.000323739	0.00915709	Cassette	Pre vs In
ENSSSCG00000032459	6:67636673-67636735	0.589286	7.60799e-05	0.00346246	MXE	In vs Post
ENSSSCG00000032459	6:67634953-67635022	0.0599967	2.66688e-05	0.00136021	Cassette_multi	Pre vs Post
ENSSSCG00000033790	4:110455744-110455844	-0.649842	2.60379e-23	2.12691e-20	Cassette_multi	Pre vs In
ENSSSCG00000033790	4:110444064-110444107	0.964307	4.71968e-13	1.674e-10	MXE	Pre vs In
ENSSSCG00000033790	4:110445174-110445254	0.257749	2.88056e-11	7.53868e-09	AltEnd	Pre vs In
ENSSSCG00000033790	4:110457145-110457225	0.18099	1.71879e-07	1.98848e-05	AltStart	Pre vs In
ENSSSCG00000033790	4:110415608-110415688	0.0920521	1.10995e-06	0.000105724	AltEnd	Pre vs In
ENSSSCG00000033790	4:110432757-110432821	0.482759	3.5761e-05	0.00177201	MXE	Pre vs In
ENSSSCG00000033790	4:110448133-110448213	0.0309677	0.000739228	0.0165229	AltEnd	Pre vs In
ENSSSCG00000033790	4:110479500-110479700	0.104647	0.00128702	0.0244417	A5SS	Pre vs In
ENSSSCG00000033790	4:110457145-110457225	-0.227345	3.24703e-05	0.00183547	AltStart	In vs Post
ENSSSCG00000033790	4:110479500-110479700	-0.0941566	0.00260464	0.0416143	A5SS	In vs Post
ENSSSCG00000033790	4:110475630-110475658	0.0980882	0.000175237	0.00572932	Cassette	Pre vs Post
ENSSSCG00000034276	9:74416676-74416749	-0.0858668	0.000146805	0.00515269	Cassette	Pre vs In
ENSSSCG00000034276	9:74457466-74457546	0.0587622	0.000426362	0.0124871	AltStart	In vs Post
ENSSSCG00000034276	9:74417052-74417078	0.0583127	0.000600178	0.0139748	Cassette_multi	Pre vs Post
ENSSSCG00000034276	9:74457439-74457519	0.0337838	0.00254621	0.0357524	AltEnd	Pre vs Post
ENSSSCG00000035000	3:24296776-24296808	0.4	0.00163641	0.0291162	MXE	Pre vs In
ENSSSCG00000035000	3:24408143-24408324	-0.177567	0.0021263	0.0346953	Cassette	Pre vs In
ENSSSCG00000035000	3:24296776-24296808	-0.526316	6.54415e-07	7.49407e-05	Cassette	In vs Post
ENSSSCG00000035000	3:24408143-24408324	0.226774	6.66318e-05	0.00315213	Cassette	In vs Post
ENSSSCG00000035000	3:24462285-24462328	-0.333333	0.000892426	0.0208867	A3SS	In vs Post
ENSSSCG00000035000	3:24390649-24390766	-0.916667	3.7853e-08	5.1979e-06	MXE	Pre vs Post
ENSSSCG00000035000	3:24341887-24341965	-0.282051	0.00250145	0.0353464	A5SS	Pre vs Post
ENSSSCG00000036083	14:102949825-102949884	0.0683519	0.000253258	0.00774015	Cassette	Pre vs In
ENSSSCG00000036083	14:102956112-102961855	-0.0807841	7.19704e-14	3.048e-11	AltEnd	In vs Post
ENSSSCG00000036083	14:102949825-102949884	0.0793936	6.02958e-05	0.00253859	Cassette	Pre vs Post
ENSSSCG00000036669	2:9210985-9211074	-0.289786	1.2589e-25	1.25685e-22	A5SS	Pre vs In
ENSSSCG00000036669	2:9206857-9207030	-0.732759	7.47195e-21	5.30037e-18	MXE	Pre vs In
ENSSSCG00000036669	2:9209971-9210066	-0.20699	4.88188e-16	2.48294e-13	Cassette	Pre vs In
ENSSSCG00000036669	2:9205802-9205879	0.419619	8.20789e-16	4.02276e-13	Cassette	Pre vs In
ENSSSCG00000036669	2:9203456-9203533	-0.677419	3.62766e-13	1.32145e-10	Cassette	Pre vs In
ENSSSCG00000036669	2:9211075-9211362	0.507191	3.92738e-13	1.41155e-10	Cassette	Pre vs In
ENSSSCG00000036669	2:9210181-9210214	-1	7.9248e-13	2.73873e-10	MXE	Pre vs In
ENSSSCG00000036669	2:9211693-9211698	0.356541	3.93687e-12	1.2198e-09	Cassette	Pre vs In
ENSSSCG00000036669	2:9211651-9211692	-0.19917	3.81627e-11	9.52514e-09	MXE	Pre vs In
ENSSSCG00000036669	2:9211370-9211411	0.215506	4.94916e-10	9.95594e-08	A3SS	Pre vs In
ENSSSCG00000036669	2:9209916-9209970	-0.112391	1.49879e-09	2.82528e-07	A5SS	Pre vs In
ENSSSCG00000036669	2:9210883-9210924	0.133304	1.8208e-09	3.33888e-07	MXE	Pre vs In
ENSSSCG00000036669	2:9201266-9201391	-0.251216	9.18451e-09	1.47368e-06	MXE	Pre vs In
ENSSSCG00000036669	2:9206200-9206479	0.188034	1.60077e-08	2.41063e-06	Cassette	Pre vs In
ENSSSCG00000036669	2:9206682-9206716	0.315874	5.71895e-08	7.63169e-06	A5SS	Pre vs In
ENSSSCG00000036669	2:9211573-9211650	-0.303648	1.01463e-07	1.24888e-05	MXE	Pre vs In
ENSSSCG00000036669	2:9205880-9206184	0.581132	1.85699e-07	2.11211e-05	Cassette	Pre vs In
ENSSSCG00000036669	2:9209447-9209593	-0.198954	1.45362e-06	0.000133278	Cassette	Pre vs In
ENSSSCG00000036669	2:9212227-9212242	-0.842105	1.58708e-06	0.000143562	A3SS	Pre vs In
ENSSSCG00000036669	2:9209299-9209412	-0.257589	3.0379e-06	0.000236675	MXE	Pre vs In
ENSSSCG00000036669	2:9208915-9209202	-0.149536	1.70154e-05	0.000969699	Cassette	Pre vs In
ENSSSCG00000036669	2:9209210-9209250	0.223543	0.000177017	0.0058837	Cassette	Pre vs In
ENSSSCG00000036669	2:9205415-9205495	-0.275559	0.000210214	0.00674453	AltStart	Pre vs In
ENSSSCG00000036669	2:9202802-9202882	-0.0913755	0.000320936	0.00911204	AltEnd	Pre vs In
ENSSSCG00000036669	2:9211747-9211827	0.0791326	0.00103071	0.020969	AltEnd	Pre vs In
ENSSSCG00000036669	2:9184934-9185014	-0.017471	0.00126278	0.0241758	AltStart	Pre vs In
ENSSSCG00000036669	2:9209683-9209874	0.160427	0.0028823	0.0422947	Cassette	Pre vs In
ENSSSCG00000036669	2:9201396-9201526	-1	5.68409e-36	1.51657e-32	MXE	In vs Post
ENSSSCG00000036669	2:9201044-9201257	0.506667	1.41196e-24	2.09291e-21	MXE	In vs Post
ENSSSCG00000036669	2:9209177-9209250	0.638775	2.53647e-18	1.82907e-15	Cassette	In vs Post
ENSSSCG00000036669	2:9210985-9211074	0.289786	5.54472e-18	3.7933e-15	A5SS	In vs Post
ENSSSCG00000036669	2:9211370-9211458	0.251011	3.90672e-14	1.79716e-11	MXE	In vs Post
ENSSSCG00000036669	2:9205370-9205432	-1	4.48275e-13	1.68457e-10	Cassette	In vs Post
ENSSSCG00000036669	2:9211223-9211322	0.974359	3.98629e-12	1.36357e-09	A3SS	In vs Post
ENSSSCG00000036669	2:9211843-9211923	0.156617	4.3847e-11	1.29987e-08	AltEnd	In vs Post
ENSSSCG00000036669	2:9207101-9207160	-0.664164	7.93174e-11	2.27556e-08	Cassette	In vs Post
ENSSSCG00000036669	2:9209594-9209682	0.31331	6.66118e-10	1.55901e-07	MXE	In vs Post
ENSSSCG00000036669	2:9203186-9203455	-0.559199	1.3412e-08	2.41788e-06	MXE	In vs Post
ENSSSCG00000036669	2:9209971-9210066	-0.152066	2.04695e-08	3.47864e-06	MXE	In vs Post
ENSSSCG00000036669	2:9211699-9211746	0.383886	3.43205e-08	5.61782e-06	Cassette	In vs Post
ENSSSCG00000036669	2:9211747-9211827	-0.179738	5.31548e-08	8.39185e-06	AltEnd	In vs Post
ENSSSCG00000036669	2:9209533-9209586	-0.10298	7.21546e-08	1.06953e-05	MXE	In vs Post
ENSSSCG00000036669	2:9205880-9205969	0.755102	7.68867e-08	1.13338e-05	Cassette	In vs Post
ENSSSCG00000036669	2:9203456-9203533	-0.227787	9.1048e-08	1.33475e-05	Cassette	In vs Post
ENSSSCG00000036669	2:9210937-9210978	0.387374	9.35164e-08	1.35604e-05	A5SS	In vs Post
ENSSSCG00000036669	2:9206569-9206802	0.229505	1.08629e-07	1.52544e-05	Cassette	In vs Post
ENSSSCG00000036669	2:9205586-9205801	1	8.52318e-07	9.28192e-05	A5SS	In vs Post
ENSSSCG00000036669	2:9204092-9205054	1	1.21397e-05	0.000856878	MXE	In vs Post
ENSSSCG00000036669	2:9210181-9210214	0.375695	2.48117e-05	0.00149535	MXE	In vs Post
ENSSSCG00000036669	2:9206803-9206952	0.145416	5.79751e-05	0.00283303	Cassette	In vs Post
ENSSSCG00000036669	2:9212227-9212305	0.323015	0.000100256	0.00417957	A3SS	In vs Post
ENSSSCG00000036669	2:9209891-9209970	0.128621	0.000232287	0.00803847	MXE	In vs Post
ENSSSCG00000036669	2:9206200-9206298	0.13986	0.00115158	0.0244824	MXE	In vs Post
ENSSSCG00000036669	2:9210883-9210899	0.322234	0.00216747	0.0371899	A3SS	In vs Post
ENSSSCG00000036669	2:9200597-9200982	-0.0067893	0.00301301	0.0457542	IR	In vs Post
ENSSSCG00000036669	2:9209971-9210066	-0.227215	2.05014e-19	1.16801e-16	Cassette	Pre vs Post
ENSSSCG00000036669	2:9203456-9203533	0.610169	5.70833e-19	3.05704e-16	MXE	Pre vs Post
ENSSSCG00000036669	2:9206803-9206856	0.262965	2.1004e-15	8.15109e-13	Cassette	Pre vs Post
ENSSSCG00000036669	2:9201649-9201697	0.857143	5.8252e-14	1.99976e-11	A5SS	Pre vs Post
ENSSSCG00000036669	2:9209149-9209250	0.769777	1.88108e-10	4.06208e-08	Cassette	Pre vs Post
ENSSSCG00000036669	2:9209586-9209593	0.189004	2.93062e-10	6.13073e-08	A5SS	Pre vs Post
ENSSSCG00000036669	2:9211309-9211314	0.647059	3.75325e-10	7.67181e-08	MXE	Pre vs Post
ENSSSCG00000036669	2:9201526-9201601	1	5.81633e-09	9.73399e-07	A5SS	Pre vs Post
ENSSSCG00000036669	2:9211843-9211923	0.136661	1.15003e-08	1.79036e-06	AltEnd	Pre vs Post
ENSSSCG00000036669	2:9203024-9203071	-0.477997	1.35566e-08	2.05087e-06	MXE	Pre vs Post
ENSSSCG00000036669	2:9201011-9201043	-0.384084	1.77514e-08	2.64071e-06	A5SS	Pre vs Post
ENSSSCG00000036669	2:9210925-9210978	-0.429675	1.94068e-07	2.23028e-05	Cassette	Pre vs Post
ENSSSCG00000036669	2:9203408-9203455	-0.272975	2.53417e-06	0.000199581	MXE	Pre vs Post
ENSSSCG00000036669	2:9203072-9203150	-0.414747	2.99271e-06	0.00022896	A3SS	Pre vs Post
ENSSSCG00000036669	2:9211651-9211692	-0.466843	1.07144e-05	0.00065738	MXE	Pre vs Post
ENSSSCG00000036669	2:9210883-9210924	0.16376	4.01558e-05	0.0018831	Cassette	Pre vs Post
ENSSSCG00000036669	2:9211370-9211458	0.0767232	9.23948e-05	0.00354449	MXE	Pre vs Post
ENSSSCG00000036669	2:9184934-9185014	-0.0258487	0.000109733	0.00404375	AltStart	Pre vs Post
ENSSSCG00000036669	2:9205370-9205495	-0.220779	0.000142463	0.00492224	Cassette	Pre vs Post
ENSSSCG00000036669	2:9211747-9211827	-0.0999837	0.000219651	0.00690329	AltEnd	Pre vs Post
ENSSSCG00000036669	2:9209916-9209929	-0.236559	0.00023144	0.00714796	A5SS	Pre vs Post
ENSSSCG00000036669	2:9212242-9212305	0.239162	0.000453089	0.0115614	A3SS	Pre vs Post
ENSSSCG00000036669	2:9209594-9209635	0.626333	0.000769764	0.0164501	A3SS	Pre vs Post
ENSSSCG00000036669	2:9209683-9209874	0.145977	0.000819121	0.0170557	Cassette	Pre vs Post
ENSSSCG00000036669	2:9210181-9210882	0.0822642	0.002682	0.0371333	Cassette	Pre vs Post
ENSSSCG00000036669	2:9201266-9201391	0.3177	0.00352522	0.0443169	MXE	Pre vs Post
ENSSSCG00000037115	7:17359286-17359310	1	6.87451e-176	1.85309e-171	MXE	Pre vs In
ENSSSCG00000037115	7:17425462-17425509	-0.491081	2.80849e-78	7.57058e-75	Cassette	Pre vs In
ENSSSCG00000037115	7:17461271-17461280	0.541096	1.05685e-15	4.99797e-13	A5SS	Pre vs In
ENSSSCG00000037115	7:17332398-17332410	-0.857143	4.87762e-08	6.60709e-06	A5SS	Pre vs In
ENSSSCG00000037115	7:17451585-17451619	4.98725e-08	5.02896e-08	6.7443e-06	IR	Pre vs In
ENSSSCG00000037115	7:17359286-17359310	-0.701762	7.50024e-70	4.00228e-66	MXE	In vs Post
ENSSSCG00000037115	7:17332403-17332412	0.92381	2.32847e-22	2.95837e-19	A5SS	In vs Post
ENSSSCG00000037115	7:17461208-17461238	1	3.99557e-22	4.63503e-19	MXE	In vs Post
ENSSSCG00000037115	7:17454151-17454193	1	5.32527e-20	5.26236e-17	MXE	In vs Post
ENSSSCG00000037115	7:17458427-17458454	0.323944	0.000115823	0.00462709	A5SS	In vs Post
ENSSSCG00000037115	7:17461183-17461242	2.84666e-05	0.00130263	0.026694	IR	In vs Post
ENSSSCG00000037115	7:17451585-17451619	-4.91871e-06	0.00324982	0.0477523	IR	In vs Post
ENSSSCG00000037115	7:17359286-17359310	0.257875	4.03624e-35	4.69905e-32	Cassette	Pre vs Post
ENSSSCG00000037115	7:17425462-17425502	-0.135394	1.92213e-22	1.35444e-19	Cassette	Pre vs Post
ENSSSCG00000037115	7:17451585-17451619	-4.86883e-06	1.16905e-16	5.21726e-14	IR	Pre vs Post
ENSSSCG00000037115	7:17461271-17461280	0.407407	5.70483e-10	1.13154e-07	A5SS	Pre vs Post
ENSSSCG00000037115	7:17463627-17463637	0.516129	7.64375e-08	9.88777e-06	A3SS	Pre vs Post
ENSSSCG00000037214	14:49010449-49010541	-0.0913874	3.17895e-15	1.4282e-12	A3SS	Pre vs In
ENSSSCG00000037214	14:48949853-48949933	-1	8.47007e-15	3.62412e-12	AltStart	Pre vs In
ENSSSCG00000037214	14:49005965-49005999	-0.26715	9.71835e-10	1.8712e-07	MXE	Pre vs In
ENSSSCG00000037214	14:49004308-49004398	0.213365	4.97696e-05	0.00256277	MXE	In vs Post
ENSSSCG00000037214	14:49010449-49010541	0.0913874	0.000596077	0.0160808	A3SS	In vs Post
ENSSSCG00000037214	14:49001109-49001189	-0.325543	0.00148351	0.02578	AltStart	Pre vs Post
ENSSSCG00000037214	14:49004187-49004307	-0.00626915	0.00412241	0.0496299	Cassette	Pre vs Post
ENSSSCG00000037775	AEMK02000452.1:3699043-3699123	0.0891729	4.11389e-10	8.40106e-08	AltStart	Pre vs In
ENSSSCG00000037775	AEMK02000452.1:3772920-3773000	0.0639036	1.32807e-07	1.57707e-05	AltStart	Pre vs In
ENSSSCG00000037775	AEMK02000452.1:3659472-3659589	-0.114352	3.94868e-07	4.20714e-05	Cassette	Pre vs In
ENSSSCG00000037775	AEMK02000452.1:3760640-3760720	0.0773264	0.000115147	0.00429904	AltEnd	Pre vs In
ENSSSCG00000037775	AEMK02000452.1:3768281-3768438	-0.220202	0.0015	0.0272834	A5SS	Pre vs In
ENSSSCG00000037775	AEMK02000452.1:3772920-3773000	-0.174427	2.50012e-14	1.19117e-11	AltStart	In vs Post
ENSSSCG00000037775	AEMK02000452.1:3659472-3659589	0.127424	3.32786e-06	0.000294986	Cassette	In vs Post
ENSSSCG00000037775	AEMK02000452.1:3760640-3760720	-0.114019	9.6275e-05	0.00407086	AltEnd	In vs Post
ENSSSCG00000037775	AEMK02000452.1:3768281-3768438	0.311111	0.000219143	0.00776488	A5SS	In vs Post
ENSSSCG00000037775	AEMK02000452.1:3772920-3773000	-0.229507	0.000663232	0.0148988	AltStart	Pre vs Post
ENSSSCG00000037808	4:110424155-110424235	-0.0978185	9.46529e-06	0.000600344	AltEnd	Pre vs In
ENSSSCG00000037808	4:110432757-110432821	0.482759	2.38231e-05	0.00125917	MXE	Pre vs In
ENSSSCG00000037808	4:110454882-110454926	-0.0807249	0.000325234	0.00917052	A5SS	Pre vs In
ENSSSCG00000037808	4:110444991-110445071	-0.337836	3.60734e-21	4.01031e-18	AltEnd	In vs Post
ENSSSCG00000037808	4:110444991-110445254	-0.347378	2.92346e-09	5.9775e-07	AltEnd	In vs Post
ENSSSCG00000037808	4:110444022-110444063	-0.604199	4.18812e-05	0.00224384	A3SS	In vs Post
ENSSSCG00000037808	4:110445552-110445632	-0.0786828	0.000459554	0.0132269	AltStart	In vs Post
ENSSSCG00000037808	4:110445552-110445632	-0.116708	1.04973e-07	1.3385e-05	AltStart	Pre vs Post
ENSSSCG00000037808	4:110432510-110432821	0.794286	6.71117e-07	6.41804e-05	MXE	Pre vs Post
ENSSSCG00000037808	4:110424155-110424235	-0.044495	4.66994e-05	0.00210872	AltEnd	Pre vs Post
ENSSSCG00000037808	4:110455282-110455390	0.102311	5.86996e-05	0.00248309	Cassette	Pre vs Post
ENSSSCG00000037808	4:110480859-110481180	-0.00900225	0.00170552	0.0279112	A5SS	Pre vs Post
ENSSSCG00000037808	4:110457537-110457617	0.084296	0.00367579	0.0454677	AltStart	Pre vs Post
ENSSSCG00000037997	10:11048470-11048513	0.742857	2.97929e-06	0.000234139	Cassette	Pre vs In
ENSSSCG00000037997	10:11048470-11048513	-1	3.89086e-13	1.48303e-10	Cassette	In vs Post
ENSSSCG00000037997	10:11048470-11048513	-0.257143	1.27717e-05	0.000753276	Cassette	Pre vs Post
ENSSSCG00000038719	14:49001280-49001331	0.549536	1.05526e-16	5.92615e-14	A5SS	Pre vs In
ENSSSCG00000038719	14:49007424-49007514	0.241685	3.14888e-11	8.08393e-09	MXE	Pre vs In
ENSSSCG00000038719	14:49004399-49005603	-0.135078	0.00010241	0.00396062	AltEnd	Pre vs In
ENSSSCG00000038719	14:49001109-49001189	0.183029	0.000144422	0.00510801	AltStart	Pre vs In
ENSSSCG00000038719	14:49005965-49005999	-0.171447	0.00208697	0.0343446	Cassette	Pre vs In
ENSSSCG00000038719	14:49007424-49007514	0.260423	7.72636e-05	0.00349995	Cassette	In vs Post
ENSSSCG00000038719	14:49004187-49004398	0.138535	0.000225518	0.00787572	Cassette	In vs Post
ENSSSCG00000038719	14:49001280-49001331	-0.243531	0.00252983	0.0408834	A5SS	In vs Post
ENSSSCG00000038719	14:49007566-49007622	0.165524	0.00290609	0.0446386	Cassette	In vs Post
ENSSSCG00000038719	14:49001109-49001189	-0.183029	0.00332699	0.048401	AltStart	In vs Post
ENSSSCG00000038719	14:49007424-49007514	0.493364	3.42221e-10	7.04896e-08	MXE	Pre vs Post
ENSSSCG00000038719	14:49001280-49001331	0.306005	8.85427e-06	0.000565792	A5SS	Pre vs Post
ENSSSCG00000038719	14:49010541-49010740	-0.0276912	0.000762661	0.0163505	A3SS	Pre vs Post
ENSSSCG00000039200	6:7176284-7176318	0.323529	8.24588e-06	0.000538198	Cassette	Pre vs In
ENSSSCG00000039200	6:7097680-7097819	0.409091	0.000395113	0.0117671	Cassette	In vs Post
ENSSSCG00000039200	6:7175730-7175810	-0.228571	1.56281e-05	0.00088555	AltStart	Pre vs Post
ENSSSCG00000039200	6:7176144-7176284	-0.666667	0.00131591	0.023744	A3SS	Pre vs Post
ENSSSCG00000039200	6:7097680-7097819	0.346154	0.0026697	0.0370374	Cassette	Pre vs Post
ENSSSCG00000039368	10:25772141-25772243	-0.222093	0.00292067	0.042695	Cassette	Pre vs In
ENSSSCG00000039368	10:25767178-25767246	0.777778	1.69468e-05	0.00112431	MXE	In vs Post
ENSSSCG00000039368	10:25765895-25765966	-0.0869565	0.000829466	0.0198897	Cassette	In vs Post
ENSSSCG00000039368	10:25772141-25772243	-0.337005	1.29895e-07	1.59412e-05	Cassette	Pre vs Post
ENSSSCG00000039368	10:25767178-25767246	0.857143	4.27248e-06	0.000307538	MXE	Pre vs Post
ENSSSCG00000039813	8:113248983-113249027	-0.111699	1.89061e-06	0.000167093	Cassette	Pre vs In
ENSSSCG00000039813	8:113191685-113191744	0.286667	0.000337112	0.0093973	MXE	Pre vs In
ENSSSCG00000039813	8:113306951-113306986	-0.393134	2.46964e-05	0.00149535	Cassette_multi	In vs Post
ENSSSCG00000039813	8:113269594-113269638	-0.161491	0.00166336	0.0311847	Cassette	In vs Post
ENSSSCG00000039813	8:113306951-113306986	-0.514518	5.80907e-08	7.66254e-06	Cassette_multi	Pre vs Post
ENSSSCG00000039813	8:113289657-113289680	0.239305	0.00171969	0.0279757	Cassette	Pre vs Post
ENSSSCG00000039813	8:113191685-113191744	0.275556	0.0034924	0.0440985	MXE	Pre vs Post
ENSSSCG00000040096	12:15066442-15066475	4.07611e-06	1.47729e-31	1.99109e-28	IR	Pre vs In
ENSSSCG00000040096	12:15054596-15054676	-0.11828	0.000198818	0.00644152	AltEnd	Pre vs In
ENSSSCG00000040096	12:15066031-15066058	3.08869e-06	0.000274105	0.00818191	IR	Pre vs In
ENSSSCG00000040096	12:15066442-15066475	-4.07611e-06	7.6581e-33	1.85751e-29	IR	In vs Post
ENSSSCG00000040096	12:15065652-15065678	1	1.71113e-06	0.000172935	A5SS	In vs Post
ENSSSCG00000040096	12:15065956-15066117	-1	1.35438e-34	1.45065e-31	MXE	Pre vs Post
ENSSSCG00000040096	12:15065765-15065956	-0.00252817	4.32603e-16	1.78212e-13	IR	Pre vs Post
ENSSSCG00000040096	12:15065652-15065678	1	1.56427e-05	0.00088555	A5SS	Pre vs Post
ERC2	13:38057790-38057831	-0.216078	2.4168e-05	0.00127241	Cassette	Pre vs In
ERC2	13:38057790-38057831	0.603257	2.1241e-29	3.54207e-26	Cassette	In vs Post
ERC2	13:37932602-37932699	-0.416667	0.00112158	0.0241136	Cassette	In vs Post
ERC2	13:38057790-38057831	0.387179	7.53168e-10	1.47209e-07	Cassette	Pre vs Post
ERMARD	1:538424-538474	-0.405674	6.58341e-05	0.00284851	AltStart	Pre vs In
ERMARD	1:538424-538474	0.366667	0.00122046	0.0254997	AltStart	In vs Post
ERMARD	1:534082-534127	0.0555556	2.91251e-05	0.00147148	A5SS	Pre vs Post
ERMARD	1:533933-534081	0	0.000652262	0.0147017	A3SS	Pre vs Post
ESYT2	18:584765-584845	-0.0652174	0.000377568	0.0102289	AltStart	Pre vs In
ESYT2	18:584765-584845	0.0652174	0.000705164	0.0179942	AltStart	In vs Post
ESYT2	18:607831-607911	0.0273224	0.000944808	0.0189572	AltEnd	Pre vs Post
ESYT2	18:607618-607769	0.0273224	0.00137253	0.0244689	A5SS	Pre vs Post
ESYT2	18:622028-622129	-0.26372	0.00345115	0.0438177	Cassette	Pre vs Post
EXT2	2:18226070-18226125	0.109548	5.14775e-06	0.000372018	Cassette	Pre vs In
EXT2	2:18200468-18200548	-0.0595238	2.31278e-05	0.00142182	AltEnd	In vs Post
EXT2	2:18200468-18200548	-0.0595238	1.1622e-05	0.000695375	AltEnd	Pre vs Post
EYA4	1:30444609-30444689	0.0687023	4.38427e-05	0.00210289	AltStart	Pre vs In
EYA4	1:30317624-30317642	0.189231	0.000799263	0.019475	A5SS	In vs Post
EYA4	1:30533381-30533472	0.568182	0.00108942	0.0207922	A5SS	Pre vs Post
EYA4	1:30444609-30444689	0.0569376	0.00191852	0.0299197	AltStart	Pre vs Post
FBXO6	6:71761637-71761730	-0.166939	0.00209011	0.0343543	Cassette	Pre vs In
FBXO6	6:71755718-71755748	0.857143	1.68113e-06	0.000171199	A5SS	In vs Post
FBXO6	6:71761637-71761730	0.287785	0.000805532	0.0195005	MXE	In vs Post
FBXO6	6:71755667-71755748	0.548387	2.8196e-10	5.94492e-08	AltStart	Pre vs Post
FGFR1OP2	5:46808218-46808231	-0.925926	2.04972e-06	0.000177091	A3SS	Pre vs In
FGFR1OP2	5:46814491-46814561	0.0388512	0.000801493	0.0175081	Cassette	Pre vs In
FGFR1OP2	5:46808219-46808231	-0.164626	3.72838e-06	0.000327227	A3SS	In vs Post
FGFR1OP2	5:46808218-46808231	-1	6.25643e-10	1.23183e-07	A3SS	Pre vs Post
FGFR1OP2	5:46814491-46814561	0.0469484	6.96533e-05	0.00281313	Cassette	Pre vs Post
FOCAD	1:202217504-202217584	0.0334928	0.00026034	0.00789748	AltStart	Pre vs In
FOCAD	1:202254539-202254632	0.0919298	0.00209627	0.0343927	Cassette_multi	Pre vs In
FOCAD	1:202135739-202135897	-0.0435416	0.00229062	0.0363805	Cassette	Pre vs In
FOCAD	1:202135739-202135897	0.0438449	0.00139065	0.0277515	Cassette	In vs Post
FOCAD	1:202217504-202217584	0.0334928	8.20662e-05	0.00322252	AltStart	Pre vs Post
FOXP2	18:31491338-31491395	0.413462	6.965e-05	0.00296133	MXE	Pre vs In
FOXP2	18:31491338-31491395	-0.875	1.35937e-12	4.83592e-10	MXE	In vs Post
FOXP2	18:31491338-31491395	-0.461538	0.000149785	0.00507052	MXE	Pre vs Post
FRMD4A	10:48034589-48034660	-0.401961	1.15254e-05	0.000699726	Cassette	Pre vs In
FRMD4A	10:47804266-47804400	0.295122	2.54814e-06	0.000241088	AltStart	In vs Post
FRMD4A	10:47804266-47804400	0.283357	0.00365202	0.0453362	AltStart	Pre vs Post
FRMD4B	13:50629013-50629093	-0.226316	0.000270897	0.0081408	AltStart	Pre vs In
FRMD4B	13:50805976-50806260	0.285714	0.000173605	0.00646921	AltStart	In vs Post
FRMD4B	13:50629013-50629093	-0.286957	2.92231e-06	0.000224858	AltStart	Pre vs Post
FUZ	6:54820146-54820211	0.165857	5.22146e-05	0.00240598	Cassette	Pre vs In
FUZ	6:54825084-54825158	-0.0253165	0.000703068	0.0179823	Cassette	In vs Post
FUZ	6:54820146-54820211	0.183099	6.86145e-06	0.000455904	Cassette	Pre vs Post
GAPVD1	1:265951744-265951788	0.091095	0.000135005	0.00483291	Cassette_multi	Pre vs In
GAPVD1	1:266005735-266005815	0.128788	0.00178069	0.03073	Cassette	Pre vs In
GAPVD1	1:265951744-265951788	-0.124148	4.88698e-10	1.20731e-07	Cassette_multi	In vs Post
GAPVD1	1:266005735-266005815	-0.228856	2.16759e-09	4.55382e-07	Cassette	In vs Post
GAPVD1	1:265987716-265987779	-0.138507	0.000110267	0.00405581	A5SS	Pre vs Post
GH1	12:15066055-15066135	0.454545	2.71543e-07	2.98764e-05	AltStart	Pre vs In
GH1	12:15065649-15065765	-0.373737	7.50736e-06	0.000502155	MXE	Pre vs In
GH1	12:15065384-15065425	1	1.70241e-05	0.00112431	A5SS	In vs Post
GH1	12:15065649-15065765	1	2.82345e-40	3.78017e-37	MXE	Pre vs Post
GIGYF2	15:133183886-133183955	0.0688538	0.0021104	0.0345403	Cassette	Pre vs In
GIGYF2	15:133183886-133183955	-0.237097	6.12024e-20	5.83193e-17	Cassette	In vs Post
GIGYF2	15:133183886-133183955	-0.168244	3.13595e-08	4.44293e-06	Cassette	Pre vs Post
GIGYF2	15:133260065-133260145	0.0556405	0.00118295	0.0220125	AltEnd	Pre vs Post
GLS	15:95551858-95552482	0.0879386	0.00085706	0.0184528	Cassette_multi	Pre vs In
GLS	15:95563037-95565616	-0.109291	0.00321835	0.0476053	AltEnd	In vs Post
GLS	15:95552449-95552482	0.112964	6.67703e-07	6.41804e-05	Cassette_multi	Pre vs Post
GLS	15:95563037-95565616	-0.132514	6.89392e-05	0.00279695	AltEnd	Pre vs Post
GMNN	7:19586479-19586585	0.116582	2.11069e-05	0.00114249	Cassette	Pre vs In
GMNN	7:19588298-19588324	-0.22458	0.00342154	0.0492395	A3SS	In vs Post
GMNN	7:19586479-19586585	0.107	0.00033227	0.00922947	Cassette	Pre vs Post
GPHN	7:90718359-90718430	-0.28	0.00122177	0.0236207	Cassette	Pre vs In
GPHN	7:90739422-90739447	-0.533333	2.11925e-05	0.00132421	Cassette	In vs Post
GPHN	7:90578376-90578456	-0.0426821	0.00223612	0.0378566	AltEnd	In vs Post
GPHN	7:90727598-90727678	-0.0443038	0.00315594	0.0471202	AltStart	In vs Post
GPHN	7:90739422-90739447	-0.522222	4.05401e-05	0.0018973	Cassette	Pre vs Post
GPHN	7:90828023-90828038	-0.0717949	0.0038926	0.0475294	A5SS	Pre vs Post
GPR173	X:45894868-45894954	-0.259259	0.00228686	0.0363471	Cassette_multi	Pre vs In
GPR173	X:45903901-45903997	-0.571429	0.00193825	0.0343389	Cassette	In vs Post
GPR173	X:45903901-45903997	-0.833333	0.000287378	0.00825657	Cassette	Pre vs Post
GSK3B	13:140354327-140354376	0.0621406	0.00111143	0.0221267	Cassette	Pre vs In
GSK3B	13:140329679-140329717	-0.0724971	0.00281637	0.0438667	Cassette	In vs Post
GSK3B	13:140329679-140329717	-0.0955795	6.09257e-05	0.00255306	Cassette	Pre vs Post
GTF2IRD1	3:11613492-11613548	0.10339	0.000400709	0.0106524	Cassette	Pre vs In
GTF2IRD1	3:11613492-11613548	-0.0945521	0.00221539	0.037721	Cassette	In vs Post
GTF2IRD1	3:11590100-11590180	-0.121951	0.00281069	0.0382425	AltEnd	Pre vs Post
GULP1	15:93074443-93074570	-0.0927473	0.000747698	0.0166708	Cassette	Pre vs In
GULP1	15:92823959-92824044	0.126316	0.00115859	0.022763	Cassette_multi	Pre vs In
GULP1	15:92750736-92755849	-0.155258	0.00195187	0.0328021	Cassette_multi	Pre vs In
GULP1	15:92988707-92988787	0.0197895	0.00221573	0.0356094	AltStart	Pre vs In
GULP1	15:93104814-93104894	-0.151915	0.000557471	0.0152265	AltStart	In vs Post
GULP1	15:92121864-92121920	-0.269892	0.00131936	0.0269273	Cassette	In vs Post
GULP1	15:92823959-92824044	-0.0865153	0.002295	0.0385355	Cassette_multi	In vs Post
GULP1	15:92051727-92051807	0.0543573	0.002409	0.0397738	AltEnd	In vs Post
GULP1	15:93147188-93147242	-0.137273	0.00211566	0.0318802	Cassette	Pre vs Post
GULP1	15:92988707-92988787	-0.0331183	0.00236898	0.0342332	AltStart	Pre vs Post
GULP1	15:93161099-93161179	-0.0576527	0.00401652	0.0487094	Cassette	Pre vs Post
HAGH	3:40142171-40142339	0.0471204	0.000484295	0.0122149	AltStart	Pre vs In
HAGH	3:40151147-40151227	-0.0277778	0.00258562	0.0393552	AltStart	Pre vs In
HAGH	3:40142315-40142339	-0.135051	4.88054e-05	0.00254331	A5SS	In vs Post
HAGH	3:40142315-40142339	-0.107367	0.00109112	0.0208097	A5SS	Pre vs Post
HDHD2	1:96715469-96715625	-0.228659	9.10755e-06	0.000583224	Cassette	Pre vs In
HDHD2	1:96729354-96729489	-0.0123457	0.000104863	0.00402244	AltStart	Pre vs In
HDHD2	1:96715469-96715625	0.193182	0.000667489	0.017358	Cassette	In vs Post
HDHD2	1:96729354-96729489	-0.0123457	0.00156003	0.0265561	AltStart	Pre vs Post
HECTD4	14:39449061-39449088	-0.171034	0.000225504	0.00708472	A3SS	Pre vs In
HECTD4	14:39474528-39474589	-0.135802	0.000390513	0.0116677	A3SS	In vs Post
HECTD4	14:39449061-39449088	-0.153257	0.000361096	0.00977285	A3SS	Pre vs Post
HECTD4	14:39474528-39474589	-0.117945	0.00359928	0.0449734	A3SS	Pre vs Post
HFM1	4:125531296-125531408	-0.366155	4.33027e-07	4.57752e-05	Cassette_multi	Pre vs In
HFM1	4:125531296-125531408	0.428571	7.65952e-09	1.44939e-06	Cassette	In vs Post
HFM1	4:125530485-125530565	-0.0952381	0.000807733	0.0169371	AltEnd	Pre vs Post
HFM1	4:125523927-125524007	-0.375	0.00161791	0.0270701	AltStart	Pre vs Post
HNRNPH1	2:78968915-78969004	0.28764	3.01473e-07	3.29212e-05	MXE	Pre vs In
HNRNPH1	2:78962383-78962438	0.0501111	0.00025072	0.00856526	Cassette	In vs Post
HNRNPH1	2:78968915-78969004	0.259553	5.27908e-07	5.27455e-05	MXE	Pre vs Post
HNRNPLL	3:101811530-101811673	-0.461538	0.00152766	0.0276373	Cassette	Pre vs In
HNRNPLL	3:101780176-101780247	0.0276656	0.00298764	0.0433216	Cassette_multi	Pre vs In
HNRNPLL	3:101779712-101779793	0.138816	0.000351333	0.0108414	Cassette	In vs Post
HNRNPLL	3:101811530-101811673	-0.461538	0.000204708	0.00652414	Cassette	Pre vs Post
HNRNPM	2:70837909-70838812	0.502581	4.48398e-05	0.00213552	IR	Pre vs In
HNRNPM	2:70814167-70814255	0.00362873	0.0014609	0.0266983	A3SS	Pre vs In
HNRNPM	2:70837909-70838812	-0.461165	5.00552e-05	0.00256831	IR	In vs Post
HNRNPM	2:70814167-70814255	0.0102182	8.20763e-05	0.00322252	A3SS	Pre vs Post
KIAA0930	5:4179612-4179692	-0.252482	0.0012831	0.0243916	AltStart	Pre vs In
KIAA0930	5:4183404-4183484	0.0258621	0.00176805	0.030628	AltStart	Pre vs In
KIAA0930	5:4185427-4185523	0.0414768	0.00220574	0.0355185	A3SS	Pre vs In
KIAA0930	5:4179612-4179692	0.319149	4.18154e-06	0.000365796	AltStart	In vs Post
KIAA0930	5:4183404-4183484	0.0258621	0.000154755	0.00519283	AltStart	Pre vs Post
KLHL32	1:64099220-64099307	0.207298	0.000178262	0.00591778	Cassette	Pre vs In
KLHL32	1:64127965-64128005	0.158703	4.69028e-06	0.0004069	Cassette	In vs Post
KLHL32	1:64148991-64149083	-0.0771673	0.000361603	0.00977285	Cassette	Pre vs Post
LIMCH1	8:32764336-32764410	0.13329	0.000133195	0.00479359	Cassette	Pre vs In
LIMCH1	8:32770373-32770465	0.139535	0.00058767	0.0139448	MXE	Pre vs In
LIMCH1	8:32770373-32770465	-0.117796	0.00309352	0.0466581	MXE	In vs Post
LIMCH1	8:32708675-32710415	-0.0975353	0.00148268	0.02578	Cassette	Pre vs Post
LIMCH1	8:32764336-32764410	0.105503	0.00173782	0.0281851	Cassette	Pre vs Post
LMO7	11:48029502-48029573	-0.349337	1.06346e-07	1.29713e-05	AltStart	Pre vs In
LMO7	11:48003942-48004011	0.509091	0.00125052	0.0240588	Cassette	Pre vs In
LMO7	11:48029283-48029337	0.457143	9.63145e-06	0.000711847	AltStart	In vs Post
LMO7	11:48003942-48004011	-0.523077	0.000547961	0.0150723	Cassette	In vs Post
LMO7	11:48029502-48029573	-0.236472	0.000419108	0.010885	AltStart	Pre vs Post
LMO7	11:48029283-48029337	0.301158	0.00144473	0.0252847	AltStart	Pre vs Post
LRRFIP2	13:21877543-21877623	-0.0543478	0.00131278	0.0247657	AltEnd	Pre vs In
LRRFIP2	13:21757616-21757687	0.197153	0.000403931	0.0119748	Cassette	In vs Post
LRRFIP2	13:21877543-21877623	0.0434783	0.00322581	0.0476053	AltEnd	In vs Post
LRRFIP2	13:21757616-21757687	0.158543	0.00344891	0.04381	Cassette	Pre vs Post
LTA4H	5:87503994-87504074	-0.0645774	0.000397725	0.01062	AltStart	Pre vs In
LTA4H	5:87493347-87493355	-0.0571429	0.000260135	0.00879678	A5SS	In vs Post
LTA4H	5:87503994-87504074	-0.116687	1.29657e-07	1.59412e-05	AltStart	Pre vs Post
LZIC	6:70264128-70264209	-0.0704186	0.000334123	0.00934964	Cassette	Pre vs In
LZIC	6:70264128-70264209	-0.0336538	0.00200107	0.0351254	Cassette	In vs Post
LZIC	6:70264128-70264209	-0.104072	3.06855e-09	5.3355e-07	Cassette	Pre vs Post
MAP7	1:27632736-27633327	0.104554	2.82614e-05	0.00145662	AltStart	Pre vs In
MAP7	1:27672863-27672943	0.0789211	0.000827608	0.0179189	AltStart	Pre vs In
MAP7	1:27632736-27633327	-0.111506	0.000139809	0.00537498	AltStart	In vs Post
MAP7	1:27745744-27745830	-0.102451	0.000656222	0.0171653	Cassette	In vs Post
MAP7	1:27679591-27679612	0.0226603	0.000678311	0.015161	AltStart	Pre vs Post
MAPK10	8:132687486-132687566	0.119637	5.52337e-09	9.13422e-07	AltStart	Pre vs In
MAPK10	8:132746838-132746857	-0.384615	1.33532e-06	0.000123694	A5SS	Pre vs In
MAPK10	8:132687486-132687566	-0.118148	1.62293e-08	2.86763e-06	AltStart	In vs Post
MAPK10	8:132681159-132681230	-0.0425555	0.00161458	0.0305955	Cassette	In vs Post
MAPK10	8:132632777-132632857	0.0210843	0.00133363	0.0239949	AltEnd	Pre vs Post
MARCH7	15:66695732-66695918	-0.18	0.00181517	0.0312244	Cassette	Pre vs In
MARCH7	15:66694958-66695006	0.0883978	1.48712e-09	3.30648e-07	Cassette_multi	In vs Post
MARCH7	15:66694958-66695006	0.0883978	1.28573e-08	1.97862e-06	Cassette_multi	Pre vs Post
MARK3	AEMK02000452.1:2051775-2051819	-0.579003	6.0268e-14	2.35447e-11	Cassette	Pre vs In
MARK3	AEMK02000452.1:2050601-2050627	-0.666667	2.19876e-12	6.97291e-10	Cassette	Pre vs In
MARK3	AEMK02000452.1:2050601-2050627	0.464286	5.37979e-06	0.000458714	Cassette	In vs Post
MARK3	AEMK02000452.1:2051775-2051819	0.272284	2.94267e-05	0.0017202	Cassette	In vs Post
MARK3	AEMK02000452.1:2051775-2051819	-0.306719	9.35365e-05	0.00357804	Cassette	Pre vs Post
MARK3	AEMK02000452.1:2050601-2050627	-0.202381	0.00277213	0.0379237	Cassette	Pre vs Post
MAST4	16:45539984-45540184	0.263158	0.000941676	0.0197386	Cassette	Pre vs In
MAST4	16:45383207-45383583	-0.0814341	0.000239266	0.00822978	AltStart	In vs Post
MAST4	16:45285636-45285671	-0.289044	0.00145993	0.0285549	Cassette	In vs Post
MAST4	16:45335275-45335321	0.29888	0.00172915	0.0319277	AltStart	In vs Post
MAST4	16:44985335-44986142	0.203762	0.00283343	0.044081	AltStart	In vs Post
MAST4	16:45383207-45383583	-0.115562	0.00248838	0.0352476	AltStart	Pre vs Post
MBNL2	11:66614184-66614278	-0.202623	8.05885e-06	0.000528553	Cassette	Pre vs In
MBNL2	11:66594891-66595091	0.0339797	0.0031344	0.046936	Cassette	In vs Post
MBNL2	11:66594891-66595091	0.037464	0.000261429	0.00770108	Cassette	Pre vs Post
MBNL2	11:66614184-66614278	-0.138331	0.0026955	0.0372433	Cassette	Pre vs Post
MED12	X:57158466-57158516	0.0252101	0.000249593	0.00766523	Cassette	Pre vs In
MED12	X:57158466-57158516	-0.0252101	0.0017879	0.032651	Cassette	In vs Post
MED12	X:57151376-57151456	0.0805369	4.96381e-06	0.000352562	AltStart	Pre vs Post
MED12L	13:91272525-91272724	-0.175439	3.56901e-05	0.00177175	AltStart	Pre vs In
MED12L	13:91272525-91272724	0.175439	0.000828908	0.0198897	AltStart	In vs Post
MED12L	13:91349179-91349259	-0.05	0.000849091	0.0200839	AltEnd	In vs Post
MED12L	13:91552626-91552681	-0.0661523	0.00389804	0.0475526	A3SS	Pre vs Post
MEST	18:18306971-18307051	-0.192827	4.47702e-06	0.000329734	AltEnd	Pre vs In
MEST	18:18306464-18307066	-0.0605444	0.0017314	0.0303063	AltEnd	Pre vs In
MEST	18:18306971-18307051	0.169138	8.30112e-12	2.63669e-09	AltEnd	In vs Post
MEST	18:18306464-18307066	0.132339	9.84044e-08	1.4192e-05	AltEnd	In vs Post
MEST	18:18307238-18307251	0.0897919	0.000239358	0.00822978	A3SS	In vs Post
MEST	18:18291103-18291109	-0.0293026	0.00222472	0.0377593	AltEnd	In vs Post
MEST	18:18302210-18302290	0.625	2.16043e-06	0.000175303	AltEnd	Pre vs Post
MEST	18:18331839-18333200	-0.0431942	3.28192e-05	0.00160658	A3SS	Pre vs Post
MEST	18:18307051-18307066	-0.155142	3.94869e-05	0.00186152	A3SS	Pre vs Post
MEST	18:18332295-18333200	0.0227273	4.45069e-05	0.0020477	AltEnd	Pre vs Post
MEST	18:18315930-18316195	0.00984975	0.00235821	0.0341698	A5SS	Pre vs Post
MFSD11	12:4799802-4799952	-0.107044	0.00206952	0.0340782	AltStart	Pre vs In
MFSD11	12:4794944-4794969	0.0806452	6.49798e-06	0.000530192	A3SS	In vs Post
MFSD11	12:4798943-4798998	-0.0267857	0.000652498	0.0171457	Cassette	In vs Post
MFSD11	12:4799802-4799952	0.131874	0.000743586	0.0186113	AltStart	In vs Post
MFSD11	12:4794944-4794969	0.0806452	4.50066e-05	0.00206409	A3SS	Pre vs Post
MGRN1	3:37707978-37708043	-0.196161	0.00055761	0.0133965	Cassette_multi	Pre vs In
MGRN1	3:37707978-37708043	0.393103	1.27807e-09	2.89158e-07	Cassette	In vs Post
MGRN1	3:37697475-37697519	-0.0718556	0.000323521	0.0103424	Cassette	In vs Post
MGRN1	3:37697475-37697519	-0.0522484	0.00331179	0.0426345	Cassette	Pre vs Post
MIGA1	6:135440960-135441078	-0.102902	4.63754e-10	9.39922e-08	Cassette	Pre vs In
MIGA1	6:135424895-135427477	-0.204068	6.93154e-05	0.00295176	AltEnd	Pre vs In
MIGA1	6:135512297-135512398	0.047619	0.000259301	0.00877972	AltStart	In vs Post
MIGA1	6:135440960-135441078	-0.102902	8.67086e-12	2.21124e-09	Cassette	Pre vs Post
MIGA1	6:135424895-135427477	-0.226011	1.36053e-11	3.37324e-09	AltEnd	Pre vs Post
MIGA1	6:135512297-135512398	0.0326797	0.00233212	0.0338814	AltStart	Pre vs Post
MINDY3	10:45997830-45998003	-0.218282	6.57399e-05	0.00284851	MXE	Pre vs In
MINDY3	10:46032662-46032742	-0.159091	0.00266759	0.0421896	AltEnd	In vs Post
MINDY3	10:45997830-45998003	-0.220836	2.3907e-05	0.00123583	MXE	Pre vs Post
MKLN1	18:17607824-17607904	0.0512343	0.000274693	0.00818191	AltStart	Pre vs In
MKLN1	18:17692399-17692562	0.411765	0.000522995	0.01455	Cassette	In vs Post
MKLN1	18:17509117-17509197	0.050262	0.000480268	0.0120639	AltEnd	Pre vs Post
MKLN1	18:17561988-17562038	0.525641	0.00135508	0.0242871	A5SS	Pre vs Post
MRPL48	9:8241632-8241720	0.0428187	0.00263048	0.0397462	Cassette	Pre vs In
MRPL48	9:8231998-8232009	0.714286	0.000257869	0.00875344	A5SS	In vs Post
MRPL48	9:8231998-8232009	0.857143	1.70629e-05	0.000951233	A5SS	Pre vs Post
MTIF2	3:85963861-85966091	0.310345	0.000638246	0.0148443	A3SS	Pre vs In
MTIF2	3:85995532-85995618	0.596154	0.00129495	0.0245131	Cassette	Pre vs In
MTIF2	3:85978718-85978820	-0.125	0.000438712	0.0127336	MXE	In vs Post
MTIF2	3:85963861-85963990	0.345832	8.75367e-09	1.42059e-06	Cassette	Pre vs Post
MTIF2	3:86410971-86411051	0.113557	0.000512449	0.0125658	AltStart	Pre vs Post
MTIF2	3:85966091-85966262	-0.0540136	0.00103927	0.020151	Cassette_multi	Pre vs Post
MTIF2	3:86292715-86292795	0.0666667	0.00316379	0.0414287	AltStart	Pre vs Post
MYEF2	1:123610049-123610056	0.449217	7.09423e-37	1.0624e-33	Cassette	Pre vs In
MYEF2	1:123608828-123608835	-0.57913	1.62291e-24	1.45824e-21	A5SS	Pre vs In
MYEF2	1:123610049-123610056	-0.283881	2.23673e-16	1.42091e-13	Cassette	In vs Post
MYEF2	1:123608828-123608835	0.29538	3.97864e-10	1.01033e-07	A5SS	In vs Post
MYEF2	1:123610049-123610056	0.165336	1.84119e-10	4.00826e-08	Cassette	Pre vs Post
MYEF2	1:123608828-123608835	-0.28375	2.95498e-08	4.23131e-06	A5SS	Pre vs Post
MYH14	6:55113605-55113685	0.026178	0.000154202	0.00531542	AltStart	Pre vs In
MYH14	6:55112683-55112763	-0.11503	0.000293406	0.00853189	AltStart	Pre vs In
MYH14	6:55127782-55127805	-0.0845009	0.00159959	0.0303763	Cassette	In vs Post
MYH14	6:55112683-55112763	-0.167353	2.60151e-06	0.000204283	AltStart	Pre vs Post
MYH14	6:55127782-55127805	-0.0796197	0.00347178	0.0439753	Cassette	Pre vs Post
MYO6	1:90054911-90054919	0.0541872	3.02881e-07	3.29212e-05	Cassette	Pre vs In
MYO6	1:90055545-90056716	0.0292683	0.000748788	0.0166813	A5SS	Pre vs In
MYO6	1:89999416-89999442	0.0586738	0.000104486	0.00429552	Cassette	In vs Post
MYO6	1:90054911-90054919	0.0541872	7.57787e-07	7.17006e-05	Cassette	Pre vs Post
MYO6	1:89999416-89999442	0.0465116	0.00123031	0.0225975	Cassette	Pre vs Post
MYRIP	13:24466369-24466449	-0.165152	0.000148671	0.00519117	AltStart	Pre vs In
MYRIP	13:24548357-24548417	0.233051	3.31454e-07	4.07536e-05	MXE	In vs Post
MYRIP	13:24548357-24548417	0.231481	7.63715e-07	7.17544e-05	MXE	Pre vs Post
MYRIP	13:24466369-24466449	-0.129675	0.000530195	0.0128596	AltStart	Pre vs Post
MYRIP	13:24536928-24536940	0.252319	0.00305642	0.0404956	A5SS	Pre vs Post
MYT1	17:62971896-62971909	-0.449275	5.18204e-05	0.00239895	A5SS	Pre vs In
MYT1	17:62999614-62999676	-0.0759494	0.000533794	0.0147894	Cassette_multi	In vs Post
MYT1	17:62971896-62971909	-0.33524	0.00253065	0.0356087	A5SS	Pre vs Post
NAA16	11:25563519-25563579	0.0769231	4.06397e-05	0.00197385	Cassette	Pre vs In
NAA16	11:25571873-25571899	-0.047619	0.000514511	0.0127826	MXE	Pre vs In
NAA16	11:25571873-25571899	0.184062	9.97762e-11	2.80224e-08	Cassette	In vs Post
NAA16	11:25571873-25571899	0.168078	6.66207e-07	6.41804e-05	Cassette	Pre vs Post
NAA16	11:25563519-25563579	0.0769231	1.43578e-05	0.000828578	Cassette	Pre vs Post
NEK1	14:20289072-20289107	0.0764295	4.58193e-06	0.000336541	Cassette	Pre vs In
NEK1	14:20259251-20259334	0.125517	0.00135523	0.0252695	Cassette	Pre vs In
NEK1	14:20214951-20215010	0.109501	0.00048317	0.0137729	Cassette	In vs Post
NEK1	14:20144723-20145074	0.0479955	0.00141444	0.0280794	IR	In vs Post
NEK1	14:20211633-20211713	0.106608	0.00307273	0.0463969	AltStart	In vs Post
NEK1	14:20289072-20289107	0.066092	0.000147416	0.00501923	Cassette	Pre vs Post
NEK1	14:20144723-20145074	0.0946785	0.000249225	0.00748149	IR	Pre vs Post
NEK1	14:20168415-20168428	0.1125	0.00127955	0.0232762	A3SS	Pre vs Post
NEK4	13:34883780-34883875	-0.0189359	0.00104423	0.0211482	A5SS	Pre vs In
NEK4	13:34880133-34880213	0.135962	2.47295e-05	0.00149535	AltEnd	In vs Post
NEK4	13:34870280-34870687	-0.0394089	0.00344121	0.0437927	Cassette	Pre vs Post
NELL2	5:75836815-75837399	0.0437624	0.00235716	0.0371143	AltStart	Pre vs In
NELL2	5:75798182-75798262	-0.0217352	0.000794809	0.0194553	AltStart	In vs Post
NELL2	5:75836815-75837399	0.133048	0.000249549	0.00748282	AltStart	Pre vs Post
NELL2	5:75798182-75798262	-0.0232525	0.00234912	0.0340565	AltStart	Pre vs Post
NFE2L1	12:24311304-24311393	0.111047	7.73014e-05	0.00317643	Cassette	Pre vs In
NFE2L1	12:24303806-24303918	0.10547	0.00287127	0.0421787	AltStart	Pre vs In
NFE2L1	12:24303806-24303918	-0.287436	1.02848e-16	6.69287e-14	AltStart	In vs Post
NFE2L1	12:24308982-24309062	-0.0362039	0.00194749	0.0344341	AltStart	In vs Post
NFE2L1	12:24303806-24303918	-0.181966	3.22751e-07	3.41496e-05	AltStart	Pre vs Post
NMNAT1	6:70300236-70300419	-0.142857	0.000193781	0.00632201	Cassette	Pre vs In
NMNAT1	6:70264128-70264209	-0.0704186	0.000334151	0.00934964	Cassette	Pre vs In
NMNAT1	6:70268255-70268363	0.0306122	0.00203506	0.033696	Cassette	Pre vs In
NMNAT1	6:70264128-70264209	-0.0336538	0.00175897	0.0322994	Cassette	In vs Post
NMNAT1	6:70268255-70268363	-0.0306122	0.00210122	0.0364405	Cassette	In vs Post
NMNAT1	6:70264128-70264209	-0.104072	2.93064e-09	5.129e-07	Cassette	Pre vs Post
NMNAT1	6:70300236-70300419	-0.142857	0.00135309	0.0242677	Cassette	Pre vs Post
NOP56	17:32959676-32959969	-0.0344768	0.0032559	0.0456639	A5SS	Pre vs In
NOP56	17:32962952-32962981	-0.0118208	0.000220522	0.00779304	A5SS	In vs Post
NOP56	17:32959676-32959969	-0.0639339	0.000257347	0.00763965	A5SS	Pre vs Post
NOP56	17:32964141-32964267	0.0657895	0.00181983	0.0289197	Cassette	Pre vs Post
NR5A1	1:265308928-265309008	0.28223	0.00029661	0.008588	AltStart	Pre vs In
NR5A1	1:265308532-265308612	0.0608263	0.000555657	0.0152056	AltStart	In vs Post
NR5A1	1:265308184-265308264	-0.019305	0.00267092	0.0370374	AltStart	Pre vs Post
NRCAM	9:108016664-108016693	-0.145581	5.56307e-06	0.000395668	Cassette	Pre vs In
NRCAM	9:108022366-108022492	-0.0484056	4.57782e-05	0.00216871	Cassette	Pre vs In
NRCAM	9:108003301-108003357	0.0772324	0.000690608	0.0157363	Cassette	Pre vs In
NRCAM	9:107973490-107973519	-0.0975078	0.000695089	0.0178324	Cassette	In vs Post
NRCAM	9:108022366-108022492	0.0438588	0.000798084	0.0194716	Cassette	In vs Post
NRCAM	9:108180753-108180891	-0.432331	0.00117467	0.0248297	MXE	In vs Post
NRCAM	9:107971947-107971974	0.0394416	0.0033684	0.0487641	A3SS	In vs Post
NRCAM	9:107971947-107971974	0.047332	0.000121951	0.00434819	A3SS	Pre vs Post
NRCAM	9:108016664-108016681	-0.0951594	0.00306646	0.0405685	Cassette	Pre vs Post
NRXN1	3:90322183-90322265	-0.0802581	2.94194e-05	0.00150866	Cassette	Pre vs In
NRXN1	3:90224447-90224468	0.18	0.000123561	0.00451317	A5SS	Pre vs In
NRXN1	3:90380537-90380563	-0.0288018	0.00327489	0.0458587	Cassette	Pre vs In
NRXN1	3:90224447-90224468	0.171875	6.61856e-06	0.000536747	A5SS	In vs Post
NRXN1	3:90224447-90224468	0.351875	1.06981e-19	6.22748e-17	A5SS	Pre vs Post
NRXN1	3:90322183-90322265	-0.0729602	4.64511e-05	0.00210461	Cassette	Pre vs Post
NRXN1	3:90380537-90380563	-0.0317393	0.00117113	0.0218531	Cassette	Pre vs Post
NT5C2	14:114074686-114074910	0.0551079	0.000298717	0.00863046	Cassette	Pre vs In
NT5C2	14:114126648-114126953	0.00279097	0.00297589	0.0431874	AltStart	Pre vs In
NT5C2	14:114193209-114193289	0.28413	0.0021996	0.0375721	Cassette	In vs Post
NT5C2	14:114074686-114074889	0.079989	0.000101308	0.00380468	Cassette	Pre vs Post
NT5C2	14:114193209-114193289	0.229018	0.00387547	0.047342	Cassette	Pre vs Post
NUDT14	AEMK02000452.1:3290039-3290117	-0.0578947	0.00034913	0.00966237	Cassette	Pre vs In
NUDT14	AEMK02000452.1:3290039-3290117	0.0578947	0.000101589	0.00421538	Cassette	In vs Post
NUDT14	AEMK02000452.1:3292435-3292454	-0.0472973	0.00137957	0.0245616	Cassette	Pre vs Post
ODF2L	4:129752290-129752371	0.162162	0.000288759	0.00844227	A3SS	Pre vs In
ODF2L	4:129755062-129755187	0.111111	0.000833064	0.0198988	Cassette	In vs Post
ODF2L	4:129735690-129735831	0.118236	0.00109142	0.0238104	Cassette	In vs Post
ODF2L	4:129721268-129721456	-0.040404	0.00166437	0.0311847	AltStart	In vs Post
ODF2L	4:129735690-129735831	0.129386	0.000314267	0.00885804	Cassette	Pre vs Post
ODF2L	4:129752290-129752371	0.125465	0.00134163	0.0240944	A3SS	Pre vs Post
ORC4	15:4144520-4144787	0.0879121	2.07339e-06	0.00017743	Cassette	Pre vs In
ORC4	15:4104314-4104410	0.146777	9.34309e-06	0.000595395	Cassette_multi	Pre vs In
ORC4	15:4150279-4152123	0.0139696	0.00324548	0.0456127	A5SS	Pre vs In
ORC4	15:4164516-4164606	0.231061	0.000368521	0.011186	MXE	In vs Post
ORC4	15:4160899-4160979	0.0456621	2.81186e-07	3.02382e-05	AltStart	Pre vs Post
ORC4	15:4144520-4144787	0.257143	0.00260717	0.0364546	Cassette	Pre vs Post
OXR1	4:30809825-30809865	-0.0482759	0.000260456	0.00789748	Cassette	Pre vs In
OXR1	4:30745846-30745926	0.121212	0.00012599	0.00492174	Cassette	In vs Post
OXR1	4:31222403-31222483	-0.142857	0.000109789	0.00404375	AltStart	Pre vs Post
OXR1	4:30745846-30745926	0.0946839	0.0013601	0.0243119	Cassette	Pre vs Post
PAIP1	16:28132942-28133045	0.0575682	0.00165626	0.0293725	Cassette	Pre vs In
PAIP1	16:28133562-28133956	0.0536874	0.000681739	0.0176347	AltStart	In vs Post
PAIP1	16:28133562-28133956	0.121056	5.25223e-06	0.000367203	AltStart	Pre vs Post
PAK3	X:91111452-91111459	0.05	0.000941338	0.0197386	A5SS	Pre vs In
PAK3	X:91114149-91114375	-0.16072	0.000105132	0.00430878	Cassette	In vs Post
PAK3	X:91112375-91112440	-0.135311	0.000540509	0.0149289	Cassette	In vs Post
PAK3	X:91113561-91113675	-0.0705212	0.000671423	0.0174433	Cassette_multi	In vs Post
PAK3	X:91112660-91112666	0.275689	0.00224586	0.0379973	Cassette	In vs Post
PAK3	X:91111452-91111459	-0.05	0.00246103	0.0403582	A5SS	In vs Post
PAK3	X:91114149-91114375	-0.240017	8.87326e-06	0.000565792	Cassette	Pre vs Post
PAK3	X:91112375-91112440	-0.144973	0.000167907	0.00555753	Cassette	Pre vs Post
PAK3	X:91113561-91113675	-0.0746756	0.00120387	0.0222602	Cassette_multi	Pre vs Post
PAM	2:108349365-108349445	-0.012894	0.00146248	0.0266999	AltStart	Pre vs In
PAM	2:108309201-108309228	0.15621	3.24006e-11	9.82363e-09	AltStart	In vs Post
PAM	2:108349365-108349445	0.00705741	0.00150217	0.0290881	AltStart	In vs Post
PAM	2:108309201-108309228	0.0927342	2.28522e-05	0.00119689	AltStart	Pre vs Post
PAPSS2	14:99750858-99750878	0.7	0.000252156	0.00771522	A5SS	Pre vs In
PAPSS2	14:99750798-99750878	-0.0591061	5.38126e-06	0.000458714	AltStart	In vs Post
PAPSS2	14:99754013-99754018	-0.0255102	0.000136981	0.0052968	AltStart	In vs Post
PAPSS2	14:99754013-99754018	-0.0257732	0.000413129	0.0107611	AltStart	Pre vs Post
PAPSS2	14:99755231-99755311	-0.03	0.00101053	0.0197944	AltStart	Pre vs Post
PATJ	6:150256174-150256297	-0.0756561	0.000521818	0.0128631	Cassette	Pre vs In
PATJ	6:150342486-150342578	-0.0337136	0.000901695	0.0191537	Cassette	Pre vs In
PATJ	6:150342486-150342578	0.0391246	0.000100474	0.00418215	Cassette	In vs Post
PATJ	6:150521470-150521489	-0.0757689	0.000755716	0.0188442	Cassette	In vs Post
PATJ	6:150497229-150497309	-0.0287024	0.00112637	0.02124	AltStart	Pre vs Post
PATJ	6:150256174-150256297	-0.0685828	0.00196918	0.0305673	Cassette	Pre vs Post
PCBD2	2:137096839-137096919	0.0186426	0.00345931	0.0476246	AltEnd	Pre vs In
PCBD2	2:137084139-137084219	0.025	0.000967431	0.021949	AltStart	In vs Post
PCBD2	2:137096839-137096919	0.0185949	0.00403978	0.0489028	AltEnd	Pre vs Post
PCDHAC2	2:142498314-142498333	-0.636364	3.04294e-05	0.00155058	MXE	Pre vs In
PCDHAC2	2:142519510-142519590	-0.0686008	9.18226e-05	0.00360812	AltStart	Pre vs In
PCDHAC2	2:142519510-142519590	0.0759253	0.000654049	0.0171457	AltStart	In vs Post
PCDHAC2	2:142525020-142525100	-0.0641026	0.000949566	0.0216727	AltStart	In vs Post
PCDHAC2	2:142652797-142652877	-0.0694444	0.00145795	0.0285396	AltStart	In vs Post
PCDHAC2	2:142517398-142517478	-0.0965961	0.000150409	0.00508522	AltStart	Pre vs Post
PCDHAC2	2:142495974-142496054	0.230769	0.000562408	0.013416	AltStart	Pre vs Post
PCDHAC2	2:142527282-142527404	0.188482	0.000769182	0.0164501	Cassette	Pre vs Post
PCDHAC2	2:142510165-142510254	0.251748	0.00171558	0.0279599	Cassette	Pre vs Post
PCDHAC2	2:142525020-142525100	-0.070543	0.00199832	0.0308055	AltStart	Pre vs Post
PCDHB15	2:142904032-142904112	-0.410256	0.00132027	0.0248355	AltStart	Pre vs In
PCDHB15	2:142904032-142904112	0.545455	2.04001e-05	0.0012807	AltStart	In vs Post
PCDHB15	2:142904311-142904391	0.342593	0.00106025	0.023379	AltStart	In vs Post
PCDHB15	2:142904311-142904391	0.28012	0.00205744	0.0313557	AltStart	Pre vs Post
PCDHGA9	2:143052769-143052849	-0.75	1.77731e-05	0.00100228	AltStart	Pre vs In
PCDHGA9	2:143052769-143052849	0.818182	6.68318e-06	0.000538713	AltStart	In vs Post
PCDHGA9	2:143048014-143048094	0.555556	0.00155813	0.0265561	AltStart	Pre vs Post
PCDHGC4	2:143039216-143039280	0.319728	6.43653e-05	0.00281204	Cassette	Pre vs In
PCDHGC4	2:142985264-142985344	0.282297	0.000399332	0.0106386	AltStart	Pre vs In
PCDHGC4	2:143028549-143028629	-0.196456	0.000884994	0.0189182	AltStart	Pre vs In
PCDHGC4	2:142985072-142985152	0.4	7.7796e-05	0.00351214	AltStart	In vs Post
PCDHGC4	2:143048375-143048439	-0.206061	0.0029438	0.0449849	MXE	In vs Post
PCDHGC4	2:143039216-143039280	-0.247046	0.00325019	0.0477523	Cassette	In vs Post
PCDHGC4	2:142979908-142979988	0.521739	0.00179688	0.0287942	AltStart	Pre vs Post
PCMTD2	17:63029374-63029418	0.287356	6.46979e-12	1.89565e-09	A5SS	Pre vs In
PCMTD2	17:63029374-63029418	-0.0842105	0.00189312	0.0338769	A5SS	In vs Post
PCMTD2	17:63029374-63029418	0.203146	6.21929e-06	0.000421605	A5SS	Pre vs Post
PEG10	9:74478314-74478373	-0.112106	1.38496e-05	0.000816915	Cassette	Pre vs In
PEG10	9:74485391-74485654	0.00401606	4.9917e-12	1.66479e-09	IR	In vs Post
PEG10	9:74485391-74485654	0.00401606	1.36838e-35	1.66551e-32	IR	Pre vs Post
PELI3	2:5956534-5956653	-0.514706	7.26955e-05	0.0030523	Cassette	Pre vs In
PELI3	2:5956534-5956653	0.381579	0.00320456	0.0475269	Cassette	In vs Post
PELI3	2:5958528-5958613	0.166667	0.000900843	0.018288	A3SS	Pre vs Post
PHB2	5:63755965-63755970	-0.474747	4.03056e-77	9.87707e-74	Cassette	Pre vs In
PHB2	5:63756131-63756136	0.324675	4.13135e-41	7.42431e-38	A3SS	Pre vs In
PHB2	5:63755965-63755970	-0.413253	6.01853e-49	2.29401e-45	Cassette	In vs Post
PHB2	5:63756131-63756136	0.485279	6.17662e-40	2.05998e-36	A3SS	In vs Post
PHB2	5:63755970-63756136	0.431193	2.24288e-07	2.86325e-05	IR	In vs Post
PHB2	5:63755965-63755970	-0.888	1.55805e-200	2.08599e-196	Cassette	Pre vs Post
PHB2	5:63756131-63756136	0.809955	9.76627e-135	8.71705e-131	A3SS	Pre vs Post
PIK3CB	13:79571064-79571122	-1	2.31283e-13	8.65897e-11	Cassette	Pre vs In
PIK3CB	13:79571064-79571122	0.294118	7.51788e-05	0.00344647	Cassette	In vs Post
PIK3CB	13:79571064-79571122	-0.705882	2.81539e-05	0.00143051	Cassette	Pre vs Post
PLAGL1	1:21327544-21327591	-0.0326087	0.000186899	0.00614397	Cassette	Pre vs In
PLAGL1	1:21320550-21320678	-0.347222	0.00282541	0.0416815	Cassette	Pre vs In
PLAGL1	1:21336959-21337097	0.131023	0.00183151	0.0331973	Cassette	In vs Post
PLAGL1	1:21327544-21327591	-0.0326087	0.000100872	0.00379363	Cassette	Pre vs Post
PLAGL1	1:21320550-21320678	-0.359477	0.000148692	0.0050463	Cassette	Pre vs Post
PLAGL1	1:21304468-21307526	-0.0469746	0.00207658	0.0315041	Cassette	Pre vs Post
PLCB4	17:18346513-18346593	0.0472973	0.000310514	0.00890448	AltStart	Pre vs In
PLCB4	17:18314577-18314612	-0.113492	0.00135373	0.0272887	Cassette	In vs Post
PLCB4	17:18314577-18314612	-0.140982	8.38433e-05	0.00327748	Cassette	Pre vs Post
PLCB4	17:18346513-18346593	0.0472973	0.00105132	0.0202608	AltStart	Pre vs Post
PLCB4	17:18278843-18278900	-0.0461394	0.00189202	0.0295755	Cassette	Pre vs Post
PLEKHA6	9:64898361-64898366	0.166667	0.0026157	0.0395451	Cassette	Pre vs In
PLEKHA6	9:64898361-64898366	0.416667	2.33339e-06	0.000222347	Cassette	In vs Post
PLEKHA6	9:64898361-64898366	0.583333	4.62594e-14	1.60868e-11	Cassette	Pre vs Post
PLEKHA6	9:64898300-64898306	-0.5	0.000137896	0.00477675	A3SS	Pre vs Post
PLXNB1	13:31129478-31129483	0.139785	4.35727e-07	4.58807e-05	A3SS	Pre vs In
PLXNB1	13:31120667-31120780	-0.042116	0.00339493	0.047172	Cassette	Pre vs In
PLXNB1	13:31119588-31119600	0.0598802	0.00205195	0.035783	A3SS	In vs Post
PLXNB1	13:31129478-31129483	0.252874	1.85269e-12	5.2776e-10	A3SS	Pre vs Post
PNPLA7	AEMK02000682.1:449210-449310	0.431438	0.000292921	0.00852697	Cassette	Pre vs In
PNPLA7	AEMK02000682.1:465025-465168	0.2	0.00048785	0.0138634	Cassette	In vs Post
PNPLA7	AEMK02000682.1:465028-465168	0.188406	0.00277449	0.0379237	Cassette	Pre vs Post
POMC	3:113667885-113667924	0.00722618	1.86891e-13	7.19692e-11	IR	Pre vs In
POMC	3:113667885-113667924	-0.0222045	0	0	IR	In vs Post
POMC	3:113668185-113668215	-1	2.22996e-11	6.93783e-09	A3SS	In vs Post
POMC	3:113667885-113667924	-0.0149783	0	0	IR	Pre vs Post
POSTN	11:13254089-13254155	0.063865	0.00200945	0.0334369	MXE	Pre vs In
POSTN	11:13231633-13231716	-0.0578866	0.00147444	0.0287149	Cassette	In vs Post
POSTN	11:13231633-13231716	-0.0590073	0.000987839	0.0194672	Cassette	Pre vs Post
POSTN	11:13254089-13254155	0.0624225	0.00176572	0.0284199	MXE	Pre vs Post
PPA2	8:116311992-116312072	0.0434447	6.98588e-05	0.00296553	AltEnd	Pre vs In
PPA2	8:116270402-116270446	0.0297872	0.000410645	0.0108058	Cassette	Pre vs In
PPA2	8:116311992-116312148	-0.0639506	8.1594e-06	0.000625577	Cassette	In vs Post
PPA2	8:116270402-116270446	0.0292887	0.000369527	0.00989483	Cassette	Pre vs Post
PPFIA1	2:3090152-3090178	0.352941	0.000191561	0.00627215	Cassette	Pre vs In
PPFIA1	2:3102181-3102210	-0.434397	2.95727e-09	5.9775e-07	Cassette	In vs Post
PPFIA1	2:3090152-3090178	-0.264706	0.00273979	0.0430159	Cassette	In vs Post
PPFIA1	2:3102181-3102210	-0.56535	3.48813e-12	9.53079e-10	Cassette	Pre vs Post
PPP3CC	14:6767785-6767899	0.18128	8.66621e-05	0.00348975	Cassette	Pre vs In
PPP3CC	14:6767785-6767899	-0.236908	6.41189e-08	9.72021e-06	Cassette	In vs Post
PPP3CC	14:6791993-6792022	0.0823826	9.52186e-05	0.00403396	Cassette	In vs Post
PPP3CC	14:6763062-6763201	-0.0344828	0.00149494	0.0258544	Cassette	Pre vs Post
PRL	7:17461271-17461280	0.541096	1.05685e-15	4.99797e-13	A3SS	Pre vs In
PRL	7:17451741-17451795	-0.581882	6.50577e-05	0.00282854	A3SS	Pre vs In
PRL	7:17461183-17461242	2.84666e-05	0.00145607	0.0285332	IR	In vs Post
PRL	7:17451705-17451741	0.641026	0.000118206	0.00426423	A3SS	Pre vs Post
PRL	7:17461183-17461242	9.22455e-06	0.00289942	0.0390545	IR	Pre vs Post
PTK2	4:2687316-2687398	-0.0704179	0.000632451	0.0147465	Cassette	Pre vs In
PTK2	4:2890079-2890087	0.0594059	0.00206932	0.0340782	Cassette	Pre vs In
PTK2	4:2880193-2880255	0.118376	5.05224e-05	0.00258731	Cassette	In vs Post
PTK2	4:2867405-2867542	-0.0860186	0.00301135	0.0401562	Cassette	Pre vs Post
PTK2	4:2890079-2890087	0.0594059	0.00367042	0.0454592	Cassette	Pre vs Post
PTPRK	1:35218568-35218603	-0.251708	2.12792e-11	5.67922e-09	Cassette	Pre vs In
PTPRK	1:35226145-35226162	0.019685	0.00124556	0.0258421	Cassette	In vs Post
PTPRK	1:35218568-35218603	-0.150915	8.1168e-05	0.00320094	Cassette	Pre vs Post
PTPRK	1:35209415-35209456	-0.0849288	0.00104472	0.0201935	Cassette	Pre vs Post
R3HDM1	15:16299461-16299511	-0.04	0.000447379	0.0115402	Cassette	Pre vs In
R3HDM1	15:16299461-16299511	0.0650407	1.35255e-05	0.000927112	Cassette	In vs Post
R3HDM1	15:16296389-16296457	0.123077	0.000152546	0.00581439	Cassette	In vs Post
R3HDM1	15:16272495-16272575	-0.173913	0.000526952	0.0127926	AltStart	Pre vs Post
RAB27A	1:116566490-116566705	-0.136986	5.03639e-05	0.00234071	MXE	Pre vs In
RAB27A	1:116533066-116533146	0.060324	0.000812379	0.0176601	AltStart	Pre vs In
RAB27A	1:116574759-116574940	-0.0948091	0.00304287	0.0460042	Cassette	In vs Post
RAB27A	1:116574759-116574940	-0.106298	0.0025236	0.035528	Cassette	Pre vs Post
RABEP1	12:51654802-51654962	-0.0256959	0.00193929	0.0326517	Cassette	Pre vs In
RABEP1	12:51661768-51661866	-0.0537815	0.00336249	0.0487536	Cassette	In vs Post
RABEP1	12:51661768-51661866	-0.0571429	0.00327879	0.0423727	Cassette	Pre vs Post
RALGAPA1	7:64233705-64233781	-0.065129	2.04448e-05	0.00110887	Cassette	Pre vs In
RALGAPA1	7:64233228-64233368	0.5	0.000225101	0.00708031	MXE	Pre vs In
RALGAPA1	7:64363626-64363656	0.205219	2.236e-06	0.0002146	Cassette	In vs Post
RALGAPA1	7:64363626-64363656	0.260891	8.43691e-10	1.63707e-07	Cassette	Pre vs Post
RALGAPA1	7:64233705-64233781	-0.0411951	0.00171912	0.0279757	Cassette	Pre vs Post
RALY	17:37470370-37470461	0.171066	0.00371036	0.0499121	Cassette_multi	Pre vs In
RALY	17:37468243-37468306	-0.384615	8.82953e-05	0.00384308	Cassette	In vs Post
RALY	17:37468243-37468306	-0.384615	0.000135783	0.00472189	Cassette	Pre vs Post
RALY	17:37470370-37470461	0.180822	0.00352897	0.0443431	Cassette_multi	Pre vs Post
RASAL2	9:120072012-120072092	-0.103588	0.00225158	0.0359377	AltStart	Pre vs In
RASAL2	9:120321767-120321797	-0.308333	6.531e-05	0.00309509	Cassette	In vs Post
RASAL2	9:120321767-120321797	-0.477778	1.82956e-10	4.00826e-08	Cassette	Pre vs Post
RASAL2	9:120072012-120072092	-0.0950384	0.000116978	0.00424432	AltStart	Pre vs Post
RBFOX2	5:11893010-11893041	-0.0276498	0.000630229	0.0147214	Cassette	Pre vs In
RBFOX2	5:11752664-11752875	-0.076087	0.00273375	0.0429813	AltStart	In vs Post
RBFOX2	5:11808730-11809415	0.256891	0.00375325	0.046207	AltStart	Pre vs Post
RFX1	2:65188326-65188406	0.451757	2.69906e-12	8.45997e-10	AltStart	Pre vs In
RFX1	2:65188326-65188406	-0.30282	0.000334694	0.0105306	AltStart	In vs Post
RFX1	2:65188326-65188406	0.148936	0.00257303	0.0360535	AltStart	Pre vs Post
RGP1	1:236468420-236468748	0.313514	6.35825e-05	0.00279142	IR	Pre vs In
RGP1	1:236469245-236469381	0.103712	0.000445424	0.0115204	Cassette	Pre vs In
RGP1	1:236468398-236468420	0.84507	8.21031e-16	4.86798e-13	A5SS	In vs Post
RGP1	1:236468420-236468748	-0.8	2.2536e-07	2.86325e-05	IR	In vs Post
RGP1	1:236469245-236469381	-0.10329	5.69113e-05	0.00280217	Cassette	In vs Post
RGP1	1:236468398-236468420	0.8	1.07515e-12	3.27152e-10	A5SS	Pre vs Post
RGP1	1:236468420-236468748	-0.486486	0.000810158	0.016942	IR	Pre vs Post
RIMS1	1:52137728-52137815	0.113732	6.79169e-05	0.00290138	Cassette	Pre vs In
RIMS1	1:52068750-52068830	0.197235	0.00203076	0.0336771	AltEnd	Pre vs In
RIMS1	1:52129112-52129294	0.295968	5.54695e-05	0.00275602	Cassette	In vs Post
RIMS1	1:52068750-52068836	-0.131313	0.00241502	0.0398486	Cassette	In vs Post
RIMS1	1:51866472-51866552	-0.212243	0.00252095	0.0407856	Cassette	In vs Post
RIMS1	1:52129112-52129294	0.352526	6.68053e-07	6.41804e-05	Cassette	Pre vs Post
RIMS1	1:52041946-52042236	-0.0324172	0.00363846	0.0452097	A5SS	Pre vs Post
RIMS2	4:33198295-33198327	-0.221666	9.30245e-07	9.11843e-05	Cassette_multi	Pre vs In
RIMS2	4:33252639-33252665	-0.045	2.82712e-06	0.000225047	Cassette	Pre vs In
RIMS2	4:33225919-33225984	-0.0695829	0.000488227	0.0122767	Cassette_multi	Pre vs In
RIMS2	4:33292877-33292944	-0.122471	0.00183919	0.0314976	Cassette	Pre vs In
RIMS2	4:33200132-33200311	0.15873	4.57448e-05	0.00240259	Cassette_multi	In vs Post
RIMS2	4:33292877-33292944	0.160666	8.20073e-05	0.00364066	MXE	In vs Post
RIMS2	4:33198295-33198327	0.156377	9.89931e-05	0.00413987	Cassette_multi	In vs Post
RIMS2	4:33200311-33200657	-0.103457	1.78213e-05	0.000987994	A3SS	Pre vs Post
RNF216	3:4294437-4294517	-0.0359712	0.00248282	0.0383976	AltEnd	Pre vs In
RNF216	3:4294437-4294517	0.0359712	0.00293304	0.0448461	AltEnd	In vs Post
RNF216	3:4308978-4308983	-0.0384615	0.00308872	0.0466121	A3SS	In vs Post
RNF216	3:4308978-4308983	-0.0384615	0.000579391	0.013669	A3SS	Pre vs Post
RPH3AL	12:47388653-47388717	0.222063	0.000538851	0.013117	AltStart	Pre vs In
RPH3AL	12:47391736-47391816	-0.118519	1.04034e-08	1.91429e-06	AltStart	In vs Post
RPH3AL	12:47391736-47391816	-0.116788	1.25981e-09	2.34264e-07	AltStart	Pre vs Post
RYR3	7:80917368-80917448	-0.138889	0.00141423	0.0261468	AltStart	Pre vs In
RYR3	7:80671639-80671720	-0.452206	0.00220581	0.0376059	Cassette	In vs Post
RYR3	7:80746667-80746959	-0.409091	2.52546e-05	0.00129301	A5SS	Pre vs Post
RYR3	7:80671639-80671720	-0.498039	0.000155006	0.00519472	Cassette	Pre vs Post
RYR3	7:80750146-80750227	0.37037	0.00329807	0.0425591	A5SS	Pre vs Post
SCG2	15:125422775-125422917	0.000342434	3.96418e-06	0.000298487	IR	Pre vs In
SCG2	15:125422232-125422288	0.00134672	2.99018e-08	4.92475e-06	IR	In vs Post
SCG2	15:125422232-125422288	0.00134672	3.96668e-05	0.00186671	IR	Pre vs Post
SEC16A	AEMK02000682.1:1289633-1289707	-0.116147	0.00345796	0.0476246	Cassette	Pre vs In
SEC16A	AEMK02000682.1:1262602-1262755	0.315547	0.000173247	0.00646489	AltStart	In vs Post
SEC16A	AEMK02000682.1:1262602-1262755	0.308858	0.00013355	0.00468073	AltStart	Pre vs Post
SEC24A	2:136939606-136939686	0.0390296	0.00252753	0.0387775	AltStart	Pre vs In
SEC24A	2:136939606-136939686	-0.0454955	0.000801058	0.0194832	AltStart	In vs Post
SEC24A	2:136949273-136952175	0.00606061	0.000311925	0.00880128	AltEnd	Pre vs Post
SEC24A	2:136946673-136952175	0.00717317	0.00079657	0.0167292	AltEnd	Pre vs Post
SEC31A	8:135478860-135478905	-0.409091	2.90675e-06	0.000230454	A5SS	Pre vs In
SEC31A	8:135492357-135492599	-0.0594796	0.000121941	0.00448284	A5SS	Pre vs In
SEC31A	8:135478860-135478905	0.154321	0.0011121	0.023987	A5SS	In vs Post
SEC31A	8:135478860-135478905	-0.25477	0.0030337	0.0403096	A5SS	Pre vs Post
SETD5	13:65810482-65810520	0.167302	1.98928e-06	0.000172978	Cassette	Pre vs In
SETD5	13:65842081-65842137	-0.0714286	0.0013403	0.0251369	Cassette	Pre vs In
SETD5	13:65810482-65810520	0.148461	0.00143395	0.0283084	Cassette	In vs Post
SETD5	13:65810482-65810520	0.315762	5.6382e-17	2.69597e-14	Cassette	Pre vs Post
SETD5	13:65808266-65808323	-0.183217	0.000253883	0.00756199	A3SS	Pre vs Post
SGCE	9:74416676-74416749	-0.0858668	0.000256586	0.00782412	Cassette	Pre vs In
SGCE	9:74457439-74457546	0.0707502	0.000108661	0.00442622	Cassette	In vs Post
SGCE	9:74417052-74417078	0.0583127	0.000621003	0.0142612	Cassette_multi	Pre vs Post
SGCE	9:74416676-74416749	-0.0561317	0.00241206	0.034542	Cassette	Pre vs Post
SGCE	9:74457439-74457546	0.0466908	0.00356881	0.0447388	Cassette	Pre vs Post
SLC25A25	1:268565737-268565817	-0.265375	0.000530693	0.0129813	AltStart	Pre vs In
SLC25A25	1:268569190-268569225	0.132565	0.00365267	0.0493333	Cassette	Pre vs In
SLC25A25	1:268569190-268569225	-0.123731	0.00129917	0.0266435	Cassette	In vs Post
SLC25A25	1:268565737-268565817	-0.319661	1.47022e-06	0.000126783	AltStart	Pre vs Post
SLC4A4	8:67876829-67876909	-0.238768	0.00115236	0.0226571	AltStart	Pre vs In
SLC4A4	8:67831508-67831615	0.428571	0.00134438	0.027215	AltStart	In vs Post
SLC4A4	8:67831508-67831615	0.403571	0.000267082	0.00782177	AltStart	Pre vs Post
SNAP91	1:82663563-82663826	-0.105769	0.000969773	0.0201551	Cassette	Pre vs In
SNAP91	1:82666509-82666592	-0.146154	0.00214398	0.0348782	Cassette	Pre vs In
SNAP91	1:82666592-82672296	-0.28	1.35517e-05	0.000927112	A5SS	In vs Post
SNAP91	1:82684949-82685029	-0.0415224	7.55568e-05	0.00344873	AltEnd	In vs Post
SNAP91	1:82664308-82664379	0.216853	0.000323672	0.0103424	Cassette	In vs Post
SNAP91	1:82684949-82685029	-0.0452261	3.67828e-07	3.81757e-05	AltEnd	Pre vs Post
SNAP91	1:82541831-82541975	0.0858896	3.05567e-06	0.00023255	AltStart	Pre vs Post
SNCA	8:129249770-129249912	0.171154	0.00230932	0.0366177	AltStart	Pre vs In
SNCA	8:129248930-129249286	-0.256705	0.00104797	0.0231272	A5SS	In vs Post
SNCA	8:129249770-129249912	0.229322	7.61619e-06	0.000498628	AltStart	Pre vs Post
SORBS2	15:46636139-46636297	1	2.51032e-09	4.42276e-07	MXE	Pre vs In
SORBS2	15:46633434-46633490	0.0856045	0.000713749	0.0160734	Cassette_multi	Pre vs In
SORBS2	15:46755216-46755296	-0.0224033	0.00196028	0.0329109	AltEnd	Pre vs In
SORBS2	15:46727363-46727479	-0.0862118	8.6458e-07	9.37718e-05	Cassette	In vs Post
SORBS2	15:46635371-46635454	0.483709	7.92616e-05	0.0035554	Cassette	In vs Post
SORBS2	15:46562827-46562907	-0.752381	0.000102129	0.00423122	AltEnd	In vs Post
SORBS2	15:46636139-46636297	-0.6	0.00134054	0.0271785	MXE	In vs Post
SORBS2	15:46654141-46654424	-0.32	0.00155396	0.0297511	A5SS	In vs Post
SORBS2	15:46673715-46673784	-0.0856202	0.00239592	0.0396599	A3SS	In vs Post
SORBS2	15:46636139-46636297	0.4	0.000692394	0.0153352	MXE	Pre vs Post
SORBS2	15:46727363-46727479	-0.0673058	0.00073687	0.0159657	Cassette	Pre vs Post
SORBS2	15:46673715-46673784	-0.104758	0.000906734	0.0183538	A3SS	Pre vs Post
SOX5	5:49749765-49749815	0.25641	9.54741e-05	0.00372446	Cassette	Pre vs In
SOX5	5:49749765-49749815	-0.607059	2.29306e-11	7.03233e-09	Cassette_multi	In vs Post
SOX5	5:49749765-49749815	-0.390649	8.8745e-06	0.000565792	Cassette	Pre vs Post
SOX5	5:49531506-49531586	-0.109032	0.000749323	0.0161486	AltEnd	Pre vs Post
SPOCK2	14:74940241-74940278	0.213117	7.97527e-06	0.000525627	IR	Pre vs In
SPOCK2	14:74942273-74942300	-0.025	0.00339261	0.0489818	A3SS	In vs Post
SPOCK2	14:74940241-74940278	0.26566	4.73412e-07	4.81998e-05	IR	Pre vs Post
SPOCK2	14:74942273-74942300	-0.025	0.00181535	0.0288857	A3SS	Pre vs Post
SRRM1	6:82332791-82332832	-0.263889	8.84727e-05	0.00354081	Cassette	Pre vs In
SRRM1	6:82321446-82321483	-0.147674	0.000145687	0.00513817	Cassette	Pre vs In
SRRM1	6:82321446-82321483	0.187148	6.68593e-09	1.2742e-06	Cassette	In vs Post
SRRM1	6:82332791-82332832	-0.327381	1.06407e-05	0.000655	Cassette	Pre vs Post
SRSF7	3:101605604-101605710	0.130657	0.000296113	0.00858281	Cassette	Pre vs In
SRSF7	3:101606540-101606564	0.0940171	1.05336e-05	0.00075754	A5SS	In vs Post
SRSF7	3:101606540-101606564	0.0830281	0.0019659	0.0305519	A5SS	Pre vs Post
STAU1	17:50884138-50884290	0.300481	0.00109474	0.0219079	Cassette	Pre vs In
STAU1	17:50849730-50849854	0.411765	8.4817e-05	0.00373433	MXE	In vs Post
STAU1	17:50884138-50884290	-0.28125	0.000805896	0.0195005	Cassette	In vs Post
STAU1	17:50849730-50849854	0.411765	0.000755896	0.0162315	MXE	Pre vs Post
STK10	16:52126741-52126783	0.285714	0.000256973	0.00782709	A5SS	Pre vs In
STK10	16:52128612-52128736	-0.131148	0.00224668	0.0359317	Cassette_multi	Pre vs In
STK10	16:52222202-52222365	-0.298683	6.91666e-05	0.00324329	Cassette	In vs Post
STK10	16:52133356-52133410	-0.302139	0.00156267	0.0298289	A5SS	In vs Post
STK10	16:52134167-52134293	-0.203591	0.00159024	0.0302203	Cassette_multi	In vs Post
STK10	16:52222202-52222365	-0.266026	8.32238e-06	0.000539585	Cassette	Pre vs Post
STX16	17:58848689-58848700	0.290909	0.00249124	0.0383983	Cassette	Pre vs In
STX16	17:58848689-58848700	-0.349412	3.55387e-05	0.00197956	Cassette	In vs Post
STX16	17:58875856-58875936	0.285714	0.000468208	0.0118275	AltStart	Pre vs Post
SYBU	4:27927275-27927334	0.14882	2.28414e-09	4.10476e-07	Cassette	Pre vs In
SYBU	4:27928709-27928789	-0.0287081	0.000848556	0.0200839	AltStart	In vs Post
SYBU	4:27927275-27927334	0.0823231	0.000556769	0.0133067	Cassette	Pre vs Post
SYNE2	1:194264179-194264259	0.0190058	0.00171483	0.0301335	AltStart	Pre vs In
SYNE2	1:193923706-193923774	-0.145326	2.92741e-06	0.000267487	Cassette	In vs Post
SYNE2	1:193923706-193923774	-0.15548	7.73111e-07	7.21466e-05	Cassette	Pre vs Post
SYT7	2:9963914-9963994	-0.125407	0.000526962	0.0129428	AltStart	Pre vs In
SYT7	2:10010735-10010789	0.632254	8.85854e-09	1.65283e-06	IR	In vs Post
SYT7	2:9963914-9963994	0.141667	0.00015449	0.00588011	AltStart	In vs Post
SYT7	2:10010735-10010789	0.357895	8.41216e-07	7.76733e-05	IR	Pre vs Post
TBC1D8	3:53271186-53271266	0.0753791	0.000782961	0.0172009	AltEnd	Pre vs In
TBC1D8	3:53286446-53286535	0.0269231	0.00168547	0.0314255	Cassette	In vs Post
TBC1D8	3:53270926-53271158	0.101695	0.000717465	0.0157086	A5SS	Pre vs Post
TBC1D8	3:53286446-53286535	0.0269231	0.00344591	0.0437927	Cassette	Pre vs Post
TBL1XR1	13:115443010-115443108	-0.146738	1.30282e-05	0.00077354	Cassette	Pre vs In
TBL1XR1	13:115402314-115402388	0.0326743	0.000423839	0.0110815	Cassette_multi	Pre vs In
TBL1XR1	13:115380561-115380641	-0.0301724	0.00100899	0.0206676	AltEnd	Pre vs In
TBL1XR1	13:115487136-115487284	-0.0651486	0.000342023	0.0106234	AltStart	In vs Post
TBL1XR1	13:115443010-115443108	-0.106551	0.000388761	0.0102864	Cassette	Pre vs Post
TBL1XR1	13:115487136-115487217	-0.0597188	0.000588482	0.0137714	AltStart	Pre vs Post
TBL1XR1	13:115402314-115402388	0.0321731	0.000637644	0.0145312	Cassette_multi	Pre vs Post
TCF25	6:199120-199125	0.0535987	0.00011675	0.00434684	A3SS	Pre vs In
TCF25	6:199120-199125	-0.0658436	6.15403e-08	9.54627e-06	A3SS	In vs Post
TCF25	6:186534-186576	0.117704	0.00109684	0.0238701	A5SS	In vs Post
TCF25	6:186534-186576	0.171382	1.80215e-06	0.000150331	A5SS	Pre vs Post
TCF4	1:104726304-104726348	0.0480736	0.000273622	0.00818191	Cassette	Pre vs In
TCF4	1:105075866-105075942	-0.128666	0.00143827	0.0283306	AltStart	In vs Post
TCF4	1:105075779-105075827	0.0955964	0.000535107	0.0129319	Cassette	Pre vs Post
TCF4	1:105075866-105075942	-0.117199	0.0024519	0.0349226	AltStart	Pre vs Post
TENM3	15:44345663-44345683	-0.274603	1.8925e-12	6.1463e-10	Cassette	Pre vs In
TENM3	15:44315002-44315028	-0.118777	2.33806e-06	0.000195729	Cassette_multi	Pre vs In
TENM3	15:44316603-44316623	0.52795	3.93394e-06	0.00029704	Cassette	Pre vs In
TENM3	15:44345663-44345683	0.216681	7.10919e-08	1.05967e-05	Cassette	In vs Post
TENM3	15:44315002-44315028	-0.142445	1.94949e-07	2.23084e-05	Cassette_multi	Pre vs Post
TENM3	15:44316603-44316623	0.491429	1.50599e-05	0.000859826	Cassette	Pre vs Post
TENM3	15:42723527-42723607	0.185049	0.000733248	0.0159239	AltStart	Pre vs Post
TIMM29	2:69648808-69648888	-0.0513831	0.000954493	0.0199298	AltStart	Pre vs In
TIMM29	2:69648808-69648888	0.125655	2.83935e-10	7.57566e-08	AltStart	In vs Post
TIMM29	2:69648808-69648888	0.074272	0.000822385	0.0170971	AltStart	Pre vs Post
TLN1	1:236419118-236419172	0.076799	1.06341e-06	0.000102011	A5SS	Pre vs In
TLN1	1:236419118-236419172	-0.0685128	0.000132245	0.00513598	A5SS	In vs Post
TLN1	1:236451055-236451167	-0.0364093	0.00173462	0.0281503	A3SS	Pre vs Post
TMEM141	AEMK02000682.1:1020941-1021007	-0.106383	0.000116117	0.00432924	MXE	Pre vs In
TMEM141	AEMK02000682.1:1020308-1020415	0.0314465	0.00111762	0.0222103	Cassette_multi	Pre vs In
TMEM141	AEMK02000682.1:1020941-1021007	0.106383	0.000717299	0.0181405	MXE	In vs Post
TMEM141	AEMK02000682.1:1020941-1021007	0.0909091	0.00141763	0.0249658	MXE	Pre vs Post
TMEM159	3:24908099-24908295	0.777778	0.000251098	0.00769158	MXE	Pre vs In
TMEM159	3:24901389-24901557	-0.0460526	0.00242083	0.0377421	Cassette	Pre vs In
TMEM159	3:24908427-24908455	0.0916667	4.12133e-05	0.00221696	Cassette	In vs Post
TMEM159	3:24908099-24908295	0.777778	9.43098e-06	0.000594196	MXE	Pre vs Post
TMEM237	15:105275705-105275807	0.136364	0.00237497	0.0372849	AltStart	Pre vs In
TMEM237	15:105273813-105273823	0.633333	0.0012349	0.0257208	Cassette	In vs Post
TMEM237	15:105273813-105273823	0.733333	2.10736e-06	0.000171516	Cassette	Pre vs Post
TMEM50B	13:197087555-197087675	-0.231132	5.46208e-06	0.000390546	MXE	Pre vs In
TMEM50B	13:197087555-197087675	0.0992727	8.06231e-05	0.00359402	Cassette	In vs Post
TMEM50B	13:197082492-197082587	-0.226566	0.00166958	0.0312603	Cassette_multi	In vs Post
TMEM50B	13:197087555-197087675	-0.21	0.00204372	0.0312355	MXE	Pre vs Post
TOM1L2	12:60719454-60719516	-1	5.04221e-09	8.4421e-07	MXE	Pre vs In
TOM1L2	12:60723827-60723886	0.411285	1.63693e-10	4.50257e-08	Cassette_multi	In vs Post
TOM1L2	12:60719454-60719516	0.342857	0.00135416	0.0272887	Cassette	In vs Post
TOM1L2	12:60723827-60723886	0.504545	1.69608e-16	7.20887e-14	Cassette_multi	Pre vs Post
TOM1L2	12:60727390-60727565	-0.218924	0.00308838	0.0407578	IR	Pre vs Post
TPCN1	14:38677067-38678328	0.368056	6.62244e-05	0.00285485	A3SS	Pre vs In
TPCN1	14:38764305-38764335	-0.567251	8.7509e-06	0.000665193	Cassette	In vs Post
TPCN1	14:38764305-38764335	-0.393162	0.00100515	0.0197196	Cassette	Pre vs Post
TPD52L1	1:37678161-37678175	-0.382353	6.85021e-08	8.86386e-06	Cassette	Pre vs In
TPD52L1	1:37678161-37678175	0.382353	0.000414216	0.0122253	Cassette	In vs Post
TPD52L1	1:37671437-37671518	-0.0899059	0.000886135	0.018107	Cassette	Pre vs Post
TPM1	1:108998047-108998122	0.200614	3.1338e-13	1.15719e-10	Cassette	Pre vs In
TPM1	1:108998047-108998122	-0.239711	3.02893e-24	4.25341e-21	Cassette	In vs Post
TPM1	1:109014880-109015005	0.480432	3.66487e-09	7.24314e-07	MXE	In vs Post
TPM1	1:109010328-109010548	-0.158843	6.85718e-05	0.00323245	AltStart	In vs Post
TPM1	1:109014880-109015005	0.717061	1.76591e-12	5.08449e-10	Cassette	Pre vs Post
TPM1	1:108998047-108998122	-0.0506574	0.000955888	0.0190729	MXE	Pre vs Post
TRAK1	13:25833379-25833397	0.628241	6.57935e-15	2.86053e-12	AltStart	Pre vs In
TRAK1	13:25864427-25864507	-0.0292398	0.00236561	0.0372145	AltEnd	Pre vs In
TRAK1	13:25833379-25833397	-0.283294	8.62826e-06	0.000657744	AltStart	In vs Post
TRAK1	13:25833379-25833397	0.344947	6.12835e-05	0.00256404	AltStart	Pre vs Post
TRAPPC9	4:3094841-3094867	0.212015	0.000138479	0.00493109	Cassette	Pre vs In
TRAPPC9	4:3094841-3094867	-0.455822	8.63708e-14	3.60072e-11	Cassette	In vs Post
TRAPPC9	4:3094841-3094867	-0.243807	1.25687e-05	0.000746237	Cassette	Pre vs Post
TRIQK	4:43717522-43717562	-0.0754242	0.000426464	0.0111393	Cassette	Pre vs In
TRIQK	4:43786104-43786189	0.0210526	0.00318768	0.0473555	Cassette	In vs Post
TRIQK	4:43717558-43717566	-0.363636	0.000772262	0.0164603	A5SS	Pre vs Post
TRPC1	13:83482367-83482486	0.232825	4.80024e-07	4.95767e-05	Cassette	Pre vs In
TRPC1	13:83482367-83482486	-0.165412	3.12639e-05	0.00178619	Cassette	In vs Post
TRPC1	13:83453413-83453495	-0.217121	0.00277121	0.0379237	Cassette_multi	Pre vs Post
TRUB2	1:268756225-268756272	-0.538462	0.000106077	0.00404445	A5SS	Pre vs In
TRUB2	1:268746515-268746550	-0.0737705	0.00253403	0.038833	IR	Pre vs In
TRUB2	1:268746515-268746550	0.283465	1.73098e-08	3.01858e-06	IR	In vs Post
TRUB2	1:268752223-268752284	-0.111111	0.00210868	0.0365336	Cassette	In vs Post
TRUB2	1:268759578-268760498	-0.037037	0.00338765	0.0489366	A3SS	In vs Post
TRUB2	1:268752223-268752284	-0.112626	0.00209983	0.0316951	Cassette	Pre vs Post
UBA6	8:65476811-65476867	0.10539	1.00117e-05	0.000627616	A5SS	Pre vs In
UBA6	8:65475884-65475917	0.0433333	2.17019e-05	0.00116368	A3SS	Pre vs In
UBA6	8:65485465-65485580	0.128773	0.000126351	0.00458402	MXE	Pre vs In
UBA6	8:65485465-65485580	-0.142857	6.97779e-05	0.00325737	MXE	In vs Post
UBA6	8:65421626-65421696	-0.875	1.04648e-06	9.34056e-05	MXE	Pre vs Post
UBA6	8:65469367-65469998	-0.00707145	1.9039e-05	0.00103646	IR	Pre vs Post
UBA6	8:65469037-65469467	-0.00729707	0.00120094	0.0222602	Cassette_multi	Pre vs Post
UBA6	8:65470583-65470645	-0.000955338	0.00294538	0.039454	A3SS	Pre vs Post
UBAP2L	4:95524751-95524868	-0.0259743	0.000867677	0.0186471	Cassette	Pre vs In
UBAP2L	4:95519630-95519695	-0.00813008	0.00248612	0.040595	A5SS	In vs Post
UBAP2L	4:95519270-95519350	-0.235294	2.03819e-06	0.000166392	AltStart	Pre vs Post
UBAP2L	4:95519630-95519695	-0.070922	0.00129926	0.0235484	A5SS	Pre vs Post
UBE3A	1:141984591-141984711	-0.162789	1.33421e-12	4.38597e-10	AltEnd	Pre vs In
UBE3A	1:141926264-141926355	-0.18156	6.85625e-05	0.00292432	Cassette	Pre vs In
UBE3A	1:141899847-141899927	-0.047619	0.000430311	0.0125889	AltStart	In vs Post
UBE3A	1:141984591-141984711	-0.146522	1.5626e-06	0.000133723	AltEnd	Pre vs Post
UBE3A	1:141926264-141926355	-0.165675	0.000182724	0.0059235	Cassette	Pre vs Post
UBR5	4:34782645-34782651	-0.0462362	0.00191882	0.0325101	A5SS	Pre vs In
UBR5	4:34742500-34742551	-0.0863125	0.0024928	0.0383983	A3SS	Pre vs In
UBR5	4:34785673-34785757	-0.0203046	0.00113816	0.0242939	Cassette	In vs Post
UBR5	4:34774630-34774636	0.0207612	0.00240875	0.0397738	A5SS	In vs Post
UBR5	4:34771380-34771422	0.0295203	0.00148692	0.0258038	A3SS	Pre vs Post
UBR5	4:34782645-34782651	-0.0421662	0.00186039	0.0292864	A5SS	Pre vs Post
UBTF	12:18992016-18992032	0.134655	0.000149857	0.00521231	AltStart	Pre vs In
UBTF	12:18992432-18992512	-0.026455	0.000982608	0.0203748	AltStart	Pre vs In
UBTF	12:18990577-18990717	-0.10095	0.00310071	0.046662	AltStart	In vs Post
UBTF	12:18990577-18990717	-0.176353	5.51006e-06	0.000382236	AltStart	Pre vs Post
UBTF	12:18992016-18992032	0.173238	6.28927e-06	0.000425272	AltStart	Pre vs Post
UBTF	12:18995232-18995325	0.0310559	0.00409576	0.0493574	Cassette	Pre vs Post
UGGT1	15:59255090-59255157	0.109561	1.37041e-08	2.12303e-06	Cassette	Pre vs In
UGGT1	15:59193649-59193672	-0.0227447	0.00143984	0.0283306	Cassette	In vs Post
UGGT1	15:59255090-59255157	0.0820028	0.000160537	0.00534663	Cassette	Pre vs Post
WDR17	15:38669996-38670151	0.0804598	3.67986e-05	0.00181611	Cassette	Pre vs In
WDR17	15:38680657-38680677	-0.161791	0.00236262	0.0392754	Cassette	In vs Post
WDR17	15:38680657-38680677	-0.320393	7.39143e-09	1.22173e-06	Cassette	Pre vs Post
WDR17	15:38669996-38670151	0.0506329	0.00111673	0.0211475	Cassette	Pre vs Post
WDR41	2:86355098-86355153	-0.143762	2.55063e-06	0.000209618	Cassette	Pre vs In
WDR41	2:86356559-86356670	0.0263158	0.000550266	0.0151201	Cassette	In vs Post
WDR41	2:86333824-86333877	-0.05	0.00116164	0.0245981	Cassette	In vs Post
WDR41	2:86339431-86339476	0.224359	9.82357e-05	0.00371104	A3SS	Pre vs Post
WDR41	2:86333824-86333877	-0.05	0.000792428	0.0166705	Cassette	Pre vs Post
WDR41	2:86355098-86355153	-0.0956848	0.001273	0.0232042	Cassette	Pre vs Post
WDR6	13:31639113-31639198	0.118482	1.73058e-05	0.000982093	Cassette	Pre vs In
WDR6	13:31660310-31660381	0.0400711	0.00264802	0.0419636	Cassette	In vs Post
WDR6	13:31649789-31649805	0.0281808	0.00298641	0.0455577	A3SS	In vs Post
WDR6	13:31639113-31639198	0.115805	1.71426e-05	0.000952338	Cassette	Pre vs Post
YIPF2	2:69782732-69782830	0.322937	1.58179e-08	2.39543e-06	Cassette	Pre vs In
YIPF2	2:69782732-69782830	0.186205	0.000602091	0.0162103	Cassette	In vs Post
YIPF2	2:69648731-69648888	0.0420137	0.00060567	0.0162902	Cassette	In vs Post
YIPF2	2:69782732-69782830	0.509142	9.82276e-19	5.15733e-16	Cassette	Pre vs Post
ZNF207	12:42585684-42585902	-0.0109745	0.00361913	0.0489499	IR	Pre vs In
ZNF207	12:42588427-42588519	0.0752836	0.00313725	0.046936	Cassette	In vs Post
ZNF207	12:42588427-42588519	0.0794629	0.001306	0.0236077	Cassette	Pre vs Post
ZNF239	14:92197733-92197807	0.132966	0.000402655	0.0106936	Cassette	Pre vs In
ZNF239	14:92197562-92197656	-0.0215827	0.00176444	0.0323553	Cassette_multi	In vs Post
ZNF239	14:92190415-92190614	0.0521951	0.00323252	0.0476358	A5SS	In vs Post
ZNF239	14:92197733-92197807	0.149872	2.41784e-05	0.00124745	Cassette	Pre vs Post
ZNF639	13:117371760-117371840	-0.0833333	0.00308157	0.0439973	AltStart	Pre vs In
ZNF639	13:117370726-117370931	-0.178139	4.94699e-05	0.00255301	AltStart	In vs Post
ZNF639	13:117370851-117370931	-0.35	6.18479e-11	1.42767e-08	AltStart	Pre vs Post
ZNF644	4:125741643-125741790	0.147059	0.000118966	0.00440503	MXE	Pre vs In
ZNF644	4:125780952-125781108	0.15388	0.00100403	0.0206515	Cassette	Pre vs In
ZNF644	4:125824968-125825000	-0.0324708	0.000355426	0.0109252	Cassette	In vs Post
ZNF644	4:125779002-125779082	-0.0542636	0.00119371	0.0221664	AltStart	Pre vs Post

## Sheet: Table S5
Table S5. The DSGs of staged differentially AS in ovary
DSGs	Location	delta_PSI	P-Value	FDR	DEAS events	Group
ABCG2	8:130917846-130917926	0.0871731	0.000401611	0.0135405	AltStart	Pre vs In
ABCG2	8:130918250-130918406	0.0964852	0.000920514	0.0252671	A3SS	Pre vs In
ABCG2	8:130905300-130905380	-0.144239	9.25125e-09	5.69928e-07	AltStart	In vs Post
ABCG2	8:130852959-130853039	-0.289875	0.000114127	0.00225588	AltStart	In vs Post
ABCG2	8:130955547-130955627	0.132858	0.000176775	0.00321091	AltEnd	In vs Post
ABCG2	8:130886882-130886962	-0.237335	0.000718587	0.0100232	AltEnd	In vs Post
ABCG2	8:130852786-130853039	-0.435645	5.3278e-12	4.68741e-10	AltStart	Pre vs Post
ABCG2	8:130918250-130918406	0.0964852	1.29966e-07	4.04103e-06	A3SS	Pre vs Post
ABCG2	8:130905300-130905380	-0.0811763	8.54727e-05	0.00102895	AltStart	Pre vs Post
ABCG2	8:130917846-130917926	0.0871731	0.000133403	0.00148101	AltStart	Pre vs Post
ABCG2	8:130955547-130955627	0.120971	0.000754077	0.00592481	AltEnd	Pre vs Post
ABCG2	8:130855902-130856202	0.0557564	0.00079226	0.00617166	AltStart	Pre vs Post
ABCG2	8:130886882-130886962	-0.186329	0.00745317	0.0347799	AltEnd	Pre vs Post
ABI3BP	13:158173741-158173806	-0.215686	0.000553459	0.0172461	Cassette	Pre vs In
ABI3BP	13:158178997-158179077	-0.542781	0.00172964	0.0387242	AltEnd	Pre vs In
ABI3BP	13:158178645-158178719	0.55	8.83041e-05	0.00182517	Cassette	In vs Post
ABI3BP	13:158173741-158173806	0.253565	0.000529788	0.00786981	Cassette	In vs Post
ABI3BP	13:158178645-158178719	0.398077	0.000537147	0.00455654	Cassette	Pre vs Post
ACSF2	12:26756589-26756669	0.846053	5.52831e-07	5.73931e-05	AltEnd	Pre vs In
ACSF2	12:26752205-26756507	0.14232	0.000667173	0.0196507	AltEnd	Pre vs In
ACSF2	12:26738940-26738982	0.0663542	2.10102e-06	7.39625e-05	Cassette	In vs Post
ACSF2	12:26742530-26742677	0.0311623	0.000265143	0.00448197	Cassette	In vs Post
ACSF2	12:26756589-26756669	0.935417	3.92573e-10	2.26968e-08	AltEnd	Pre vs Post
ACSF2	12:26738940-26738982	0.0830059	4.23026e-07	1.13447e-05	Cassette	Pre vs Post
ACSF2	12:26742530-26743368	0.0465352	7.02736e-06	0.000125741	Cassette	Pre vs Post
ACSF2	12:26752205-26756507	0.188906	1.9449e-05	0.000302526	AltEnd	Pre vs Post
ACTB	3:4087350-4087494	0.186685	0	0	IR	Pre vs In
ACTB	3:4087494-4087524	-0.940464	7.92315e-73	8.30781e-69	Cassette	Pre vs In
ACTB	3:4087464-4087485	0.0853659	7.63979e-15	3.02291e-12	Cassette	Pre vs In
ACTB	3:4076083-4076163	-0.57101	9.48756e-13	2.96961e-10	AltEnd	Pre vs In
ACTB	3:4087332-4087461	-0.646465	1.31229e-09	2.39304e-07	A3SS	Pre vs In
ACTB	3:4072646-4076158	-0.46824	1.49446e-05	0.000964316	AltEnd	Pre vs In
ACTB	3:4084278-4086374	0.00699301	0.000240509	0.00897458	AltEnd	Pre vs In
ACTB	3:4087350-4087494	-0.0955266	4.87695e-13	5.90169e-11	IR	In vs Post
ACTB	3:4087494-4087524	0.0992847	3.35762e-07	1.46297e-05	Cassette	In vs Post
ACTB	3:4076080-4076160	-0.997276	3.29261e-89	1.4658e-85	AltEnd	Pre vs Post
ACTB	3:4087353-4087464	0.0137892	3.04071e-25	1.16695e-22	IR	Pre vs Post
ACTB	3:4076981-4077061	-0.375619	6.2511e-20	1.43447e-17	AltEnd	Pre vs Post
ADAMTS6	16:44019088-44019168	205::74	-0.125804	0.00086122	0.0240809	AltStart
ADAMTS6	16:44019088-44019168	-0.0833333	0.00306433	0.0311747	AltStart	In vs Post
ADAMTS6	16:44019088-44019168	-0.209138	1.61791e-09	8.12935e-08	AltStart	Pre vs Post
ADAMTS6	16:43837794-43837930	0.222232	0.000594074	0.00492138	Cassette	Pre vs Post
ADAMTS9	13:46075810-46075828	-0.370742	2.43111e-06	0.000203118	A3SS	Pre vs In
ADAMTS9	13:46083213-46083513	-0.274715	0.000521439	0.0164685	MXE	Pre vs In
ADAMTS9	13:46098917-46099011	0.415518	5.26084e-08	2.79796e-06	Cassette	In vs Post
ADAMTS9	13:46098917-46099011	0.395896	0.00244228	0.0148824	Cassette	Pre vs Post
ADAMTS9	13:46075810-46075828	-0.229519	0.00256001	0.0154762	A3SS	Pre vs Post
ADAMTS9	13:46101677-46101757	-0.158702	0.00812706	0.0371066	AltStart	Pre vs Post
ADD1	8:1627062-1627285	0.0729314	0.000149192	0.00625741	AltStart	Pre vs In
ADD1	8:1666724-1668732	-0.0533437	0.00236706	0.048147	A5SS	Pre vs In
ADD1	8:1627062-1627285	-0.0607764	0.0050173	0.0441654	AltStart	In vs Post
ADD1	8:1666724-1668732	-0.0326563	0.000230376	0.00230056	A5SS	Pre vs Post
ADGRA3	8:16755944-16766760	0.0980896	1.33258e-05	0.000884353	A3SS	Pre vs In
ADGRA3	8:16767078-16782419	0.103153	3.75104e-05	0.00209211	Cassette	Pre vs In
ADGRA3	8:16741552-16741847	0.0370362	0.000570942	0.0176336	Cassette	Pre vs In
ADGRA3	8:16775263-16775343	-0.206629	2.12797e-10	1.74793e-08	AltStart	In vs Post
ADGRA3	8:16741552-16741847	0.0278197	0.000300336	0.00497078	Cassette	In vs Post
ADGRA3	8:16700907-16700960	0.297872	0.00217354	0.0240543	A3SS	In vs Post
ADGRA3	8:16755944-16766760	0.238701	9.40822e-15	1.22466e-12	A3SS	Pre vs Post
ADGRA3	8:16775263-16782419	-0.158837	2.67872e-08	1.00043e-06	Cassette	Pre vs Post
ADGRA3	8:16782451-16786850	0.055336	6.72762e-05	0.000847786	A5SS	Pre vs Post
ADGRA3	8:16767079-16767159	0.0981149	0.000934367	0.00701216	AltStart	Pre vs Post
ADGRA3	8:16741073-16741125	0.0171692	0.00203163	0.0129206	Cassette	Pre vs Post
ADM5	6:54733272-54733302	0.291226	0.000213984	0.00827944	Cassette	Pre vs In
ADM5	6:54733272-54733302	-0.248271	0.000141643	0.00269163	Cassette	In vs Post
ADM5	6:54732976-54733211	-0.384355	0.00133215	0.0164685	A5SS	In vs Post
ADM5	6:54744895-54745532	0.103011	0.00639736	0.0309765	IR	Pre vs Post
AGBL5	3:112054920-112055000	-0.0783363	0.00210788	0.0446844	AltStart	Pre vs In
AGBL5	3:112054920-112055000	-0.0245513	0.00223863	0.0246027	AltStart	In vs Post
AGBL5	3:112054920-112055000	-0.102888	3.92129e-10	2.26968e-08	AltStart	Pre vs Post
AGBL5	3:112046534-112047185	0.0530408	9.17976e-05	0.00109285	IR	Pre vs Post
AHNAK	2:9205802-9205879	-0.654477	2.5325e-58	1.32772e-54	MXE	Pre vs In
AHNAK	2:9206857-9206904	-0.990214	1.14651e-55	4.8087e-52	MXE	Pre vs In
AHNAK	2:9205496-9205586	-0.651034	6.24098e-42	1.3088e-38	MXE	Pre vs In
AHNAK	2:9208993-9209028	-0.787313	1.7076e-34	2.55786e-31	Cassette	Pre vs In
AHNAK	2:9205432-9205495	-0.45431	2.09606e-31	2.74727e-28	A5SS	Pre vs In
AHNAK	2:9205880-9205915	-0.984615	8.40292e-27	9.78987e-24	A3SS	Pre vs In
AHNAK	2:9207067-9207160	0.308061	2.33764e-22	1.88549e-19	Cassette	Pre vs In
AHNAK	2:9208819-9208914	0.673346	6.37426e-22	4.95091e-19	MXE	Pre vs In
AHNAK	2:9209377-9209412	-0.562327	4.59884e-16	2.14316e-13	Cassette	Pre vs In
AHNAK	2:9207031-9207066	-0.430281	7.83854e-16	3.57352e-13	MXE	Pre vs In
AHNAK	2:9210181-9210270	0.624723	1.27477e-14	4.86058e-12	Cassette	Pre vs In
AHNAK	2:9209413-9209586	-1	7.25238e-14	2.53483e-11	MXE	Pre vs In
AHNAK	2:9210985-9211370	-0.167642	1.36235e-13	4.56562e-11	IR	Pre vs In
AHNAK	2:9200882-9200982	1	3.20651e-09	5.60364e-07	A3SS	Pre vs In
AHNAK	2:9203078-9203185	-0.40218	4.25711e-09	7.31769e-07	Cassette	Pre vs In
AHNAK	2:9208436-9208471	0.72043	2.53205e-08	3.40382e-06	A3SS	Pre vs In
AHNAK	2:9206185-9206568	-0.201741	1.75729e-07	2.00284e-05	MXE	Pre vs In
AHNAK	2:9204215-9204341	0.248917	6.16951e-07	6.28062e-05	A3SS	Pre vs In
AHNAK	2:9209084-9209109	0.240385	6.9721e-07	6.96247e-05	A3SS	Pre vs In
AHNAK	2:9202566-9202934	-0.187169	1.46464e-06	0.00013126	Cassette	Pre vs In
AHNAK	2:9201266-9201391	0.0943808	3.2336e-06	0.000259816	Cassette	Pre vs In
AHNAK	2:9200597-9200873	0.43118	4.26831e-06	0.000325493	A5SS	Pre vs In
AHNAK	2:9210815-9211074	-0.0971147	5.53248e-06	0.00040567	Cassette_multi	Pre vs In
AHNAK	2:9209586-9209971	0.105972	4.7866e-05	0.00251578	IR	Pre vs In
AHNAK	2:9206682-9206716	0.158664	6.27545e-05	0.00305497	A5SS	Pre vs In
AHNAK	2:9212020-9212077	-0.211819	0.00121058	0.0304401	A3SS	Pre vs In
AHNAK	2:9209149-9209154	-0.0535177	0.00128414	0.0317941	MXE	Pre vs In
AHNAK	2:9200659-9201044	-0.0496701	0.00223651	0.0464321	IR	Pre vs In
AHNAK	2:9205802-9205817	0.701525	4.06504e-28	2.04897e-25	A3SS	In vs Post
AHNAK	2:9205517-9205531	-0.508661	6.08385e-23	2.01385e-20	MXE	In vs Post
AHNAK	2:9209299-9209314	0.56776	2.67388e-21	7.5065e-19	A3SS	In vs Post
AHNAK	2:9207146-9207160	-0.912281	1.26936e-20	3.35141e-18	A5SS	In vs Post
AHNAK	2:9206953-9207030	0.123442	2.8436e-18	6.18288e-16	Cassette	In vs Post
AHNAK	2:9205880-9206184	-0.382317	3.5841e-17	7.09715e-15	Cassette	In vs Post
AHNAK	2:9206803-9206856	-0.912409	3.436e-16	6.19541e-14	MXE	In vs Post
AHNAK	2:9210937-9211026	1	5.53457e-16	9.89884e-14	A5SS	In vs Post
AHNAK	2:9202566-9202687	0.457214	1.62522e-11	1.57398e-09	MXE	In vs Post
AHNAK	2:9210985-9211370	0.100286	3.14854e-11	2.86181e-09	IR	In vs Post
AHNAK	2:9206682-9206716	-0.256219	6.78469e-11	5.92405e-09	A5SS	In vs Post
AHNAK	2:9200882-9200982	-0.995165	3.82858e-10	3.03251e-08	A3SS	In vs Post
AHNAK	2:9209029-9209298	0.48168	1.95143e-07	9.05415e-06	MXE	In vs Post
AHNAK	2:9203078-9203185	0.29612	3.11624e-06	0.000104849	Cassette	In vs Post
AHNAK	2:9206763-9206802	-0.139492	8.42345e-06	0.000251773	MXE	In vs Post
AHNAK	2:9205370-9205495	-0.298576	5.31264e-05	0.00119255	MXE	In vs Post
AHNAK	2:9208478-9208818	-0.298168	0.000171876	0.00313734	MXE	In vs Post
AHNAK	2:9204341-9204362	0.27659	0.000396149	0.00622224	A3SS	In vs Post
AHNAK	2:9210301-9210354	0.396552	0.00147057	0.0177831	Cassette	In vs Post
AHNAK	2:9200475-9200659	0.0672182	0.00213148	0.0236953	Cassette_multi	In vs Post
AHNAK	2:9204005-9204066	0.257237	0.00392734	0.0372383	A3SS	In vs Post
AHNAK	2:9209586-9209971	-0.0287958	0.00485973	0.0431116	IR	In vs Post
AHNAK	2:9208993-9209028	-0.899248	8.74545e-41	9.73325e-38	Cassette	Pre vs Post
AHNAK	2:9206863-9206904	-0.546762	9.87045e-35	8.13727e-32	A5SS	Pre vs Post
AHNAK	2:9205880-9205969	0.302276	6.84872e-20	1.53985e-17	Cassette	Pre vs Post
AHNAK	2:9208309-9208386	0.896417	3.54562e-19	7.24055e-17	MXE	Pre vs Post
AHNAK	2:9208852-9208914	1	1.26584e-16	2.02708e-14	MXE	Pre vs Post
AHNAK	2:9206763-9206802	-0.552482	4.28592e-15	6.00002e-13	MXE	Pre vs Post
AHNAK	2:9205370-9205417	-1	3.61857e-14	4.30726e-12	MXE	Pre vs Post
AHNAK	2:9205418-9205432	0.526701	5.13475e-14	6.0155e-12	MXE	Pre vs Post
AHNAK	2:9209299-9209412	0.246227	1.16865e-12	1.15101e-10	Cassette	Pre vs Post
AHNAK	2:9204341-9204403	0.753086	3.43772e-12	3.07311e-10	MXE	Pre vs Post
AHNAK	2:9208423-9208477	-0.134368	8.42705e-08	2.75444e-06	Cassette	Pre vs Post
AHNAK	2:9204182-9204262	-0.655516	2.47996e-06	5.16385e-05	MXE	Pre vs Post
AHNAK	2:9206185-9206418	-0.357718	3.30812e-05	0.00047354	MXE	Pre vs Post
AHNAK	2:9199798-9199876	-0.275072	4.26928e-05	0.000585881	A5SS	Pre vs Post
AHNAK	2:9208478-9208818	-0.307692	5.26447e-05	0.000694205	MXE	Pre vs Post
AHNAK	2:9210181-9210215	-0.0981731	5.96092e-05	0.000768053	A3SS	Pre vs Post
AHNAK	2:9209413-9209446	0.263272	7.22345e-05	0.000896904	Cassette	Pre vs Post
AHNAK	2:9200882-9201244	0.288383	0.000229509	0.00229395	Cassette	Pre vs Post
AHNAK	2:9209029-9209298	0.0767413	0.00139305	0.00960893	Cassette	Pre vs Post
AHNAK	2:9206953-9206968	-0.446367	0.00246147	0.014974	A3SS	Pre vs Post
AKAP8L	2:62199838-62200197	0.146931	0.000150795	0.00629943	Cassette_multi	Pre vs In
AKAP8L	2:62199838-62199886	-0.0692528	0.00423371	0.0390828	Cassette	In vs Post
AKAP8L	2:62200967-62201109	0.294223	1.19215e-05	0.000199519	Cassette	Pre vs Post
AKAP8L	2:62200086-62200197	0.257143	0.00206097	0.0130749	Cassette	Pre vs Post
AKAP8L	2:62199838-62199886	0.0969056	0.00605226	0.0297258	Cassette_multi	Pre vs Post
AKAP9	9:71977956-71978096	0.19483	9.71965e-15	3.77464e-12	Cassette	Pre vs In
AKAP9	9:72045995-72046174	0.0305755	0.00113359	0.0144403	Cassette	In vs Post
AKAP9	9:71977956-71978096	0.174207	6.34741e-12	5.4133e-10	Cassette	Pre vs Post
AKAP9	9:72045995-72046174	0.0305755	0.000945381	0.00707573	Cassette	Pre vs Post
ANK2	8:109341058-109341106	0.169333	0.00122528	0.0307361	Cassette	Pre vs In
ANK2	8:109398797-109398877	-0.25	6.75555e-09	4.24432e-07	AltStart	In vs Post
ANK2	8:109398797-109399302	-0.25	3.2599e-06	6.44424e-05	A5SS	Pre vs Post
ANK2	8:109341058-109341106	0.157627	0.00106846	0.00780535	Cassette	Pre vs Post
ANO3	2:34036814-34036894	45::68	-0.446429	2.09597e-08	2.89175e-06	AltStart
ANO3	2:33904864-33904915	-0.185122	4.50319e-06	0.000338482	AltStart	Pre vs In
ANO3	2:34036814-34036894	0.440198	1.69146e-27	8.33624e-25	AltStart	In vs Post
ANO3	2:33904864-33904915	0.374981	1.07033e-12	1.23007e-10	AltStart	In vs Post
ANO3	2:33904864-33904915	0.19617	0.000640441	0.00521609	AltStart	Pre vs Post
AP2M1	13:122099892-122099897	-0.181226	5.17022e-31	6.37793e-28	Cassette	Pre vs In
AP2M1	13:122100093-122100099	0.125845	4.78543e-06	0.000357136	A3SS	Pre vs In
AP2M1	13:122100093-122100099	-0.104688	9.34762e-05	0.001916	A3SS	In vs Post
AP2M1	13:122099892-122099897	0.0843787	0.000102528	0.0020728	Cassette	In vs Post
AP2M1	13:122099892-122099897	-0.0968468	3.61912e-16	5.4431e-14	Cassette	Pre vs Post
APLF	3:73771674-73771708	-0.123582	0.00168026	0.0380388	Cassette	Pre vs In
APLF	3:73771674-73771708	0.153875	5.94511e-05	0.00131325	Cassette	In vs Post
APLF	3:73774841-73775022	-0.230952	0.00243054	0.0262182	MXE	In vs Post
APLF	3:73821523-73823443	0.0284421	0.00594584	0.0293001	A3SS	Pre vs Post
ARAF	X:42079346-42079431	-0.434113	6.81574e-10	1.33582e-07	AltStart	Pre vs In
ARAF	X:42079346-42079431	0.235336	0.00244719	0.0263721	AltStart	In vs Post
ARAF	X:42079346-42079431	-0.198777	0.000640706	0.00521634	AltStart	Pre vs Post
ARFIP1	8:76253370-76253474	0.182514	3.39806e-06	0.000268151	Cassette	Pre vs In
ARFIP1	8:76217558-76217656	0.111826	0.000472903	0.0152924	Cassette	Pre vs In
ARFIP1	8:76217558-76217656	-0.221688	1.71368e-18	3.80061e-16	Cassette	In vs Post
ARFIP1	8:76217558-76217656	-0.109862	4.58315e-06	8.58002e-05	Cassette	Pre vs Post
ARHGAP21	10:50637251-50637280	-0.120692	0.00234029	0.047788	Cassette	Pre vs In
ARHGAP21	10:50591928-50592008	-0.0582011	0.000710633	0.00994349	AltStart	In vs Post
ARHGAP21	10:50591928-50592008	-0.0582011	3.32129e-05	0.000474814	AltStart	Pre vs Post
ARHGAP21	10:50540304-50540845	-0.0517241	0.000602803	0.00497877	A5SS	Pre vs Post
ARID5B	14:65552197-65552277	-0.0600513	0.00128081	0.0317492	AltStart	Pre vs In
ARID5B	14:65554626-65555557	-0.0742857	0.000223853	0.003903	Cassette	In vs Post
ARID5B	14:65552197-65552277	-0.0577118	0.000643823	0.00917086	AltStart	In vs Post
ARID5B	14:65552197-65552277	-0.117763	1.25275e-11	9.85332e-10	AltStart	Pre vs Post
ARID5B	14:65555213-65555557	-0.0544747	0.000213619	0.00216725	Cassette	Pre vs Post
ARIH2	13:31615902-31616054	0.0844627	0.000653491	0.0194113	A3SS	Pre vs In
ARIH2	13:31591282-31591327	-0.156155	2.45197e-05	0.000625055	Cassette	In vs Post
ARIH2	13:31570344-31571769	-0.0153846	0.00302009	0.0309231	AltStart	In vs Post
ARIH2	13:31570344-31571769	0.0305924	2.54977e-07	7.31384e-06	AltStart	Pre vs Post
ARIH2	13:31580435-31591327	-0.0702109	1.93788e-05	0.000302068	Cassette	Pre vs Post
ARIH2	13:31575948-31580409	0.0226878	3.18193e-05	0.000458424	A5SS	Pre vs Post
ARIH2	13:31615902-31616054	0.070741	0.00012387	0.00139536	A3SS	Pre vs Post
ARL15	16:33565397-33565599	0.110119	0.0012595	0.0313694	AltStart	Pre vs In
ARL15	16:33565397-33565599	-0.209381	7.33138e-12	7.3907e-10	AltStart	In vs Post
ARL15	16:33383297-33383377	0.0627866	0.000292729	0.00486668	AltEnd	In vs Post
ARL15	16:33552379-33552459	0.116592	1.16021e-05	0.000195497	AltStart	Pre vs Post
ARL15	16:33517356-33552254	-0.0245902	0.000235462	0.00233354	Cassette	Pre vs Post
ARL15	16:33517231-33517311	0.0388407	0.00820051	0.0373359	AltEnd	Pre vs Post
ATF6	4:88653332-88653412	0.0547945	5.17517e-05	0.00267227	AltEnd	Pre vs In
ATF6	4:88591756-88591855	0.126942	0.000193972	0.00346091	IR	In vs Post
ATF6	4:88653510-88654779	0.0547945	1.28399e-07	4.00846e-06	A5SS	Pre vs Post
ATF6	4:88653332-88653412	0.0547945	2.80227e-07	7.9561e-06	AltEnd	Pre vs Post
ATG7	13:67429228-67429370	0.539872	2.95778e-06	0.000240417	AltStart	Pre vs In
ATG7	13:67429228-67429370	0.00234834	0.000462215	0.00705993	AltStart	In vs Post
ATG7	13:67437948-67438141	0.13536	0.00238627	0.0258917	IR	In vs Post
ATG7	13:67429228-67429370	0.54222	1.07119e-14	1.37824e-12	AltStart	Pre vs Post
ATG7	13:67437948-67438141	0.312952	7.06692e-11	4.80279e-09	IR	Pre vs Post
ATG7	13:67581365-67581480	-0.0507614	0.000239995	0.00236584	AltEnd	Pre vs Post
ATG7	13:67437948-67438013	-0.00424375	0.00207674	0.0131257	A5SS	Pre vs Post
ATL3	2:8404216-8404484	0.0759377	0.00172135	0.0386908	A3SS	Pre vs In
ATL3	2:8399928-8399988	-0.0188357	0.00502455	0.0441674	A3SS	In vs Post
ATL3	2:8402881-8403906	0.0759377	7.68845e-06	0.000135823	A5SS	Pre vs Post
ATL3	2:8404216-8404484	0.0759377	4.4494e-05	0.000605745	A3SS	Pre vs Post
ATM	9:36621165-36621350	-0.129418	0.00115396	0.0294759	MXE	Pre vs In
ATM	9:36621165-36621350	0.250303	1.35759e-05	0.000376358	MXE	In vs Post
ATM	9:36623382-36623920	0.0171439	2.34581e-05	0.000355691	AltStart	Pre vs Post
ATXN1	7:12700304-12700384	-0.214459	0.00240185	0.0486659	AltEnd	Pre vs In
ATXN1	7:12720591-12720671	0.10423	0.000145192	0.00274978	AltStart	In vs Post
ATXN1	7:12700304-12700384	-0.248303	0.000213969	0.00216981	AltEnd	Pre vs Post
ATXN1	7:12720591-12720671	0.106247	0.000604908	0.0049868	AltStart	Pre vs Post
BPTF	12:14242433-14242606	0.0813008	0.00216544	0.0455093	Cassette	Pre vs In
BPTF	12:14163677-14163865	0.0817476	0.00301033	0.0308375	Cassette	In vs Post
BPTF	12:14213128-14213209	0.113238	0.00113813	0.00822014	A5SS	Pre vs Post
BPTF	12:14242433-14242606	0.0774648	0.00464082	0.0243465	Cassette	Pre vs Post
BPTF	12:14217448-14217609	0.0689528	0.00717083	0.0338599	Cassette	Pre vs Post
BSCL2	2:9055971-9056023	-0.183007	6.88167e-05	0.00324304	AltStart	Pre vs In
BSCL2	2:9056199-9056279	-0.221532	0.000306972	0.00506173	AltStart	In vs Post
BSCL2	2:9056199-9056279	-0.279974	1.84302e-07	5.48446e-06	AltStart	Pre vs Post
BUD23	3:10960166-10960266	0.259334	6.02547e-05	0.00298019	IR	Pre vs In
BUD23	3:10970259-10970316	0.148302	0.00043606	0.00672996	Cassette	In vs Post
BUD23	3:10960166-10960266	0.249743	1.7042e-06	3.71172e-05	IR	Pre vs Post
C7orf50	3:656024-656105	0.121212	0.0019813	0.0424411	Cassette	Pre vs In
C7orf50	3:670599-670679	0.26228	1.90548e-05	0.000502493	AltStart	In vs Post
C7orf50	3:656024-656105	-0.113343	0.00196267	0.0223335	Cassette	In vs Post
C7orf50	3:670599-670679	0.167696	0.00847142	0.0381325	AltStart	Pre vs Post
C9orf3	10:27161101-27161181	0.354037	0.00218659	0.0458093	AltStart	Pre vs In
C9orf3	10:27316362-27316442	-0.514286	2.40992e-06	8.3381e-05	AltStart	In vs Post
C9orf3	10:27160725-27160805	-0.165232	0.000198693	0.0035253	AltStart	In vs Post
C9orf3	10:27110065-27110145	0.119857	4.15908e-08	1.47886e-06	AltStart	Pre vs Post
C9orf3	10:27316362-27316442	-0.514286	1.30373e-07	4.04739e-06	AltStart	Pre vs Post
C9orf3	10:27084669-27084753	-0.707447	3.66403e-06	7.09814e-05	Cassette	Pre vs Post
C9orf3	10:27103303-27109786	0.0228324	4.19264e-05	0.000576074	Cassette	Pre vs Post
C9orf3	10:27116431-27116511	0.0884996	0.00147215	0.010061	AltStart	Pre vs Post
CACNA2D1	9:98189542-98189598	-0.224299	2.40499e-05	0.00142875	Cassette	Pre vs In
CACNA2D1	9:98217922-98217958	0.159082	0.000374053	0.0127549	Cassette	Pre vs In
CACNA2D1	9:98189542-98189598	-0.349498	1.58621e-09	1.12035e-07	Cassette	In vs Post
CACNA2D1	9:97781090-97781688	-0.0903639	5.8655e-06	0.000182447	AltStart	In vs Post
CACNA2D1	9:98189542-98189598	-0.601751	1.22371e-20	3.28175e-18	Cassette	Pre vs Post
CACNA2D1	9:98217922-98217958	0.131467	0.000397812	0.00357484	Cassette	Pre vs Post
CACNA2D1	9:98261819-98265922	0.00185185	0.000608969	0.00501168	AltEnd	Pre vs Post
CALD1	18:14451600-14452120	-0.0512526	5.26996e-06	0.000389142	AltStart	Pre vs In
CALD1	18:14301621-14301784	0.245886	1.43492e-05	0.000934525	IR	Pre vs In
CALD1	18:14484381-14484461	55::22	-0.359367	2.11676e-05	0.00128296	AltStart
CALD1	18:14451600-14452120	-0.0966526	0.000111031	0.00220649	AltStart	In vs Post
CALD1	18:14478439-14478503	0.117711	0.000281584	0.00471318	AltStart	In vs Post
CALD1	18:14451600-14452120	-0.147905	1.63301e-12	1.54677e-10	AltStart	Pre vs Post
CALD1	18:14478439-14478503	-0.369951	1.54079e-09	7.79467e-08	AltStart	Pre vs Post
CALD1	18:14301621-14301784	0.146084	0.000784107	0.00611971	IR	Pre vs Post
CALD1	18:14306431-14320612	-0.00653983	0.00295346	0.0172392	A3SS	Pre vs Post
CALD1	18:14300064-14300141	0.00475446	0.00753089	0.0350251	Cassette	Pre vs Post
CALD1	18:14340304-14341638	-0.100537	0.0113959	0.0477345	Cassette	Pre vs Post
CAPS2	5:38582431-38582527	-0.833333	1.64837e-06	0.000145243	Cassette	Pre vs In
CAPS2	5:38616329-38616374	-0.496503	0.00135768	0.0167065	MXE	In vs Post
CAPS2	5:38582431-38582527	-0.8125	0.000161527	0.00173654	Cassette	Pre vs Post
CAST	2:103255783-103255992	-0.267577	3.23214e-07	3.54875e-05	AltStart	Pre vs In
CAST	2:103367939-103368019	0.0518149	0.00237613	0.048238	AltEnd	Pre vs In
CAST	2:103324699-103324764	0.132076	0.00279563	0.0292597	Cassette	In vs Post
CAST	2:103255783-103255992	-0.244206	3.46775e-05	0.000492903	AltStart	Pre vs Post
CAST	2:103367939-103368019	0.0409431	0.00279313	0.016544	AltEnd	Pre vs Post
CEP85L	1:43458852-43458932	-0.224678	1.41269e-05	0.000925799	AltEnd	Pre vs In
CEP85L	1:43412134-43412214	0.130841	0.000292975	0.0105155	AltEnd	Pre vs In
CEP85L	1:43458852-43458932	-0.140374	0.000105876	0.00212116	AltEnd	In vs Post
CEP85L	1:43458852-43458932	-0.365052	1.91933e-14	2.40013e-12	AltEnd	Pre vs Post
CEP85L	1:43441648-43450014	-0.366024	0.000128536	0.00143701	A5SS	Pre vs Post
CFLAR	15:104781836-104782006	-0.176136	8.15127e-08	1.00553e-05	Cassette	Pre vs In
CFLAR	15:104781836-104782006	0.0937129	4.06126e-05	0.000958773	Cassette_multi	In vs Post
CFLAR	15:104782826-104782955	-0.174856	0.000129589	0.00248834	Cassette	In vs Post
CFLAR	15:104807303-104807359	0.097962	0.000401595	0.0062944	Cassette	In vs Post
CFLAR	15:104782006-104782955	-0.244758	4.7317e-09	2.14071e-07	A5SS	Pre vs Post
CHD3	12:53151754-53151834	0.0697856	0.00012398	0.00536079	Cassette	Pre vs In
CHD3	12:53158161-53158262	0.080793	6.51182e-05	0.00141587	Cassette	In vs Post
CHD3	12:53158161-53158262	0.0999363	3.89717e-09	1.7923e-07	Cassette	Pre vs Post
CHD3	12:53151754-53151834	0.0792206	4.90877e-05	0.000656636	Cassette	Pre vs Post
CHD8	7:77776762-77776878	0.0905968	0.000446155	0.0146881	Cassette	Pre vs In
CHD8	7:77776365-77776418	0.161073	0.00042316	0.00657203	A5SS	In vs Post
CHD8	7:77779169-77780205	-0.165867	0.000586205	0.00850172	AltEnd	In vs Post
CHD8	7:77778925-77779169	0.0202608	0.0111858	0.0471203	A3SS	Pre vs Post
CHST15	14:133535005-133535085	0.24231	7.88081e-05	0.00368081	AltStart	Pre vs In
CHST15	14:133498612-133498692	-0.240392	0.000744668	0.0214217	AltStart	Pre vs In
CHST15	14:133543924-133544019	0.185185	0.000410734	0.00641045	AltStart	In vs Post
CHST15	14:133542836-133542926	-0.167033	0.00108299	0.0139319	AltStart	In vs Post
CHST15	14:133498612-133498692	0.170139	0.00390716	0.0371105	AltStart	In vs Post
CHST15	14:133535005-133535085	0.225081	8.50687e-08	2.77239e-06	AltStart	Pre vs Post
CHST15	14:133543924-133544019	0.165954	0.0049244	0.0254139	AltStart	Pre vs Post
CLSTN1	6:70093781-70093837	-0.12299	6.12676e-05	0.00302316	Cassette	Pre vs In
CLSTN1	6:70114325-70114379	0.217627	8.99257e-15	1.30351e-12	Cassette	In vs Post
CLSTN1	6:70114325-70114379	0.2263	2.73027e-16	4.19125e-14	Cassette	Pre vs Post
CNNM2	14:113936924-113937004	-0.337667	1.48509e-06	0.000132176	AltStart	Pre vs In
CNNM2	14:113936924-113937004	0.40328	2.36395e-12	2.55745e-10	AltStart	In vs Post
CNNM2	14:114047410-114047475	-0.274975	1.8036e-06	6.48302e-05	Cassette	In vs Post
CNNM2	14:114047410-114047475	-0.185543	0.00118453	0.00848072	Cassette	Pre vs Post
CNNM2	14:113936924-113937004	0.0656138	0.00499238	0.0256463	AltStart	Pre vs Post
COL1A1	12:26390325-26390338	1	7.44847e-10	1.43304e-07	A5SS	Pre vs In
COL1A1	12:26393317-26393328	0.32967	8.70054e-05	0.00401892	A5SS	Pre vs In
COL1A1	12:26389453-26389481	0.00288853	2.14052e-12	2.33855e-10	IR	In vs Post
COL1A1	12:26384583-26384629	-0.00503424	0.00412438	0.0384492	IR	In vs Post
COL1A1	12:26389453-26389481	0.00288853	2.30143e-11	1.72483e-09	IR	Pre vs Post
COL1A1	12:26384583-26384629	-0.00507579	0.002111	0.0132754	IR	Pre vs Post
COL1A1	12:26381877-26381905	0.0213256	0.00776527	0.0359051	A3SS	Pre vs Post
COL1A2	9:74200761-74200814	-1	3.00185e-09	5.29006e-07	MXE	Pre vs In
COL1A2	9:74187950-74187994	0.464678	2.0363e-08	2.82803e-06	MXE	Pre vs In
COL1A2	9:74206956-74206965	0.5	2.29815e-06	0.000195913	A3SS	Pre vs In
COL1A2	9:74200363-74200394	0.851852	2.05983e-05	0.00125572	A5SS	Pre vs In
COL1A2	9:74187950-74187994	-0.597031	1.96639e-08	1.14164e-06	MXE	In vs Post
COL1A2	9:74177188-74177583	0.0277719	9.99102e-07	2.31175e-05	A5SS	Pre vs Post
COL3A1	15:93592481-93592554	0.000399563	6.15759e-09	9.93635e-07	IR	Pre vs In
COL3A1	15:93556967-93557061	-0.000158541	7.52996e-09	1.16971e-06	IR	Pre vs In
COL3A1	15:93594396-93594421	-0.000296949	1.06389e-06	0.000100048	IR	Pre vs In
COL3A1	15:93582765-93582863	1	8.47746e-22	2.54072e-19	MXE	In vs Post
COL3A1	15:93592481-93592554	-0.000399563	7.45637e-18	1.54549e-15	IR	In vs Post
COL3A1	15:93577793-93577802	0.875	3.31228e-06	0.000110466	A5SS	In vs Post
COL3A1	15:93580622-93580633	0.536131	7.41636e-06	0.000225251	A5SS	In vs Post
COL3A1	15:93577982-93578051	0.860465	5.37949e-05	0.0012039	A3SS	In vs Post
COL3A1	15:93592504-93592571	6.25377e-05	5.34267e-17	8.94153e-15	IR	Pre vs Post
COL3A1	15:93556971-93557060	1.93983e-05	4.34977e-07	1.16093e-05	IR	Pre vs Post
COL3A1	15:93594396-93594421	-0.000250939	8.40665e-05	0.00101453	IR	Pre vs Post
COMMD6	11:47635172-47635323	-0.654167	2.39236e-34	3.34467e-31	AltStart	Pre vs In
COMMD6	11:47635172-47635323	0.0163639	2.34519e-07	1.0702e-05	AltStart	In vs Post
COMMD6	11:47652938-47653018	0.146446	6.07996e-06	0.000188326	AltStart	In vs Post
COMMD6	11:47635172-47635323	-0.373361	8.98329e-11	5.95116e-09	AltStart	Pre vs Post
CORO1C	14:42158753-42158833	-0.345455	0.000271539	0.00993796	AltStart	Pre vs In
CORO1C	14:42158753-42158833	-0.31354	1.43226e-09	1.03132e-07	AltStart	In vs Post
CORO1C	14:42158753-42158833	-0.658994	3.44107e-29	2.12763e-26	AltStart	Pre vs Post
CPEB2	8:10354531-10354611	14::26	-0.428571	0.00182323	0.0400367	AltStart
CPEB2	8:10407214-10407303	-0.159043	7.35135e-06	0.000223646	Cassette_multi	In vs Post
CPEB2	8:10441528-10441551	-0.24619	6.10745e-05	0.00134509	Cassette	In vs Post
CPEB2	8:10354531-10354611	-0.323367	0.000111231	0.00220849	AltStart	In vs Post
CPEB2	8:10301243-10301312	0.232143	0.000452614	0.00694196	Cassette	In vs Post
CPEB2	8:10354531-10354611	-0.746154	1.64225e-10	1.04442e-08	AltStart	Pre vs Post
CPEB2	8:10441528-10441551	-0.392857	4.68012e-07	1.23576e-05	Cassette	Pre vs Post
CPEB2	8:10421819-10427201	0.172811	0.000303613	0.0028624	Cassette_multi	Pre vs Post
CPEB2	8:10301243-10301312	0.232143	0.00058604	0.0048656	Cassette	Pre vs Post
CPEB2	8:10415724-10418250	0.0357067	0.000972921	0.00724686	A5SS	Pre vs Post
CPEB2	8:10407214-10408153	-0.0903431	0.0054789	0.0275347	Cassette_multi	Pre vs Post
CPSF2	7:113663735-113663794	-0.106744	6.23669e-05	0.00305497	Cassette	Pre vs In
CPSF2	7:113689314-113689394	-0.0755287	4.16513e-05	0.000979579	AltStart	In vs Post
CPSF2	7:113660117-113661504	0.0627767	0.00105385	0.0136441	AltStart	In vs Post
CPSF2	7:113660117-113661504	0.0661454	1.53737e-12	1.46241e-10	AltStart	Pre vs Post
CPSF2	7:113663735-113663794	-0.111334	6.02841e-08	2.05533e-06	Cassette	Pre vs Post
CPSF2	7:113689314-113689394	-0.0755287	7.26411e-05	0.000900289	AltStart	Pre vs Post
CRYZ	6:138439305-138441040	0.0271863	0.00022142	0.00847336	Cassette_multi	Pre vs In
CRYZ	6:138439305-138441040	0.0481451	6.04261e-06	0.000187431	Cassette_multi	In vs Post
CRYZ	6:138435453-138435551	-0.00207039	0.00446012	0.0406239	A5SS	In vs Post
CRYZ	6:138439305-138441040	0.0753314	1.25741e-14	1.59027e-12	Cassette_multi	Pre vs Post
CRYZ	6:138435453-138435551	-0.00207039	6.40183e-07	1.58508e-05	A5SS	Pre vs Post
CSNK1A1	2:150618483-150622549	0.063964	0.00184616	0.0403711	A5SS	Pre vs In
CSNK1A1	2:150633726-150633809	-0.0848507	0.00014997	0.00282827	Cassette	In vs Post
CSNK1A1	2:150618483-150622549	0.129478	2.60801e-07	7.46166e-06	A5SS	Pre vs Post
CSNK1A1	2:150633726-150633809	-0.0976421	3.38954e-06	6.65911e-05	Cassette	Pre vs Post
CSNK1A1	2:150615247-150617750	0.0608	5.51381e-06	0.000101515	A3SS	Pre vs Post
CTNND1	2:13183505-13183588	-0.0831025	1.3e-06	0.000119572	Cassette	Pre vs In
CTNND1	2:13184753-13184867	0.248182	2.69236e-13	3.35457e-11	Cassette_multi	In vs Post
CTNND1	2:13183505-13183588	0.0831025	9.81147e-09	6.02767e-07	Cassette	In vs Post
CTNND1	2:13182838-13183126	-0.103747	9.44767e-05	0.00193116	Cassette_multi	In vs Post
CTNND1	2:13169625-13169642	0.0462186	0.00522155	0.0453598	Cassette	In vs Post
CTNND1	2:13184753-13184867	0.275929	2.3759e-16	3.69168e-14	Cassette	Pre vs Post
CTNND1	2:13178359-13178919	0.0332777	3.37744e-05	0.000481604	A5SS	Pre vs Post
CTNND1	2:13169625-13169642	0.0568708	0.000730659	0.00578682	Cassette	Pre vs Post
CTNND1	2:13158887-13158973	-0.0229927	0.00345743	0.0194488	Cassette	Pre vs Post
CUL1	9:109533054-109535245	-0.00291991	0.00146172	0.0347154	AltStart	Pre vs In
CUL1	9:109557484-109557506	-0.0996708	0.00402426	0.0378499	Cassette	In vs Post
CUL1	9:109533054-109535245	0.0172414	0.000188255	0.00195811	AltStart	Pre vs Post
CYP19A1	1:120525254-120525356	0.00115628	1.37158e-13	4.56562e-11	IR	Pre vs In
CYP19A1	1:120664901-120664981	0.297297	3.60279e-12	1.06414e-09	AltEnd	Pre vs In
CYP19A1	1:120530883-120530911	0.00605359	2.2349e-11	5.78618e-09	IR	Pre vs In
CYP19A1	1:120665728-120665808	0.961746	1.10187e-08	1.67444e-06	AltEnd	Pre vs In
CYP19A1	1:120553642-120557776	0.192987	2.36936e-08	3.22465e-06	AltEnd	Pre vs In
CYP19A1	1:120524924-120525004	-0.666667	6.03608e-07	6.17476e-05	AltStart	Pre vs In
CYP19A1	1:120555082-120557776	0.124668	2.42088e-06	0.000203073	AltEnd	Pre vs In
CYP19A1	1:120665506-120665586	0.224086	1.7524e-05	0.001097	AltEnd	Pre vs In
CYP19A1	1:120525212-120530937	-0.00879121	6.21053e-05	0.00305014	AltStart	Pre vs In
CYP19A1	1:120543246-120544316	1	0.000500726	0.0159828	A3SS	Pre vs In
CYP19A1	1:120542436-120542674	-0.00253825	0.000730477	0.0211003	Cassette	Pre vs In
CYP19A1	1:120553642-120557776	-0.21421	4.72009e-06	0.000151275	AltEnd	In vs Post
CYP19A1	1:120555082-120557776	-0.143301	1.7886e-05	0.000477923	AltEnd	In vs Post
CYP19A1	1:120548346-120549922	-0.103018	0.0002902	0.00483187	A3SS	In vs Post
CYP19A1	1:120547314-120547340	0.0756579	0.00133782	0.00929204	A5SS	Pre vs Post
CYP20A1	15:106643579-106643621	0.163477	6.33345e-05	0.00307067	Cassette	Pre vs In
CYP20A1	15:106541447-106541527	0.0866103	6.54178e-05	0.00314166	AltEnd	Pre vs In
CYP20A1	15:106644078-106644101	0.154454	0.000649795	0.0193289	A3SS	Pre vs In
CYP20A1	15:106582380-106582466	-0.204415	0.000283682	0.00474115	Cassette	In vs Post
CYP20A1	15:106737725-106737805	0.0752092	1.13459e-05	0.000191709	AltStart	Pre vs Post
CYP20A1	15:106643579-106643621	0.166869	1.20124e-05	0.000200588	Cassette	Pre vs Post
CYP20A1	15:106644078-106644101	0.160539	0.00030657	0.00288417	A3SS	Pre vs Post
CYP20A1	15:106738133-106738799	0.075268	0.00148502	0.0100988	A3SS	Pre vs Post
CYP20A1	15:106541447-106541527	0.0738761	0.00153918	0.0103946	AltEnd	Pre vs Post
CYP20A1	15:106679235-106679336	0.0140845	0.00237219	0.0145502	AltEnd	Pre vs Post
CYP20A1	15:106696722-106696913	0.00434783	0.00349579	0.0196334	AltStart	Pre vs Post
DAB2	16:24609000-24609062	-0.520721	3.77433e-09	6.54144e-07	MXE	Pre vs In
DAB2	16:24609000-24609062	-0.335369	1.74017e-09	1.21746e-07	MXE	In vs Post
DAB2	16:24602381-24605124	0.134779	0.000216172	0.00379894	Cassette	In vs Post
DAB2	16:24609000-24609062	-0.85609	8.79011e-25	3.31625e-22	MXE	Pre vs Post
DAB2	16:24602381-24605124	0.225361	1.49387e-07	4.56131e-06	Cassette	Pre vs Post
DAG1	13:32037331-32037387	-0.0822657	0.000129349	0.00556997	Cassette	Pre vs In
DAG1	13:32034940-32035020	0.0765826	1.28012e-05	0.000357113	AltStart	In vs Post
DAG1	13:32059756-32059882	0.248414	0.002866	0.029702	MXE	In vs Post
DAG1	13:32035804-32037387	0.134248	0.00295908	0.0304815	Cassette_multi	In vs Post
DAG1	13:32029471-32029757	-0.191342	0.0014381	0.00986849	A5SS	Pre vs Post
DAG1	13:32034940-32035020	0.0368387	0.00204565	0.0129949	AltStart	Pre vs Post
DAG1	13:32059756-32059882	0.110116	0.00370294	0.0204678	Cassette	Pre vs Post
DAG1	13:32043868-32043948	0.0170261	0.0067194	0.0321996	AltEnd	Pre vs Post
DAG1	13:32059508-32059669	-0.00910006	0.00783613	0.0361395	Cassette	Pre vs Post
DCAF6	4:82995475-82995534	0.14642	7.66153e-07	7.50795e-05	Cassette	Pre vs In
DCAF6	4:82921377-82923027	0.26521	0.0004252	0.0141537	IR	Pre vs In
DCAF6	4:82921377-82923027	0.142973	0.00245332	0.0264254	IR	In vs Post
DCAF6	4:82921377-82923027	0.408183	8.80718e-11	5.88706e-09	IR	Pre vs Post
DCAF6	4:82995475-82995534	0.15662	4.17352e-09	1.90756e-07	Cassette	Pre vs Post
DCAF6	4:83038523-83038651	-0.186442	4.03104e-07	1.08497e-05	Cassette	Pre vs Post
DCAF6	4:82980720-82980890	0.0055488	0.000458005	0.00400264	Cassette	Pre vs Post
DCAF6	4:83026467-83026700	0.0457962	0.000920584	0.00692741	Cassette	Pre vs Post
DLC1	17:1611242-1611308	-0.104358	0.000151878	0.0063195	MXE	Pre vs In
DLC1	17:1561257-1561416	-0.130409	0.000699459	0.0203163	Cassette	Pre vs In
DLC1	17:1215014-1215094	-0.290253	2.96407e-11	2.70523e-09	AltStart	In vs Post
DLC1	17:1576857-1576991	0.263421	3.99985e-06	0.000130839	Cassette	In vs Post
DLC1	17:1611242-1611308	-0.334184	5.99307e-06	0.000186154	MXE	In vs Post
DLC1	17:1215014-1215094	-0.248979	3.90917e-16	5.80095e-14	AltStart	Pre vs Post
DLC1	17:1560537-1560850	-0.193307	5.13869e-09	2.30145e-07	AltStart	Pre vs Post
DLC1	17:1576857-1576991	0.228222	6.53184e-07	1.60845e-05	Cassette	Pre vs Post
DLC1	17:1611242-1611308	-0.271	0.000430797	0.00381455	MXE	Pre vs Post
DMD	X:27035809-27035840	-0.258223	0.000148807	0.00625376	Cassette	Pre vs In
DMD	X:28444104-28444184	-0.178082	2.91773e-07	1.29161e-05	AltStart	In vs Post
DMD	X:27182768-27182787	-0.335937	2.14131e-06	7.51424e-05	AltStart	In vs Post
DMD	X:27035809-27035840	-0.113013	4.02272e-05	0.000953162	Cassette	In vs Post
DMD	X:27089751-27089818	-0.0689319	0.00154573	0.0184805	Cassette_multi	In vs Post
DMD	X:27035809-27035840	-0.371236	7.56082e-12	6.30323e-10	Cassette	Pre vs Post
DMD	X:27182768-27182787	-0.328866	0.000237131	0.00234558	AltStart	Pre vs Post
DMD	X:28444104-28444184	-0.166588	0.00118496	0.00848102	AltStart	Pre vs Post
DNAJC24	2:29283691-29283771	0.1569	1.16849e-07	1.39229e-05	AltStart	Pre vs In
DNAJC24	2:29282072-29283493	0.237789	0.000824298	0.0232343	A3SS	Pre vs In
DNAJC24	2:29248988-29249100	-0.0844105	0.00303882	0.031029	Cassette	In vs Post
DNAJC24	2:29282072-29283493	0.244914	3.75755e-07	1.03514e-05	A3SS	Pre vs Post
DNAJC24	2:29283691-29285716	0.199017	0.000222488	0.00223987	A5SS	Pre vs Post
DNM2	2:69551180-69551191	0.183057	4.72735e-05	0.00249679	Cassette	Pre vs In
DNM2	2:69540533-69540974	0.169678	8.86242e-05	0.00182838	MXE	In vs Post
DNM2	2:69551180-69551191	0.166016	1.35001e-06	3.02314e-05	Cassette	Pre vs Post
DNM2	2:69540533-69540974	0.197698	3.10776e-06	6.22084e-05	MXE	Pre vs Post
DNM2	2:69574144-69574756	0.176359	0.000170042	0.00180667	IR	Pre vs Post
DNM2	2:69574740-69574756	0.0325796	0.000840331	0.00646112	A3SS	Pre vs Post
DST	7:29211051-29211131	0.107937	5.94029e-05	0.002959	AltStart	Pre vs In
DST	7:29288805-29288822	-0.121445	0.00211869	0.0448347	Cassette	Pre vs In
DST	7:29176159-29176239	-0.103672	1.71634e-11	1.64784e-09	AltStart	In vs Post
DST	7:29288805-29288822	-0.0968546	2.6205e-08	1.49019e-06	Cassette	In vs Post
DST	7:29294637-29294747	0.0942143	1.59452e-07	7.60502e-06	Cassette	In vs Post
DST	7:29292815-29292886	0.0582686	1.97747e-05	0.000517785	Cassette	In vs Post
DST	7:29067628-29068605	-0.0945338	0.00110114	0.0141081	AltStart	In vs Post
DST	7:29288805-29288822	-0.2183	4.6922e-20	1.09941e-17	Cassette	Pre vs Post
DST	7:29292815-29292886	0.105976	8.84317e-11	5.89273e-09	Cassette	Pre vs Post
DST	7:29294637-29294747	0.10532	2.34224e-10	1.43625e-08	Cassette	Pre vs Post
DST	7:29176159-29176239	-0.103672	2.43337e-10	1.48396e-08	AltStart	Pre vs Post
DST	7:29067628-29068605	-0.178984	1.25606e-06	2.83557e-05	AltStart	Pre vs Post
DST	7:29211051-29211131	0.113523	7.5559e-06	0.000133588	AltStart	Pre vs Post
DST	7:29163090-29164114	0.0309094	0.000478813	0.00413739	A3SS	Pre vs Post
DST	7:29162690-29162770	0.0309094	0.00542714	0.0273419	AltStart	Pre vs Post
EEF2	2:74751466-74751585	0.005279	2.6289e-09	4.67208e-07	IR	Pre vs In
EEF2	2:74751466-74751585	-0.00307168	0.00593702	0.0498566	IR	In vs Post
EEF2	2:74751466-74751585	0.00220733	0.000119055	0.00135206	IR	Pre vs Post
EIF4G1	13:122204479-122204535	0.11615	0.00119099	0.030092	Cassette	Pre vs In
EIF4G1	13:122204535-122204753	0.176251	0.00538174	0.0463519	IR	In vs Post
EIF4G1	13:122204535-122204753	0.162605	0.000178327	0.00187944	IR	Pre vs Post
EMC2	4:29041455-29043944	0.0118019	0.00115184	0.0294759	A3SS	Pre vs In
EMC2	4:29024670-29024825	-0.199428	1.70286e-05	0.000460001	AltEnd	In vs Post
EMC2	4:29041455-29043944	0.0155789	5.84479e-08	2.0077e-06	A3SS	Pre vs Post
EMC2	4:29038357-29038461	0.0207247	0.00218417	0.0136374	Cassette	Pre vs Post
EMC2	4:29027160-29034785	0.0253153	0.00235028	0.0144593	Cassette	Pre vs Post
EMC2	4:29024825-29025653	0.0965909	0.00424149	0.0226787	A3SS	Pre vs Post
ENSSSCG00000000887	AEMK02000183.1:20265-20357	0.122345	0.000207591	0.00810689	Cassette	Pre vs In
ENSSSCG00000000887	AEMK02000183.1:34301-34396	-0.291162	8.90652e-10	6.60631e-08	Cassette_multi	In vs Post
ENSSSCG00000000887	AEMK02000183.1:20265-20345	-0.148248	0.00012157	0.00237548	AltEnd	In vs Post
ENSSSCG00000000887	AEMK02000183.1:34798-34908	0.0898701	0.00409048	0.0382295	Cassette_multi	In vs Post
ENSSSCG00000000887	AEMK02000183.1:34301-34396	-0.322393	7.90843e-12	6.56842e-10	Cassette_multi	Pre vs Post
ENSSSCG00000000887	AEMK02000183.1:34798-34908	0.121416	7.92606e-06	0.000139688	Cassette_multi	Pre vs Post
ENSSSCG00000001229	7:22940066-22940106	0.449004	3.18368e-45	9.53785e-42	Cassette	Pre vs In
ENSSSCG00000001229	7:22957789-22957960	-0.492845	7.0658e-22	5.29203e-19	MXE	Pre vs In
ENSSSCG00000001229	7:22869887-22869934	0.508772	2.40945e-18	1.40357e-15	Cassette	Pre vs In
ENSSSCG00000001229	7:22825525-22825605	0.17466	2.74584e-18	1.51534e-15	AltStart	Pre vs In
ENSSSCG00000001229	7:22825365-22825445	0.454338	5.12762e-18	2.75721e-15	AltStart	Pre vs In
ENSSSCG00000001229	7:22869875-22869886	0.775824	1.94626e-17	9.95488e-15	A5SS	Pre vs In
ENSSSCG00000001229	7:22958710-22958742	0.175425	3.67482e-16	1.75147e-13	Cassette_multi	Pre vs In
ENSSSCG00000001229	7:22889800-22890075	0.188582	3.38615e-15	1.36559e-12	MXE	Pre vs In
ENSSSCG00000001229	7:22891080-22891152	-0.10447	2.22035e-13	7.16354e-11	A3SS	Pre vs In
ENSSSCG00000001229	7:22889305-22889419	0.423256	2.47528e-11	6.33037e-09	A3SS	Pre vs In
ENSSSCG00000001229	7:22826215-22826272	-0.159495	5.4642e-11	1.31712e-08	Cassette	Pre vs In
ENSSSCG00000001229	7:22941169-22941215	-0.113887	8.59348e-11	1.98037e-08	Cassette	Pre vs In
ENSSSCG00000001229	7:22870301-22870340	-0.387108	1.12663e-10	2.51345e-08	A5SS	Pre vs In
ENSSSCG00000001229	7:22890686-22890737	0.183037	1.88747e-10	4.16655e-08	Cassette	Pre vs In
ENSSSCG00000001229	7:22940124-22940165	0.236326	3.07738e-10	6.38967e-08	MXE	Pre vs In
ENSSSCG00000001229	7:22956420-22956689	0.0778842	1.0563e-06	9.97822e-05	Cassette	Pre vs In
ENSSSCG00000001229	7:22958873-22958923	0.0677259	3.25005e-06	0.000260091	Cassette_multi	Pre vs In
ENSSSCG00000001229	7:22853799-22853853	0.304219	3.62463e-06	0.000281527	A3SS	Pre vs In
ENSSSCG00000001229	7:22919170-22919250	-0.428571	8.85099e-06	0.000610572	MXE	Pre vs In
ENSSSCG00000001229	7:22956159-22956239	0.123128	1.57189e-05	0.001005	AltStart	Pre vs In
ENSSSCG00000001229	7:22938701-22938970	0.152593	3.41685e-05	0.00194186	MXE	Pre vs In
ENSSSCG00000001229	7:22940460-22940570	0.121277	0.000196106	0.00770071	MXE	Pre vs In
ENSSSCG00000001229	7:22869875-22869886	0.775824	0.000287071	0.0103617	A5SS	Pre vs In
ENSSSCG00000001229	7:22854565-22854645	0.0676699	0.00104525	0.027607	AltEnd	Pre vs In
ENSSSCG00000001229	7:22956650-22956689	0.439298	3.73715e-62	9.20917e-59	Cassette	In vs Post
ENSSSCG00000001229	7:22889305-22889361	0.343207	7.96191e-61	1.60527e-57	MXE	In vs Post
ENSSSCG00000001229	7:22891625-22891657	0.462723	3.07421e-46	4.26124e-43	Cassette	In vs Post
ENSSSCG00000001229	7:22870230-22870281	0.379596	4.28369e-36	3.80015e-33	A3SS	In vs Post
ENSSSCG00000001229	7:22869876-22869886	-0.600353	2.54287e-29	1.40989e-26	MXE	In vs Post
ENSSSCG00000001229	7:22855173-22855187	1	4.57337e-27	2.06996e-24	A3SS	In vs Post
ENSSSCG00000001229	7:22825330-22825445	0.197068	3.7683e-25	1.51951e-22	Cassette	In vs Post
ENSSSCG00000001229	7:22890686-22890737	0.727019	2.90925e-22	8.83853e-20	MXE	In vs Post
ENSSSCG00000001229	7:22941493-22941512	0.174171	9.29184e-20	2.26456e-17	Cassette	In vs Post
ENSSSCG00000001229	7:22827784-22827795	-1	6.18116e-18	1.31813e-15	A5SS	In vs Post
ENSSSCG00000001229	7:22920060-22920196	0.0268696	2.18672e-16	4.07539e-14	Cassette	In vs Post
ENSSSCG00000001229	7:22939312-22939401	0.258977	1.11721e-15	1.92073e-13	Cassette	In vs Post
ENSSSCG00000001229	7:22891080-22891152	0.0881694	1.8568e-12	2.06936e-10	A3SS	In vs Post
ENSSSCG00000001229	7:22956916-22957191	-0.123203	3.92257e-11	3.49376e-09	Cassette	In vs Post
ENSSSCG00000001229	7:22918063-22918132	0.229111	8.20605e-11	7.10913e-09	Cassette	In vs Post
ENSSSCG00000001229	7:22854051-22854131	0.856118	9.75381e-11	8.3845e-09	MXE	In vs Post
ENSSSCG00000001229	7:22941002-22941034	0.132561	1.6341e-09	1.14687e-07	MXE	In vs Post
ENSSSCG00000001229	7:22889800-22890075	-0.223595	2.98192e-09	2.00403e-07	MXE	In vs Post
ENSSSCG00000001229	7:22826663-22826720	0.0505242	3.61654e-07	1.56046e-05	A5SS	In vs Post
ENSSSCG00000001229	7:22855173-22855187	1	7.4025e-07	2.92643e-05	A3SS	In vs Post
ENSSSCG00000001229	7:22853799-22853853	-0.268491	1.60234e-06	5.84484e-05	A3SS	In vs Post
ENSSSCG00000001229	7:22959123-22959194	-0.284345	2.67451e-06	9.15313e-05	Cassette	In vs Post
ENSSSCG00000001229	7:22938303-22938383	-0.0315545	5.84267e-06	0.000182249	AltStart	In vs Post
ENSSSCG00000001229	7:22941513-22945277	-0.0168133	0.000205655	0.00363428	AltEnd	In vs Post
ENSSSCG00000001229	7:22958710-22958742	0.0666497	0.000556171	0.00815792	Cassette_multi	In vs Post
ENSSSCG00000001229	7:22827331-22827381	0.0882383	0.00107436	0.0138449	Cassette	In vs Post
ENSSSCG00000001229	7:22940460-22940570	-0.144201	0.00170338	0.0199249	MXE	In vs Post
ENSSSCG00000001229	7:22957888-22958064	0.0753051	0.00387983	0.0369459	A5SS	In vs Post
ENSSSCG00000001229	7:22891999-22896292	0.160071	0.00423817	0.0390828	AltEnd	In vs Post
ENSSSCG00000001229	7:22889305-22889361	0.814495	1.16417e-111	2.59133e-107	MXE	Pre vs Post
ENSSSCG00000001229	7:22956420-22956689	0.613705	1.01216e-54	1.73305e-51	Cassette	Pre vs Post
ENSSSCG00000001229	7:22939312-22939401	-0.417405	2.99738e-42	3.51151e-39	MXE	Pre vs Post
ENSSSCG00000001229	7:22870230-22870281	0.379596	1.20568e-30	8.13251e-28	A3SS	Pre vs Post
ENSSSCG00000001229	7:22825330-22825445	0.19547	5.8488e-29	3.42601e-26	Cassette	Pre vs Post
ENSSSCG00000001229	7:22824947-22825103	0.379982	2.30548e-27	1.1156e-24	A5SS	Pre vs Post
ENSSSCG00000001229	7:22940107-22940165	0.35192	2.8606e-21	8.37817e-19	Cassette	Pre vs Post
ENSSSCG00000001229	7:22869887-22869934	-0.445502	2.02955e-20	5.1926e-18	MXE	Pre vs Post
ENSSSCG00000001229	7:22959220-22959300	-0.47702	2.63016e-20	6.43014e-18	AltEnd	Pre vs Post
ENSSSCG00000001229	7:22826215-22826274	-0.184248	9.13848e-16	1.3295e-13	Cassette	Pre vs Post
ENSSSCG00000001229	7:22958815-22958923	0.144716	2.19452e-13	2.37126e-11	Cassette_multi	Pre vs Post
ENSSSCG00000001229	7:22941169-22941215	-0.113887	6.00329e-12	5.1995e-10	Cassette	Pre vs Post
ENSSSCG00000001229	7:22920060-22920196	-0.0834623	1.30016e-11	1.01902e-09	Cassette	Pre vs Post
ENSSSCG00000001229	7:22869876-22869886	-0.213292	6.0296e-08	2.05533e-06	MXE	Pre vs Post
ENSSSCG00000001229	7:22826663-22826720	0.0505242	3.81821e-07	1.0441e-05	A5SS	Pre vs Post
ENSSSCG00000001229	7:22957032-22957122	0.281216	2.19637e-06	4.64725e-05	A3SS	Pre vs Post
ENSSSCG00000001229	7:22938701-22938970	-0.217858	1.71853e-05	0.000272649	MXE	Pre vs Post
ENSSSCG00000001229	7:22890659-22890961	0.162312	7.51469e-05	0.000923631	Cassette	Pre vs Post
ENSSSCG00000001229	7:22957830-22957889	-0.0841743	8.74388e-05	0.00104978	A3SS	Pre vs Post
ENSSSCG00000001229	7:22853630-22853686	0.353744	0.00054215	0.00459023	A3SS	Pre vs Post
ENSSSCG00000001229	7:22956159-22956239	0.101472	0.000599415	0.00495999	AltStart	Pre vs Post
ENSSSCG00000001229	7:22854565-22854645	0.0369182	0.0018053	0.0117739	AltEnd	Pre vs Post
ENSSSCG00000001229	7:22940166-22940238	0.0588891	0.00395637	0.0215002	A3SS	Pre vs Post
ENSSSCG00000001229	7:22941513-22945277	0.0907674	0.00408559	0.0220946	AltEnd	Pre vs Post
ENSSSCG00000001229	7:22891999-22896292	0.00863308	0.00575973	0.0286494	AltEnd	Pre vs Post
ENSSSCG00000001229	7:22940460-22940570	0.0774661	0.0061608	0.0300863	MXE	Pre vs Post
ENSSSCG00000001229	7:22869000-22869080	0.00317734	0.0120718	0.0498859	AltEnd	Pre vs Post
ENSSSCG00000001341	7:23015355-23015415	0.0335816	4.5923e-09	7.70441e-07	AltStart	Pre vs In
ENSSSCG00000001341	7:23023513-23023608	0.274513	6.19279e-09	9.93635e-07	Cassette_multi	Pre vs In
ENSSSCG00000001341	7:23023513-23023608	-0.269733	1.26853e-08	7.58314e-07	Cassette	In vs Post
ENSSSCG00000001341	7:23004633-23004967	-0.461538	0.000165702	0.00304975	AltEnd	In vs Post
ENSSSCG00000001341	7:23015355-23015415	-0.0585281	0.000363498	0.00579143	AltStart	In vs Post
ENSSSCG00000001341	7:23015355-23015415	-0.0435074	2.09496e-06	4.45384e-05	AltStart	Pre vs Post
ENSSSCG00000001341	7:23004633-23004967	-0.264706	8.88371e-05	0.00106199	AltEnd	Pre vs Post
ENSSSCG00000001341	7:23023513-23023608	-3.89833e-05	0.000188465	0.00195847	Cassette	Pre vs Post
ENSSSCG00000001341	7:23022971-23023096	0.0608197	0.000357754	0.00327571	Cassette	Pre vs Post
ENSSSCG00000001341	7:23015219-23015299	0.0182955	0.0111915	0.0471265	AltStart	Pre vs Post
ENSSSCG00000001455	7:24901388-24901774	-0.592256	4.63948e-09	7.72143e-07	MXE	Pre vs In
ENSSSCG00000001455	7:24901730-24901750	0.161644	3.7311e-26	1.59132e-23	Cassette	In vs Post
ENSSSCG00000001455	7:24887221-24887301	-0.311893	3.49352e-25	1.4348e-22	AltEnd	In vs Post
ENSSSCG00000001455	7:24887221-24887301	-0.30469	3.31524e-21	9.58364e-19	AltEnd	Pre vs Post
ENSSSCG00000001455	7:24901396-24901750	0.260581	3.60958e-07	9.98083e-06	AltEnd	Pre vs Post
ENSSSCG00000001779	7:48978997-48979076	0.135827	6.83568e-05	0.00322863	AltStart	Pre vs In
ENSSSCG00000001779	7:49010454-49010575	0.0940126	7.91882e-05	0.00166153	Cassette	In vs Post
ENSSSCG00000001779	7:48978997-48979076	0.17681	4.78844e-13	4.9118e-11	AltStart	Pre vs Post
ENSSSCG00000001779	7:49003354-49003910	0.105377	1.50704e-09	7.67625e-08	Cassette	Pre vs Post
ENSSSCG00000001779	7:49010454-49010575	0.152419	3.07438e-09	1.44985e-07	Cassette	Pre vs Post
ENSSSCG00000002743	6:14882195-14882599	0.0948886	0.00184384	0.0403623	AltStart	Pre vs In
ENSSSCG00000002743	6:14882195-14882599	-0.106625	7.12859e-07	2.84861e-05	AltStart	In vs Post
ENSSSCG00000002743	6:14895874-14896084	0.0887297	4.09726e-05	0.000564013	IR	Pre vs Post
ENSSSCG00000002743	6:14896031-14896082	-0.583333	0.00257659	0.0155511	A3SS	Pre vs Post
ENSSSCG00000002743	6:14901002-14903670	0.00661509	0.00283841	0.016732	A3SS	Pre vs Post
ENSSSCG00000003771	6:135289472-135289534	-0.168844	4.24356e-06	0.000324788	Cassette	Pre vs In
ENSSSCG00000003771	6:135289472-135290334	0.0553172	0.00430165	0.0395367	A3SS	In vs Post
ENSSSCG00000003771	6:135289472-135289534	-0.100791	0.00113855	0.00822024	Cassette	Pre vs Post
ENSSSCG00000003771	6:135313598-135313971	0.190318	0.00659739	0.0317653	IR	Pre vs Post
ENSSSCG00000004081	1:13715672-13715895	0.0870872	0.000412196	0.0138086	AltStart	Pre vs In
ENSSSCG00000004081	1:13828325-13828405	0.0189732	0.00102488	0.0272751	AltEnd	Pre vs In
ENSSSCG00000004081	1:13970495-13970650	0.0965597	6.7244e-05	0.00145213	Cassette	In vs Post
ENSSSCG00000004081	1:13855410-13855460	-0.048625	0.00125207	0.0156618	Cassette	In vs Post
ENSSSCG00000004081	1:13715672-13715895	0.144468	3.63368e-08	1.31516e-06	AltStart	Pre vs Post
ENSSSCG00000004081	1:13970495-13970650	0.114414	9.46779e-07	2.21137e-05	Cassette	Pre vs Post
ENSSSCG00000004081	1:13855410-13855460	-0.058198	0.000167973	0.00179066	Cassette	Pre vs Post
ENSSSCG00000004207	1:33805517-33805528	0.181694	3.28252e-08	4.38457e-06	Cassette	Pre vs In
ENSSSCG00000004207	1:33805517-33805528	-0.156565	0.000100219	0.00203167	Cassette	In vs Post
ENSSSCG00000004207	1:33805517-33807026	0.0374104	0.00386394	0.0211372	Cassette	Pre vs Post
ENSSSCG00000005092	1:189937272-189937352	-0.304255	0.000423836	0.0141308	AltEnd	Pre vs In
ENSSSCG00000005092	1:189937272-189937352	0.336074	1.75785e-07	8.25967e-06	AltEnd	In vs Post
ENSSSCG00000005092	1:189928773-189928877	0.463069	1.73274e-10	1.09571e-08	Cassette	Pre vs Post
ENSSSCG00000005092	1:189924116-189924531	0.0147059	0.000705169	0.00561989	AltStart	Pre vs Post
ENSSSCG00000005480	1:254114795-254114875	-0.361975	4.35111e-05	0.00235781	AltStart	Pre vs In
ENSSSCG00000005480	1:254114795-254114875	-0.417379	6.57445e-07	2.67048e-05	AltStart	In vs Post
ENSSSCG00000005480	1:254114795-254114875	-0.779354	1.94294e-22	6.09124e-20	AltStart	Pre vs Post
ENSSSCG00000005959	4:10585177-10585195	-0.0837463	0.00132332	0.0323833	Cassette	Pre vs In
ENSSSCG00000005959	4:10608733-10608815	0.0951923	4.96586e-06	0.000157784	MXE	In vs Post
ENSSSCG00000005959	4:10606811-10608815	0.0872404	5.01549e-05	0.000668101	Cassette	Pre vs Post
ENSSSCG00000005959	4:10585177-10585195	-0.0688975	6.44751e-05	0.000818683	Cassette	Pre vs Post
ENSSSCG00000006109	4:42963983-42964098	0.0726339	0.000206588	0.00808276	MXE	Pre vs In
ENSSSCG00000006109	4:42959015-42959224	0.147963	0.000504862	0.00757567	AltEnd	In vs Post
ENSSSCG00000006109	4:42959015-42961061	0.0544676	0.00069484	0.00555547	AltEnd	Pre vs Post
ENSSSCG00000006719	4:101565511-101565552	0.766667	1.33978e-23	1.22159e-20	IR	Pre vs In
ENSSSCG00000006719	4:101565511-101565552	-0.59128	5.27863e-25	2.05385e-22	IR	In vs Post
ENSSSCG00000006719	4:101570694-101571536	-0.00168173	5.04835e-05	0.00114467	Cassette_multi	In vs Post
ENSSSCG00000006719	4:101565511-101565552	0.175386	0.000249444	0.00243908	IR	Pre vs Post
ENSSSCG00000006719	4:101573558-101573626	0.1187	0.000827935	0.0063923	A3SS	Pre vs Post
ENSSSCG00000007080	17:25144269-25144300	0.0737188	4.67275e-05	0.00248419	A5SS	Pre vs In
ENSSSCG00000007080	17:25081197-25081277	0.0621589	0.00011839	0.00520038	AltStart	Pre vs In
ENSSSCG00000007080	17:25025116-25030862	0.0577405	0.0018944	0.0411683	A5SS	Pre vs In
ENSSSCG00000007080	17:24978178-24978258	-0.207607	3.26855e-08	1.81679e-06	AltEnd	In vs Post
ENSSSCG00000007080	17:24978178-24978258	-0.17829	7.98092e-07	1.91585e-05	AltEnd	Pre vs Post
ENSSSCG00000007080	17:25069171-25080893	0.0169159	0.000425408	0.0037824	Cassette	Pre vs Post
ENSSSCG00000007080	17:25081197-25081277	0.0560677	0.000830997	0.00640705	AltStart	Pre vs Post
ENSSSCG00000007080	17:25006535-25006615	0.0242915	0.00833153	0.0377318	AltEnd	Pre vs Post
ENSSSCG00000008576	3:113470825-113470878	0.337644	0.000241006	0.00897716	Cassette	Pre vs In
ENSSSCG00000008576	3:113268078-113268184	-0.350884	4.64062e-06	0.000149375	Cassette	In vs Post
ENSSSCG00000008576	3:113268078-113268184	-0.343915	5.5306e-06	0.00010174	Cassette	Pre vs Post
ENSSSCG00000009633	14:7273581-7273676	0.500975	6.77197e-05	0.00321301	MXE	Pre vs In
ENSSSCG00000009633	14:7350898-7350978	0.164277	5.62712e-08	2.96433e-06	AltStart	In vs Post
ENSSSCG00000009633	14:7291412-7291998	0.175192	2.72499e-07	1.22338e-05	AltStart	In vs Post
ENSSSCG00000009633	14:7278929-7291998	0.147478	7.26436e-07	2.89244e-05	AltStart	In vs Post
ENSSSCG00000009633	14:7350126-7350206	0.0440183	0.000170142	0.00311081	AltStart	In vs Post
ENSSSCG00000009633	14:7273581-7274890	-0.178535	0.00405021	0.0379491	MXE	In vs Post
ENSSSCG00000009633	14:7352667-7352747	0.10582	8.73234e-09	3.66742e-07	AltStart	Pre vs Post
ENSSSCG00000009633	14:7278929-7291998	0.0912435	3.2224e-08	1.17779e-06	AltStart	Pre vs Post
ENSSSCG00000009633	14:7291412-7291998	0.140671	8.99294e-07	2.11377e-05	AltStart	Pre vs Post
ENSSSCG00000009633	14:7351424-7351504	0.0389629	0.00102859	0.00756718	AltStart	Pre vs Post
ENSSSCG00000009633	14:7350126-7350206	0.0211357	0.00127213	0.00895807	AltStart	Pre vs Post
ENSSSCG00000010212	14:63706707-63706921	0.158299	0.00158132	0.0366429	AltStart	Pre vs In
ENSSSCG00000010212	14:63538567-63538620	-0.570184	8.49243e-21	2.29689e-18	Cassette	In vs Post
ENSSSCG00000010212	14:63556483-63556545	0.355488	1.39655e-11	1.36443e-09	MXE	In vs Post
ENSSSCG00000010212	14:63706509-63706589	0.193334	4.96104e-05	0.00112847	AltStart	In vs Post
ENSSSCG00000010212	14:63706707-63706921	-0.201581	0.00013144	0.00251734	AltStart	In vs Post
ENSSSCG00000010212	14:63445603-63445883	0.198571	0.00406863	0.0380735	IR	In vs Post
ENSSSCG00000010212	14:63531664-63532190	0.0588235	0.00477568	0.0425703	AltStart	In vs Post
ENSSSCG00000010212	14:63556483-63556545	0.161233	1.51206e-09	7.68423e-08	Cassette	Pre vs Post
ENSSSCG00000010212	14:63445603-63445883	0.29144	2.89562e-06	5.88617e-05	IR	Pre vs Post
ENSSSCG00000010212	14:63546598-63546678	0.190141	3.68638e-05	0.00051868	AltStart	Pre vs Post
ENSSSCG00000010734	14:133825924-133826047	0.0951243	0.000463842	0.0151685	Cassette	Pre vs In
ENSSSCG00000010734	14:133825924-133826047	-0.0683121	0.00527179	0.0456606	Cassette	In vs Post
ENSSSCG00000010734	14:133829334-133830373	-0.0092504	0.000100692	0.00117839	A5SS	Pre vs Post
AKR1C2	10:65570798-65571013	0.287243	0.000296722	0.0105826	MXE	Pre vs In
AKR1C2	10:65568499-65568630	-0.818182	0.00212673	0.0449593	A5SS	Pre vs In
AKR1C2	10:65563875-65564705	-0.00274474	0.00224511	0.0464321	A5SS	Pre vs In
AKR1C2	10:65592701-65592760	0.222222	6.67455e-13	7.9585e-11	MXE	In vs Post
AKR1C2	10:65594619-65595002	-0.192726	4.7459e-08	2.54238e-06	AltEnd	In vs Post
AKR1C2	10:65566666-65566775	0.122914	6.67637e-08	3.47579e-06	Cassette	In vs Post
AKR1C2	10:65565811-65565855	-0.764706	0.000192927	0.0034506	A3SS	In vs Post
AKR1C2	10:65572686-65574571	-0.026323	0.000704491	0.00988248	AltEnd	In vs Post
AKR1C2	10:65570557-65570738	0.00654237	0.00240319	0.0260244	MXE	In vs Post
AKR1C2	10:65592592-65592701	-0.0705183	1.19242e-14	1.51669e-12	A3SS	Pre vs Post
AKR1C2	10:65593008-65593333	-0.358491	9.87266e-08	3.15288e-06	A3SS	Pre vs Post
AKR1C2	10:65570557-65570630	0.0175	4.03384e-05	0.000557698	MXE	Pre vs Post
AKR1C2	10:65566666-65566775	0.0803345	0.00157107	0.0105524	Cassette	Pre vs Post
AKR1C2	10:65576411-65576491	-0.0483368	0.00711506	0.0336679	AltEnd	Pre vs Post
ENSSSCG00000012508	X:83181725-83181802	0.759602	1.03861e-06	9.8555e-05	Cassette	Pre vs In
ENSSSCG00000012508	X:83181725-83181802	-0.405606	0.00483993	0.0430048	Cassette	In vs Post
ENSSSCG00000012508	X:83181725-83181802	0.353995	0.000617972	0.0050702	Cassette	Pre vs Post
ENSSSCG00000016687	18:43249182-43249262	0.3125	4.98957e-05	0.00260289	AltStart	Pre vs In
ENSSSCG00000016687	18:43442089-43442169	0.340909	0.000536968	0.00794985	AltStart	In vs Post
ENSSSCG00000016687	18:43249182-43249262	0.285473	1.87872e-05	0.000294496	AltStart	Pre vs Post
ENSSSCG00000016711	18:46202019-46203078	0.0123757	0.000735214	0.0212079	A5SS	Pre vs In
ENSSSCG00000016711	18:46204297-46204377	0.291124	4.73552e-05	0.00108834	AltStart	In vs Post
ENSSSCG00000016711	18:46203677-46203757	-0.12405	0.00483045	0.042955	AltStart	In vs Post
ENSSSCG00000016711	18:46202019-46203129	0.00374785	0.000251087	0.00245237	Cassette	Pre vs Post
ENSSSCG00000016711	18:46200833-46201836	0.014104	0.000952578	0.0071209	A3SS	Pre vs Post
ENSSSCG00000016711	18:46203677-46203757	-0.140955	0.00303086	0.0175596	AltStart	Pre vs Post
ENSSSCG00000016711	18:46204297-46204377	0.212469	0.00768465	0.0355976	AltStart	Pre vs Post
ENSSSCG00000021322	X:20221414-20221501	-0.277778	0.000277138	0.01009	AltStart	Pre vs In
ENSSSCG00000021322	X:20221414-20221501	0.144928	0.00492601	0.0435602	AltStart	In vs Post
ENSSSCG00000021322	X:20234460-20243402	0.192308	7.25326e-05	0.000899945	A3SS	Pre vs Post
ENSSSCG00000021322	X:20234046-20234126	0.217391	0.000356657	0.003267	AltStart	Pre vs Post
NT5C3A	18:40463168-40463263	0.272727	0.00229529	0.0472893	Cassette	Pre vs In
NT5C3A	18:40462405-40462485	-0.249854	0.0014086	0.0171309	AltStart	In vs Post
NT5C3A	18:40463168-40463263	-0.310345	0.00384173	0.0366775	Cassette	In vs Post
NT5C3A	18:40462405-40462485	-0.273214	0.00122509	0.00870389	AltStart	Pre vs Post
NT5C3A	18:40463168-40463263	-0.0376176	0.00668332	0.0320681	Cassette	Pre vs Post
ENSSSCG00000022925	5:62975304-62975579	-0.0369231	6.68542e-05	0.00318636	AltStart	Pre vs In
ENSSSCG00000022925	5:62975304-62975579	-0.0283187	3.44876e-05	0.000834165	AltStart	In vs Post
ENSSSCG00000022925	5:62975304-62975579	-0.0652418	8.05657e-19	1.587e-16	AltStart	Pre vs Post
ENSSSCG00000023611	7:24112969-24113049	-0.116454	5.45772e-07	5.69422e-05	AltEnd	Pre vs In
ENSSSCG00000023611	7:24131236-24131339	-0.201031	0.000146856	0.00619661	A5SS	Pre vs In
ENSSSCG00000023611	7:24112723-24112825	1	2.76757e-07	1.23998e-05	MXE	In vs Post
ENSSSCG00000023611	7:24097744-24097772	-0.246381	3.29701e-05	0.000801766	IR	In vs Post
ENSSSCG00000023611	7:24113556-24113633	0.53662	0.000362709	0.00578717	MXE	In vs Post
ENSSSCG00000023611	7:24101394-24101587	0.369409	0.000494471	0.00745093	Cassette	In vs Post
ENSSSCG00000023611	7:24097579-24097609	0.380267	0.00347157	0.0341733	A3SS	In vs Post
ENSSSCG00000023611	7:24112723-24112825	1	7.46342e-07	1.80574e-05	MXE	Pre vs Post
ENSSSCG00000023611	7:24112969-24113049	-0.202325	3.77703e-06	7.29291e-05	AltEnd	Pre vs Post
ENSSSCG00000023611	7:24120219-24126796	-0.802848	0.000435183	0.00384394	MXE	Pre vs Post
ENSSSCG00000023611	7:24097579-24097609	0.379595	0.000770336	0.0060334	A3SS	Pre vs Post
ENSSSCG00000023611	7:24120219-24120542	-0.802848	0.00227082	0.0140679	MXE	Pre vs Post
ENSSSCG00000027675	13:52888528-52888608	0.0597403	1.38321e-05	0.000912179	AltStart	Pre vs In
ENSSSCG00000027675	13:52874073-52874139	-0.0552883	0.000888083	0.0245469	Cassette	Pre vs In
ENSSSCG00000027675	13:52457062-52457142	-0.139692	0.000745715	0.0103172	AltStart	In vs Post
ENSSSCG00000027675	13:52457062-52457180	-0.198659	4.34502e-08	1.54006e-06	AltStart	Pre vs Post
ENSSSCG00000027675	13:52888528-52888608	0.0529375	0.00724656	0.0341161	AltStart	Pre vs Post
ENSSSCG00000029125	2:140054526-140054855	0.204443	0.000243152	0.00902504	AltStart	Pre vs In
ENSSSCG00000029125	2:140054526-140054855	-0.209146	8.59155e-06	0.000256107	AltStart	In vs Post
ENSSSCG00000029125	2:139976112-139976177	0.140374	9.78075e-06	0.000168898	Cassette	Pre vs Post
ENSSSCG00000029125	2:140025867-140025962	0.0924202	0.00448215	0.0236698	Cassette	Pre vs Post
ENSSSCG00000035538	4:40403974-40404045	-0.0554218	0.00222457	0.0463272	Cassette	Pre vs In
ENSSSCG00000035538	4:40406454-40406525	-0.656863	0.000235807	0.00406666	MXE	In vs Post
ENSSSCG00000035538	4:40403974-40404045	-0.0357132	0.00772937	0.0357688	Cassette	Pre vs Post
ENSSSCG00000036622	4:92717868-92717982	0.0501792	0.00244598	0.0492271	Cassette	Pre vs In
ENSSSCG00000036622	4:92717868-92717982	-0.0445031	0.000258717	0.00438672	Cassette	In vs Post
ENSSSCG00000036622	4:92725855-92725919	-0.0384154	0.00029622	0.00281176	Cassette	Pre vs Post
ENSSSCG00000036669	2:9200982-9201043	0.911392	2.31879e-72	1.62091e-68	MXE	Pre vs In
ENSSSCG00000036669	2:9205817-9205879	-0.616783	2.21681e-54	7.74811e-51	MXE	Pre vs In
ENSSSCG00000036669	2:9211651-9211692	-1	2.34841e-43	6.15607e-40	MXE	Pre vs In
ENSSSCG00000036669	2:9201775-9201811	0.640408	5.98784e-42	1.3088e-38	A5SS	Pre vs In
ENSSSCG00000036669	2:9205418-9205432	0.411316	2.72491e-40	4.3957e-37	Cassette	Pre vs In
ENSSSCG00000036669	2:9211693-9211746	0.361617	3.83687e-26	4.2349e-23	Cassette	Pre vs In
ENSSSCG00000036669	2:9207146-9207160	1	7.82033e-26	8.2e-23	A5SS	Pre vs In
ENSSSCG00000036669	2:9200929-9200946	0.274397	1.06089e-23	1.01127e-20	A5SS	Pre vs In
ENSSSCG00000036669	2:9201331-9201391	0.441564	1.64304e-23	1.43567e-20	Cassette	Pre vs In
ENSSSCG00000036669	2:9211636-9211650	-0.451825	4.62274e-19	2.93768e-16	MXE	Pre vs In
ENSSSCG00000036669	2:9210145-9210180	0.448161	1.35904e-18	8.14298e-16	MXE	Pre vs In
ENSSSCG00000036669	2:9201642-9201697	0.867538	9.25575e-16	4.12984e-13	MXE	Pre vs In
ENSSSCG00000036669	2:9203456-9203864	0.921948	1.37566e-15	5.90752e-13	MXE	Pre vs In
ENSSSCG00000036669	2:9211370-9211458	0.201499	1.38033e-15	5.90752e-13	Cassette	Pre vs In
ENSSSCG00000036669	2:9203024-9203071	0.579444	2.10274e-15	8.64638e-13	MXE	Pre vs In
ENSSSCG00000036669	2:9203408-9203455	-0.287887	1.99372e-14	7.33516e-12	Cassette	Pre vs In
ENSSSCG00000036669	2:9205496-9205544	-0.216066	1.43942e-11	3.97186e-09	Cassette	Pre vs In
ENSSSCG00000036669	2:9200597-9200659	0.1098	1.84613e-11	4.90065e-09	A5SS	Pre vs In
ENSSSCG00000036669	2:9209413-9209446	1	1.97453e-11	5.17598e-09	MXE	Pre vs In
ENSSSCG00000036669	2:9210979-9211026	-1	2.73893e-11	6.92025e-09	MXE	Pre vs In
ENSSSCG00000036669	2:9209891-9209970	0.17099	2.24779e-10	4.76146e-08	Cassette	Pre vs In
ENSSSCG00000036669	2:9212305-9212385	0.206453	3.13309e-10	6.44157e-08	AltEnd	Pre vs In
ENSSSCG00000036669	2:9209761-9209796	-0.43839	1.22578e-08	1.81026e-06	Cassette	Pre vs In
ENSSSCG00000036669	2:9211322-9211362	-0.210046	1.75566e-08	2.48769e-06	MXE	Pre vs In
ENSSSCG00000036669	2:9209497-9209532	-0.394185	3.67793e-08	4.85093e-06	MXE	Pre vs In
ENSSSCG00000036669	2:9206863-9206904	-0.272403	3.93256e-08	5.12678e-06	A5SS	Pre vs In
ENSSSCG00000036669	2:9209824-9209874	-0.42047	9.34237e-08	1.13248e-05	MXE	Pre vs In
ENSSSCG00000036669	2:9202082-9202096	0.528566	1.37476e-07	1.61967e-05	Cassette	Pre vs In
ENSSSCG00000036669	2:9200219-9200497	0.6028	5.37432e-07	5.63524e-05	Cassette	Pre vs In
ENSSSCG00000036669	2:9210181-9210215	-0.102593	8.60198e-06	0.000601307	A3SS	Pre vs In
ENSSSCG00000036669	2:9202688-9202801	-0.175966	9.89043e-06	0.000677818	Cassette	Pre vs In
ENSSSCG00000036669	2:9208478-9208818	-0.210626	3.32554e-05	0.00190546	MXE	Pre vs In
ENSSSCG00000036669	2:9201396-9201601	0.203485	3.80256e-05	0.00210962	Cassette	Pre vs In
ENSSSCG00000036669	2:9209971-9210066	0.128362	0.000114415	0.00504075	MXE	Pre vs In
ENSSSCG00000036669	2:9209177-9209298	0.267326	0.000123966	0.00536079	MXE	Pre vs In
ENSSSCG00000036669	2:9206803-9206856	0.147213	0.000293793	0.0105155	MXE	Pre vs In
ENSSSCG00000036669	2:9211303-9211314	0.211165	0.000334339	0.0117052	Cassette	Pre vs In
ENSSSCG00000036669	2:9208423-9208436	-0.0946912	0.00142439	0.0342163	A3SS	Pre vs In
ENSSSCG00000036669	2:9207940-9208386	-0.207699	0.00194462	0.0419553	Cassette	Pre vs In
ENSSSCG00000036669	2:9211651-9211692	0.653398	1.10698e-50	1.88851e-47	MXE	In vs Post
ENSSSCG00000036669	2:9200545-9200597	0.979389	4.2877e-42	5.00487e-39	Cassette	In vs Post
ENSSSCG00000036669	2:9201642-9201697	-0.976153	6.21476e-35	4.9231e-32	MXE	In vs Post
ENSSSCG00000036669	2:9209796-9209874	0.532948	1.08725e-33	7.53529e-31	A5SS	In vs Post
ENSSSCG00000036669	2:9210883-9210924	-0.519201	8.50775e-31	5.39099e-28	MXE	In vs Post
ENSSSCG00000036669	2:9210937-9210978	0.460357	1.58655e-29	9.2596e-27	A5SS	In vs Post
ENSSSCG00000036669	2:9208852-9208914	1	2.82167e-29	1.52631e-26	MXE	In vs Post
ENSSSCG00000036669	2:9201266-9201331	0.353659	3.4525e-29	1.82308e-26	A3SS	In vs Post
ENSSSCG00000036669	2:9212461-9212541	0.902703	1.19757e-28	6.17667e-26	AltEnd	In vs Post
ENSSSCG00000036669	2:9209971-9210018	-1	2.24702e-26	9.77146e-24	MXE	In vs Post
ENSSSCG00000036669	2:9211322-9211362	-0.439375	8.22488e-24	3.04019e-21	Cassette	In vs Post
ENSSSCG00000036669	2:9207146-9207160	-0.912281	6.391e-23	2.08441e-20	A5SS	In vs Post
ENSSSCG00000036669	2:9211747-9211794	-0.386098	1.81457e-22	5.6681e-20	MXE	In vs Post
ENSSSCG00000036669	2:9211075-9211188	-0.443497	5.93235e-20	1.47829e-17	Cassette	In vs Post
ENSSSCG00000036669	2:9206857-9206904	0.9821	1.04203e-19	2.51197e-17	MXE	In vs Post
ENSSSCG00000036669	2:9204215-9204262	-0.655516	2.76953e-16	5.11855e-14	MXE	In vs Post
ENSSSCG00000036669	2:9199826-9199897	-1	6.62708e-16	1.1758e-13	MXE	In vs Post
ENSSSCG00000036669	2:9203471-9203472	1	1.18072e-15	2.01431e-13	MXE	In vs Post
ENSSSCG00000036669	2:9201775-9201811	-0.316821	4.28865e-15	6.55957e-13	A5SS	In vs Post
ENSSSCG00000036669	2:9210986-9211074	0.465252	1.90514e-14	2.6742e-12	MXE	In vs Post
ENSSSCG00000036669	2:9205370-9205495	0.514489	3.33419e-14	4.59289e-12	MXE	In vs Post
ENSSSCG00000036669	2:9208915-9209028	-0.840209	4.2032e-14	5.75424e-12	MXE	In vs Post
ENSSSCG00000036669	2:9209891-9209937	-0.312746	7.5861e-13	8.94161e-11	Cassette	In vs Post
ENSSSCG00000036669	2:9202740-9202801	0.218272	1.90457e-11	1.81285e-09	Cassette	In vs Post
ENSSSCG00000036669	2:9202640-9202717	-0.523017	2.76319e-11	2.5641e-09	MXE	In vs Post
ENSSSCG00000036669	2:9205880-9205915	0.877287	2.08461e-10	1.72509e-08	A3SS	In vs Post
ENSSSCG00000036669	2:9200982-9201043	0.190134	4.25902e-09	2.77814e-07	Cassette	In vs Post
ENSSSCG00000036669	2:9201396-9201601	-0.180408	1.13522e-08	6.86018e-07	Cassette	In vs Post
ENSSSCG00000036669	2:9206298-9206353	0.220298	1.50146e-08	8.85869e-07	A5SS	In vs Post
ENSSSCG00000036669	2:9209594-9209635	0.172683	1.54337e-08	9.07926e-07	A3SS	In vs Post
ENSSSCG00000036669	2:9203024-9203071	-0.245104	5.4547e-08	2.88034e-06	MXE	In vs Post
ENSSSCG00000036669	2:9201044-9201070	-0.102494	1.11471e-07	5.50604e-06	MXE	In vs Post
ENSSSCG00000036669	2:9210979-9210985	-0.0955312	1.4751e-07	7.08112e-06	MXE	In vs Post
ENSSSCG00000036669	2:9202082-9202096	-0.464885	2.59803e-07	1.17112e-05	Cassette	In vs Post
ENSSSCG00000036669	2:9206830-9206856	-0.140524	5.60609e-07	2.33268e-05	A5SS	In vs Post
ENSSSCG00000036669	2:9209586-9209593	-0.0642476	1.26141e-06	4.70968e-05	A5SS	In vs Post
ENSSSCG00000036669	2:9212305-9212385	-0.142121	1.05409e-05	0.000303606	AltEnd	In vs Post
ENSSSCG00000036669	2:9211636-9211650	0.2113	2.19356e-05	0.000566343	MXE	In vs Post
ENSSSCG00000036669	2:9211309-9211314	-0.268318	4.92042e-05	0.00112153	Cassette	In vs Post
ENSSSCG00000036669	2:9211370-9211411	-0.149308	6.40689e-05	0.00139854	A3SS	In vs Post
ENSSSCG00000036669	2:9203072-9203095	0.18404	7.55967e-05	0.00159904	Cassette	In vs Post
ENSSSCG00000036669	2:9210181-9210214	0.167156	7.87049e-05	0.00165295	Cassette	In vs Post
ENSSSCG00000036669	2:9205517-9205586	0.0992241	0.000248995	0.00424134	Cassette	In vs Post
ENSSSCG00000036669	2:9211693-9211699	0.166419	0.00120091	0.0151846	A3SS	In vs Post
ENSSSCG00000036669	2:9200882-9200959	-0.0774034	0.00377118	0.0362846	Cassette	In vs Post
ENSSSCG00000036669	2:9201642-9201697	0.31795	8.0683e-27	3.59185e-24	Cassette	Pre vs Post
ENSSSCG00000036669	2:9201331-9201391	1	3.06535e-26	1.31215e-23	MXE	Pre vs Post
ENSSSCG00000036669	2:9211322-9211362	-0.290896	2.80423e-23	9.78478e-21	MXE	Pre vs Post
ENSSSCG00000036669	2:9211370-9211458	-0.782453	5.74291e-21	1.61812e-18	MXE	Pre vs Post
ENSSSCG00000036669	2:9201455-9201568	-0.85	6.54001e-20	1.48545e-17	MXE	Pre vs Post
ENSSSCG00000036669	2:9205880-9205969	0.302276	9.84632e-20	2.19169e-17	Cassette	Pre vs Post
ENSSSCG00000036669	2:9210979-9211026	0.233974	1.5468e-19	3.3106e-17	MXE	Pre vs Post
ENSSSCG00000036669	2:9204215-9204262	-0.330076	5.68624e-15	7.67091e-13	MXE	Pre vs Post
ENSSSCG00000036669	2:9211075-9211188	-0.4761	6.74563e-15	8.93756e-13	Cassette	Pre vs Post
ENSSSCG00000036669	2:9211747-9211794	0.235367	7.458e-11	5.03053e-09	Cassette	Pre vs Post
ENSSSCG00000036669	2:9202640-9202766	-0.788535	4.00498e-10	2.30951e-08	A3SS	Pre vs Post
ENSSSCG00000036669	2:9210181-9210214	-1	5.06983e-10	2.87149e-08	MXE	Pre vs Post
ENSSSCG00000036669	2:9210215-9210294	1	7.57811e-10	4.11417e-08	MXE	Pre vs Post
ENSSSCG00000036669	2:9209177-9209298	0.765125	2.06723e-09	1.01131e-07	MXE	Pre vs Post
ENSSSCG00000036669	2:9211651-9211746	0.17831	3.43754e-09	1.59742e-07	Cassette	Pre vs Post
ENSSSCG00000036669	2:9205802-9205879	-0.195783	7.23026e-09	3.10093e-07	MXE	Pre vs Post
ENSSSCG00000036669	2:9209971-9210018	-0.742772	1.26776e-08	5.08453e-07	MXE	Pre vs Post
ENSSSCG00000036669	2:9207067-9207160	0.664854	5.87707e-07	1.47483e-05	MXE	Pre vs Post
ENSSSCG00000036669	2:9205418-9205495	0.588957	8.44374e-07	2.0123e-05	MXE	Pre vs Post
ENSSSCG00000036669	2:9209084-9209109	0.551724	1.5017e-06	3.3161e-05	A3SS	Pre vs Post
ENSSSCG00000036669	2:9205496-9205586	0.272313	1.01117e-05	0.000173939	MXE	Pre vs Post
ENSSSCG00000036669	2:9209413-9209446	0.624277	5.49397e-05	0.000720627	MXE	Pre vs Post
ENSSSCG00000036669	2:9212305-9212385	0.0643317	5.55431e-05	0.00072475	AltEnd	Pre vs Post
ENSSSCG00000036669	2:9201044-9201070	-0.425076	0.000127282	0.00142585	MXE	Pre vs Post
ENSSSCG00000036669	2:9208387-9208818	-0.292197	0.000174918	0.00184789	Cassette	Pre vs Post
ENSSSCG00000036669	2:9209149-9209154	-0.31454	0.000206232	0.00210574	Cassette	Pre vs Post
ENSSSCG00000036669	2:9202082-9202096	0.459198	0.000214591	0.00217513	MXE	Pre vs Post
ENSSSCG00000036669	2:9204263-9205054	0.753086	0.000614048	0.00504544	MXE	Pre vs Post
ENSSSCG00000036669	2:9209797-9209824	-0.439544	0.00107988	0.00786504	A3SS	Pre vs Post
ENSSSCG00000036669	2:9208930-9208993	0.442719	0.00205132	0.0130197	A3SS	Pre vs Post
ENSSSCG00000036669	2:9209533-9209682	0.0989675	0.0042477	0.0226901	Cassette	Pre vs Post
ENSSSCG00000036669	2:9199876-9199897	-0.22347	0.00547093	0.0275263	A5SS	Pre vs Post
ENSSSCG00000036669	2:9210067-9210180	0.136858	0.00944056	0.0413656	MXE	Pre vs Post
ENSSSCG00000036669	2:9207030-9207066	0.0713951	0.0100723	0.0434507	A5SS	Pre vs Post
ENSSSCG00000037775	AEMK02000452.1:3772920-3773000	-0.206269	5.94621e-11	1.41702e-08	AltStart	Pre vs In
ENSSSCG00000037775	AEMK02000452.1:3764262-3764730	-0.165978	5.18786e-10	1.02636e-07	AltEnd	Pre vs In
ENSSSCG00000037775	AEMK02000452.1:3762708-3768152	-0.271933	5.1201e-08	6.628e-06	AltEnd	Pre vs In
ENSSSCG00000037775	AEMK02000452.1:3764261-3767098	-0.255576	1.56444e-07	1.81259e-05	AltEnd	Pre vs In
ENSSSCG00000037775	AEMK02000452.1:3658935-3658970	-0.674055	2.07584e-07	2.35311e-05	MXE	Pre vs In
ENSSSCG00000037775	AEMK02000452.1:3658935-3659435	-0.674055	1.32302e-06	0.00012063	MXE	Pre vs In
ENSSSCG00000037775	AEMK02000452.1:3615403-3615525	-0.194627	0.00017115	0.00695541	A3SS	Pre vs In
ENSSSCG00000037775	AEMK02000452.1:3760640-3760720	-0.0968571	0.00178391	0.0395458	AltEnd	Pre vs In
ENSSSCG00000037775	AEMK02000452.1:3677529-3677564	-0.543128	1.62139e-12	1.82534e-10	Cassette	In vs Post
ENSSSCG00000037775	AEMK02000452.1:3699793-3699829	0.530221	6.01414e-08	3.15323e-06	A5SS	In vs Post
ENSSSCG00000037775	AEMK02000452.1:3659345-3659435	0.463983	0.00025627	0.00434855	A3SS	In vs Post
ENSSSCG00000037775	AEMK02000452.1:3633396-3633476	0.282151	0.00517524	0.0450634	AltEnd	In vs Post
ENSSSCG00000037775	AEMK02000452.1:3762708-3768152	-0.252227	2.29932e-15	3.25991e-13	AltEnd	Pre vs Post
ENSSSCG00000037775	AEMK02000452.1:3760640-3768552	-0.166059	5.46436e-15	7.46204e-13	AltEnd	Pre vs Post
ENSSSCG00000037775	AEMK02000452.1:3772920-3773000	-0.128789	2.18327e-14	2.68494e-12	AltStart	Pre vs Post
ENSSSCG00000037775	AEMK02000452.1:3764261-3767098	-0.200146	7.16727e-14	8.35269e-12	AltEnd	Pre vs Post
ENSSSCG00000037775	AEMK02000452.1:3699043-3699123	0.123444	2.12701e-11	1.61588e-09	AltStart	Pre vs Post
ENSSSCG00000037775	AEMK02000452.1:3659472-3659552	-0.122737	1.90064e-10	1.19173e-08	AltStart	Pre vs Post
ENSSSCG00000037775	AEMK02000452.1:3615403-3615525	-0.258729	1.22437e-08	4.94615e-07	A3SS	Pre vs Post
ENSSSCG00000037775	AEMK02000452.1:3677565-3677682	0.294844	1.28822e-07	4.01605e-06	Cassette	Pre vs Post
ENSSSCG00000037775	AEMK02000452.1:3658935-3659435	0.167776	5.7623e-07	1.45423e-05	MXE	Pre vs Post
ENSSSCG00000037775	AEMK02000452.1:3658935-3658970	0.167776	1.78201e-05	0.000281517	MXE	Pre vs Post
ENSSSCG00000037775	AEMK02000452.1:3699829-3699946	-0.0181881	0.00844124	0.0380554	Cassette	Pre vs Post
ENSSSCG00000037775	AEMK02000452.1:3769084-3769164	-0.0133566	0.0117808	0.0489413	AltStart	Pre vs Post
ENSSSCG00000038506	9:135051375-135051419	-0.0568966	4.30339e-09	7.33711e-07	Cassette	Pre vs In
ENSSSCG00000038506	9:135051375-135051419	-0.444341	3.33625e-64	9.24892e-61	Cassette	In vs Post
ENSSSCG00000038506	9:135051375-135051419	-0.501238	1.39431e-97	1.55179e-93	Cassette	Pre vs Post
ENSSSCG00000038506	9:135033418-135033980	0.212455	0.000362941	0.00331231	IR	Pre vs Post
ENSSSCG00000039854	4:122283634-122284896	0.00349538	0.00142187	0.0341949	Cassette	Pre vs In
ENSSSCG00000039854	4:122293438-122298095	0.285714	4.01229e-09	2.62491e-07	A5SS	In vs Post
ENSSSCG00000039854	4:122280377-122280856	0.366389	1.03372e-07	5.16345e-06	IR	In vs Post
ENSSSCG00000039854	4:122284940-122285178	0.951814	2.78254e-07	1.24418e-05	A5SS	In vs Post
ENSSSCG00000039854	4:122303634-122303992	-0.0186091	0.000753274	0.0103801	Cassette	In vs Post
ENSSSCG00000039854	4:122283634-122283689	0.388889	0.00379936	0.0364299	MXE	In vs Post
ENSSSCG00000039854	4:122293315-122293395	0.00770416	0.00529184	0.0457349	AltEnd	In vs Post
ENSSSCG00000039854	4:122280377-122280856	0.456541	1.21628e-12	1.19265e-10	IR	Pre vs Post
ENSSSCG00000039854	4:122284940-122285178	0.854575	3.06356e-07	8.6428e-06	A5SS	Pre vs Post
ENSSSCG00000039854	4:122293315-122293395	0.0145682	7.13504e-05	0.000889244	AltEnd	Pre vs Post
ENSSSCG00000039854	4:122303429-122303992	-0.0273038	0.000242118	0.00238148	Cassette	Pre vs Post
ENSSSCG00000039854	4:122280856-122280911	-0.0269392	0.00719879	0.0339487	Cassette	Pre vs Post
ENTPD5	7:97263030-97263327	0.143315	5.98795e-05	0.00297567	IR	Pre vs In
ENTPD5	7:97296819-97296853	-0.217863	0.000104769	0.00210467	Cassette	In vs Post
ENTPD5	7:97291135-97291759	0.240595	0.000146429	0.00276618	IR	In vs Post
ENTPD5	7:97316140-97316184	0.229416	0.00465885	0.0417809	AltStart	In vs Post
ENTPD5	7:97263030-97263327	0.186215	2.68139e-07	7.64212e-06	IR	Pre vs Post
ENTPD5	7:97291135-97291759	0.347319	2.56766e-06	5.31661e-05	IR	Pre vs Post
ENTPD5	7:97296819-97296853	-0.260417	0.000207537	0.00211422	Cassette	Pre vs Post
ENTPD5	7:97269217-97269384	0.18287	0.00784104	0.0361395	IR	Pre vs Post
EPB41	6:85989696-85989746	-0.123457	0.000665902	0.0196408	Cassette	Pre vs In
EPB41	6:85865224-85865486	0.442599	1.56537e-09	1.11272e-07	AltStart	In vs Post
EPB41	6:85922219-85922236	0.437747	3.78621e-07	1.62419e-05	A3SS	In vs Post
EPB41	6:85865224-85865486	0.427518	6.13785e-12	5.25471e-10	AltStart	Pre vs Post
EPB41	6:85922219-85922236	0.422666	3.56706e-06	6.95874e-05	A3SS	Pre vs Post
EPB41	6:85989696-85989746	-0.145631	8.86626e-05	0.00106104	Cassette	Pre vs Post
EPB41L2	1:32600281-32600334	0.133776	0.00107341	0.0282441	Cassette_multi	Pre vs In
EPB41L2	1:32600281-32600334	-0.304537	3.1835e-10	2.54887e-08	Cassette_multi	In vs Post
EPB41L2	1:32586183-32586979	0.101834	0.00148167	0.0178783	A5SS	In vs Post
EPB41L2	1:32468281-32468914	0.0588061	0.00205194	0.0231018	AltStart	In vs Post
EPB41L2	1:32587036-32590805	0.0355023	0.0028167	0.0294248	Cassette	In vs Post
EPB41L2	1:32586183-32586979	0.120579	5.06604e-08	1.76195e-06	A5SS	Pre vs Post
EPB41L2	1:32587036-32590805	0.0311536	3.14696e-06	6.29351e-05	Cassette	Pre vs Post
EPB41L2	1:32600281-32600334	-0.170761	0.000724763	0.00574724	Cassette_multi	Pre vs Post
ETNK1	5:50935466-50938923	-0.0140836	9.03599e-05	0.0041284	A5SS	Pre vs In
ETNK1	5:50935466-50938923	0.0424305	4.74428e-08	2.54238e-06	A5SS	In vs Post
ETNK1	5:50929759-50935408	0.0440628	3.12022e-06	0.000104849	A3SS	In vs Post
ETNK1	5:50935466-50938923	0.028347	2.25579e-20	5.64176e-18	A5SS	Pre vs Post
EXOC6	14:104342200-104342411	-0.31005	0.000615272	0.018592	AltStart	Pre vs In
EXOC6	14:104342200-104342411	-0.281732	2.83266e-08	1.59439e-06	AltStart	In vs Post
EXOC6	14:104342200-104342411	-0.591781	1.32873e-18	2.5944e-16	AltStart	Pre vs Post
FAM172A	2:100671807-100671887	-0.0633484	0.000271354	0.00993796	AltStart	Pre vs In
FAM172A	2:100477779-100483859	-0.00653595	0.0005355	0.00794367	AltEnd	In vs Post
FAM172A	2:100890397-100890615	0.128469	0.000868147	0.011676	Cassette	In vs Post
FAM172A	2:100671807-100671887	-0.0504202	0.00262729	0.0157503	AltStart	Pre vs Post
FAM172A	2:100477779-100483859	-0.0111111	0.00627726	0.0305219	AltEnd	Pre vs Post
FAM172A	2:100890397-100890615	0.0226485	0.00989724	0.0428604	Cassette	Pre vs Post
FAM53B	14:134002502-134002537	0.767123	0.000591826	0.0180658	IR	Pre vs In
FAM53B	14:134154506-134154604	0.195183	0.00057908	0.00841601	AltStart	In vs Post
FAM53B	14:134011044-134011124	-0.120879	0.00393591	0.0372877	AltStart	In vs Post
FAM53B	14:134154506-134154604	0.241981	4.26974e-06	8.07479e-05	AltStart	Pre vs Post
FAM53B	14:134011044-134011124	-0.120879	5.23773e-05	0.00069232	AltStart	Pre vs Post
FAM53B	14:134062655-134062735	0.0341297	0.0118587	0.0491552	AltStart	Pre vs Post
FAR1	2:45599157-45599237	0.0729265	0.000373506	0.0127549	AltStart	Pre vs In
FAR1	2:45550592-45551357	0.277311	6.74849e-06	0.000207584	A5SS	In vs Post
FAR1	2:45550592-45551357	0.53164	6.58096e-07	1.61684e-05	A5SS	Pre vs Post
FAT1	17:8578035-8578070	-0.225526	0.00143293	0.034357	Cassette	Pre vs In
FAT1	17:8457187-8457414	32::446	0.0960756	0.00316554	0.0588108	Cassette
FAT1	17:8452017-8452097	0.114817	0.00056479	0.00825159	AltStart	In vs Post
FAT1	17:8452017-8452097	0.142312	0.000509664	0.00436499	AltStart	Pre vs Post
FBXO25	15:32402318-32402344	-0.147674	0.000132764	0.00568653	Cassette	Pre vs In
FBXO25	15:32402318-32402344	0.158884	1.87941e-07	8.77508e-06	Cassette	In vs Post
FBXO25	15:32366341-32366675	0.356923	1.36476e-06	3.05308e-05	Cassette	Pre vs Post
FGF12	13:129502298-129503834	0.221429	0.000626605	0.0188538	AltStart	Pre vs In
FGF12	13:129631833-129631913	-0.928571	1.27216e-08	7.58439e-07	AltStart	In vs Post
FGF12	13:129626607-129626983	0.4	0.000925333	0.0122374	IR	In vs Post
FGF12	13:129502298-129503834	0.625034	3.82452e-09	1.76253e-07	AltStart	Pre vs Post
FHL1	X:111365850-111366049	0.0789478	0.00179001	0.0395615	Cassette	Pre vs In
FHL1	X:111310995-111311144	-0.161825	0.000152549	0.00285626	AltStart	In vs Post
FHL1	X:111365850-111366049	0.0537804	0.00143948	0.0174357	Cassette	In vs Post
FHL1	X:111348529-111348595	-0.0290129	0.00345297	0.0340481	Cassette	In vs Post
FHL1	X:111365850-111366049	0.132728	3.54227e-10	2.07206e-08	Cassette	Pre vs Post
FHL1	X:111310995-111311144	-0.131652	0.00168185	0.0111459	AltStart	Pre vs Post
FKBP5	7:31540362-31540442	0.218929	8.55463e-10	1.6309e-07	AltEnd	Pre vs In
FKBP5	7:31457043-31457166	0.0644958	5.64464e-08	7.17417e-06	Cassette	Pre vs In
FKBP5	7:31579585-31579665	0.563043	9.53213e-05	0.00194305	AltStart	In vs Post
FKBP5	7:31540362-31540442	0.25172	2.77448e-10	1.67819e-08	AltEnd	Pre vs Post
FKBP5	7:31457043-31457166	0.0674923	5.89132e-09	2.5916e-07	Cassette	Pre vs Post
FKBP5	7:31449489-31455169	0.0162803	0.00119577	0.0085419	A5SS	Pre vs Post
FKBP5	7:31579585-31579665	0.341615	0.00538987	0.027211	AltStart	Pre vs Post
FLNA	X:124906185-124906208	0.0773718	0.000940755	0.0256167	Cassette	Pre vs In
FLNA	X:124906185-124906208	0.146405	1.21526e-07	5.92352e-06	Cassette	In vs Post
FLNA	X:124906185-124906208	0.223777	1.16984e-17	2.13439e-15	Cassette	Pre vs Post
FLNB	13:39908653-39908724	-0.0647014	0.000435041	0.014439	Cassette	Pre vs In
FLNB	13:39914433-39914505	-0.0434783	0.000309905	0.00509872	A5SS	In vs Post
FLNB	13:39908653-39908724	-0.0791125	1.86584e-07	5.54496e-06	Cassette	Pre vs Post
FLNB	13:39897878-39897970	-0.0764228	8.10039e-06	0.000142422	Cassette	Pre vs Post
FLNB	13:39914433-39914505	-0.0375	0.000574349	0.0047828	A5SS	Pre vs Post
FRYL	8:38448691-38448861	-0.0474619	0.000944031	0.0256441	Cassette	Pre vs In
FRYL	8:38400371-38400388	-0.131385	0.000243119	0.00416362	Cassette	In vs Post
FRYL	8:38400371-38400388	-0.150433	2.76735e-05	0.000409021	Cassette	Pre vs Post
FRYL	8:38448691-38448861	-0.05	0.000215507	0.00217945	Cassette	Pre vs Post
FUBP3	1:270672012-270672092	-0.272031	1.14401e-08	1.72597e-06	AltStart	Pre vs In
FUBP3	1:270692492-270695251	0.0613264	0.00146085	0.0347154	A3SS	Pre vs In
FUBP3	1:270672012-270672092	0.175796	7.61983e-06	0.000230864	AltStart	In vs Post
FUBP3	1:270672994-270673177	-0.47666	0.000740531	0.0102647	Cassette	In vs Post
FUBP3	1:270653740-270654595	0.116435	1.09977e-06	2.52109e-05	Cassette	Pre vs Post
FUBP3	1:270692492-270695251	0.0163815	0.000613798	0.00504524	A3SS	Pre vs Post
FUBP3	1:270695757-270695887	0.0942333	0.0055263	0.0277174	Cassette	Pre vs Post
GATA4	14:14884682-14884762	-0.106028	3.84057e-05	0.00211949	AltStart	Pre vs In
GATA4	14:14884682-14884762	0.102296	0.000643837	0.00917086	AltStart	In vs Post
GATA4	14:14924442-14927923	0.270161	0.00681493	0.0325523	A3SS	Pre vs Post
GFM2	2:83779784-83780195	0.154163	0.00229975	0.0473289	IR	Pre vs In
GFM2	2:83779784-83780195	0.0867214	2.66083e-11	2.47949e-09	IR	In vs Post
GFM2	2:83779784-83780195	0.240885	2.53757e-20	6.27598e-18	IR	Pre vs Post
GJC1	12:18548671-18548751	0.328571	0.000863276	0.0240926	AltStart	Pre vs In
GJC1	12:18526634-18526818	0.627635	2.0008e-09	1.38236e-07	AltStart	In vs Post
GJC1	12:18548671-18548751	0.430556	3.1164e-13	3.27207e-11	AltStart	Pre vs Post
GJC1	12:18526634-18526818	0.675254	2.70111e-09	1.2847e-07	AltStart	Pre vs Post
GJC1	12:18552150-18552337	0.304301	0.000221897	0.00223595	Cassette	Pre vs Post
GLCCI1	9:78116758-78229458	-0.104023	0.0014185	0.034153	Cassette_multi	Pre vs In
GLCCI1	9:78218306-78232302	0.588889	0.000150319	0.00283003	AltStart	In vs Post
GLCCI1	9:77936769-77936849	0.10989	0.00015183	0.00285121	AltStart	In vs Post
GLCCI1	9:78116758-78229458	-0.0678063	0.00015024	0.00163771	Cassette_multi	Pre vs Post
GLCCI1	9:78063977-78064007	0.179324	0.00128278	0.00901306	Cassette	Pre vs Post
GLIPR1	5:38767158-38767312	0.168182	0.000158914	0.00654085	AltStart	Pre vs In
GLIPR1	5:38767158-38767312	-0.204545	6.21547e-35	4.9231e-32	AltStart	In vs Post
GLIPR1	5:38767158-38767312	-0.0363636	2.16847e-09	1.05619e-07	AltStart	Pre vs Post
GLIPR1	5:38780959-38781046	0.200147	0.000992396	0.00734855	Cassette	Pre vs Post
GLS	15:95551943-95552482	0.0428372	0.000227768	0.00858759	Cassette_multi	Pre vs In
GLS	15:95551943-95552482	0.105452	0.000116917	0.00230079	Cassette_multi	In vs Post
GLS	15:95547842-95552482	0.285507	1.58618e-16	2.50403e-14	Cassette	Pre vs Post
GLS	15:95562978-95563037	0.0101851	0.00360525	0.0200878	A3SS	Pre vs Post
GSTA2	7:46545667-46545718	0.175623	2.55805e-18	1.44986e-15	Cassette	Pre vs In
GSTA2	7:46551499-46554212	0.0256205	7.21131e-13	2.29134e-10	AltEnd	Pre vs In
GSTA2	7:46567388-46567966	-0.0798945	5.6908e-12	1.63482e-09	AltStart	Pre vs In
GSTA2	7:46560601-46560874	-0.0451594	7.16568e-09	1.12143e-06	Cassette	Pre vs In
GSTA2	7:46560896-46561713	0.0110949	4.30187e-06	0.000326864	MXE	Pre vs In
GSTA2	7:46566530-46566778	0.00804463	2.47039e-05	0.00145934	Cassette	Pre vs In
GSTA2	7:46558220-46558300	0.00353071	0.000361488	0.0124186	AltStart	Pre vs In
GSTA2	7:46560750-46560801	0.721201	7.94339e-157	1.76169e-152	MXE	In vs Post
GSTA2	7:46557313-46557432	0.649932	3.44538e-111	1.91029e-107	A3SS	In vs Post
GSTA2	7:46567388-46567966	0.604859	1.33429e-50	2.1137e-47	AltStart	In vs Post
GSTA2	7:46556172-46556391	0.972493	1.05637e-38	1.11563e-35	MXE	In vs Post
GSTA2	7:46579068-46579150	-0.0551933	1.81956e-29	1.03473e-26	A5SS	In vs Post
GSTA2	7:46551499-46554212	0.0124547	2.62457e-23	8.95502e-21	Cassette	In vs Post
GSTA2	7:46587569-46587683	-0.266686	2.8999e-22	8.83853e-20	Cassette	In vs Post
GSTA2	7:46544446-46545604	0.0566689	5.09667e-21	1.39548e-18	Cassette	In vs Post
GSTA2	7:46545667-46545809	-0.178251	1.14585e-19	2.73255e-17	Cassette	In vs Post
GSTA2	7:46587780-46587904	0.0898514	2.8833e-16	5.28478e-14	Cassette	In vs Post
GSTA2	7:46574731-46574741	-0.977458	7.84714e-15	1.16023e-12	A5SS	In vs Post
GSTA2	7:46550700-46550780	0.0809184	4.07807e-06	0.00013281	AltStart	In vs Post
GSTA2	7:46576752-46576865	0.0193681	8.64755e-05	0.00179406	Cassette	In vs Post
GSTA2	7:46540987-46541067	0.00362651	8.69407e-05	0.00180203	AltEnd	In vs Post
GSTA2	7:46578274-46578357	-0.00178074	0.00139161	0.0169764	A3SS	In vs Post
GSTA2	7:46557865-46557945	0.00485664	0.00355321	0.0347303	AltStart	In vs Post
GSTA2	7:46563274-46563460	-0.21039	0.0059137	0.0496907	A3SS	In vs Post
GSTA2	7:46587780-46587938	0.10295	4.49869e-28	2.44235e-25	Cassette	Pre vs Post
GSTA2	7:46576111-46576865	0.0623959	1.3941e-26	6.08456e-24	Cassette	Pre vs Post
GSTA2	7:46567388-46567966	0.490335	1.2012e-22	3.932e-20	AltStart	Pre vs Post
GSTA2	7:46550700-46550780	0.178198	1.17664e-19	2.59315e-17	AltStart	Pre vs Post
GSTA2	7:46559741-46560874	0.721201	5.38108e-19	1.08889e-16	MXE	Pre vs Post
GSTA2	7:46572516-46574709	0.681416	1.2007e-17	2.17287e-15	A5SS	Pre vs Post
GSTA2	7:46539089-46539113	-0.012268	6.15869e-15	8.20876e-13	A3SS	Pre vs Post
GSTA2	7:46556311-46556391	0.00306872	1.62099e-13	1.79511e-11	AltEnd	Pre vs Post
GSTA2	7:46565001-46566778	0.00822127	2.91749e-12	2.66289e-10	Cassette	Pre vs Post
GSTA2	7:46544446-46545604	0.041447	1.35811e-11	1.057e-09	Cassette	Pre vs Post
GSTA2	7:46587569-46587683	-0.200142	5.41364e-11	3.80133e-09	Cassette_multi	Pre vs Post
GSTA2	7:46572351-46572482	0.12884	5.63006e-10	3.15666e-08	Cassette	Pre vs Post
GSTA2	7:46540085-46540141	0.875303	1.90936e-08	7.34032e-07	A3SS	Pre vs Post
GSTA2	7:46557865-46557945	0.0118399	5.68703e-08	1.95956e-06	AltStart	Pre vs Post
GSTA2	7:46571420-46571509	0.00234225	3.0052e-06	6.07013e-05	A3SS	Pre vs Post
GSTA2	7:46574741-46574851	0.0031407	1.23878e-05	0.00020547	MXE	Pre vs Post
GSTA2	7:46557518-46557598	0.00836253	0.000109254	0.00126135	AltStart	Pre vs Post
GSTA2	7:46574708-46574739	0.0146136	0.000872962	0.00665226	Cassette	Pre vs Post
GSTA2	7:46578274-46578357	0.00149887	0.00181675	0.0118223	A3SS	Pre vs Post
GTPBP1	5:9274168-9274248	-0.0543294	0.00132028	0.0323831	AltEnd	Pre vs In
GTPBP1	5:9319613-9319847	0.152436	0.00558392	0.0476941	IR	In vs Post
GTPBP1	5:9275767-9275881	0.0320513	0.0026254	0.0157432	Cassette	Pre vs Post
HDAC1	6:88787054-88787083	0.141654	8.45786e-05	0.00391545	Cassette	Pre vs In
HDAC1	6:88787054-88787083	-0.281305	3.14978e-16	5.72589e-14	Cassette	In vs Post
HDAC1	6:88787482-88788004	0.163265	2.44773e-07	1.11014e-05	Cassette_multi	In vs Post
HDAC1	6:88783851-88784318	0.0252149	2.41857e-05	0.000618291	IR	In vs Post
HDAC1	6:88787482-88788004	0.163265	7.98736e-07	1.91585e-05	Cassette_multi	Pre vs Post
HDAC1	6:88787054-88787083	-0.139651	1.67643e-06	3.662e-05	Cassette	Pre vs Post
HDAC1	6:88783851-88784318	0.0562864	5.96251e-05	0.000768053	IR	Pre vs Post
HERPUD1	6:18905897-18906028	0.0652125	2.158e-05	0.00130044	A5SS	Pre vs In
HERPUD1	6:18906332-18906412	0.065147	5.03969e-05	0.00262251	AltEnd	Pre vs In
HERPUD1	6:18908674-18909207	-0.00274268	0.00352273	0.0345696	A3SS	In vs Post
HERPUD1	6:18905897-18906028	0.0796187	5.93489e-09	2.59958e-07	A5SS	Pre vs Post
HERPUD1	6:18906332-18907029	0.0773206	1.73346e-06	3.76806e-05	Cassette	Pre vs Post
HEXB	2:83784058-83784203	0.0848682	5.313e-05	0.00271754	IR	Pre vs In
HEXB	2:83784058-83784203	0.0577322	0.000436582	0.00673332	IR	In vs Post
HEXB	2:83784058-83784203	0.1426	3.11943e-16	4.7235e-14	IR	Pre vs Post
HFM1	4:125531296-125531408	-0.299241	0.00121614	0.0305434	Cassette	Pre vs In
HFM1	4:125602246-125602336	0.171121	0.00269204	0.0283765	Cassette	In vs Post
HFM1	4:125522642-125522916	0.285714	0.00466482	0.0244546	AltStart	Pre vs Post
HFM1	4:125602246-125602336	0.134764	0.0111958	0.0471269	Cassette	Pre vs Post
HIBCH	15:94808017-94808097	0.122275	0.000210463	0.00818511	AltStart	Pre vs In
HIBCH	15:94804398-94807951	0.00777741	8.22621e-07	3.21765e-05	A3SS	In vs Post
HIBCH	15:94929665-94930058	0.0154911	0.00337172	0.0334727	Cassette	In vs Post
HIBCH	15:94804398-94807951	0.130434	6.10675e-17	1.00689e-14	A3SS	Pre vs Post
HIBCH	15:94808017-94808097	0.130367	1.65394e-13	1.82253e-11	AltStart	Pre vs Post
HIBCH	15:94929665-94930058	0.0598904	1.43894e-05	0.000234133	Cassette	Pre vs Post
HNRNPA2B1	18:46214639-46214774	0.0511382	5.93317e-05	0.002959	Cassette_multi	Pre vs In
HNRNPA2B1	18:46205621-46208495	0.0710243	5.16415e-07	2.17325e-05	IR	In vs Post
HNRNPA2B1	18:46213425-46214774	0.0858472	4.69675e-06	0.000150745	Cassette_multi	In vs Post
HNRNPA2B1	18:46204297-46204377	0.287363	3.97341e-05	0.000943493	AltEnd	In vs Post
HNRNPA2B1	18:46207210-46208397	0.131821	0.000688879	0.00969414	Cassette_multi	In vs Post
HNRNPA2B1	18:46213267-46213425	0.114954	0.00141552	0.0171925	IR	In vs Post
HNRNPA2B1	18:46214639-46214774	0.313325	8.5658e-36	7.62665e-33	Cassette_multi	Pre vs Post
HNRNPA2B1	18:46205621-46208495	0.0938511	2.17612e-17	3.78423e-15	IR	Pre vs Post
HNRNPA2B1	18:46207210-46208397	0.142004	1.48983e-06	3.29644e-05	Cassette_multi	Pre vs Post
HNRNPA2B1	18:46213267-46213425	0.131499	0.00218545	0.0136416	IR	Pre vs Post
HNRNPA2B1	18:46204297-46204377	0.210178	0.0105171	0.0449464	AltEnd	Pre vs Post
HSPA8	9:49985463-49985752	0.0221819	0.00150422	0.0354041	IR	Pre vs In
HSPA8	9:49985463-49985752	0.00881692	0.00579687	0.0490886	IR	In vs Post
HSPA8	9:49985463-49985752	0.0309988	1.75422e-09	8.7354e-08	IR	Pre vs Post
IARS2	10:9713352-9713527	0.047652	0.000134662	0.00573984	Cassette	Pre vs In
IARS2	10:9737582-9737776	0.121337	0.000952813	0.0125449	IR	In vs Post
IARS2	10:9713352-9713694	0.0387906	2.25191e-09	1.09205e-07	AltEnd	Pre vs Post
IARS2	10:9737582-9737776	0.122692	0.00501883	0.0257644	IR	Pre vs Post
ICA1	9:78364481-78365321	0.00447427	1.45708e-05	0.00094602	AltEnd	Pre vs In
ICA1	9:78364481-78365321	-0.00447427	1.12646e-06	4.24875e-05	AltEnd	In vs Post
ICA1	9:78388487-78389766	0.0405063	0.000772505	0.0106035	A5SS	In vs Post
ICA1	9:78367795-78370663	0.0373753	3.16361e-05	0.000456081	Cassette	Pre vs Post
ICA1	9:78388487-78389766	0.0235294	4.30392e-05	0.000589908	A5SS	Pre vs Post
ICA1	9:78379145-78382957	0.0288652	0.00325268	0.018536	A3SS	Pre vs Post
ICA1	9:78383023-78388200	0.050317	0.00456328	0.0240184	Cassette	Pre vs Post
INSR	2:71904820-71904855	-0.139829	6.20696e-09	9.93635e-07	Cassette	Pre vs In
INSR	2:71904820-71904855	-0.189286	1.96349e-06	6.98976e-05	Cassette	In vs Post
INSR	2:71904820-71904855	-0.329115	7.88152e-27	3.5803e-24	Cassette	Pre vs Post
IPO11	16:41292847-41293103	-0.227958	4.6245e-05	0.00247399	AltStart	Pre vs In
IPO11	16:41292847-41293103	-0.253902	3.60384e-13	4.41579e-11	AltStart	In vs Post
IPO11	16:41294655-41294735	-0.136618	1.90291e-05	0.000502412	AltEnd	In vs Post
IPO11	16:41292847-41293103	-0.486069	2.19958e-31	1.68829e-28	AltStart	Pre vs Post
IPO11	16:41294655-41294735	-0.150417	8.60872e-07	2.04287e-05	AltEnd	Pre vs Post
IPO11	16:41293602-41293648	-0.145521	0.000444397	0.00390389	Cassette_multi	Pre vs Post
IPO11	16:41334004-41335434	-0.0219629	0.000733812	0.0058004	AltEnd	Pre vs Post
IQGAP2	2:85536654-85536734	-0.10298	0.00010704	0.00473784	AltStart	Pre vs In
IQGAP2	2:85570228-85570308	0.0194932	0.000601568	0.0182568	AltStart	Pre vs In
IQGAP2	2:85541541-85545810	-0.102987	0.000985993	0.0264077	A3SS	Pre vs In
IQGAP2	2:85354770-85354850	-0.027027	0.00403129	0.0378669	AltStart	In vs Post
IQGAP2	2:85541541-85545810	-0.106927	1.34169e-06	3.00751e-05	A3SS	Pre vs Post
IQGAP2	2:85536654-85536734	-0.108049	4.09115e-06	7.78999e-05	AltStart	Pre vs Post
IQGAP2	2:85529597-85531892	0.0146062	2.53376e-05	0.000382625	A5SS	Pre vs Post
IQGAP2	2:85507353-85511777	0.0181747	0.000258119	0.00250675	A3SS	Pre vs Post
IQGAP2	2:85570694-85573904	0.0126789	0.000982552	0.00729994	A3SS	Pre vs Post
IQGAP2	2:85354770-85354850	-0.027027	0.00401854	0.021769	AltStart	Pre vs Post
JMJD8	3:41092482-41092900	0.0876635	0.0017822	0.0395458	A5SS	Pre vs In
JMJD8	3:41092978-41093238	0.14272	0.000152927	0.0028597	Cassette_multi	In vs Post
JMJD8	3:41092482-41092900	0.195092	0.000279704	0.0046959	A5SS	In vs Post
JMJD8	3:41094410-41094903	0.0557014	0.0041558	0.0386122	IR	In vs Post
JMJD8	3:41092978-41093094	0.20551	7.40478e-13	7.42446e-11	Cassette_multi	Pre vs Post
JMJD8	3:41092482-41092900	0.282756	5.96678e-10	3.30384e-08	A5SS	Pre vs Post
JMJD8	3:41093478-41093958	-0.199376	0.000164961	0.00176617	IR	Pre vs Post
KDM6A	X:39968436-39968516	0.195652	0.000154227	0.00639189	AltEnd	Pre vs In
KDM6A	X:40130530-40131728	0.228561	0.00369087	0.035792	A3SS	In vs Post
KDM6A	X:39954633-39968391	0.232394	0.000141459	0.00155494	A5SS	Pre vs Post
KDM6A	X:40128932-40130487	0.261391	0.000308718	0.00290315	A5SS	Pre vs Post
KDM6A	X:40130530-40131728	0.261391	0.000634408	0.00518022	A3SS	Pre vs Post
KDM6A	X:39968436-39968516	0.23913	0.00211338	0.0132848	AltEnd	Pre vs Post
KDM6A	X:40064333-40064372	0.0454443	0.00744316	0.0347478	MXE	Pre vs Post
KIAA1109	8:101781576-101781776	-0.254464	1.9321e-09	3.49294e-07	Cassette	Pre vs In
KIAA1109	8:101775819-101775881	-0.464431	5.89774e-13	7.07028e-11	Cassette	In vs Post
KIAA1109	8:101781576-101781776	-0.234286	1.99845e-06	7.09148e-05	Cassette	In vs Post
KIAA1109	8:101781576-101781776	-0.48875	9.81883e-26	3.90281e-23	Cassette	Pre vs Post
KIAA1109	8:101775819-101775881	-0.541639	1.34075e-18	2.59511e-16	Cassette	Pre vs Post
KIAA1109	8:101874508-101874588	0.0767556	0.000385808	0.00348244	AltEnd	Pre vs Post
KIAA1109	8:101772116-101772196	0.0636943	0.00685018	0.0326786	AltStart	Pre vs Post
KIAA1109	8:101874701-101875100	0.0497512	0.00960966	0.0418921	A5SS	Pre vs Post
KIAA1841	3:80728759-80728852	-0.468941	9.28928e-14	3.19353e-11	Cassette	Pre vs In
KIAA1841	3:80728759-80728852	0.409889	7.78153e-12	7.77381e-10	Cassette	In vs Post
KIAA1841	3:80739889-80740045	0.0729601	0.00415655	0.0223558	Cassette	Pre vs Post
KIF13A	7:13526999-13527037	-0.21759	0.000195509	0.00769235	Cassette	Pre vs In
KIF13A	7:13526999-13527037	-0.126616	0.000397648	0.00624136	Cassette	In vs Post
KIF13A	7:13526999-13527037	-0.344206	1.98668e-14	2.45676e-12	Cassette	Pre vs Post
KIF13A	7:13507066-13509981	0.0893035	0.0115143	0.0480768	Cassette	Pre vs Post
KIF21A	5:70923279-70923299	-0.229167	5.81681e-07	5.98166e-05	Cassette	Pre vs In
KIF21A	5:70923279-70923299	-0.277754	1.34794e-08	7.99324e-07	Cassette	In vs Post
KIF21A	5:70939250-70939288	0.0530303	0.000149017	0.00281269	Cassette	In vs Post
KIF21A	5:70923279-70923299	-0.50692	7.77956e-21	2.16457e-18	Cassette	Pre vs Post
KIF21A	5:70913940-70915199	0.0665188	0.0113333	0.0476067	A5SS	Pre vs Post
KIF21A	5:70895456-70896539	0.0818577	0.011521	0.0480955	A5SS	Pre vs Post
KIT	8:41485889-41486011	-0.148161	1.7207e-06	0.000150353	Cassette	Pre vs In
KIT	8:41478044-41478056	-0.134557	1.34811e-05	0.000374197	A5SS	In vs Post
KIT	8:41485889-41486011	-0.10894	0.000439696	0.0038725	Cassette	Pre vs Post
KIT	8:41478044-41478056	-0.105538	0.00126883	0.00894326	A5SS	Pre vs Post
KLHL32	1:64099220-64099307	0.164566	0.00043808	0.0144905	Cassette	Pre vs In
KLHL32	1:64168220-64168300	-0.0833333	0.00282333	0.0294801	AltEnd	In vs Post
KLHL32	1:64181314-64181394	0.139089	1.41013e-05	0.000230287	AltEnd	Pre vs Post
KLHL32	1:64099220-64099307	0.155637	0.000568856	0.00475485	Cassette	Pre vs Post
KLHL32	1:64178718-64181161	0.136549	0.000654558	0.00530673	A5SS	Pre vs Post
KMT2E	9:104935009-104935074	0.385694	0.000805945	0.0229017	Cassette	Pre vs In
KMT2E	9:104935009-104935074	-0.391129	0.00354586	0.0346891	Cassette	In vs Post
KMT2E	9:105021784-105021876	-0.0774154	0.00478232	0.0248889	Cassette	Pre vs Post
KMT2E	9:104962323-104962411	0.0151415	0.00479375	0.0249192	Cassette	Pre vs Post
LAMA1	6:100353149-100353229	21::32	-0.0282353	5.40833e-05	0.00275287	AltStart
LAMA1	6:100353149-100353229	0.0287081	0.000773544	0.0106096	AltStart	In vs Post
LAMA1	6:100417930-100418010	0.0270334	0.00711922	0.0336766	AltStart	Pre vs Post
LAMA1	6:100356801-100356849	0.0339517	0.0106973	0.0455368	A3SS	Pre vs Post
LARP4	5:16298923-16298971	0.172973	1.68164e-07	1.92709e-05	Cassette	Pre vs In
LARP4	5:16298923-16298971	-0.13964	9.09381e-07	3.52592e-05	Cassette	In vs Post
LARP4	5:16284949-16285579	-0.0437888	2.08467e-05	0.000320807	AltStart	Pre vs Post
LCORL	8:12905037-12905083	0.247475	3.42073e-07	3.73626e-05	Cassette	Pre vs In
LCORL	8:12849933-12850013	0.15848	0.000343086	0.00552977	AltEnd	In vs Post
LCORL	8:12905037-12905083	0.268248	3.22423e-12	2.89388e-10	Cassette	Pre vs Post
LCORL	8:12849933-12850013	0.214543	7.29e-06	0.000129815	AltEnd	Pre vs Post
LCORL	8:12917178-12917212	0.129957	0.00170499	0.0112599	Cassette	Pre vs Post
LHFPL2	2:87462011-87462063	0.164926	1.11414e-05	0.000756135	Cassette	Pre vs In
LHFPL2	2:87450152-87450232	0.115288	0.00115891	0.0295303	AltStart	Pre vs In
LHFPL2	2:87359952-87360071	-0.463714	1.93835e-33	1.30269e-30	AltStart	In vs Post
LHFPL2	2:87352163-87352300	-0.21336	1.0878e-07	5.39716e-06	Cassette	In vs Post
LHFPL2	2:87462011-87462063	-0.37037	0.00356415	0.034776	MXE	In vs Post
LHFPL2	2:87359952-87360071	-0.570166	4.3998e-52	6.99536e-49	AltStart	Pre vs Post
LHFPL2	2:87337002-87349250	0.0100378	3.01555e-07	8.51869e-06	A5SS	Pre vs Post
LHFPL2	2:87415255-87450122	0.113134	0.000144851	0.00158673	A3SS	Pre vs Post
LHFPL2	2:87352163-87352300	-0.100648	0.000320416	0.00299167	Cassette	Pre vs Post
LHFPL2	2:87462011-87462063	0.151879	0.000463684	0.00403453	Cassette	Pre vs Post
LHFPL2	2:87325480-87336871	0.0100605	0.000686047	0.00549843	A3SS	Pre vs Post
LHFPL2	2:87483303-87487949	-0.049684	0.000990032	0.00733348	Cassette	Pre vs Post
LHFPL2	2:87450152-87450232	0.117783	0.00220091	0.0136997	AltStart	Pre vs Post
LRCH3	13:134486154-134486238	-0.0593967	0.0020779	0.0441049	A5SS	Pre vs In
LRCH3	13:134506031-134506084	0.130872	0.00303706	0.0310253	Cassette	In vs Post
LRCH3	13:134486154-134486238	-0.0528546	0.00427117	0.0227663	A5SS	Pre vs Post
LRP8	6:158945967-158947841	0.109664	4.07258e-10	8.29186e-08	Cassette	Pre vs In
LRP8	6:158982478-158982505	0.312146	1.06465e-09	2.01141e-07	IR	Pre vs In
LRP8	6:158953400-158953438	0.148951	4.57058e-09	7.70441e-07	Cassette	Pre vs In
LRP8	6:158979650-158981622	-0.0799458	9.9092e-08	1.18746e-05	A5SS	Pre vs In
LRP8	6:158949222-158949452	0.0078275	6.53085e-06	0.000469036	A5SS	Pre vs In
LRP8	6:158951088-158951210	-0.11738	1.28318e-05	0.000861753	MXE	Pre vs In
LRP8	6:158953400-158953438	-0.728947	8.9679e-142	9.94451e-138	Cassette	In vs Post
LRP8	6:158951088-158951210	0.706833	5.24063e-134	3.87422e-130	MXE	In vs Post
LRP8	6:158979474-158979650	0.131927	0.00026585	0.00448708	Cassette	In vs Post
LRP8	6:158939122-158939244	0.365749	0.00251867	0.026972	MXE	In vs Post
LRP8	6:158953400-158953438	-0.579996	1.36458e-89	7.59356e-86	Cassette	Pre vs Post
LRP8	6:158951088-158951210	0.589452	3.13417e-64	9.96622e-61	MXE	Pre vs Post
LRP8	6:158979474-158979650	0.171498	1.80085e-07	5.38683e-06	Cassette	Pre vs Post
LRP8	6:158945848-158947841	0.0747314	2.07727e-07	6.08394e-06	A5SS	Pre vs Post
LRP8	6:158947866-158948839	0.0932887	0.000114948	0.00131481	A3SS	Pre vs Post
LRP8	6:158960772-158961050	-4.37044e-05	0.00768498	0.0355976	A3SS	Pre vs Post
MAN2A2	7:53514150-53514224	0.168428	0.000119314	0.00522367	Cassette	Pre vs In
MAN2A2	7:53510140-53510366	0.142991	0.0001536	0.00286746	IR	In vs Post
MAN2A2	7:53516718-53516859	-0.124609	0.00151727	0.0182286	Cassette	In vs Post
MAN2A2	7:53514150-53514224	0.202448	2.44249e-11	1.7943e-09	Cassette	Pre vs Post
MAN2A2	7:53516718-53516859	-0.101831	0.00854689	0.0383536	Cassette	Pre vs Post
MAN2A2	7:53510107-53510140	0.0646754	0.0109039	0.046213	A5SS	Pre vs Post
MAP4K3	3:101033790-101033870	0.138249	7.47867e-07	7.43295e-05	AltStart	Pre vs In
MAP4K3	3:101034174-101038062	0.142202	0.000498934	0.0159743	A3SS	Pre vs In
MAP4K3	3:101033790-101033870	-0.0805687	0.000461163	0.00705844	AltStart	In vs Post
MAP4K3	3:101034174-101038062	0.0616331	0.000172942	0.00183259	A3SS	Pre vs Post
MAPK1IP1L	1:184411112-184412127	0.142668	0.000675046	0.0197992	IR	Pre vs In
MAPK1IP1L	1:184411112-184412127	0.172673	0.000303775	0.00501647	IR	In vs Post
MAPK1IP1L	1:184411112-184412127	0.315341	1.70191e-12	1.59843e-10	IR	Pre vs Post
MARCKSL1	6:88787054-88787083	0.141654	0.000138381	0.00585077	Cassette	Pre vs In
MARCKSL1	6:88787054-88787568	0.282659	5.87002e-35	4.9231e-32	AltStart	In vs Post
MARCKSL1	6:88787054-88787083	-0.281305	1.20641e-15	2.04242e-13	Cassette	In vs Post
MARCKSL1	6:88787054-88787568	0.282659	2.55456e-33	2.03079e-30	AltStart	Pre vs Post
MARCKSL1	6:88787054-88787083	-0.139651	2.26439e-06	4.77762e-05	Cassette	Pre vs Post
MARK1	10:10042078-10042158	0.0631933	0.00140017	0.0339457	AltEnd	Pre vs In
MARK1	10:10092372-10093312	0.20374	0.000308355	0.00508076	A5SS	In vs Post
MARK1	10:9980457-9991572	0.300325	0.000319383	0.00298453	A5SS	Pre vs Post
MARK1	10:9991621-9991701	0.300325	0.00210771	0.013268	AltEnd	Pre vs Post
MCTP1	2:101739115-101739336	-0.234171	6.43547e-06	0.000463774	AltStart	Pre vs In
MCTP1	2:101621520-101621558	-0.199819	2.46909e-07	1.11754e-05	Cassette_multi	In vs Post
MCTP1	2:101624660-101624704	-0.167832	4.01914e-05	0.000953162	Cassette	In vs Post
MCTP1	2:101739115-101739336	-0.124291	0.000184069	0.00332705	AltStart	In vs Post
MCTP1	2:101739115-101739336	-0.360677	1.54484e-22	4.91236e-20	AltStart	Pre vs Post
MCTP1	2:101621520-101621558	-0.199055	2.7737e-06	5.68507e-05	Cassette_multi	Pre vs Post
MCTP1	2:101624660-101624704	-0.140805	0.00241249	0.0147445	Cassette	Pre vs Post
MFF	15:128788472-128788630	0.170023	0.000131435	0.00564819	Cassette_multi	Pre vs In
MFF	15:128792545-128792577	-0.248003	2.4719e-09	1.67651e-07	Cassette	In vs Post
MFF	15:128788472-128788630	-0.191264	1.98023e-07	9.16857e-06	Cassette_multi	In vs Post
MFF	15:128792545-128792577	-0.312785	5.9226e-11	4.09001e-09	Cassette	Pre vs Post
MFF	15:128794310-128794369	-0.0955785	0.000329928	0.00305485	Cassette_multi	Pre vs Post
MFF	15:128784093-128784167	-0.0561455	0.00084724	0.00649181	Cassette	Pre vs Post
MFF	15:128773044-128773221	-0.0183828	0.00104995	0.00769284	Cassette	Pre vs Post
MFHAS1	15:56282330-56282456	0.0527916	5.39817e-08	6.90274e-06	Cassette	Pre vs In
MFHAS1	15:56282330-56282456	-0.0450586	0.000288259	0.00480316	Cassette_multi	In vs Post
MFHAS1	15:56282456-56287990	0.00400172	2.96688e-05	0.000432649	A5SS	Pre vs Post
MGARP	8:87699884-87700544	0.00939586	7.59102e-11	1.76879e-08	AltEnd	Pre vs In
MGARP	8:87708887-87709001	0.00626566	0.00202997	0.0433508	AltStart	Pre vs In
MGARP	8:87700464-87701740	0.0338983	6.37533e-08	3.32687e-06	Cassette	In vs Post
MGARP	8:87699884-87700378	0.0123251	1.46265e-05	0.000401966	Cassette_multi	In vs Post
MGARP	8:87699884-87700378	0.0213756	2.06736e-19	4.38261e-17	Cassette_multi	Pre vs Post
MGARP	8:87700464-87701740	0.0338983	3.00977e-17	5.07534e-15	Cassette	Pre vs Post
MGARP	8:87708887-87709001	0.00653641	2.21677e-11	1.667e-09	AltStart	Pre vs Post
MGARP	8:87711516-87711680	0.0624032	0.000136502	0.0015064	Cassette	Pre vs Post
MICU2	11:1449698-1449778	0.0696811	0.00113102	0.0292442	AltEnd	Pre vs In
MICU2	11:1449825-1455412	0.0407344	1.01651e-05	0.000294161	A5SS	In vs Post
MICU2	11:1456809-1457521	0.107752	1.54609e-05	0.000421243	Cassette_multi	In vs Post
MICU2	11:1449698-1449778	0.0410795	8.21498e-05	0.00171233	AltEnd	In vs Post
MICU2	11:1425141-1427143	0.0157951	0.000649449	0.00922708	A3SS	In vs Post
MICU2	11:1422735-1423679	0.0310795	0.00223215	0.0245437	Cassette	In vs Post
MICU2	11:1449698-1449778	0.110761	1.19849e-13	1.34734e-11	AltEnd	Pre vs Post
MICU2	11:1449825-1455412	0.10876	7.86003e-10	4.23623e-08	A5SS	Pre vs Post
MICU2	11:1425141-1427143	-0.0187793	5.77564e-09	2.55548e-07	A3SS	Pre vs Post
MICU2	11:1456809-1457521	0.18855	1.45439e-07	4.46118e-06	Cassette_multi	Pre vs Post
MICU2	11:1422735-1423679	0.075216	6.5154e-06	0.000117716	Cassette	Pre vs Post
MKLN1	18:17607824-17607965	0.0780889	0.00019073	0.00757536	Cassette	Pre vs In
MKLN1	18:17692399-17692562	-0.548827	1.14434e-08	6.89651e-07	MXE	In vs Post
MKLN1	18:17688619-17688699	-0.276899	2.0141e-08	1.16325e-06	AltEnd	In vs Post
MKLN1	18:17751844-17751924	0.424621	3.76779e-07	1.62035e-05	AltStart	In vs Post
MKLN1	18:17508842-17508922	0.0855381	3.96438e-07	1.69081e-05	AltEnd	In vs Post
MKLN1	18:17700590-17700734	0.481579	9.17591e-05	0.00188604	MXE	In vs Post
MKLN1	18:17531390-17531470	0.0335192	0.000168796	0.00309386	AltEnd	In vs Post
MKLN1	18:17700590-17740775	0.481579	0.00308356	0.0313453	MXE	In vs Post
MKLN1	18:17824081-17824161	0.346025	0.00538544	0.0463658	AltStart	In vs Post
MKLN1	18:17561988-17565297	0.0705162	1.94126e-08	7.43725e-07	A5SS	Pre vs Post
MKLN1	18:17607824-17607965	0.090172	7.22986e-08	2.41274e-06	Cassette	Pre vs Post
MKLN1	18:17590708-17590797	0.0180431	3.70748e-05	0.000521318	Cassette	Pre vs Post
MKLN1	18:17533557-17553627	-0.0368764	0.000152737	0.00165924	A3SS	Pre vs Post
MKLN1	18:17553841-17554494	-0.0374449	0.000176218	0.00186073	A5SS	Pre vs Post
MKLN1	18:17509246-17515478	0.0768017	0.000487808	0.00420531	A5SS	Pre vs Post
MKLN1	18:17506425-17508922	0.0788981	0.00281162	0.0166269	A3SS	Pre vs Post
MKLN1	18:17509117-17509197	0.0326624	0.00594282	0.0292917	AltEnd	Pre vs Post
MKLN1	18:17751844-17751924	0.32398	0.00762425	0.0354001	AltStart	Pre vs Post
MLH3	7:98237372-98238241	-0.00699301	0.00119797	0.0301956	Cassette_multi	Pre vs In
MLH3	7:98259529-98259588	-0.0975577	0.000161282	0.00298325	A5SS	In vs Post
MLH3	7:98250016-98250132	-0.0351878	0.00498848	0.025644	Cassette	Pre vs Post
MON2	5:27210880-27210897	-0.393704	1.86145e-14	6.97081e-12	Cassette	Pre vs In
MON2	5:27210880-27210897	0.284634	1.32654e-07	6.42359e-06	Cassette	In vs Post
MON2	5:27210880-27210897	-0.109071	0.00317806	0.0182274	Cassette	Pre vs Post
MOSPD1	X:110780622-110781864	0.037037	2.13971e-10	4.57875e-08	AltEnd	Pre vs In
MOSPD1	X:110717308-110717365	-0.00304546	1.07943e-08	1.65231e-06	AltStart	Pre vs In
MOSPD1	X:110717308-110717365	0.0235879	1.98548e-07	9.17373e-06	AltStart	In vs Post
MOSPD1	X:110780622-110781864	0.0301899	0.000478295	0.00726053	AltEnd	In vs Post
MOSPD1	X:110780622-110781864	0.0672269	0.0015658	0.0105264	AltEnd	Pre vs Post
MRPL22	16:68245627-68248762	0.0327869	6.67443e-05	0.00318636	A3SS	Pre vs In
MRPL22	16:68277480-68277562	0.157429	0.00123927	0.0309022	IR	Pre vs In
MRPL22	16:68241395-68241457	0.0203263	1.40611e-05	0.000388353	A3SS	In vs Post
MRPL22	16:68245627-68248762	0.0327869	1.05818e-11	8.47263e-10	A3SS	Pre vs Post
MRPL22	16:68277480-68277562	0.220908	1.62376e-08	6.34093e-07	IR	Pre vs Post
MTIF2	3:85963861-85963990	0.224297	0.000442979	0.0146065	Cassette	Pre vs In
MTIF2	3:86046604-86046649	0.464286	0.0010457	0.0135465	A3SS	In vs Post
MTIF2	3:85963861-85963990	0.217628	0.00114023	0.00822807	Cassette	Pre vs Post
MUM1L1	X:86807103-86807234	0.175631	1.91221e-12	5.8972e-10	Cassette	Pre vs In
MUM1L1	X:86792044-86792672	0.0767559	0.000674134	0.0197992	Cassette_multi	Pre vs In
MUM1L1	X:86807103-86807234	-0.156142	6.28587e-10	4.84055e-08	Cassette	In vs Post
MUM1L1	X:86795120-86795142	0.228936	8.74706e-08	4.46987e-06	Cassette	In vs Post
MUM1L1	X:86788361-86788365	0.122654	6.44968e-05	0.00140512	MXE	In vs Post
MUM1L1	X:86792044-86792335	-0.213518	0.00411467	0.0383747	Cassette	In vs Post
MUM1L1	X:86788361-86788365	0.162524	6.55878e-06	0.000118404	MXE	Pre vs Post
MUM1L1	X:86792496-86792672	0.0714237	3.56537e-05	0.000503945	Cassette_multi	Pre vs Post
MUM1L1	X:86789416-86789468	0.35	0.000155123	0.00167861	Cassette	Pre vs Post
MUM1L1	X:86795120-86795142	0.17612	0.000794662	0.00618475	Cassette	Pre vs Post
MUM1L1	X:86791202-86791265	-0.0991765	0.00581218	0.0288329	Cassette	Pre vs Post
MUM1L1	X:86807103-86807234	0.0194885	0.00705086	0.0334282	Cassette	Pre vs Post
MYBPC3	2:15257977-15258057	0.264105	6.35042e-06	0.000459223	AltStart	Pre vs In
MYBPC3	2:15257977-15258057	-0.344444	1.82174e-09	1.26654e-07	AltStart	In vs Post
MYBPC3	2:15262642-15262950	-0.0855339	0.000616207	0.00883974	A3SS	In vs Post
MYBPC3	2:15262642-15262950	-0.0734684	0.00927228	0.0407889	A3SS	Pre vs Post
MYH11	3:7132432-7132521	0.0506329	0.000663506	0.0196254	A5SS	Pre vs In
MYH11	3:7075419-7075439	-0.0778426	4.0284e-08	2.20597e-06	Cassette	In vs Post
MYH11	3:7132432-7132521	-0.0506329	3.03206e-05	0.000746339	A5SS	In vs Post
MYH11	3:7133115-7133280	-0.0506329	0.000166313	0.00305846	A3SS	In vs Post
MYH11	3:7075419-7075439	-0.0719495	1.60416e-06	3.51794e-05	Cassette	Pre vs Post
NAA16	11:25541019-25541159	0.253159	0.000100172	0.00448868	Cassette_multi	Pre vs In
NAA16	11:25533377-25533779	0.191035	0.00538116	0.0463519	IR	In vs Post
NAA16	11:25541019-25541159	0.333597	4.81681e-07	1.26734e-05	Cassette_multi	Pre vs Post
NAA16	11:25533377-25533779	0.255529	7.31031e-05	0.00090551	IR	Pre vs Post
NAA16	11:25585457-25585534	0.100419	0.00222601	0.0138366	A3SS	Pre vs Post
NAA16	11:25579981-25580061	0.0555556	0.00253931	0.0153636	AltEnd	Pre vs Post
NDFIP1	2:143725319-143728196	0.105317	1.52743e-05	0.000979566	IR	Pre vs In
NDFIP1	2:143733627-143734138	0.0010426	0.000926032	0.0253523	IR	Pre vs In
NDFIP1	2:143725319-143728196	0.0398782	1.84604e-06	6.62482e-05	IR	In vs Post
NDFIP1	2:143725319-143728196	0.145196	7.62925e-22	2.32629e-19	IR	Pre vs Post
NDFIP1	2:143733627-143734138	0.000889735	0.000185563	0.00193826	IR	Pre vs Post
NDRG4	6:20267376-20267501	0.0457053	0.000108575	0.00479351	IR	Pre vs In
NDRG4	6:20262613-20262651	0.136573	0.0011925	0.0300938	Cassette	Pre vs In
NDRG4	6:20291550-20291569	0.0334829	0.00395138	0.0373743	A5SS	In vs Post
NDRG4	6:20262613-20262651	0.154531	0.000973115	0.00724686	Cassette	Pre vs Post
NEBL	10:53881774-53881875	0.165439	0.00141399	0.0340838	Cassette	Pre vs In
NEBL	10:53840001-53840877	0.117718	8.68361e-06	0.000258046	AltStart	In vs Post
NEBL	10:53840001-53840877	0.105431	4.47125e-08	1.57977e-06	AltStart	Pre vs Post
NECAP2	6:75534501-75534616	0.0545587	0.00200824	0.0429742	Cassette	Pre vs In
NECAP2	6:75529413-75529513	0.0349154	4.87553e-05	0.00111359	Cassette	In vs Post
NECAP2	6:75534501-75534616	0.0637785	2.44978e-06	5.11536e-05	Cassette	Pre vs Post
NECAP2	6:75529413-75529513	0.0331508	0.000268818	0.00259143	Cassette	Pre vs Post
NFAT5	6:17430217-17430283	0.666667	0.000228091	0.00858759	Cassette	Pre vs In
NFAT5	6:17373782-17379168	0.259925	0.00143802	0.0343862	A5SS	Pre vs In
NFAT5	6:17363422-17366092	0.0523507	0.0015562	0.0363584	Cassette_multi	Pre vs In
[truncated: 579 more rows]

## Sheet: Table S6
Table S6. Statistical significant for number of AS events (Tukey’s test)
[truncated: 10 more rows]

[truncated: 13 more sheets: Table S7, Table S8, Table S9, Table S10, Table S11, Table S12, Table S13, Table S14, Table S15, Table S16, Table S17, Table S18, Table S19]
